# Supplementary material for: Dichotomous role of the human mitochondrial Na+/Ca2+/Li+ exchanger NCLX in colorectal cancer growth and metastasis
Source: eLife. 2020 Sep 11;9:e59686. doi: 10.7554/eLife.59686 (PMC7529464; doi:10.7554/eLife.59686)
Supplement: Figure 1—source data 1. [file elife-59686-fig1-data1.xlsx]

## Sheet: Figure 1
Figure 1B	Normal	Tumor
	1	0.71196
	1	0.30186
	1	0.45394
	1	0.57845
	1	0.39898
	1	0.7358
	1	0.32028
	1	0.49062
	1	0.31528
	1	0.31144
	1	0.34719
	1	0.23163
	1	0.72257
	1	0.09526
	1	0.31575
	1	0.25724
	1	0.33991
	1	0.33979
	1	0.24173
	1	0.32034
	1	0.24626
	1	0.11181
	1	0.29225
	1	0.6929
	1	0.17796
	1	0.11039
	1	0.1621
	1	0.36341
	1	0.65692
	1	0.18979
Figure 1G	Normal (early)	Normal (late)	Tumor (early)	Tumor (late)
	1	1	0.71196	0.34719
	1	1	0.30186	0.23163
	1	1	0.45394	0.72257
	1	1	0.57845	0.09526
	1	1	0.39898	0.31575
	1	1	0.7358	0.25724
	1	1	0.32028	0.33991
	1	1	0.49062	0.33979
	1	1	0.31528	0.24173
	1	1	0.31144	0.32034
		1		0.24626
		1		0.11181
		1		0.29225
		1		0.6929
		1		0.17796
		1		0.11039
		1		0.1621
		1		0.36341
		1		0.65692
		1		0.18979
Figure 1J	Littermates	2	1	2	2	3	3	2	2	3	0	1	1	6	2	1	3	3	1	3	1	2	4	2	3	3	1	4	1	2	3	2	0	0	0	0	0	0	0	2	3
	NCLX KO	2	3	4	4	5	3	2	0	0	0	0	0	0	0	0	1	3	1	2	1	1	1	0	2	3	3	2	2	1	0	0	0	0	0	0	0	0	0	0	0
Figure 1K	Littermates	5	5	3.5	8.5	5.5	5.5	4.5	4	4	3.5	5.5	5.5	4	4	8	9	9.5	7.7	7	6	6.5	7.7	7	10	9.5	9	7	7	7.5	4.4	3	9	9.5	5.5	5	9	5.5	8	7.5	6	6.5	6	7	7	8	6	6.5	5.5
	NCLX KO	2	2.5	2	4	2.5	3.5	4	5	5.5	4.5	3	3.5	2.5	2	5	5.5	4	4.5	8	4.4	4	3	3.5	2	2	2.5	6	4	4.5	3	3	4	5	4.5	6.5	6	4	5.5	5	5	3	3	4	4.5	5	5
Figure 1M	Littermates	NCLX KO
	1	0
	2	0
	3	0
	2	0
	3	1
[truncated: 28 more columns]
