# Supplementary material for: Dichotomous role of the human mitochondrial Na+/Ca2+/Li+ exchanger NCLX in colorectal cancer growth and metastasis
Source: eLife. 2020 Sep 11;9:e59686. doi: 10.7554/eLife.59686 (PMC7529464; doi:10.7554/eLife.59686)
Supplement: Figure 2—source data 1. [file elife-59686-fig2-data1.xlsx]

## Sheet: Figure 2
Figure 2C	Time (weeks)	HCT116	SEM	NCLX KO #33	SEM
	0	0	0	0	0
	1	259434	167647	51646.7	9900.6
	2	4.97517e+06	3.83078e+06	418749	166471
	3	4.37322e+06	714522	308106	103728
	4	45315100	9.89668e+06	3.08489e+06	429746
	5	294263000	87936900	87685600	47028900
	6	848988000	48328300	300575000	58933500
Figure 2E	HCT116	NCLX KO #33
	1.10793	0.24433
	3.57395	0.39014
	1.55319	0.11559
	5.25295	1.2728
	1.83834	1.38265
	5.32072	2.58426
	5.48745
	1.589
	2.72329
Figure 2G	HCT116	NCLX KO #33
	454000	17000000
	88500	2994000
	21300	15400000
	294000	8179000
	366000	10100000
	71300	903700
	105000
	89034
	65400
Figure 2H	HCT116	NCLX KO #33
	102000	78400
	38600	387800
	59900	809000
	211000	411100
	146000	940000
	36100	870000
	195300
	66000
	65700
Figure 2I	HCT116	NCLX KO #33
	100	100
	100	100
	100	100
	100	86.6667
	100	53.3333
	73.3	46.6667
