# Supplementary material for: Dichotomous role of the human mitochondrial Na+/Ca2+/Li+ exchanger NCLX in colorectal cancer growth and metastasis
Source: eLife. 2020 Sep 11;9:e59686. doi: 10.7554/eLife.59686 (PMC7529464; doi:10.7554/eLife.59686)
Supplement: Figure 3—figure supplement 1—source data 1. [file elife-59686-fig3-figsupp1-data1.xlsx]

## Sheet: Figure 3_figure supplement 1
Figure 3-figure supplement 1D		HCT116	NCLX KO #33	NCLX KO #37	NCLX KO#59
		1	0.0097	0.01161	0.00541
		1	0.01688	0.01249	0.01395
		1	0.00728	0.01277	0.01428
		1	0.02443	0.015	0.01994
Figure 3--figure supplement 1H		DLD1	NCLX KO #6	NCLX KO #24	NCLX KO #32
		1	0.07833	0.03052	0.01265
		1	0.01057	0.01694	0.01222
		1	0.02169	0.02502	0.01071
		1	0.03949	0.05963	0.0757
		1	0.04744	0.04647	0.04463
Figure 3-figure supplement 1I	Scramble HCT116	siNCLX #2	siNCLX #3	siNCLX #2+3
	1	0.46481	0.30351	0.44533
	1	0.30109	0.26553	0.33311
	1	0.37342	0.35817	0.38618
	1	0.49795	0.2578	0.4324
	1	0.51462	0.33848	0.74417
	1	0.67114	0.36672	0.67121
Figure 3-figure supplement 1J	Time	Scramble HCT116	SEM	shNCLX #2	SEM	shNCLX #3	SEM	shNCLX #2+3	SEM
	0 hr	1	0	1	0	1	0	1	0
	24 hr	4.16581	0.27128	3.78157	0.24843	3.27773	0.25899	2.64886	0.25514
	48 hr	9.59488	0.61738	8.10493	0.35231	7.98207	0.5629	5.57212	0.43957
	72 hr	13.8389	0.46122	9.12656	0.33317	10.9991	0.61163	7.70343	0.45144
Figure 3-figure supplement 1L	HCT116	NCLX KO #33	NCLX KO #37	NCLX KO #59
	22.8571	44.4444	25	16.6667
	4.34783	10	10	20.5263
	8.33333	13.75	11.4286	21.0526
	0	17.1429	30.3448	25
	0	35.7143	18.1818	18.1818
	5	41.1765	12.8205	12.5
	20	27.907	15.625	19.5238
	10	16	20	31.1111
	25	75	15.3846	12.5
	8.33333	18.1818	31.1111	10
	17.6471	23.8095	25	18.1818
	7.69231	23.5294	23.5294	14.2857
	0	15	30	20
	0	11.1111	25	16.6667
	0	12.1212	18.75	4.16667
	0	0	11.1111	21.1111
	2.08333	18.75	0	12.766
	0	16.6667	15.3846	9.375
	5.26316		0	17.1429
Figure 3-figure supplement 1M	HCT116	NCLX KO #33
	19.3142	24.3796
	19.0151	20.4326
	16.967	22.2964
	24.6285	22.1309
	20.6104	23.85
	21.8215	27.3545
	16.806	27.634
	14.4369	19.6937
	15.6528	20.6272
	23.4372	33.4722
	9.96566	13.8582
	10.1782	22.7107
Figure 3-figure supplement 1N			12 hr					24 hr
	HCT116	NCLX KO 33	HCT116 (mT)	NCLX KO #33 (mT)		HCT116	NCLX KO 33	HCT116 (mT)	NCLX KO #33 (mT)
	12.3543	23.3625	42.1043	30.9688		2.55745	28.894	16.6151	42.2204
	4.23286	17.9544	10.3207	42.9111		17.6476	31.7275	14.6857	52.2869
	5.94207	18.7555	27.9268	25.6547		19.7345	23.3402	41.6855	36.292
	6.59367	11.6302	18.9224	33.831		23.9932	29.9243	20.911	59.8642
	5.91308	9.68022	34.8276	34.851		20.0585	29.5481	35.5935	71.4419
	12.7001	13.0252	40.4257	34.4355		19.0826	38.1373	39.4858	54.5861
	6.24156	12.8701	17.9239	31.8835		22.8296	33.279	17.6006	53.6698
	10.4767	37.7912	15.0622	37.6635		1.8085	50.3441	17.1964	42.7939
	15.3166	20.1953	1.28874	35.0258		16.3465	24.5471	10.3029	42.1164
	1.50255	19.3449	48.8004	32.6324		21.5618	24.7104	47.1746	43.8929
	3.86878	19.0235	5.21635	54.2113		28.1864	19.8919	31.8599	100
	5.68031	12.0264	22.9324	37.3661		24.292	22.7403	41.2951	71.7642
	2.64982	11.7051	15.4073	51.3567		21.1014	26.6555	46.0654	100
	17.4004	11.1304	5.83274	48.694		27.0359	28.7187	49.009	100
	9.45565	17.6485	6.93104	35.9376		20.1315	27.1614	32.4404	82.7256
	20.805	18.6694	27.1153	36.7079		13.8682	20.5405	45.171	100
	17.5946	27.996	30.2222	46.9747		19.2692	41.7102	59.0823	46.4668
	19.2587	40.353	25.494	22.095		30.9785	76.9639	49.148	47.8544
	30.736	28.4275	41.5774	24.8021		37.4574	56.832	80.677	47.0229
	18.8996	31.458	20.7034	20.7476		79.6061	60.7854	37.6448	42.6913
	39.015	35.4682				61.8304	67.1641
	35.175	26.7894				68.8779	50.6546
	21.2653	50.7498				41.2347	100
	32.1955	21.7944				52.4434	37.6459
	18.0038	27.2291				27.8568	45.7948
	13.9617	27.2173				24.9332	23.9205
	12.9504	59.9931	--	--		27.6911	100	--	--
	19.8504	35.2834	--	--		29.994	59.4325	--	--
	25.1706	34.6278	--	--		33.6048	64.5911	--	--
	34.5573	43.4012	--	--		70	100	--	--
	26.2815	27.5832	--	--		48.081	50.4666	--	--
	42.2773	28.7479	--	--		73.8925	52.9482	--	--
	48.0132	56.0389	--	--		79	100	--	--
	33.2613	30.3055	--	--		47.0292	35.575	--	--
	25.9585	33.8808	--	--		44.0613	37.164	--	--
	38.2311	47.4188	--	--		76.9316	95.2545	--	--
										--	--	--	--
Figure 3-figure supplement 1O	DLD1	NCLX KO #6	NCLX KO #24	NCLX KO #32						--	--	--	--
	1	1.58884	1.87607	1.44667						--	--	--	--
	1	1.22571	1.56485	1.51139						--	--	--	--
	1	1.66239	1.61676	1.89639						--	--	--	--
										--	--	--	--
										--	--	--	--
Figure 3-figure supplement 1P, Q										--	--	--	--	MMP1					MMP9
										--	--	DLD1	NCLX KO #6	NCLX KO #24	NCLX KO #32		DLD1	NCLX KO #6	NCLX KO #24	NCLX KO #32
												1	2.13011	1.33572	1.24047		1	1.91585	1.81118	1.45655
												1	1.30347	1.39448	1.25234		1	1.9736	1.94092	2.07234
												1	1.40869	1.64144	1.2924		1	1.51034	1.56748	1.37522
												1	1.62445	1.83489	1.36698		1	1.43475	1.28672	1.27522
Figure 3-figure supplement 1R, S																				MMP1					MMP9
																			Scramble	shNCLX #2	shNCLX #3	shNCLX #2+3		Scramble	shNCLX #2	shNCLX #3	shNCLX #2+3
																			1	1.23855	1.2359	0.9969		1	1.71845	1.39176	1.5592
																			1	1.11432	1.14427	1.1512		1	1.67185	1.48631	1.60001
																			1	1.07528	1.09039	0.99721		1	1.54178	1.50805	1.48881
