# Supplementary material for: Dichotomous role of the human mitochondrial Na+/Ca2+/Li+ exchanger NCLX in colorectal cancer growth and metastasis
Source: eLife. 2020 Sep 11;9:e59686. doi: 10.7554/eLife.59686 (PMC7529464; doi:10.7554/eLife.59686)
Supplement: Figure 3—source data 1. [file elife-59686-fig3-data1.xlsx]

## Sheet: Figure 3
Figure 3A	Time	HCT116	NCLX KO #33	NCLX Ko #37	NCLX KO #59	SEM	SEM	SEM	SEM
	0	1	1	1	1	0	0	0	0
	24	3.07853	1.72174	1.57705	1.83931	0.41624	0.48482	0.18755	0.12811
	48	4.5797	2.00328	1.85787	2.45088	0.36185	0.47026	0.26491	0.25642
	72	5.97486	2.0641	1.88241	2.53763	0.85386	0.47332	0.26057	0.29149
	--	--	--	--	--	--	--	--	--
Figure 3B	Time	DLD1	SEM	NCLX KO #06	SEM	NCLX KO #24	SEM	NCLX KO #32	SEM
	0	1	0	1	0	1	0	1	0
	24	2.30754	0.22899	0.91446	0.07566	1.20192	0.07855	2.40415	0.13389
	48	6.52137	0.36985	2.05016	0.19079	1.93663	0.13794	5.32184	0.26228
	72	12.2177	0.95302	2.78566	0.68389	3.29448	0.88325	8.80929	0.1043
Figure 3D	HCT116	NCLX KO #33	NCLX KO #37	NCLX KO #59		--	--
	64.4253	100	72.013	86.1333		--	--									--	--		--
	57.7101	100	75.9301	88.1415		--
	55.0093	100	64.318	100		--
	57.3401	100	66.2656	100		--
	63.4703	100	80.3056	87.5946		--
	64.0481	100	92.2091	73.1658		--
	59.029	63.2544	58.6996	65.6107		--
	67.8507	62.5563	55.78	66.8209
	50.6345	73.3204	69.4324	78.243
	52.6369	70.2692	78.1977	77.9519
	39.998	70.0362	67.4649	77.9062
	42.7279	67.6792	63.1551	76.3827
Figure 3F		12 hr					24 hr
	Scramble	shNCLX #2	shNCLX #3	shNCLX #2+3		Scramble	shNCLX #2	shNCLX #3	shNCLX #2+3
	27.0714	42.8715	68.2002	45.006		49.1937	71.4276	100	79.5934
	22.7629	40.5446	60.1957	49.7766		37.5987	75.9195	100	80.2354
	49.7155	25.0105	64.1131	35.2565		83.5832	70.4171	100	64.0043
	54.8775	29.7179	63.4731	57.3199		88.4869	76.5564	100	86.8694
	36.989	34.9986	73.3197	37.1948		68.2045	62.5296	100	84.9256
	40.6358	39.616	66.2564	43.0604		61.6993	68.0672	100	81.9436
	26.9959	21.4786	67.7727	59.0019		55.7474	65.5118	100	100
	37.2683	23.2227	67.2133	49.9293		72.9539	73.1633	100	92.2611
	43.5326	69.671	63.6375	64.3336		78.5772	100	100	100
	34.6343	55.1944	66.7952	76.4387		50.361	100	100	100
	38.234	63.4299	48.0826	78.8529		55.4099	90.007	95.6796	100
	48.5077	54.68	63.0411	74.0732		78.7923	94.7156	100	100
	49.7019	49.3488	73.2486	42.7008		71.2721	79.2462	100	61.6988
	41.8876	40.8542	63.5819	38.3269		51.8931	76.8282	100	55.9147
	44.5528	52.8349	41.7035	47.6319		59.6385	76.9941	60.4372	90.5038
	32.059	47.9834	36.1195	42.3618		46.3888	76.0511	72.8596	80.4117
	34.9618	45.7569	40.2621	47.2632		48.3955	61.4787	72.7025	69.9714
	39.9845	44.6837	38.5604	46.4531		55.6135	64.6245	55.3179	71.271
	46.2737	55.2888	36.0428	37.7694		66.4871	85.6101	59.5931	53.5295
	38.8588	51.4945	65.1272	40.0808		52.6926	80.6602	89.6548	58.4256
	35.5782	47.2594	58.3173	46.3804		50.0359	69.5237	85.9525	64.4278
		46.7249	53.3851	42.8324			66.9828	77.6263	72.2822
			51.2389					79.8756
Figure 3H	HCT116	NCLX KO #33	NCLX KO #37	NCLX KO #59
	1	1.28847	1.68249	1.9602
	1	2.08031	1.28603	1.59643
	1	1.57012	1.49681	1.54391
Figure 3I-K			MMP1					MMP2					MMP9
	HCT116	NCLX KO #33	NCLX KO #37	NCLX KO #59		HCT116	NCLX KO #33	NCLX KO #37	NCLX KO #59		HCT116	NCLX KO #33	NCLX KO #37	NCLX KO #59
	1	2.42584	4.4966	1.34252	--	1	3.6206	3.88424	3.37528	--	1	1.77697	1.23694	0.62029
	1	3.10259	6.32609	1.66534	--	1	2.3076	7.00027	3.48008	--	1	1.24464	1.45286	0.32989
	1	2.08903	2.69783	1.94768	--	1	1.77101	2.2639	2.4047	--	1	1.59071	1.65499	0.49788
	1	2.23187	0.94214	1.01118		1	2.06068	1.15568	2.08509		1	1.42908	2.32639	1.24109
	1	2.41289	1.73563	1.12186		1	2.99097	1.82972	5.48367		1	1.37897	1.95066	1.01639
	1	2.61519	2.31074	1.6648		1	2.7302	1.88745	4.72011		1	1.48249	3.16673	1.60381
Figure 3L, M																								MMP1	MMP1		MMP2	MMP2		MMP9	MMP9
																								HCT116	NCLX KO		HCT116	NCLX KO		HCT116	NCLX KO
																								1	5.78539		1	1.82893
																								1	8.98689		1	1.44941		1	2.10579
																								1	2.54714		1	1.2469		1	1.59248
																								1	1.12837		1	1.41381		1	4.01946
																								1	1.85244		1	1.26484		1	2.95476
																											1	2.48991		1	5.44107
Figure 3N, O												MMP2					MMP9
											HCT116	NCLX KO #33	NCLX KO #37	NCLX KO #59		HCT116	NCLX KO #33	NCLX KO #37	NCLX KO #59
											1	1.14639	1.62557	1.67911		1	1.08847	1.00098	2.39583
											1	1.67767	1.5322	1.84411		1	2.33345	1.72859	2.9499
											1	1.24442	1.89024	1.43421		1	2.18842	1.48484	2.58724
											1	1.18148	1.18951	1.57451		1	1.64645	1.62542	1.73928
