# Supplementary material for: Dichotomous role of the human mitochondrial Na+/Ca2+/Li+ exchanger NCLX in colorectal cancer growth and metastasis
Source: eLife. 2020 Sep 11;9:e59686. doi: 10.7554/eLife.59686 (PMC7529464; doi:10.7554/eLife.59686)
Supplement: Figure 4—figure supplement 1—source data 1. [file elife-59686-fig4-figsupp1-data1.xlsx]

## Sheet: Figure 4_figure supplement_1
Figure 4-figure supplement 1B	Time	0	5	10	15	20	25	30	35	40	45	50	55	60	65	70	75.001	80.001	85.001	90.001	95.001	100.001	105.001	110.001	115.001	120.001	125.001	130.001	135.001	140.001	145.001	150.001	155.001	160.001	165.001	170.001	175.001	180.001	185.001	190.001	195.001	200.001	205.001	210.001	215.001	220.001	225.001	230.001	235.001
	HCT116	1	1.01341	0.98005	--	0.99162	0.9786	0.96624	0.96145	0.95632	0.99917	0.95349	0.95247	0.94667	0.93735	0.9426	0.95053	0.94105	0.95111	0.94432	0.94927	0.93973	0.93612	0.95541	0.93268	0.95446	1.01202	1.03958	1.06139	1.20937	1.34577	1.63689	1.89719	1.88707	1.87447	1.83872	1.81288	1.7619	1.77405	1.71865	1.67098	1.63837	1.61987	1.58678	1.57116	1.54686	1.51009	1.47797	1.45686
	SEM	0	0.01296	0.00702	0.10171	0.00855	0.0087	0.00753	0.00443	0.00441	0.03812	0.00607	0.00653	0.00672	0.00683	0.00993	0.01207	0.00756	0.00835	0.00809	0.00874	0.00843	0.00857	0.00909	0.00841	0.00945	0.01902	0.01839	0.01924	0.02189	0.02723	0.03163	0.04833	0.03909	0.03969	0.03903	0.04103	0.03917	0.04363	0.04246	0.03986	0.03964	0.04081	0.04051	0.04129	0.04102	0.03724	0.03569	0.03583
	NCLX KO #33	1	1.00008	0.98916	0.98486	0.98019	0.97853	0.97453	0.97897	0.96059	0.96889	0.96489	0.96456	0.96143	0.95204	0.94382	0.95241	0.95295	0.95068	0.93233	0.95451	0.95385	0.94191	0.94751	0.95255	1.06024	1.21508	1.32833	1.58876	1.66649	1.70716	1.85465	1.91701	1.92596	1.9523	1.95751	1.94932	1.92738	1.92865	1.89151	1.88601	1.88512	1.8479	1.86498	1.83351	1.80499	1.78066	1.76713	1.7361
	SEM	0	0.00234	0.00243	0.00262	0.00294	0.00367	0.00334	0.00412	0.00388	0.00441	0.00446	0.00529	0.00516	0.00471	0.0045	0.00487	0.00521	0.00548	0.00511	0.00589	0.00934	0.00587	0.00679	0.00905	0.02252	0.02938	0.03126	0.03306	0.03522	0.03554	0.03463	0.03789	0.03918	0.04086	0.04162	0.04152	0.04023	0.0422	0.03941	0.03979	0.04063	0.03894	0.04076	0.0402	0.03803	0.03741	0.0378	0.03651
Figure 4-figure supplement 1C	HCT116	0.02261	0.02808	0.05666	0.03983	0.03625	0.05638	0.04525	0.03043	0.04813	0.06015	0.03687	0.03448	0.02481	0.07886	0.04082	0.00777	0.04613	0.08216	0.06441	0.0626	0.07486	0.0593	0.03832	0.04242	0.08226	0.07498	0.04925	0.07224	0.08558	0.03133	0.03145	0.01185	0.07319	0.048	0.06783	0.0418	0.05389	0.05192	0.05086	0.00953	0.02201	0.0184	--	0.06207	0.07664	0.05533	0.04979	0.05387
	NCLX KO #33	0.02235	0.0491	0.03156	0.01181	0.01851	0.01135	0.02423	0.02022	0.0375	0.07554	0.04321	0.023	0.05187	0.06081	0.06505	0.04556	0.0309	0.03971	0.05941	0.07329	0.03481	0.04973	0.06066	0.06055	0.02561	0.02806	0.02394	0.03428	0.06248	0.0479	0.05769	0.0495	0.05375	0.04163	0.02081	0.02273	0.05193	0.03151	0.04226	0.02066	0.03953	0.04502	--	0.01832	0.01709	0.01053	0.00535	0.00588
Figure 4-figure supplement 1D	HCT116	-0.00432	-0.00653	-0.00788	-0.00691	-0.00726	-0.00722	-0.00973	-0.00836	-0.00874	-0.01346	-0.00536	-0.01116		-0.01971	-0.01422	-0.00551	-0.0186	-0.02613	-0.01311	-0.00768	-0.00989	-0.013	-0.00609	-0.00737	-0.00816	-0.00797	-0.01482	-0.02008	-0.00933	-0.01051	-0.01337	-0.0073	-0.02348	-0.00319	-0.01723	-0.01138	-0.01298	-0.01369	-0.01066	-0.00444	-0.01055	-0.00538	0.0023	-0.01544	-0.01289		-0.01368	-0.00845
	NCLX KO #33	-0.0102	-0.00803	-0.00308	-0.00233	-0.00563	-0.00272	-0.0037	-0.00118	-0.0062	-0.00711	0.00206	-0.000939123	-0.00681	-0.01101	-0.00435	-0.00406	-0.00111	-0.01251	-0.00958	-0.00863	-0.00201	-0.00341	-0.0108	0.00168	-0.00444	-0.01211	-0.00263	-0.00643	-0.00578	-0.01387	-0.00506	-0.00666	-0.01705	-0.01499	-0.00792	-0.00562	-0.0128	-0.00345	-0.00413	-0.00437	-0.0106	-0.0059	--	-0.00345	-0.0047	-0.00309	-0.00136	-0.0021
Figure 4-figure supplement 1F	Time	0	5.29	10.58	15.87	21.16	26.45	31.74	37.03	42.32	47.61	52.9	58.19	63.48	68.77	74.06	79.35	84.64	89.93	95.22	100.51	105.8	111.09	116.38	121.67	126.96	132.25	137.54	142.83	148.12	153.41	158.7	163.99	169.28	174.57	179.86	185.15	190.44	195.73	201.02	206.31	211.6	216.89	222.18	227.47	232.76	238.05	243.34	248.63
	DLD1	1	1.00229	0.99735	0.97895	0.96993	0.97601	0.9515	0.95353	0.9369	0.93923	0.91093	0.88627	0.90095	0.89987	0.88939	0.89645	0.88697	0.89403	0.89517	0.95408	0.90478	0.88712	0.85463	1.09661	1.4107	1.53404	1.67111	1.81348	1.83935	1.83802	1.88537	1.88821	1.89045	1.95728	1.8885	1.82282	1.74276	1.70498	1.628	1.59163	1.54182	1.50954	1.50777	1.49418	1.42615	1.4261	1.41422	1.3925
	SEM	0	0.00374	0.00482	0.00574	0.0047	0.00569	0.00723	0.00759	0.00789	0.01102	0.00985	0.01219	0.01132	0.01098	0.01162	0.01186	0.01271	0.01385	0.01564	0.02719	0.01942	0.02022	0.02485	0.03337	0.08732	0.11516	0.11985	0.1111	0.10955	0.10869	0.09275	0.08152	0.07629	0.08142	0.07716	0.07382	0.0734	0.0731	0.07363	0.07482	0.07791	0.07479	0.0768	0.07617	0.07677	0.07892	0.07859	0.07932
	NCLX KO #6	1	1.02119	0.99999	1.01144	1.03423	1.01151	1.01818	1.07238	1.03622	1.00538	1.00858	1.02445	0.99424	1.01317	1.00834	0.99093	1.00764	1.0074	0.98921	0.99456	0.98936	1.04075	1.04149	0.91324	1.0856	1.19124	1.43799	1.93681	2.1195	2.22608	2.26342	2.30541	2.27596	2.36712	2.32527	2.31184	2.29866	2.25039	2.27501	2.29963	2.22937	2.29158	2.21798	2.22586	2.20303	2.21188	2.17588	2.16176
	SEM	0	0.00495	0.00505	0.01165	0.01638	0.01757	0.01726	0.02192	0.01557	0.01185	0.00986	0.01047	0.01808	0.01499	0.01601	0.00928	0.00901	0.01402	0.00824	0.01211	0.00992	0.02148	0.01421	0.02105	0.03911	0.06345	0.07878	0.09432	0.09768	0.10352	0.10493	0.10959	0.10654	0.13016	0.12461	0.11978	0.12566	0.12125	0.1259	0.13639	0.12372	0.14564	0.12943	0.13368	0.13313	0.14084	0.13648	0.1375
Figure 4-figure supplement 1G	DLD1	0.000125686	0.02822	0.00161	0.0029	0.00041154	0.00534	0.0117	0.00324	0.00924	0.00279		0.00421			0.00844	0.00605	0.00344	0.01481	0.01069	0.00409	0.00216	0.00394	0.01704	--	-0.00392	-0.00181	-0.00554	-0.00244	-0.00229	-0.00332	-0.00319	0.00153	-0.00242	-0.00657	0.00107	-0.00292	-0.00226	--	0.06393	0.03196	0.0344	0.03126	0.02577	0.05634	0.03916	0.02648	0.06119	0.06642
	NCLX KO #6	0.01005	0.02001	0.02001	0.0048	0.01305	0.00514	0.02301	0.000744956	0.02037	0.00768	0.00938	0.00805	0.00476	0.000547535	0.000774926	0.01756	0.01015	0.03208	0.03196	0.00304	0.00798	--	0.02657	0.02287	0.01548	0.01251	0.00835	0.00902	0.00152	0.00178	0.02056	0.0042	0.01948	0.00878	0.00331	0.03368	0.02024	0.02132	0.000605059	0.01246	-0.00582	--	-0.00597	0.01286	0.00945	0.00449	-0.00273	0.0212
Figure 4-figure supplement 1H	DLD1	-0.00962	-0.00442	-0.00145	-0.00172	-0.016	-0.00844	-0.00445	-0.00137	-0.00282	-0.0185	-0.00204	-0.014	-0.00109	-0.00812	-0.000436706	-0.00111	-0.00213	-0.00149	-0.00133	-0.00269	-0.000344062	-0.00172	-0.00477	-0.00333	-0.00398	-0.00318	-0.00311	-0.00335	-0.0046	-0.000904725	-0.0032	-0.00252	--	-0.0162	-0.00997	-0.01056	-0.00863	-0.00857	-0.01457	-0.00998	-0.00647	-0.0127	-0.01545	-0.00836	-0.000257781	-0.00515	-0.00909	-0.01351
	NCLX KO #6	0.000290662	-0.000133792	-0.000207504	0.000433		-0.0037	-0.00577	-0.00309	-0.00128	-0.000512785	-0.00104	-0.00882	-0.00303	-0.00319	-0.000681005		0.00257	-0.00384	-0.00743	0.000376303	-0.00258	--	-0.00612	-0.00509	-0.00229	-0.00176	-0.00168	-0.0029	-0.00156	-0.000963319	-0.00836	-0.00166	-0.00711	-0.00307	0.000399756	-0.0068	-0.00455	-0.00564	-0.000562833	-0.00353	-0.000541024	--	0.000309598	-0.00152	-0.000231	-0.00152	-0.000343	-0.000186
Figure 4-figure supplement 1I	Time	0	5	10	15	20.001	25.001	30.001	35.001	40.001	45.001	50.001	55.001	60.001	65.001	70.001	75.001	80.001	85.001	90.001	95.001	100.001	105.001	110.001	115.001	120.001	125.001	130.001	135.001	140.001	145.001	150.001	155.001	160.001	165.001	170.001	175.001	180.001	185.001	190.001	195.001	200.001	205.001	210.001	215.001	220.001	225.001	230.001	235.001
	HCT116	1	0.99123	1.03676	0.99208	1.02152	1.02669	0.99079	0.99482	0.98039	0.9547	0.96052	0.93514	0.96108	0.95159	0.94015	0.916	0.93544	0.94811	0.96144	0.92052	0.9135	0.93766	0.96783	0.94156	0.98049	1.18347	1.23324	1.18892	1.40199	1.50547	1.47038	1.47005	1.59235	1.5841	1.53218	1.43565	1.37934	1.4171	1.34394	1.33299	1.2907	1.22981	1.17224	1.16275	1.14723	1.17592	1.14839	1.1232
	SEM	0	0.00712	0.01095	0.00859	0.01189	0.01333	0.00954	0.01103	0.01063	0.01135	0.01319	0.01007	0.01155	0.01371	0.00945	0.01044	0.01029	0.01153	0.01274	0.01329	0.01376	0.01517	0.01924	0.01682	0.01907	0.0994	0.07102	0.06792	0.05429	0.06828	0.05939	0.04422	0.05314	0.05601	0.05519	0.05079	0.04843	0.05521	0.0486	0.05529	0.05178	0.05062	0.04149	0.04434	0.04369	0.04745	0.04106	0.04532
	NCLX KO #37	1	0.97383	0.98388	0.96307	0.95582	0.95348	0.96711	0.94124	0.94657	0.94654	0.94874	0.94806	0.94272	0.93649	0.93569	0.93686	0.93971	0.93406	0.93379	0.9474	0.92452	0.93383	0.95216	0.96176	1.03593	1.50783	1.38949	1.55848	1.8518	1.93392	1.95599	1.95292	1.90025	1.88373	1.88562	1.88746	1.82859	1.83859	1.78092	1.76841	1.85205	1.83074	1.7836	1.84052	1.74597	1.71892	1.71345	1.76172
	SEM	0	0.00739	0.01026	0.01285	0.00862	0.0136	0.01038	0.01528	0.0054	0.01119	0.00672	0.01365	0.00998	0.00665	0.01986	0.01178	0.01399	0.00861	0.00936	0.01638	0.01135	0.01478	0.01424	0.01437	0.0222	0.10014	0.05636	0.05336	0.06714	0.06976	0.06546	0.06569	0.05783	0.0577	0.06296	0.06935	0.05887	0.06695	0.0612	0.06379	0.0892	0.08875	0.08037	0.10515	0.07813	0.08037	0.08429	0.10639
Figure 4-figure supplement 1J	Time	0	5	10	15	20.001	25.001	30.001	35.001	40.001	45.001	50.001	55.001	60.001	65.001	70.001	75.001	80.001	85.001	90.001	95.001	100.001	105.001	110.001	115.001	120.001	125.001	130.001	135.001	140.001	145.001	150.001	155.001	160.001	165.001	170.001	175.001	180.001	185.001	190.001	195.001	200.001	205.001	210.001	215.001	220.001	225.001	230.001	235.001
	HCT116	1	0.99092	0.98254	0.97909	0.96552	0.97066	0.95784	0.95365	0.94648	0.94539	0.9443	0.93898	0.93608	0.93327	0.93148	0.92775	0.92226	0.92123	0.91496	0.91598	0.91675	0.91615	0.91315	0.91703	0.90497	0.91757	1.06055	1.25173	1.41175	1.58055	1.72461	1.73407	1.72223	1.68916	1.66117	1.61007	1.57192	1.53877	1.50671	1.48961	1.46653	1.44116	1.41096	1.39783	1.37805	1.35574	1.33734	1.31225
	SEM	0	0.00304	0.00317	0.00336	0.00277	0.00356	0.00365	0.00346	0.00414	0.00448	0.00497	0.00603	0.00628	0.00606	0.00734	0.00817	0.00596	0.00616	0.00628	0.00563	0.00632	0.00673	0.00661	0.00667	0.00626	0.00801	0.03014	0.03638	0.04077	0.04992	0.07203	0.07554	0.07975	0.07393	0.07243	0.06902	0.06578	0.06511	0.06426	0.06545	0.06453	0.063	0.05806	0.05779	0.05717	0.05286	0.0554	0.05139
	NCLX KO #59	1	0.996	0.98321	0.98202	0.96942	0.96581	0.95907	0.95638	0.95174	0.94414	0.9393	0.94054	0.93987	0.92997	0.96161	0.95315	0.9412	0.94132	0.94118	0.93633	0.93453	0.93477	0.92963	0.92448	0.93761	0.94427	1.03494	1.20868	1.50977	1.60027	1.6274	1.65323	1.67561	1.66386	1.65508	1.64942	1.62924	1.62713	1.60023	1.59668	1.58566	1.5733	1.56043	1.54412	1.53038	1.52477	1.50425	1.49824
	SEM	0	0.00424	0.00238	0.00312	0.00359	0.00402	0.00396	0.00405	0.00463	0.00451	0.00488	0.00547	0.00529	0.00542	0.00597	0.00547	0.00614	0.00557	0.00601	0.00583	0.00639	0.00679	0.00632	0.00608	0.00702	0.00746	0.01641	0.02685	0.03467	0.04069	0.04455	0.0453	0.04636	0.04682	0.04743	0.04875	0.04956	0.05091	0.05014	0.04959	0.05036	0.05044	0.05081	0.05045	0.05076	0.05079	0.05045	0.05036
Figure 4-figure supplement 1K	Time	0	5.29	10.58	15.87	21.16	26.45	31.74	37.03	42.32	47.61	52.9	58.19	63.48	68.77	74.06	79.35	84.64	89.93	95.22	100.51	105.8	111.09	116.38	121.67	126.96	132.25	137.54	142.83	148.12	153.41	158.7	163.99	169.28	174.57	179.86	185.15	190.44	195.73	201.02	206.31	211.6	216.89	222.18	227.47	232.76	238.05	243.34	248.63
	DLD1	1	1.00294	0.99715	0.98316	0.97971	0.98618	0.95748	0.96293	0.95161	0.95286	0.93238	0.92839	0.9308	0.93173	0.92112	0.92479	0.91856	0.92795	0.93127	0.94956	0.92668	0.91691	0.89707	1.01684	1.2065	1.28685	1.43297	1.60047	1.65184	1.68503	1.72115	1.71873	1.71895	1.75081	1.71121	1.67614	1.63476	1.61379	1.57214	1.55555	1.53529	1.51397	1.51655	1.50507	1.46836	1.4698	1.46077	1.45187
	SEM	0	0.00271	0.00328	0.00383	0.00353	0.00398	0.00459	0.00467	0.00533	0.0066	0.00657	0.00804	0.00749	0.00744	0.00806	0.00818	0.00864	0.00935	0.01016	0.0136	0.01171	0.01226	0.0147	0.0198	0.04986	0.0652	0.06945	0.06728	0.06724	0.06689	0.06119	0.05741	0.05581	0.05851	0.0567	0.05591	0.05544	0.05534	0.05535	0.05657	0.05853	0.05665	0.05745	0.05692	0.05712	0.05804	0.05788	0.05837
	NCLX KO #24	1	0.99584	0.9944	0.9921	0.98902	0.98418	0.98761	0.98865	0.98394	0.98889	0.97842	0.98033	0.98186	0.99036	0.98867	0.98616	0.98695	0.985	0.98802	0.98622	0.98933	0.99162	0.98079	0.94753	1.18733	1.40572	1.53711	1.60192	1.63153	1.66123	1.66489	1.68158	1.67524	1.67932	1.66145	1.67453	1.66926	1.66597	1.67219	1.6698	1.67356	1.67801	1.67686	1.6737	1.66792	1.67252	1.66949	1.66192
	SEM	0	0.00282	0.00403	0.00447	0.00485	0.00507	0.00557	0.00602	0.00698	0.00698	0.00719	0.00815	0.01012	0.01081	0.01137	0.0117	0.01244	0.01194	0.01234	0.01228	0.013	0.01256	0.01401	0.01211	0.03636	0.05378	0.06391	0.06832	0.07239	0.07447	0.07913	0.0828	0.08413	0.08515	0.08435	0.08529	0.08761	0.08645	0.08829	0.08744	0.09006	0.08925	0.09121	0.09104	0.09071	0.09166	0.09063	0.0911
Figure 4-figure supplement 1L	Time	0	5.29	10.58	15.87	21.16	26.45	31.74	37.03	42.32	47.61	52.9	58.19	63.48	68.77	74.06	79.35	84.64	89.93	95.22	100.51	105.8	111.09	116.38	121.67	126.96	132.25	137.54	142.83	148.12	153.41	158.7	163.99	169.28	174.57	179.86	185.15	190.44	195.73	201.02	206.31	211.6	216.89	222.18	227.47	232.76	238.05	243.34	248.63
	DLD1	1	1.00081	0.99723	0.98791	0.98213	0.98304	0.96544	0.96395	0.95761	0.95796	0.943	0.94165	0.93994	0.93826	0.92537	0.9304	0.92497	0.92878	0.92787	0.94058	0.92293	0.91551	0.90298	0.97303	1.09047	1.13535	1.25233	1.4299	1.52149	1.56654	1.59385	1.58694	1.58034	1.59068	1.56202	1.53781	1.50434	1.48598	1.45785	1.44293	1.42847	1.4139	1.40999	1.39995	1.37431	1.37732	1.36522	1.35861
	SEM	0	0.00192	0.00231	0.00267	0.00261	0.00298	0.00338	0.00341	0.00397	0.00462	0.00485	0.00565	0.00541	0.00529	0.00566	0.00586	0.00627	0.00649	0.00703	0.00906	0.00803	0.0084	0.00985	0.01338	0.03275	0.04282	0.04718	0.04752	0.048	0.0477	0.04486	0.04287	0.04229	0.0441	0.04295	0.04221	0.04159	0.04142	0.04114	0.04169	0.04239	0.04151	0.04191	0.04142	0.04108	0.04196	0.04161	0.04177
	NCLX KO #32	1	1.00781	0.99214	0.99708	0.98187	0.97925	0.98048	0.98192	0.96614	0.9665	0.95477	0.9488	0.93985	0.94455	0.93107	0.93028	0.92897	0.92932	0.92687	0.92848	0.9214	0.92317	0.92055	0.91813	0.95962	1.07447	1.45171	1.64512	1.72538	1.75515	1.79633	1.78413	1.7682	1.77625	1.81312	1.78634	1.79861	1.77741	1.76053	1.75089	1.77115	1.76209	1.78343	1.7716	1.77651	1.77245	1.7856	1.80403
	SEM	0	0.00364	0.00628	0.00875	0.00919	0.00843	0.00933	0.00931	0.00903	0.00832	0.0085	0.00862	0.00845	0.00872	0.00901	0.00933	0.00949	0.00993	0.01036	0.01194	0.01081	0.01131	0.01093	0.01153	0.0213	0.03066	0.0593	0.06838	0.07092	0.0705	0.0813	0.08051	0.08312	0.0874	0.09091	0.09148	0.09366	0.09117	0.09174	0.09172	0.09638	0.09455	0.09578	0.10101	0.09889	0.09943	0.10163	0.10537
Figure 4-figure supplement 1M	Scramble HCT116	siNCLX	scramble DLD1	siNCLX	scramble HT29	siNCLX
	1	0.36815	1	0.46383	1	0.62729
	1	0.59558	1	0.21418	1	0.45296
	1	0.13524	1	0.46487	1	0.39019
	1	0.44822	1	0.31273	1	0.29261
Figure 4-figure supplement 1N	Time	2.1964	6.5732	10.9768	15.3342	19.7016	24.0897	28.4622	32.825	37.2122	41.5999	45.9619	50.33	54.6938	59.0847	63.4531	67.8004	72.1478	76.536	80.9325	85.3061	89.6839	94.0711	98.4334	102.826	107.224	111.596	115.969	120.347	124.71	129.071	133.464	137.831	142.189	146.582	150.974	155.332	159.679	164.056	168.434	172.771	177.119	181.496	185.895	190.266	194.643	199.006	203.348	207.721
	Scramble HCT116	0.90361	0.90343	0.90396	0.90285	0.90403	0.90357	0.90404	0.90418	0.90419	0.90299	0.90403	0.90275	0.9033	0.90352	0.90432	0.90478	0.90558	0.90225	0.90416	0.90335	0.90462	0.97303	1.14431	1.52931	1.92636	2.19074	2.45215	2.48987	2.48363	2.46426	2.42483	2.37888	2.32529	2.26879	2.20985	2.14983	2.09428	2.04322	1.99295	1.9493	1.90707	1.86744	1.8304	1.79638	1.76509	1.73344	1.70749	1.6816
	SEM	0.01279	0.01284	0.0129	0.01274	0.01287	0.01284	0.01267	0.01311	0.01298	0.01313	0.01326	0.01296	0.01324	0.0133	0.01326	0.01338	0.01333	0.01325	0.01343	0.01328	0.01339	0.0141	0.03674	0.07952	0.12372	0.14673	0.13699	0.14193	0.14261	0.14081	0.13733	0.13205	0.12578	0.11903	0.11291	0.10628	0.10015	0.09499	0.0897	0.08573	0.0821	0.07842	0.07514	0.07255	0.07018	0.06781	0.06562	0.06399
	siNCLX	0.93727	0.93528	0.93282	0.93165	0.93023	0.92746	0.92561	0.92355	0.92271	0.91936	0.91707	0.91398	0.91227	0.91133	0.91028	0.90863	0.90825	0.90718	0.90666	0.90675	0.93736	1.0171	1.17844	1.36533	1.60084	1.76278	1.86204	1.93401	1.9863	2.02548	2.05872	2.08414	2.10388	2.12296	2.1286	2.13736	2.14427	2.15146	2.15128	2.15198	2.14927	2.14568	2.13943	2.13222	2.12529	2.11459	2.10469	2.0966
	SEM	0.00987	0.00992	0.00972	0.00969	0.00977	0.00967	0.00955	0.00955	0.00963	0.00922	0.00916	0.00897	0.00897	0.00907	0.00919	0.00905	0.00906	0.00891	0.00913	0.00952	0.01079	0.01923	0.03482	0.05685	0.06158	0.06764	0.07613	0.08226	0.08657	0.09041	0.09362	0.09653	0.09913	0.10118	0.10231	0.10393	0.10526	0.10707	0.10753	0.10827	0.10861	0.10917	0.10895	0.10874	0.10875	0.10834	0.10832	0.10791
Figure 4-figure supplement 1O	Scramble HCT116	1.48142	2.09803	1.72886	1.70378	1.45774	1.66205	1.32188	1.54833	2.11169	2.61377	2.58642	2.68999	2.12439	2.51831	2.16479	1.3852	1.73529	1.37469	1.48752	1.1678	1.15815	1.23588	1.24432	2.21185	2.34152	2.42338	2.28168	2.19844	2.15243	2.06566	0.45794	0.46217	0.34435	0.29802	0.40374	0.30378	0.26916	0.31609	0.25624	0.36896	0.35568	0.50937	0.34194	0.33319	0.37576	0.34801	0.18864	0.46522
	siNCLX	1.74476	1.28891	2.09329	1.65547	1.32835	1.10258	1.31977	1.24473	2.09405	2.02196	2.2761	1.68755	1.84288	1.70997	1.7456	1.34799	1.05686	1.76568	0.78442	0.76273	0.75945	0.75928	1.50664	1.46411	1.77834	1.71174	1.02917	1.30656	1.40528	0.33112	0.31027	0.20298	0.32849	0.40134	0.15444	0.36355	0.52531
Figure 4-figure supplement 1P	Scramble HCT116	-0.00837	-0.01268	-0.00977	-0.01017	-0.00651	-0.00751	-0.00601	-0.00745	-0.00943	-0.01263	-0.01315	-0.01621	-0.01011	-0.01209	-0.01059	-0.00689	-0.00928	-0.00753	-0.0081	-0.00661	-0.00577	-0.00547	-0.0051	-0.01299	-0.01291	-0.01458	-0.01187	-0.01235	-0.01205	-0.01214	-0.00216	-0.00218	-0.00201	-0.00194	-0.00218	-0.00147	-0.00312	-0.00262	-0.0026	-0.0029	-0.00344	-0.00359	-0.00235	-0.00295	-0.00329	-0.00315	-0.00223	-0.00246
	siNCLX	-0.00206	-0.000594737	-0.00261	-0.00217	0.000566407	0.000552002	-0.000388106	-0.000149286	-0.00226	-0.00285	-0.00386	-0.0022	-0.00182	-0.00239	-0.00259	-0.00138	-0.00119	-0.00394	3.16253e-05	0.000135348	-0.000263147	-0.000360443	-0.000769514	-0.00116	-0.00177	-0.00492	-0.00138	-0.00229	-0.00295	-0.00245	-0.0023	-0.00168	-0.00272	-0.00328	-0.000894105	-0.00264	-0.00329
Figure 4-figure supplement 1Q	Time	2.1964	6.5732	10.9768	15.3342	19.7016	24.0897	28.4622	32.825	37.2122	41.5999	45.9619	50.33	54.6938	59.0847	63.4531	67.8004	72.1478	76.536	80.9325	85.3061	89.6839	94.0711	98.4334	102.826	107.224	111.596	115.969	120.347	124.71	129.071	133.464	137.831	142.189	146.582	150.974	155.332	159.679	164.056	168.434	172.771	177.119	181.496	185.895	190.266	194.643	199.006	203.348	207.721
	Scramble DLD1	0.9031	0.90202	0.90245	0.90217	0.90167	0.90161	0.90116	0.90083	0.90092	0.90099	0.90144	0.90116	0.9035	0.90333	0.90356	0.90241	0.90059	0.89834	0.89702	0.8974	0.89916	0.89033	0.97816	1.2322	1.68978	2.15126	2.43544	2.60867	2.71613	2.77811	2.80368	2.81705	2.8177	2.81769	2.80172	2.77792	2.74094	2.69695	2.64427	2.59316	2.53835	2.48152	2.42501	2.36184	2.30128	2.23682	2.17713	2.11755
	SEM	0.00856	0.00836	0.00811	0.0078	0.00796	0.00801	0.0083	0.00832	0.00836	0.0082	0.00806	0.00825	0.00823	0.00824	0.00865	0.0085	0.00871	0.00783	0.00769	0.00732	0.00767	0.00766	0.01056	0.02295	0.04831	0.07195	0.08176	0.08991	0.09645	0.09969	0.10179	0.10173	0.10326	0.10427	0.10639	0.10723	0.1052	0.10129	0.09727	0.09542	0.0922	0.09011	0.08776	0.08606	0.08407	0.08172	0.08086	0.0794
	siNCLX	0.90135	0.90206	0.89992	0.89747	0.89693	0.89706	0.89672	0.89612	0.89655	0.89784	0.89798	0.89677	0.89487	0.89327	0.89419	0.89439	0.89424	0.89266	0.89276	0.89242	0.8929	0.88597	0.97678	1.22774	1.65183	2.04226	2.25023	2.3732	2.44591	2.48656	2.51122	2.52284	2.52862	2.52536	2.51809	2.50663	2.48871	2.46718	2.44489	2.4163	2.39194	2.36573	2.34187	2.31572	2.29105	2.26774	2.23721	2.21303
	SEM	0.00921	0.0093	0.00947	0.00918	0.00912	0.00909	0.00948	0.00934	0.00937	0.00891	0.00892	0.00899	0.00939	0.00972	0.00939	0.00915	0.00888	0.00938	0.0091	0.00942	0.00924	0.00923	0.01025	0.02317	0.05384	0.08025	0.09184	0.09833	0.1025	0.10222	0.1051	0.10602	0.10968	0.11	0.111	0.11181	0.11206	0.11059	0.10991	0.1087	0.10822	0.10622	0.10427	0.10269	0.10151	0.09988	0.09804	0.0969
Figure 4-figure supplement 1R	Scramble DLD1	2.14541	2.08011	1.99755	1.83798	0.98323	1.36274	1.63424	1.40773	2.55433	1.99755	2.00702	2.14541	1.97467	1.63424	1.40773	2.00702
	siNCLX	2.15737	2.06162	1.62814	1.31698	1.29925	0.74067	1.20673	1.01768	2.1047	1.70785	1.20673	1.89119	2.1047	1.70785	1.63363	1.01768	1.55017
Figure 4-figure supplement 1S	Scramble DLD1	-0.01672	-0.01185	-0.01291	-0.0147	-0.00792	-0.00833	-0.01246	-0.0088	-0.01339	-0.01291	-0.0151	-0.01672	-0.01129	-0.01246	-0.0088	-0.0151
	siNCLX	-0.00864	-0.00823	-0.00387	-0.00449	-0.00353	-0.00405	-0.00235	-0.00542	-0.00894	-0.00463	-0.00235	-0.00735	-0.00894	-0.00463	-0.00514	-0.00542
Figure 4-figure supplement 1T	Time	0	4.867	9.821	14.775	19.729	24.681	29.632	34.589	39.542	44.494	49.443	54.39	59.349	64.296	69.251	74.199	79.157	84.109	89.062	94.015	98.968	103.921	108.874	113.829	118.777	123.732	128.686	133.639	138.592	143.545	148.498	153.452	158.405	163.357	168.31	173.264	178.216	183.17	188.122	193.075	198.029	202.981	207.929	212.887	217.842	222.793	227.747	232.699
	Scramble HT29	0.65401	0.65596	0.65183	0.64942	0.64632	0.64551	0.64359	0.64258	0.64037	0.63775	0.63771	0.63567	0.63506	0.63378	0.63335	0.63071	0.63106	0.63285	0.63428	0.63056	0.77438	0.93191	1.01893	1.07257	1.11325	1.14197	1.15898	1.17238	1.18306	1.18663	1.19103	1.18734	1.18508	1.18118	1.1734	1.16514	1.1544	1.14045	1.1277	1.11017	1.09178	1.07718	1.05628	1.03544	1.01862	0.99938	0.98038	0.96301
	SEM	0.04018	0.04074	0.04066	0.04089	0.04102	0.04123	0.04153	0.0416	0.04174	0.04174	0.04215	0.04234	0.04281	0.04311	0.04293	0.04305	0.04372	0.04323	0.04363	0.04338	0.03719	0.05286	0.067	0.07713	0.08362	0.0901	0.09545	0.10019	0.10408	0.10635	0.10883	0.10947	0.11045	0.11105	0.11072	0.11059	0.11016	0.10894	0.1084	0.10681	0.10522	0.10411	0.10238	0.10012	0.09877	0.09683	0.09485	0.09322
	siNCLX	0.69747	0.69709	0.69699	0.69568	0.69489	0.69359	0.69327	0.69295	0.69342	0.69137	0.68958	0.68779	0.68907	0.68992	0.69059	0.69111	0.69032	0.69006	0.68428	0.69863	0.79538	1.03733	1.21141	1.30461	1.35595	1.38497	1.40065	1.41003	1.41603	1.42255	1.42655	1.42831	1.43075	1.43444	1.43774	1.44066	1.44268	1.4455	1.44801	1.45129	1.45341	1.45369	1.45465	1.4543	1.45414	1.45271	1.45337	1.4522
	SEM	0.05018	0.05012	0.05001	0.04976	0.0498	0.04973	0.05001	0.05023	0.05032	0.05013	0.05	0.04981	0.05019	0.05048	0.05053	0.05058	0.05036	0.05036	0.04928	0.05163	0.06205	0.07096	0.09391	0.10838	0.11625	0.1203	0.12292	0.12469	0.12602	0.1273	0.12854	0.12923	0.13015	0.13134	0.13285	0.13397	0.13455	0.13545	0.13643	0.1376	0.13853	0.1396	0.14029	0.14094	0.14124	0.1419	0.14261	0.14341
Figure 4-figure supplement 1U	Scramble HT29	0.44098	0.34562	0.20905	0.36618	0.37308	0.47398	0.2275	0.30634	0.21188	0.23149	0.37048	0.2373	0.44769	0.35536
	siNCLX	0.29585	0.47218	0.53988	0.453	0.17916	0.16518	0.26198	0.33817
Figure 4-figure supplement 1V	Scramble	-0.00244	-0.00196	-0.000463919	-0.00207	-0.00121	-0.00338	-0.00178	-0.00218	-0.00128	-0.00117	-0.00229	-0.00127	-0.00144	-0.0014
	siNCLX	-0.00062336	-0.000579953	-0.000991591	-0.000729804	-0.000535187	-0.000535944	-0.000708115	-0.000671993
Figure 4-figure supplement 1W	Time	0.002	0.037	0.07067	0.10417	0.13767	0.17117	0.20467	0.23833	0.27183	0.30533	0.33883	0.3725	0.406	0.4395	0.473	0.50667	0.54017	0.57367	0.60717	0.64083	0.67433	0.70783	0.74133	0.775	0.8085	0.842	0.8755	0.909	0.94267	0.97617	1.00967	1.04333	1.07683	1.11033	1.14383	1.17733	1.211	1.2445	1.278	1.3115	1.34517	1.37867	1.41217	1.44567	1.47933	1.51283	1.54633	1.57983
	HCT116	1.21448	1.21802	1.21958	1.22358	1.22393	1.20703	1.216	1.21687	1.23471	1.2161	1.22	1.20652	1.21696	1.22534	1.22242	1.22045	1.21323	1.21008	1.21791	1.21174	1.21462	1.20431	1.21837	1.22483	1.20417	1.20983	1.21203	1.20563	1.21072	1.23112	1.21815	1.20417	1.20692	1.20627	1.19838	1.17623	1.1909	1.18373	1.18944	1.19322	1.18022	1.17175	1.18521	1.16408	1.16759	1.18931	1.18369	1.16082
	SEM	0.01331	0.01372	0.0131	0.01327	0.01226	0.01234	0.01222	0.01224	0.01439	0.01424	0.01225	0.01338	0.01268	0.01258	0.01309	0.0116	0.01263	0.01184	0.01135	0.01248	0.01447	0.01114	0.01174	0.01162	0.0117	0.01196	0.01128	0.0123	0.01206	0.01333	0.01261	0.01251	0.01241	0.01254	0.0126	0.01088	0.01103	0.00996	0.0099	0.01085	0.01008	0.00937	0.00817	0.00878	0.00812	0.00986	0.00837	0.00897
	NCLX KO #33	1.13264	1.12298	1.12984	1.13438	1.13454	1.13929	1.12528	1.13393	1.14503	1.12657	1.12225	1.13334	1.13182	1.1326	1.12394	1.12829	1.13279	1.12962	1.12337	1.12537	1.12572	1.12616	1.12749	1.13206	1.12611	1.14073	1.13535	1.13513	1.12203	1.13313	1.14111	1.13962	1.12836	1.14366	1.12172	1.12639	1.12497	1.11864	1.12323	1.13208	1.13447	1.13686	1.13316	1.13498	1.12597	1.12625	1.13409	1.1264
	SEM	0.00607	0.00757	0.00632	0.00604	0.00597	0.00518	0.00551	0.00591	0.00581	0.00528	0.00578	0.00604	0.00592	0.00621	0.00542	0.00517	0.00535	0.00536	0.0058	0.00539	0.00513	0.00534	0.00431	0.00474	0.00516	0.00478	0.00523	0.00495	0.00454	0.00512	0.00565	0.00515	0.00573	0.00545	0.00578	0.00612	0.00486	0.00519	0.00521	0.00519	0.00526	0.00559	0.00521	0.00566	0.00489	0.00484	0.00512	0.00529
Figure 4-figure supplement 1X	HCT116	0.17921	0.6746	0.30714	0.10101	0.38095	0.22222	0.03502	0.05556	0.09188	0.38889	0.31547	0.08889	1.1769	0.08333	0.74603	0.05714	0.13889	0.29315	0.25731	0.09344	0.50958	1.30065	0.45714	0.44006	0.84026	0.43728	0.12637	0.14976	0.12573	-0.00986	0.88571	0.38413	0.49047	1.80556	2.05556	1.72917	1.36257	1.57639	1.59444	1.71007	2.01389	1.82046	1.49747	1.50427	1.019	1.46111	1.66666	1.73504
	NCLX KO #33	0.22222	0.3	0.42857	0.4	0.33333	0.22222	0.2	0.15	0.15	0.80909	0.1	0	0.23333	0.025	0.4	0.01111	0.56667	0.13889	0.01111	0.23333	0.15	0.15	0.12222	0.15	0.34444	0.34444	0.23333	0.45556	0.23333	0.3	0.80909	0.2	0.2	0.3	0.35455	0.23333	0.23333	0.48333	0.12222	0.2	0.67778	0.775	0.67778	0.45556	0.01111	0.5	0.275	0.275
					--	--
					--	--
				--	--	--	--	--
				--	--	--	--	--
				--	--	--	--	--
				--	--	--	--	--
				--	--	--	--	--
				--	--	--	--	--
				--	--	--	--	--
				--	--	--	--	--
				--	--	--	--	--
				--	--	--	--	--
				--	--	--	--	--
				--	--	--	--	--
				--	--	--	--	--
				--	--	--	--	--
				--	--	--	--	--
				--	--	--	--	--
				--	--	--	--	--
				--	--	--	--	--
				--	--	--
				--	--	--
				--	--	--
				--	--	--
				--	--	--
				--	--	--
				--	--	--
				--	--	--
				--	--	--
				--	--	--
				--	--	--
				--	--	--
				--	--	--
				--	--	--
				--	--	--
				--	--	--
				--	--	--
				--	--	--
				--	--	--
				--	--	--
				--	--	--
				--	--	--
				--	--	--
				--	--	--
				--	--	--
				--	--	--
				--	--	--
				--	--	--
				--	--	--
				--	--	--
				--	--	--
				--	--	--
				--	--	--
				--	--	--
				--	--	--
				--	--	--
				--	--	--
				--	--	--
				--	--	--
				--	--	--
				--	--	--
				--	--	--
				--	--	--
				--	--	--
				--	--	--
				--	--	--
				--	--	--
				--	--	--
				--	--	--
				--	--	--
				--	--	--
				--	--	--
				--	--	--
				--	--	--
				--	--	--
				--	--	--
				--	--	--
				--	--	--
				--	--	--
				--	--	--
				--	--	--
				--	--	--
				--	--	--
				--	--	--
				--	--	--
				--	--	--
				--	--	--
				--	--	--
				--	--	--
				--	--	--
					--	--
					--	--
					--	--
					--	--
					--	--
					--	--
					--	--
					--	--
					--	--
					--	--
					--	--
					--	--
					--	--
					--	--
					--	--
					--	--
					--	--
					--	--
					--	--
					--	--
					--	--
					--	--
					--	--
					--	--
					--	--
					--	--
					--	--
					--	--
					--	--
					--	--
					--	--
					--	--
					--	--
					--	--
					--	--
					--	--
					--	--
					--	--
					--	--
					--	--
					--	--
					--	--
					--	--
					--	--
					--	--
					--	--
					--	--
					--	--
					--	--
					--	--
					--	--
					--	--
					--	--
					--	--
					--	--
					--	--
					--	--
					--	--
					--	--
					--	--
					--	--
					--	--
					--	--
					--	--
					--	--
					--	--
					--	--
					--	--
					--	--
					--	--
					--	--
					--	--
					--	--
					--	--
					--	--
					--	--
					--	--
					--	--
					--	--
					--	--
					--	--
					--	--
					--	--
					--	--
					--	--
					--	--
					--	--
					--	--
					--	--
					--	--
					--	--
					--	--
					--	--
					--	--
					--	--
					--	--
					--	--
					--	--
					--	--
					--	--
					--	--
					--	--
					--	--
					--	--
					--	--
					--	--
					--	--
					--	--
					--	--
					--	--
					--	--
					--	--
					--	--
					--	--
					--	--
					--	--
					--	--
					--	--
					--	--
					--	--
					--	--
					--	--
					--	--
					--	--
					--	--
					--	--
					--	--
					--	--
					--	--
					--	--
					--	--
					--	--
					--	--
					--	--
					--	--
					--	--
					--	--
					--	--
					--	--
					--	--
					--	--
					--	--
					--	--
					--	--
					--	--
					--	--
					--	--
					--	--
					--	--
					--	--
					--	--
					--	--
					--	--
					--	--
					--	--
					--	--
					--	--
					--	--
					--	--
					--	--
					--	--
					--	--
					--	--
					--	--
					--	--
					--	--
					--	--
					--	--
					--	--
					--	--
					--	--
					--	--
					--	--
					--	--
					--	--
					--	--
					--	--
					--	--
					--	--
					--	--
					--	--
					--	--
					--	--
					--	--
					--	--
					--	--
					--	--
					--	--
					--	--
					--	--
					--	--
					--	--
					--	--
					--	--
					--	--
					--	--
					--	--
					--	--
					--	--
					--	--
					--	--
					--	--
					--	--
					--	--
					--	--
					--	--
					--	--
					--	--
					--	--
					--	--
					--	--
					--	--
					--	--
					--	--
					--	--
					--	--
					--	--
					--	--
					--	--
					--	--
					--	--
					--	--
					--	--
					--	--
					--	--
					--	--
					--	--
					--	--
					--	--
					--	--
					--	--
					--	--
					--	--
					--	--
					--	--
					--	--
					--	--
					--	--
					--	--
					--	--
					--	--
					--	--
					--	--
					--	--
					--	--
					--	--
					--	--
					--	--
					--	--
					--	--
					--	--
					--	--
					--	--
					--	--
					--	--
					--	--
					--	--
					--	--
					--	--
					--	--
					--	--
					--	--
					--	--
					--	--
					--	--
					--	--
					--	--
					--	--
					--	--
					--	--
					--	--
					--	--
					--	--
					--	--
					--	--
					--	--
					--	--
					--	--
					--	--
					--	--
					--	--
					--	--
					--	--
					--	--
					--	--
					--	--
					--	--
					--	--
					--	--
					--	--
					--	--
					--	--
					--	--
					--	--
					--	--
					--	--
					--	--
					--	--
					--	--
					--	--
					--	--
					--	--
					--	--
					--	--
					--	--
					--	--
					--	--
					--	--
					--	--
					--	--
					--	--
					--	--
					--	--
					--	--
					--	--
					--	--
					--	--
					--	--
					--	--
					--	--
					--	--
					--	--
					--	--
					--	--
					--	--
					--	--
					--	--
					--	--
					--	--
					--	--
					--	--
					--	--
					--	--
					--	--
					--	--
					--	--
					--	--
					--	--
					--	--
					--	--
					--	--
					--	--
					--	--
					--	--
					--	--
					--	--
					--	--
					--	--
					--	--
					--	--
					--	--
					--	--
					--	--
					--	--
					--	--
					--	--
					--	--
					--	--
					--	--
					--	--
					--	--
					--	--
					--	--
					--	--
					--	--
					--	--
					--	--
					--	--
					--	--
					--	--
					--	--
					--	--
					--	--
					--	--
					--	--
					--	--
					--	--
					--	--
					--	--
					--	--
					--	--
					--	--
					--	--
					--	--
					--	--
					--	--
					--	--
					--	--
					--	--
					--	--
					--	--
					--	--
					--	--
					--	--
					--	--
					--	--
					--	--
					--	--
					--	--
					--	--
					--	--
					--	--
					--	--
					--	--
					--	--
					--	--
					--	--
					--	--
					--	--
					--	--
					--	--
					--	--
					--	--
					--	--
					--	--
					--	--
					--	--
					--	--
					--	--
					--	--
					--	--
					--	--
					--	--
					--	--
					--	--
					--	--
					--	--
					--	--
					--	--
					--	--
					--	--
					--	--
					--	--
					--	--
					--	--
					--	--
					--	--
					--	--
					--	--
					--	--
					--	--
					--	--
					--	--
					--	--
					--	--
					--	--
					--	--
					--	--
					--	--
					--	--
					--	--
					--	--
					--	--
					--	--
					--	--
					--	--
					--	--
					--	--
					--	--
					--	--
					--	--
					--	--
					--	--
					--	--
					--	--
					--	--
					--	--
					--	--
					--	--
					--	--
					--	--
					--	--
					--	--
					--	--
					--	--
					--	--
					--	--
					--	--
					--	--
					--	--
					--	--
					--	--
					--	--
					--	--
					--	--
					--	--
					--	--
					--	--
					--	--
					--	--
					--	--
					--	--
					--	--
					--	--
					--	--
					--	--
					--	--
					--	--
					--	--
					--	--
[truncated: 423 more columns]
