# Supplementary material for: Dichotomous role of the human mitochondrial Na+/Ca2+/Li+ exchanger NCLX in colorectal cancer growth and metastasis
Source: eLife. 2020 Sep 11;9:e59686. doi: 10.7554/eLife.59686 (PMC7529464; doi:10.7554/eLife.59686)
Supplement: Figure 4—figure supplement 1—source data 2. [file elife-59686-fig4-figsupp1-data2.xlsx]

## Sheet: Figure 4_figure supplement_2
Figure 4-figure supplement 2D,E	HCT116	NCLX KO #33	NCLX KO #37	NCLX KO #59		HCT116	NCLX KO #33	NCLX KO #37	NCLX KO #59
	0	2	0	4		0	0	1	0
	0	3	4	0		0	0	0	1
	0	3	0	4		0	0	0	1
	1	4	3	2		0	0	2	0
	1	2	2	1		0	0	0	0
	1	4	0	0		0	0	0	0
	0	0	4	5		0	0	0	1
	0	3	0	2		0	3	1	0
	0	2	4	0		0	0	0	1
	1	4	0	5		0	0	0	0
	0	0	5	2		0	0	0	0
	2	3	2	2		0	1	1	0
	1	0	0	3		0	1	0	0
	0	3	0	3		0	0	1	0
	0	4	3	0		0	0	0	1
	1	0	2	0		0	1	0	2
	2	3	0	4		0	0	1	0
	0	2	3	3		0	0	2	0
	1	0	4	4		0	0	0	0
	1	4	0	0		0	0	0	1
	0	0	0	0		0	0	0	0
	0	3	4	0		0	0	0	1
	0	2	0	5		0	0	1	1
	0	0	0	0		0	1	0	0
	0	0	4	1		0	0	0	0
Figure 4-figure supplement 2F
Figure 4-figure supplement 2G					LC3b					p62
			DLD1	NCLX KO #6	NCLX KO #24	NCLX KO #32		DLD1	NCLX KO #6	NCLX KO #24	NCLX KO #32
			1	1.41793	1.64819	1.56079		1	1.8458	2.2992	2.51283
			1	2.19752	2.16091	1.76142		1	1.29315	2.16026	1.41726
			1	1.58411	2.21476	1.69421		1	1.24312	1.9267	1.61583
			1	1.5737	2.08482	1.45686		1	1.30184	1.2543	1.62371
Figure 4-figure supplement 2H, I									LC3b						p62
								Scramble HCT	shNCLX #2	shNCLX #3	shNCLX # 2+3			Scramble HCT	shNCLX #2	shNCLX #3	shNCLX # 2+3
								1	1.67903	1.45671	1.66959			1	1.25692	2.10592	1.5789
								1	1.24275	1.23351	1.48359			1	1.43457	1.44701	1.30173
								1	1.21005	1.21024	1.22368			1	1.66892	1.30912	1.30231
Figure 4-figure supplement 2J	Time min	DLD1		NCLX KO #6
		Mean	SE of mean	Mean	SE of mean
		Statistics On Rows of [Book1]Sheet1!Col(B):Col(D)	Statistics On Rows of [Book1]Sheet1!Col(B):Col(D)	Statistics On Rows of [Book1]Sheet1!Col(F):Col(H)	Statistics On Rows of [Book1]Sheet1!Col(F):Col(H)
	1.58986	88.7498	6.5617	45.0224	2.64136
	8.1763	84.2016	6.21653	41.9748	2.45263
	14.7622	77.8484	5.92455	35.8165	2.62916
	21.4304	28.1519	1.62167	8.37724	1.94703
	28.0201	25.7508	2.18002	8.74772	1.62955
	34.6095	26.7417	2.69114	9.08892	1.50197
	41.2747	176.127	11.5412	77.7333	5.04926
	47.8713	168.93	11.9664	72.7667	7.19132
	54.4662	161.36	10.3556	69.7633	7.59876
	61.1433	15.9567	0.84232	3.04	1.04006
	67.7455	15.75	1.2067	3.26333	1.42029
	74.3455	14.3033	1.33578	3.09	1.60262
		--	--	--	--
Figure 4-figure supplement 2K		--	--	--	--
		BASAL			Spare			ATP			Maximal
		DLD	NCLX KO #06		DLD	NCLX KO #06		DLD	NCLX KO #06		DLD	NCLX KO #06
		56.1728	30.4529		88.988	40.3636		46.3076	24.9961		145.161	70.8165
		62.3332	38.5047		97.3908	46.7484		50.8582	30.4246		159.724	85.2531
		72.1269	33.414		108.457	38.6347		59.1268	26.897		180.584	72.0487
Figure 4-figure supplement 2L	Time	DLD1		NCLX KO #24		NCLX KO #32
		Mean	SE of mean	Mean	SE of mean	Mean	SE of mean
	1.59551	793.742	93.006	485.863	34.1968	480.476	2.00714
	8.18774	761.523	84.817	464.313	28.8742	461.261	3.12451
	14.783	759.312	85.6042	460.65	28.048	458.494	5.3341
	21.456	444.594	35.0117	248.884	23.0133	265.211	57.2551
	28.0513	362.686	24.3005	211.734	1.8962	218.741	18.8747
	34.6492	353.175	39.5503	207.113	6.78164	210.941	9.97496
	41.3228	1448.62	137.311	811.177	40.022	816.22	9.84981
	47.9254	1494.68	155.174	859.129	48.6133	871.834	15.2051
	54.5287	1470.56	158.407	847.91	56.0419	851.937	15.2284
	61.219	275.296	31.9185	154.105	1.44722	150.296	6.9577
	67.8328	263.122	31.0482	150.197	2.65925	147.986	7.73982
	74.4439	253.889	29.5048	144.47	2.58678	144.583	6.8012
Figure 4-figure supplement 2M
	Basal				Spare				ATP				Maximal
	DLD1	NCLX KO #24	NCLX KO #32		DLD1	NCLX KO #24	NCLX KO #32		DLD1	NCLX KO #24	NCLX KO #32		DLD1	NCLX KO #24	NCLX KO #32
	470.615	381.745	349.854		662.022	477.618	447.07		384.45	309.974	276.982		1132.64	859.362	796.923
	652.429	301.538	280.903		947.862	360.471	359.869		531.409	240.163	229.604		1600.29	662.009	640.772
	442.697	292.802	348.071		656.725	385.224	488.889		356.001	232.764	272.459		1099.42	678.026	836.96
	455.949	288.636	276.817		674.881	370.603	357.534		364.165	231.776	213.365		1130.83	659.239	634.351
Figure 4-figure supplement 2N
Figure 4-figure supplement 2O
				ATP5A					UQCRC2					MTCO1					SDHB					NDUF8B
		HCT116	NCLX KO #33	NCLX KO #37	NCLX KO #59		HCT116	NCLX KO #33	NCLX KO #37	NCLX KO #59		HCT116	NCLX KO #33	NCLX KO #37	NCLX KO #59		HCT116	NCLX KO #33	NCLX KO #37	NCLX KO #59		HCT116	NCLX KO #33	NCLX KO #37	NCLX KO #59
		1	0.89973	0.92161	0.99745		1	0.98491	1.0387	0.91884		1	1.00403	0.99697	0.99722		1	0.99335	1.02959	1.02857		1	0.90161	0.93796	0.94143
		1	0.99014	0.98218	0.99011		1	0.96882	0.98921	1.03209		1	0.9914	0.97071	0.97525		1	1.02649	1.00099	1.01702		1	1.02852	1.09058	1.0185
		1	0.96903	1.01966	0.98643		1	0.93238	0.98534	0.92828		1	0.98512	1.04052	1.04426		1	1.08902	1.04598	0.99409		1	1.01934	1.07795	0.99513
Figure 4-figure supplement 2Q
		HCT116	siNCLX		HT29	siNCLX		DLD1	siNCLX
		1	1.3378		1	1.27097		1	1.05894
		1	1.16906		1	1.37786		1	1.2898
		1	1.42568		1	1.3239		1	1.73535
		1	1.3373		1	2.21109		1	1.36842
		1	1.13585		1			1	1.48885
