# Supplementary material for: Dichotomous role of the human mitochondrial Na+/Ca2+/Li+ exchanger NCLX in colorectal cancer growth and metastasis
Source: eLife. 2020 Sep 11;9:e59686. doi: 10.7554/eLife.59686 (PMC7529464; doi:10.7554/eLife.59686)
Supplement: Figure 4—source data 1. [file elife-59686-fig4-data1.xlsx]

## Sheet: Figure 4
Figure 4A	HCT116	NCLX KO #33	NCLX KO #37	NCLX KO #59	Control +	Control -
	12164	9986	9337	7965	--	161
	12296	10448	9596	8953
	18153	10439	7880	8010
	10680	9284	7447	9263	397	174
	16798	9067	8767	9298
	10787	9228	6797	6146
	10978		5578	5754	934	191
	--		6166	6289
Figure 4B	DLD1	NCLX KO #6	NCLX KO #24	NCLX KO #32	Control +	Control -
	4557	1644	3970	1537	202	124
	6716	1833	3321	1650
	2899	1586	3570	1630
	3050	733	1123	775	221	185
	--	710	1104	609
		780	1154	636
Figure 4D		HCT116	4.68262	5.18672	7.88644	0.63452	7.9023	4.6225	19.5531	10.3448	3.7594	13.8122	14.9864	10.0503	4.87013		1.0989	6.38298	4.05405	0.4845	3.0303	4.34783	7.89474	3.33333	15.3846	9.375		4.16667	5.64516	10	3.22581	0.54348	1.38889	7.8125	3.57143	3.47222	2.43902	4.83871		2.50979	1.88348	6.47389	0.89606	2.27411	2.89051	6.88389	7.27802	4.89157	8.92326
		NCLX KO #33	1.58278	1.92753	1.94477	2.18723	3.19898		2.16638	3.92157	5.88028	0	0	0	2.44618	6.87758	5.21739	0		0	0	3.79219	3.0021	2.81215	6.14628	1.31614		12.3355	3.54108	12.9266	0	7.96601	2.34412	0	0	18.3105	0		3.97141	1.39743	1.08342	0	3.69549	7.06547		0	0	1.1325	2.72628
		NCLX KO #37	6.25521	1.08342	6.74764	7.26744	2.10113	1.49187	4.25713	1.59134	0.69367		7.75795	8.39866	14.3472	5.48095	2.08551	12.9534	2.06612	0	0	0	3.23834	0	4.8		5.23834	2.79096	6.92521	6.66489	7.16561		2.40038	1.48633	2.73075		2.8082	2.47893	5.76236	3.0581	3.83907	4.57289	9.47568	5.94766	0.89142		0	5.5966	4.1365
		NCLx KO 59	7.91139	3.17965	3.02755	6.55996	4.24628	5.23834		0	3.04507	2.53357	0	5.32595	3.47584	8.29876		2.54582	3.94477	3.44471	12.8425	0	6.57462		2.93026	8.54117	2.64466	5.63825	0	0		0	4.7259	0	8.51644	0	0.91625	0		5.47705	1.3587	8.52273	2.01045	0	0	4.42347	5.75209	3.97878
Figure 4E	HCT116	NCLX KO #33	NCLX KO #37	NCLX KO #59
	26.6667	28.5714	69.2308	100
	27.2727	33.3333	59.0909	50
	23.5294	48.1482	44.8276	63.6364
	28.5714	42.1053	53.5714	71.4286
	27.7778	40.625	90	100
	0	28.125	58.1818	66.6667
	16.6667	57.6923	45.6522	51.5151
	0	46.4286	73.1707	100
	0	46.4286	81.25	53.3333
	16.6667	66.6667	85.7143	66.6667
	0	100	91.6667	88.2353
	0	54.8387	100	100
	14.2857	57.6923	58.3333	100
	0	85	48	52.6316
	4.65116	54.5455	100	44.1176
	4.7619	67.3469	100	92.5926
	5	86.0465	80	75
	13.3333	100		65.1163
	6.06061	100		51.7241
	18.1818	62.5		48.1482
	9.09091	100		100
	0	80		100
	33.3333			71.4286
	16.6667			50
	100
Figure 4F	HCT116	9	10	5	7	11	6	7	9	10	10	11	8	6		2	12	3	5	4	6	3	3	4	6		6	7	4	4	10	2	5	3	5	4	6		5	3	3	2	3	5	3	5	6	6	5
	NCLX KO #33	3	2	1	1	1		1	2	1	0	0	0	1	2	3	0		0	0	2	2	3	2	1		3	1	2	0	3	1	0	0	3	0		2	1	1	0	3	6		0	0	1	2	0
	NCLX KO #37	3	1	2	3	3	2	2	1	1		4	3	4	4	2	3	1	0	0	0	2	0	3		2	2	8	5	9		1	2	2		2	1	1	1	5	5	3	3	1		0	5	4
	NCLx KO 59	2	2	2	5	2	2		0	2	2	0	1	2	2		2	4	2	3	0	4		3	5	5	1	0	0		0	1	0	1	0	1	0		1	1	3	2	0	0	3	4	3
Figure 4G
Figure 4H, I		HCT116	NCLX KO #33	NCLX KO #37	NCLX KO #59			HCT116	NCLX KO #33	NCLX KO #37	NCLX KO #59
		1	1.9194	2.10415	1.75375			1	1.30142	1.25443	1.62213
		1	2.13772	1.96629	1.7626			1	1.37675	1.38075	1.4042
		1	2.38929	1.91499	1.81994			1	1.18504	1.57154	1.64486
		1	1.64005	2.10578	1.90817
		1	1.40459	1.7479	1.7128
Figure 4J		Time (min)	Mean	SE of mean	Mean	SE of mean
			HCT116		NCLX KO #33
		1.58986	157.414	4.38624	136.183	4.98107
		8.1763	148.32	2.68802	129.18	4.71271
		14.7622	147.117	2.19606	128.35	4.65062
		21.4304	97.7667	11.8156	63.3567	2.75324
		28.0201	77.52	2.5752	63.6667	2.68889
		34.6095	77.0833	0.63299	65.7867	3.24599
		41.2747	271.3	3.19606	216.537	6.87395
		47.8713	282.07	5.15578	230.867	8.2135
		54.4662	282.587	7.30053	228.647	8.5272
		61.1433	45.85	1.17554	37.02	1.34675
		67.7455	45.9033	0.65565	38.2867	1.45813
		74.3455	44.8833	0.32946	38.01	1.18627
Figure 4K		HCT116	NCLX KO #33		HCT116	NCLX KO #33		HCT116	NCLX KO #33		HCT116	NCLX KO #33
		Basal Respiration			Spare respiration			ATP production			Maximal respiration
		101.81	90.9998		139.71	90.8676		70.797	64.6071		241.519	181.867
		105.679	97.2301		141.729	110.267		74.0403	68.4783		247.409	207.497
		99.2088	85.7651		124.971	106.416		65.2629	61.8901		224.18	192.181
Figure 4L		Time	HCT116	SEM	NCLX KO #37	SEM	NCLX KO #59	SEM
		1.38212	542.728	14.243	491.973	22.7583	461.391	7.16812
		9.89761	518.65	17.6638	474.639	16.1215	456.569	5.47053
		18.4046	512.383	17.1421	464.887	13.1315	455.555	4.56947
		27.0147	301.033	5.42488	269.32	12.6329	239.625	6.72982
		35.5227	304.488	5.86022	268.823	10.4132	246.091	6.06821
		44.0292	303.981	6.43304	269.342	11.4352	247.232	5.9549
		52.6325	1311.49	54.5316	1051.39	33.7613	1000.95	28.7578
		61.136	1278.89	49.805	988.095	52.1088	967.306	33.9637
		69.6405	1251.86	40.0668	954.518	51.4757	918.337	42.5901
		78.2485	281.394	11.9938	233.86	15.1412	208.407	5.06385
		86.7513	285.254	9.7375	244.935	14.1144	219.344	4.62258
		95.2558	285.369	11.0233	246.464	12.1382	221.373	4.48757
Figure 4 M		Basal Respiration				Spare Respiratory Capacity				ATP generation				Maximal Respiration
		HCT116	NCLX KO #37	NCLX KO #59		HCT116	NCLX KO #37	NCLX KO #59		HCT116	NCLX KO #37	NCLX KO #59		HCT116	NCLX KO #37	NCLX KO #59
		293.734	247.15	249.704		749.138	621.212	527.601		258.102	215.766	207.167		1042.87	868.362	777.305
		151.74	230.924	244.804		699.81	673.965	558.468		156.783	196.415	216.687		851.549	904.889	803.271
		205.552	219.845	230.668		652.563	587.582	447.415		197.01	183.634	206.678		858.115	807.427	678.083
		266.081	247.256	254.058		768.398	391.942	512.894		228.756	217.788	218.108		1034.48	639.198	766.951
		285.801	231.891	228.085		910.886	429.468	575.421		266.449	226.42	218.971		1196.69	661.359	803.506
Figure 4N		HCT116	NCLX KO #33	NCLX KO #37	NCLX KO #59	Positive	Negative
		596	658	1044	3292	7817	139
		742	700	1218	4074
		718	689	1072	4594
		568	1002	1495	732	4008	66.8
		587	871	1415	857
		658	1181	1400	810
		819	1394	1242	903	5812	69.4
		848	1363	1024	956
		--	1199	1000	939
		421	555	676	--	4831	87.4
		407	529	655	765
		531	438	810	585
Figure 4O		DLD1	NCLX KO #6	NCLX KO #24	NCLX KO #32	Positive	Negative
		270	730	350	297	2981
		270	559	326	519
		318	460	304	424
		337	273	544	423	4254	41.1
		399	337	550	406
		279	339	389	380
		259		532	328	3959	75.8
				556
				494
[truncated: 18 more columns]
