# Supplementary material for: Dichotomous role of the human mitochondrial Na+/Ca2+/Li+ exchanger NCLX in colorectal cancer growth and metastasis
Source: eLife. 2020 Sep 11;9:e59686. doi: 10.7554/eLife.59686 (PMC7529464; doi:10.7554/eLife.59686)
Supplement: Figure 5—figure supplement 1—source data 1. [file elife-59686-fig5-figsupp1-data1.xlsx]

## Sheet: Figure 5_figure supplement_1
Figure 5-figure supplement 1G, H	SLC7A11					GCLM
	HCT116	NCLX KO #33	NCLX KO #37	NCLX KO #59		HCT116	NCLX KO #33	NCLX KO #37	NCLX KO #59
	1	4.67386	3.49326	2.43975		1	1.45024	3.01033	1.54074
	1	4.88589	4.26553	3.22005		1	1.11126	5.32998	1.61404
	1	3.9927	2.19915	1.58936		1	1.52493	2.28038	1.58307
	1	4.67968	3.45769	2.46889		1	1.45893	3.46231	1.88793
Figure 5-figure supplement 1I-N			SLC7A11					GCLM					FOXO3					2020-10-04					SOX2					NANOG
	DLD1	NCLX KO #06	NCLX KO #24	NCLX KO #32		DLD1	NCLX KO #06	NCLX KO #24	NCLX KO #32		DLD1	NCLX KO #06	NCLX KO #24	NCLX KO #32		DLD1	NCLX KO #06	NCLX KO #24	NCLX KO #32		DLD1	NCLX KO #06	NCLX KO #24	NCLX KO #32		DLD1	NCLX KO #06	NCLX KO #24	NCLX KO #32
	1	2.07654	1.81844	1.11426		1	3.0225	3.4725	3.87		1	1.73214	2.53752	1.20274		1	1.36631	1.12355	1.06736		1	18.5028	17.2429	26.8276		1	1.92385	1.48315	1.12069
	1	2.16516	1.61117	1.18874		1	3.99671	3.63158	3.51974		1	1.88356	1.61842	1.22494		1	0.91121	0.94068	1.07413		1	14.2534	16.4134	17.6698		1	2.08579	1.88772	1.21289
	1	2.04358	1.7498	1.35863		1	3.98494	3.60843	3.46988		1	1.59483	1.129	1.0223		1	0.80175	0.74875	0.65914		1	15.3716	14.5756	15.2027		1	1.62477	1.47369	1.17113
	1	3.2695	3.95035	2.57447							1	1.54198	1.9542	1.07634		1	0.62715	0.99926	0.91589
	1	2.69697	2.67273	2.10303							1	1.40299	1.08209	1.07463		1	0.57523	0.86081	0.79175
	1	2.52047	2.5614	1.59649							1	1.30303	1.27273	1.25758		1	0.7049	0.93294	1.14554
