# Supplementary material for: Dichotomous role of the human mitochondrial Na+/Ca2+/Li+ exchanger NCLX in colorectal cancer growth and metastasis
Source: eLife. 2020 Sep 11;9:e59686. doi: 10.7554/eLife.59686 (PMC7529464; doi:10.7554/eLife.59686)
Supplement: Figure 5—source data 1. [file elife-59686-fig5-data1.xlsx]

## Sheet: Figure 5
Figure 5H-J	NANOG					2020-10-04					Sox2
	HCT116	NCLX KO #33	NCLX KO #37	NCLX KO #59		HCT116	NCLX KO #33	NCLX KO #37	NCLX KO #59		HCT116	NCLX KO #33	NCLX KO #37	NCLX KO #59
	1	1.4102	1.29828	1.1999		1	1.22413	1.8766	1.18436		1	7.49157	3.65278	4.74846
	1	1.65281	1.65133	2.07442		1	1.13112	1.46881	1.08563		1	5.41733	1.43908	10.1669
	1	1.57479	1.38164	1.24091		1	1.94014	1.4443	1.58861		1	3.93439	1.50767	9.22774
	1	1.56893	1.59904	1.7769		1	1.88673	1.54632	1.44659		1	4.55891	2.46787	7.68906
Figure 5K				0 hr									24 hr									48 hr									72 hr
	HCT116	HCT116 5FU	NCLX KO #33	NCLX KO #33 5FU	NCLX KO #37	NCLX Ko #37 5FU	NCLX KO #59	NCLX ko #59 5FU		HCT116	HCT116 5FU	NCLX KO #33	NCLX KO #33 5FU	NCLX KO #37	NCLX Ko #37 5FU	NCLX KO #59	NCLX ko #59 5FU		HCT116	HCT116 5FU	NCLX KO #33	NCLX KO #33 5FU	NCLX KO #37	NCLX Ko #37 5FU	NCLX KO #59	NCLX ko #59 5FU		HCT116	HCT116 5FU	NCLX KO #33	NCLX KO #33 5FU	NCLX KO #37	NCLX Ko #37 5FU	NCLX KO #59	NCLX ko #59 5FU
	1	1	1	1	1	1	1	1		3.17942	2.09865	1.89326	1.96171	1.24507	1.80814	2.6127	1.70131		9.89281	5.5856	2.18975	1.44818	3.25789	2.46429	5.02831	3.20745		17.274	6.62282	2.5555	1.47993	5.64942	2.45079	7.94145	4.64067
	1	1	1	1	1	1	1	1		2.76243	2.83573	1.95391	1.55994	1.10355	1.54693	2.74884	1.9578		8.02466	5.54892	2.22343	1.14061	3.32742	1.92716	5.42503	3.37929		11.3752	6.35102	2.53126	1.35385	3.91181	1.3997	5.61665	4.1886
	1	1	1	1	1	1	1	1		2.69415	1.19874	1.66886	1.0786	1.69125	1.91008	3.03383	2.36739		10.2853	3.38338	2.18851	1.31414	3.83678	3.40997	3.38955	2.48404		12.3419	3.92131	2.3634	5.44091	4.91336	1.5288	4.04756	2.73428
	1	1	1	1	1	1	1	1		3.20838	2.35322	1.65596	1.08195	1.50337	1.37902	3.58631	1.40613		9.7435	4.49211	1.99783	1.19125	3.00183	2.06941	4.92541	1.14052		12.6524	5.48081	5.59123	2.33271	4.8919	2.50973	4.66578	1.67092
	1	1	1	1	1	1	1	1		2.1865	4.64397	3.8218	2.00552	2.5719	2.04962	2.32888	1.67278		6.52845	4.67209	6.93284	1.9803	3.69611	2.3177	2.64973	1.71673		11.6364	7.29651	6.62644	2.30437	4.29211	2.71471	2.98512	2.87425
	1	1	1	1	1	1	1	1		5.91263	5.25425	2.333	1.78214	2.5911	1.52906	2.21533	1.05011		14.2951	4.45757	5.60619	1.91697	2.73277	1.56763	2.22365	1.12005		18.6276	7.67628	5.0639	5.9881	4.89797	2.01827	2.82735	2.79427
	1	1	1	1	1	1	1	1		3.15	3.88812	3.85157	2.00787	1.41991	1.83321	1.80586	1.77138		7.63119	5.82088	5.27041	1.39624	1.60397	2.22541	2.39259	2.12446		9.49587	3.09533	4.80733	3.07218	3.36091	2.93942	2.51441	3.90156
	1	1	1	1	1	1	1	1		3.30108	3.81694	2.91432	1.79959	2.13878	1.5789	2.20621	1.14271		7.61536	5.99691	7.05181	1.19219	2.65232	1.8641	3.18042	1.77039		7.44684	3.27014	4.345	3.02226	1.66658	2.91257	3.36662	5.54552
	1	1	1	1	1	1	1	1		1.87804	1.23285	2.83728	1.73238	1.37818	1.18678	1.61963	1.12145		9.48439	1.51894	6.55499	0.99971	1.60187	1.36861	1.99673	1.50416		5.94122	1.00224	1.56513	3.90461	2.66165	3.80008	2.07484	1.14783
	1	1	1	1	1	1	1	1		1.89006	1.75381	3.84298	1.85443	1.37132	1.10391	1.72553	1.03711		8.51814	1.82445	4.02504	0.94687	1.57333	1.38061	2.23379	1.66781		8.87797	0.96906	3.48381	3.92455	1.57333	5.38061	2.19466	2.4302
	1	1	1	1	1	1	1	1		3.09656	1.70151	1.03651	3.7921	--	--	--	--		10.751	1.87393	1.45905	4.45304	--	--	--	--		12.5161	1.37916	1.60337	1.29543	--	--	--	--
	1	1	--	--	--	--	--	--		3.13113	2.13743	3.05962	3.64168	--	--	--	--		7.21469	1.83728	3.32311	4.01798	--	--	--	--		7.7756	0.74771	1.60408	2.16735	--	--	--	--
	1	1	--	--	--	--	--	--		2.57005	1.21101	--	--			--	--		6.69485	0.83867	--	--	--			--		4.18461	4.1735	--	--
	1	1	--	--	--	--	--	--		2.86522	3.44704	--	--			--	--		4.501	3.69902	--	--	--			--		7.85412	4.17313	--	--
	1	1	--	--	--	--	--	--		5.14452	1.75034	--	--			--	--		7.61277	2.0115	--	--				--		--	--	--	--
																	--		--
