# Supplementary material for: Dichotomous role of the human mitochondrial Na+/Ca2+/Li+ exchanger NCLX in colorectal cancer growth and metastasis
Source: eLife. 2020 Sep 11;9:e59686. doi: 10.7554/eLife.59686 (PMC7529464; doi:10.7554/eLife.59686)
Supplement: Figure 6—figure supplement 1—source data 1. [file elife-59686-fig6-figsupp1-data1.xlsx]

## Sheet: Figure 6_figure supplement_1
Figure 6-figure supplement 1A			HCT116				NCLX KO #33					HCT116				NCLX KO #33					HCT116				NCLX KO #33					HCT116				NCLX KO #33
					0 hr									24 hr									48 hr									72 hr
	5FU conc. (µM)	0	1	10	25	0	1	10	25		0	1	10	25	0	1	10	25		0	1	10	25	0	1	10	25		0	1	10	25	0	1	10	25
		1	1	1	1	1	1	1	1		4.60243	2.96361	2.51756	1.95649	2.38665	2.24644	2.6308	1.77916		13.252	9.09046	5.19007	2.84733	7.16066	5.8669	4.69277	2.04425		19.9471	16.9533	9.01235	3.79898	9.29405	10.1989	7.93475	2.66322
		1	1	1	1	1	1	1	1		3.64641	2.45284	2.58565	1.74382	2.74876	1.99837	2.25391	1.2342		10.4774	7.22959	4.62849	2.55221	7.13488	5.37256	4.03436	1.60381		14.0218	14.8067	6.31687	2.73842	8.29675	8.95912	8.79949	1.82728
		1	1	1	1	1	1	1	1		2.3191	1.87547	3.23877	2.54959	2.65219	2.71353	1.82992	1.74549		10.0593	7.43034	5.73195	2.37017	7.43541	5.33846	2.29682	1.38798		12.3365	11.2739	5.08259	1.74836	9.08132	7.19708	6.34344	2.00987
Figure 6-figure supplement 1B	Does (µM)	%Cell viability
		HCT116	SEM	NCLX KO #33	SEM
	0	100	0	100	0
	1	93.9916	6.08955	98.9903	9.88236
	10	43.8103	1.30595	71.819	8.4375
	25	17.5824	1.71081	24.2704	2.1926
Figure 6-figure supplement 1C				0 hr										24 hr								48 hr											72 hr
	DLD1	DLD1 5FU	NCLX KO #6	NCLX KO #6 5FU	NCLX KO #24	NCLX KO #24 5FU	NCLX KO #32	NCLX KO #32 5FU		DLD1	DLD1 5FU	NCLX KO #6	NCLX KO #6 5FU	NCLX KO #24	NCLX KO #24 5FU	NCLX KO #32	NCLX KO #32 5FU		DLD1	DLD1 5FU	NCLX KO #6	NCLX KO #6 5FU	NCLX KO #24	NCLX KO #24 5FU	NCLX KO #32	NCLX KO #32 5FU		DLD1	DLD1 5FU	NCLX KO #6	NCLX KO #6 5FU	NCLX KO #24	NCLX KO #24 5FU	NCLX KO #32	NCLX KO #32 5FU
	1	1	1	1	1	1	1	1		2.27869	1.17114	0.8234	1.21358	0.42596	1.38118	1.01816	0.85856		5.19586	1.84643	2.6851	1.79143	2.33006	1.94758	2.78648	3.87296		8.46639	2.19001	4.03278	2.58843	6.14435	4.22296	5.94365	4.81681
	1	1	1	1	1	1	1	1		2.45695	1.48717	1.19672	0.88956	1.45702	1.65576	1.21271	1.00157		4.97755	2.44688	2.57337	1.67125	1.93618	2.3544	2.85331	3.09718		9.26727	2.12495	2.8186	1.94857	5.45117	4.63355	4.96676	4.93851
	1	1	1	1	1	1	1	1		3.14511	3.27161	0.82186	0.77113	1.79085	2.32275	1.46436	0.80949		5.87166	3.18684	1.80277	2.21937	3.22815	3.34074	4.02998	3.5828		11.392	2.06838	3.54139	2.20617	5.88275	7.95286	6.94323	5.93972
	1	1	1	1	1	1	1	1		3.51307	0.84692	1.6841	0.85745	1.62623	1.81076	1.2315	0.87305		6.07305	1.24115	3.29934	2.0523	3.43078	1.56368	3.50673	3.54907		9.74013	2.27784	4.99314	2.12227	7.12156	5.24038	7.59394	6.10133
	1	1	1	1	1	1	1	1		2.97467	2.43613	2.23859	1.86844	1.59348	3.07637	1.41517	2.31194		7.91334	2.28055	8.5135	2.90167	4.99691	4.56376	4.09804	3.09609		27.8667	2.66391	12.7866	9.60793	6.67224	5.23098	9.64083	4.21811
	1	1	1	1	1	1	1	1		3.45909	2.07525	2.43185	2.46523	2.11697	4.04906	1.61647	2.91173		9.99059	3.34523	7.89541	3.74178	7.16811	6.43044	5.21455	4.15256		25.9572	2.77356	12.4391	9.09856	10.0024	6.81114	11.7664	5.30473
	1	1	1	1	1	1	1	1		2.79969	2.78668	2.63097	1.66179	2.2062	2.57108	1.60116	3.4208		8.75761	2.425	5.40346	2.66145	5.94159	3.63814	5.24473	4.61757		28.6529	2.57853	11.2298	7.2945	9.85805	4.37001	10.3779	5.72048
	1	1	1	1	1	1	1	1		2.46388	1.90667	2.50756	2.30959	1.90225	2.67114	1.36016	3.27419		7.77873	1.98745	5.9306	2.89685	6.04067	4.39732	4.21226	4.7904		19.2648	1.78722	12.6687	8.58844	7.96167	5.3215	7.59007	7.57263
Figure 6-figure supplement 1D	HCT116			NCLX KO #33			NCLX KO #37			NCLX KO #59
	Normal	5FU		Normal	5FU		Notmal	5FU		Normal	5FU
	64.4253	64.4429		100	91.3289		72.013	100		86.1333	77.8487
	57.7101	75.7284		100	96.28		75.9301	100		88.1415	80.4774
	55.0093	69.434		100	95.2211		64.318	97.3752		100	100
	57.3401	57.9089		100	88.5882		66.2656	93.0924		100	100
	63.4703	47.7334		100	90.1708		80.3056	100		87.5946	70.8484
	64.0481	54.6845		100	92.8492		92.2091	88.8687		73.1658	68.6321
	59.029	60.0662		63.2544	53.0656		58.6996	88.6339		65.6107	83.8641
	67.8507	45.1081		62.5563	52.1551		55.78	88.9802		66.8209	84.4188
	50.6345	38.8546		73.3204	50.0042		69.4324	66.7339		78.243	83.2168
	52.6369	48.8077		70.2692	42.997		78.1977	70.5122		77.9519	76.1191
	61.45	52.2919		70.0362	67.3215		67.4649	75.8741		77.9062	59.4146
	62.466	55.3521		67.6792	68.6594		63.1551	77.0565		76.3827	47.41
	53.0562	47.2872		55.2878	56.5342		70.3558	37.8602		85.2176	84.5027
	57.4091	42.2745		62.1786	51.1939		100	43.2873		88.8837	82.472
	52.7589	45.8764		55.8014	--		100	52.5709		98.0905	91.7291
	62.9812	40.1046		64.943	--		100	53.8094		97.9034	98.3792
	73.4852	55.223		82.1912	--		100	43.1303		81.1053	100
	75.7896	49.6427		83.7348	--		78.0431	59.0474		76.1432	100
	80.5633	--		71.5618	--		79.7783	--		97.6059	--
	74.4473	--		74.9095	--		57.1895	--		100	--
	64.3365	--		86.1803	--		69.3474	--		78.2597	--
	76.3421	--		80.4343	--		60.3369	--		76.5954	--
	73.4852	--		--	--		70.8962	--		--	--
	75.7896	--		--	--		--	--		--	--
	80.5633	--			--			--			--
	74.4473	--			--			--			--
		--			--			--			--
Figure 6-figure supplement 1E	DLD1			NCLX KO #06			NCLX KO #24			NCLX KO #32
	Normal	5FU		Normal	5FU		Notmal	5FU		Normal	5FU
	45.9379	61.2953		59.1706	84.8021		56.3094	89.6418		53.573	89.7818
	51.267	57.5219		65.4463	86.9441		52.1893	92.271		63.9232	86.3714
	54.485	56.907		60.6142	81.6866		61.0403	95.6403		74.8492	92.0004
	60.099	56.332		42.7872	85.7099		68.2083	95.046		74.7727	74.9064
	53.0319	33.8194		73.903	78.0166		80.2149	91.5878		84.7439	79.4985
	54.4936	46.795		73.4261	70.6013		82.3146	71.9727		72.6121	75.4032
	63.3482	30.8904		63.645	54.1444		97.6937	60.9319		96.858	66.6897
	57.1007	20.7502		90.6082	55.4923		89.0341	74.3362		90.413	63.3232
	--	--		89.5114			--			100
	--			91.2922	--		--	--		100	--
Figure 6-figure supplement 1F,G																	HCT116	NCLX KO #33	NCLX KO #37	NCLX KO #59
																	1	0.99143	0.98106	1.01888
																	1	1.00233	0.99137	1.01818
																	1	1.00594	1.12328	1.10209
Figure 6-figure supplement 1H,I
																	HCT116	NCLX KO #33	NCLX KO #37	NCLX KO #59
																	1	0.96675	0.98026	1.01566
																	1	0.98298	0.98554	0.98466
																	1	0.97133	0.96038	1.01715
