# Supplementary material for: Dichotomous role of the human mitochondrial Na+/Ca2+/Li+ exchanger NCLX in colorectal cancer growth and metastasis
Source: eLife. 2020 Sep 11;9:e59686. doi: 10.7554/eLife.59686 (PMC7529464; doi:10.7554/eLife.59686)
Supplement: Figure 6—source data 1. [file elife-59686-fig6-data1.xlsx]

## Sheet: Figure 6
Figure 6 A, B								HCT116	NCLX KO #33
								0.5	0.51389
								0.31302	0.81443
								0.32442	0.98453
								0.58168	0.88746
								0.08711	0.51063
								0.11737	0.73897
								0.324	0.45714
								0.34711	0.48945
								0.27049	0.56961
								--
								--
								--
Figure 6 C, D
										HIF1α
								DLD1	NCLX KO #6	NCLX KO #24	NCLX KO #32
								1	1.82019	1.95583	1.94004
								1	2.10283	2.84516	2.53234
								1	2.65577	3.06918	3.26746
								1	2.3457	2.3478	2.4804
Figure 6 E, F
										HIF1α
									Scramble	shNCLX #2	shNCLX #3	shNCLX #2+3
									1	3.24704	2.32554	2.5727
	--	--	--	--					1	2.66428	2.3928	1.85084
	--	--	--	--					1	2.19999	1.83812	1.50113
	--	--	--	--					1	1.92574	1.7529	1.72406
	--	--	--	--
	--	--	--	--
	--	--	--	--
	--	--	--	--
	--	--	--	--
	--	--	--	--
	--	--	--	--
	--	--	--	--
	--	--	--	--
	--	--	--	--
	--	--	--	--
	--	--	--	--
	--	--	--	--							HCT116	HCT116	NCLX KO	NCLX KO
Figure 6 G, H	--	--	--	--								mitoT		mitoT
	--	--	--	--							1	0.94415	1	0.46885
	--	--	--	--							1	0.82753	1	0.32663
	--	--	--	--							1	0.82123	1	0.3348
	--	--	--	--							1	0.8286	1	0.19182
	--	--	--	--
	--	--	--	--
	--	--	--	--
	--	--	--	--
	--	--	--	--
	--	--	--	--
	--	--	--	--
Figure 6J			12hr	mito TEMPO						24hr	mito TEMPO
	HCT116	NCLX KO #33		HCT116	NCLX KO #33			HCT116	NCLX KO #33		HCT116	NCLX KO #33
	20.1065	13.9891		6.25566	5.35782			32.6355	21.0248		18.4013	7.94911
	14.0098	17.1937		15.2469	5.52894			22.6892	25.676		16.699	12.9353
	22.3329	30.946		20.1171	10.301			35.6817	40.901		30.391	15.4321
	21.8371	28.6619		11.1229	7.44023			34.2045	38.0923		33.8496	12.339
	4.34556	14.5347		13.2317	7.72131			13.1421	24.1354		18.9778	12.6469
	7.07293	12.3002		12.9654	7.27551			15.7227	31.7305		17.99	13.5202
	12.3305	15.8092		10.6245	6.72563			20.2974	33.6188		19.0133	17.0517
	10.5571	13.5848		14.152	9.43081			15.5117	30.0073		15.4754	18.5107
	19.5386	31.6504		23.83	5.61936			33.7679	43.6028		30.607	11.4032
	19.1063	46.9665		14.0598	10.9334			28.8673	53.1153		36.9255	15.4428
	10.9352	28.0281		14.6096	7.71111			18.2123	33.7928		18.1145	15.7327
	13.8524	11.6158		13.581	9.1651			17.2883	25.0609		19.5571	18.0604
	13.1851	11.0565		12.1525	5.94113			17.1996	41.296		19.5687	20.6729
	9.70102	13.7916		23.3989	7.37046			18.0204	25.2011		17.9139	11.3208
	9.9926	17.881		25.9213	6.02626			20.6507	30.007		39.5138	14.8706
	13.8239	15.0872		13.603	8.61425			24.6742	30.6272		33.8581	24.4916
	16.6362	12.1873		15.1608	8.02466			17.2094	25.8179		19.2176	22.6334
	16.6029	12.3741		21.1421	20.482			14.8913	21.2685		20.6586	32.3485
	20.2386	35.6785		22.7441	15.8126			25.4276	22.1595		29.8275	25.2148
	19.4158	10.0651		29.0689	26.9774			25.2452	28.6459		31.2062	35.8576
	31.4375	20.9774		24.5593	29.0721			41.2593	30.5052		45.7232	38.886
	27.8416	21.473		23.7112	27.9313			42.0957	21.1764		63.1748	34.5477
	17.618	13.2742		20.5671	29.1515			24.2242	29.0491		34.3479	40.8211
	18.7153	28.0888		21.4507	--			26.0473	29.3746		33.2759	--
		24.5432		26.1949	--				29.7273		26.3593	--
		19.3952		27.5723	--				22.4213		25.9338
		36.4628		23.9656	--				48.8299		32.5077
		42.6103		23.3612					57.4815		33.9188
		29.3851		--					37.7663		30.7455
		26.1275							34.7782		28.9165
Figure 6K	Time (hr)	HCT116	SEM	HCT116 mtTEMPO	SEM	NCLX KO #33	SEM	NCLX KO #33 mtTEMPO	SEM
	0	1	0	1	0	1	0	1	0
	24	2.3249	0.19133	2.52924	0.28272	2.10048	0.19236	2.01785	0.179
	48	6.60256	0.37107	6.47755	0.17718	4.99529	0.12512	4.60729	0.34046
	72	12.1734	0.47124	11.63	0.17822	6.66439	0.16581	6.49433	0.36066
