# Supplementary material for: Dichotomous role of the human mitochondrial Na+/Ca2+/Li+ exchanger NCLX in colorectal cancer growth and metastasis
Source: eLife. 2020 Sep 11;9:e59686. doi: 10.7554/eLife.59686 (PMC7529464; doi:10.7554/eLife.59686)
Supplement: Figure 7—figure supplement 1—source data 1. [file elife-59686-fig7-figsupp1-data1.xlsx]

## Sheet: Figure 7_figure supplement_1
Figure 7-figure supplement 1A, B
																				ALDOA				HK2				LDHA
																			HCT116	NCLX KO #37	NCLX KO #59		HCT116	NCLX KO #37	NCLX KO #59		HCT116	NCLX KO #37	NCLX KO #59
																			1	1.39148	1.19286		1	1.5347	1.40771		1	1.85283	1.60455
																			1	1.20604	1.16043		1	1.30406	1.38351		1	1.46642	1.37135
																			1	1.27748	1.11631		1	1.70046	1.65157		1	1.3372	1.20721
																			1	1.38543	1.20888		1	1.60308	1.30838		1	1.6	1.46769
																										ALDOA					HK2					LDHA
Figure 7-figure supplement 1C, D																								DLD1	NCLX KO#6	NCLX KO #24	NCLX KO #32		DLD1	NCLX KO#6	NCLX KO #24	NCLX KO #32		DLD1	NCLX KO#6	NCLX KO #24	NCLX KO #32
																								1	1.19734	1.13413	1.43094		1	1.70115	1.77626	1.71755		1	1.38262	1.43688	1.43245
																								1	1.26017	1.38858	1.62763		1	1.28586	1.09324	1.15849		1	1.26877	1.33372	1.3793
																								1	1.04062	1.41791	1.12539		1	1.2353	1.85773	1.75271		1	1.24046	1.4553	1.66012
																								1	1.33985	1.33422	1.33828		1	1.84861	1.17086	1.47961		1	1.34675	1.37835	1.4579
																								1			1.23852
Figure 7-figure supplement 1E, F																									ALDOA					HK2				LDHA
																							Scramble HCT	shNCLX HCT #2	shNCLX HCT #3	shNCLX HCT116 #2+3		Scramble HCT	shNCLX HCT #2	shNCLX HCT #3	shNCLX HCT116 #2+3		Scramble HCT	shNCLX HCT #2	shNCLX HCT #3	shNCLX HCT116 #2+3
																							1	1.43322	1.71898	1.45873		1	1.7887	2.02047	1.90178	--	1	1.66738	1.80664	1.50065
																							1	1.43301	1.47971	1.44038		1	1.91681	1.8919	1.71577	--	1	1.65437	1.61865	1.7472
																							1	1.55342	1.55249	1.59606		1	1.84993	1.54983	1.63592	--	1	1.59004	1.68654	1.79109
																							--	--	--	--
																							--	--	--	--
																							--	--	--	--
																							--	--	--	--
																							--	--	--	--
																							--	--	--	--
																							--	--	--	--
																							--	--	--	--
Figure 7-figure supplement 1G		G6PD			PGD			TKT
		HCT116	NCLX KO #33		HCT	NCLX KO #33		HCT	NCLX KO #33
		1	0.18052		1	0.33914		1	0.17737
		1	0.1301		1	0.15966		1	0.11385
		1	0.28798		1	0.13344		1	0.16884
Figure 7-figure supplement 1H		Time	DLD1	SEM	NCLX KO #06	SEM	NCLX KO #24	SEM	NCLX KO #32	SEM
		1.38058	18.9616	0.70239	28.0386	1.10655	32.0457	1.21235	31.5854	1.33747
		9.89492	19.4892	0.63277	27.9557	0.87331	32.0217	1.15747	31.6845	1.27948
		18.4062	19.2394	0.63826	27.9444	0.8019	31.556	1.26959	31.119	1.42083
		27.0222	99.7874	2.92279	146.847	7.08174	193.818	6.23885	168.942	5.8304
		35.536	114.822	3.38843	167.503	8.26244	208.697	7.05452	182.33	5.85431
		44.047	122.7	3.44305	180.355	8.77462	216.905	7.33844	192.592	6.06957
		52.6565	185.608	6.402	255.402	12.1638	293.803	15.2976	280.702	8.77595
		61.1605	188.1	6.33539	261.707	12.2964	291.783	14.4023	286.236	8.42134
		69.6697	187.024	6.11819	262.843	11.7965	288.69	13.9156	287.911	8.552
		78.281	26.3129	1.00911	43.8172	2.60678	41.926	3.44615	48.8715	2.77214
		86.7855	21.6039	0.32818	36.8824	1.73664	36.0448	2.55629	39.7293	1.94349
		95.2884	21.7398	0.47289	36.3436	1.59325	36.0662	2.29002	39.3906	1.79878
Figure 7-figure supplement 1I		0 hr									24 hr									48 hr									72 hr
		DLD1	SEM	NCLX KO #06	SEM	NCLX KO #24	SEM	NCLX KO #32	SEM		DLD1	SEM	NCLX KO #06	SEM	NCLX KO #24	SEM	NCLX KO #32	SEM		DLD1	SEM	NCLX KO #06	SEM	NCLX KO #24	SEM	NCLX KO #32	SEM		DLD1	SEM	NCLX KO #06	SEM	NCLX KO #24	SEM	NCLX KO #32	SEM
		1	1	1	1	1	1	1	1		6.53098	1.67925	4.15616	2.04289	4.30573	4.56126	2.93655	2.27178		20.364	4.20109	17.2217	5.41474	14.6278	10.4229	9.15052	6.39398		76.2529	7.13655	26.1191	6.97939	49.8247	13.4857	21.9885	7.81183
		1	1	1	1	1	1	1	1		6.74024	3.36816	5.35125	1.67286	6.13777	2.74506	5.31396	1.66021		21.9867	10.9934	18.7107	4.31488	22.1215	7.24032	18.7144	4.88913		59.2574	13.0132	29.8208	4.58732	47.123	10.6627	43.1156	5.9445
		1	1	1	1	1	1	1	1		4.69949	3.26538	5.76437	2.38768	4.41309	3.20179	2.69331	1.81063		16.9467	8.27353	12.4515	6.16678	12.7425	7.18102	9.6825	4.7423		57.8439	10.123	26.5042	5.66375	35.9445	7.04838	19.529	4.8596
		1	1	1	1	1	1	1	1		3.78874	3.25247	4.43565	1.70176	4.67563	2.5236	3.13494	2.02257		13.9138	5.44223	11.1462	5.01585	15.7997	5.09265	10.585	3.68498		35.7952	10.4131	24.3557	3.92543	20.9634	6.59111	19.4082	3.34761
		1	1	1	1	1	1	1	1		1.48877	1.84635	3.76473	2.21789	1.84744	2.90582	5.05636	3.87466		12.8172	8.12408	15.8931	10.4272	8.96223	7.25079	20.5356	13.2312		32.3543	13.527	35.6642	12.6619	18.2572	16.3124	35.4309	27.4685
		1	1	1	1	1	1	1	1		4.48436	2.11085	4.53844	3.36339	2.19118	2.60157	2.62971	1.57941		19.9122	11.9856	19.5968	7.87018	12.1619	8.01098	18.3459	5.97214		67.3824	18.0278	35.1538	11.7626	34.3738	19.309	43.6724	21.9979
		1	1	1	1	1	1	1	1		2.55923	1.28946	3.566	1.90331	2.08526	3.54415	6.06025	5.07098		19.3885	4.76607	15.4905	5.06037	9.78763	8.99674	16.717	7.63852		42.5422	8.25545	19.658	9.71796	29.9332	8.2622	37.8864	4.3055
		1	1	1	1	1	1	1	1		2.15551	2.5042	4.33555	2.04255	2.73261	3.39126	9.96854	1.68769		14.1261	6.73125	20.0488	6.4381	14.8958	8.84919	12.22	5.40877		31.0515	13.3814	22.7411	10.0989	29.5841		39.1273	11.662
Figure 7-figure supplement 1J		normal	2DG		normal	2DG		normal	2DG		normal	2DG
				24 hr						24 hr
		DLD1	DLD1		NCLX KO #6	NCLX KO #6		NCLX KO #24	NCLX KO 24		NCLX KO 32	NCLX KO 32
		45.9379	46.9112		59.1706	33.7887		61.0403	66.7997		53.573	56.5746
		51.267	65.2576		65.4463	54.9207		68.2083	64.008		63.9232	63.9232
		54.485	51.5376		60.6142	58.6479		80.2149	66.3448		74.8492	74.8492
		60.099	60.121		42.7872	54.8239		82.3146	70.6224		74.7727	74.7727
		53.0319	56.1393		73.903	45.7238		97.6937	66.5831		84.7439	56.703
		54.4936	62.0113		73.4261	48.1726		89.0341	73.8416		72.6121	58.5414
		63.3482	87.5186		63.645	79.6327		69.1456	62.9496		96.858	63.7233
		57.1007	90.5179		90.6082	67.8474		92.6453	62.1736		90.413	63.5486
		34.2549	79.0031		89.5114	72.3938		100	74.1007		100	84.536
		35.6219	86.5634		91.2922	80.3884		100	71.1429		100	82.7682
		61.9607			52.5135	78.7195		--			--
		68.5743			90.6047	87.3863		--			--
		67.1573			75.9321						--
		71.7658			77.3938	--					--
