# Supplementary material for: Dichotomous role of the human mitochondrial Na+/Ca2+/Li+ exchanger NCLX in colorectal cancer growth and metastasis
Source: eLife. 2020 Sep 11;9:e59686. doi: 10.7554/eLife.59686 (PMC7529464; doi:10.7554/eLife.59686)
Supplement: Figure 7—source data 1. [file elife-59686-fig7-data1.xlsx]

## Sheet: Figure 7
Figure 7A
	GLUT1					HK2						GPI					ALDOA					ENO1					LDHA
	HCT	NCLX KO# 33	NCLX KO#37	NCLX KO#59		HCT	NCLX KO# 33	NCLX KO#37	NCLX KO#59			HCT	NCLX KO# 33	NCLX KO#37	NCLX KO#59		HCT	NCLX KO# 33	NCLX KO#37	NCLX KO#59		HCT	NCLX KO# 33	NCLX KO#37	NCLX KO#59		HCT	NCLX KO# 33	NCLX KO#37	NCLX KO#59
	1	2.14914	2.86095	2.5896		1	1.35674	4.80262	2.27761			1	1.65487	5.01217	3.99194		1	1.32866	2.81638	1.53329		1	1.56276	5.23433	3.07788		1	2.03609	6.2495	5.59552
	1	1.81236	3.27448	1.97876		1	1.24384	5.78607	1.55095			1	1.814	8.00639	3.45547		1	1.43432	4.41959	1.65291		1	1.33218	7.47888	2.73647		1	1.1502	3.77627	2.97989
	1	1.5737	3.31589	1.98512		1	1.24605	3.46433	1.79492			1	1.39948	4.91514	3.3867		1	1.20666	2.48398	1.51188		1	1.63626	5.03179	3.02049		1	1.23126	3.14527	2.72033
Figure 7B
Figure 7C	ALDOA			HK2			LDHA
	HCT116	NCLX KO #33		HCT116	NCLX KO #33		HCT116	NCLX KO #33
	1	1.34707		1	1.81844		1	2.37777
	1	1.57868		1	2.02507		1	1.77172
	1	1.56527		1	1.53584		1	1.70874
				--	--		1	1.51319
							1	1.39717
							1	1.5277
Figure 7D	HCT116	NCLX KO #33	NCLX KO #37	NCLX KO #59
	70.644	200.693	383.451	448.889	--		--	--		--		--
	43.4322	299.758	570.821	565.626			--
	90.0627	346.445	642.046	612.95			--
	95.2938						--			--
	41.8877						--			--
	216.536
	211.567
Figure 7E	DLD1	NCLX KO#6	NCLX KO #24	NCLX KO #32
	183.849	234.199	206.851	250.813
	159.532	193.406	280.644	257.955
	157.017	251.14	280.692	283.889
	181.524	240.442	268.278	243.683
	162.384	255.305	274.771	247.62
Figure 7F	HCT116	NCLX KO #33		HCT116	NCLX KO #33		HCT116	NCLX KO #33
	Glutamine	Glutamine		FA	FA		Glucose	Glucose
	16.79	9.044		47.88	34.5		28.66	60.67
	14.28	27.47		47.34	36.92		46.9	54.38
	12.77	22.36		38.32	36.24		35.54	52.98
Figure 7G, H		Glucose					Lactate
	HCT116	NCXL KO #33	NCLX KO #37	NCLX KO #59		HCT116	NCXL KO #33	NCLX KO #37	NCLX KO #59
	1.82781	2.48291	3.60705	2.62465		1.60506	5.89753	5.94073	5.11307
	1.80924	2.60718	3.57486	2.7761		1.61409	5.84529	5.93079	5.06924
	1.72892	2.83182	3.64074	2.67141		1.65505	5.83587	5.928	5.11342
	1.90762	1.91794	4.35992	2.33917		1.72061	5.9491	6.85263	4.64557
	1.93469	2.13667	4.22913	2.63688		1.70567	5.94256	6.92163	4.56426
	1.93066	1.86787	4.34068	2.52366		1.70929	5.99308	6.93901	4.58332
	1.78289	2.1946	3.88938	2.91705		1.5214	6.44515	6.72583	5.3507
	1.80303	2.55731	3.73288	2.82916		1.50095	6.33408	6.749	5.36772
	1.08176	2.58061	3.80755	2.80666		1.74234	6.28707	6.75032	5.35506
	0.95681	1.79445	3.12516	2.3088		1.93116	6.11265	6.14564	5.29229
	1.04433	2.29759	4.02955	2.28954		2.00702	5.94532	7.03183	4.71144
	0.82906	1.61089	3.36805	2.64696		1.80982	6.59693	6.98472	5.47093
Figure 7I, J		Glucose							Lactate
	DLD1	NCLX KO #06	NCLX KO #24	NCLX KO #32			DLD1	NCLX KO #06	NCLX KO #24	NCLX KO #32
	1.86	3.37392	2.63056	2.87052			2.37186	5.71357	4.84869	6.02303
	1.91939	3.32578	2.6607	2.96042			2.39576	5.73444	4.77798	6.07951
	1.87691	3.24195	2.63032	2.96101			2.43155	5.80586	4.7947	6.07615
	1.77423	2.96446	2.37209	2.86743			2.38426	4.93484	4.17696	6.03983
	2.21257	2.94113	2.36435	2.99062			2.16179	4.93689	4.18051	6.0387
	1.85528	2.94008	2.32575	3.12763			2.34341	4.92498	4.21711	6.005
	1.73724	3.08704	2.3978	2.20938			2.38365	5.56864	4.63521	6.39276
	1.72488	3.11448	2.37875	2.56422			2.3735	5.55357	4.63477	6.22428
	1.70215	2.98085	2.38378	2.40677			2.38385	5.6566	4.6288	6.35539
Figure 7K				0 hr										24 hr								48 hr											72 hr
	HCT	HCT 2DG	NCLX KO #33	NCLX KO #33 2DG	NCLX KO #37	NCLX KO #37 2DG	NCLX KO #59	NCLX KO #59 2DG		HCT		HCT 2DG	NCLX KO #33	NCLX KO #33 2DG	NCLX KO #37	NCLX KO #37 2DG	NCLX KO #59	NCLX KO #59 2DG		HCT	HCT 2DG	NCLX KO #33	NCLX KO #33 2DG	NCLX KO #37	NCLX KO #37 2DG	NCLX KO #59	NCLX KO #59 2DG		HCT	HCT 2DG	NCLX KO #33	NCLX KO #33 2DG	NCLX KO #37	NCLX KO #37 2DG	NCLX KO #59	NCLX KO #59 2DG
	1	1	1	1	1	1	1	1		3.17942		2.46338	1.89326	1.71883	1.24507	1.26793	3.17352	3.15877		9.89281	4.76846	2.18975	2.53375	3.25789	3.2557	6.72577	6.03147		17.274	7.17742	2.5555	2.26009	5.64942	3.35674	9.74642	7.0355
	1	1	1	1	1	1	1	1		2.76243		2.44456	1.95391	1.56085	1.10355	1.68653	3.52054	2.93401		8.02466	6.84054	2.22343	2.33833	3.32742	3.24898	6.58668	5.193		11.3752	7.16938	2.53126	2.20497	3.91181	4.15045	7.94145	5.77748
	1	1	1	1	1	1	1	1		2.69415		1.47698	1.66886	1.64291	1.69125	1.8773	2.6127	2.52013		10.2853	4.7977	2.18851	2.19616	3.83678	3.44261	5.02831	4.15656		12.3419	6.74787	2.3634	2.42341	9.31636	5.88404	5.61665	5.71755
	1	1	1	1	1	1	1	1		3.20838		1.99624	1.65596	1.52119	1.50337	2.14641	2.74884	2.82759		9.7435	5.73072	1.99783	2.08892	3.00183	5.01085	5.42503	4.99566		12.6524	6.41466	2.49194	2.6411	4.91336	6.65097	8.37124	5.03015
	1	1	1	1	1	1	1	1		2.1865		4.20325	3.8218	3.87927	2.5719	4.13998	3.03383	4.14517		6.52845	8.81893	7.01834	8.0259	3.69611	4.853	3.38955	3.68513		18.6276	11.3334	8.98526	10.0265	4.8919	4.96426	4.04756	4.65151
	1	1	1	1	1	1	1	1		5.91263		3.82454	3.17876	3.9849	3.41182	3.41432	3.58631	3.88237		14.2951	7.82356	6.93284	7.45002	4.37978	3.5543	4.92541	3.16225		9.49587	5.0865	8.32943	7.55237	4.29211	4.12465	4.66578	4.24209
	1	1	1	1	1	1	1	1		3.15		3.90692	3.36202	3.33894	2.54399	2.60138	2.32888	2.58137		7.63119	5.72952	5.60619	6.88996	3.5441	2.27108	2.64973	2.67204		7.44684	5.42533	5.59123	5.58719	4.89797	3.34341	2.98512	3.01769
	1	1	1	1	1	1	1	1		3.30108			4.01894	2.90741	2.5911	2.59021	2.21533	3.18668		7.61536		7.11677	4.35417	2.73277	2.37526	2.22365	2.5514				6.62644	4.92483	3.36091	3.02608	2.82735	2.97866
Figure 7M	normal	2DG		normal	2DG		normal	2DG		normal		2DG
			24 hr						24 hr
	HCT116	HCT116		NCLX KO #33	NCLX KO #33		NCLX KO #37	NCLX KO #37		NCLX KO #59		NCLX KO #59
	64.4253	100		100	74.3669		72.013	70.909		86.1333		82.3731
	57.7101	100		100	70.5544		75.9301	74.8483		88.1415		74.7988
	55.0093	100		100	68.0095		64.318	79.5614		100		77.0283
	57.3401	100		100	60.5692		66.2656	89.6981		100		69.3335
	63.4703	62.5593		100	73.2403		80.3056	71.3948		87.5946		76.2219
	64.0481	65.6783		100	68.4101		92.2091	87.8331		73.1658		77.4413
	59.029	62.043		63.2544	78.1566		58.6996	72.2559		65.6107		74.8779
	67.8507	67.3972		62.5563	71.3707		55.78	64.2486		66.8209		75.5242
	50.6345	56.5443		73.3204	71.1953		69.4324	73.2707		78.243		82.3334
	52.6369	55.7331		70.2692	63.4095		78.1977	68.3052		77.9519		83.8296
	61.45	56.1942		70.0362	62.6295		67.4649	67.2818		77.9062		80.0397
	62.466	57.927		67.6792	69.4415		63.1551	61.7844		76.3827		71.7995
	53.0562	63.1322		55.2878	72.3192		70.3558	45.3006		85.2176		75.4294
	57.4091	58.7495		62.1786	69.8069		100	39.5775		88.8837		82.833
	52.7589	52.363		55.8014	57.7262		100	49.895		98.0905		34.0286
	62.9812	55.799		64.943	78.7003		100	42.3875		97.9034		79.4686
	73.4852			82.1912	--		100	66.6847		81.1053		72.2257
	75.7896			83.7348	--		78.0431	66.976		76.1432		--
	80.5633	--		71.5618	--		79.7783	63.3869		97.6059		--
	74.4473	--		74.9095	--		57.1895	11.5022		100		--
	64.3365	--		86.1803	--		69.3474	4.80254		78.2597		--
	76.3421	--		80.4343	--		60.3369	51.3429		76.5954		--
	73.4852	--		--			70.8962	73.6356		--
	75.7896	--		--			--	47.0301		--
	80.5633			--			--	46.1835		--
	74.4473			--			--			--
	--			--			--			--
