# Supplementary material for: Dichotomous role of the human mitochondrial Na+/Ca2+/Li+ exchanger NCLX in colorectal cancer growth and metastasis
Source: eLife. 2020 Sep 11;9:e59686. doi: 10.7554/eLife.59686 (PMC7529464; doi:10.7554/eLife.59686)
Supplement: Source data 1. [file elife-59686-data1.xlsx]

## Sheet: KO_up_vs_WT
gene	logFC	AveExpr	t	P.Value	adj.P.Val	B
NDRG1	4.8876	9.96789	39.0288	4.89114e-12	4.9787e-08	17.6275							Genes upregulated in NCLX KO cells (fold increase)
ANGPTL4	5.05424	7.61616	31.7818	3.57199e-11	1.81796e-07	15.6959
STC2	3.57285	8.24777	27.5388	1.42416e-10	4.83218e-07	14.7554
EGR1	3.76566	8.36089	25.2749	3.25231e-10	5.90417e-07	13.9678
DDIT4	3.5821	8.80324	25.2747	3.25264e-10	5.90417e-07	14.0757
ANKRD37	5.2018	6.09234	25.0975	3.48021e-10	5.90417e-07	13.2911
TMEM158	3.07263	7.51692	22.279	1.09168e-09	1.56278e-06	12.8971
ADM	2.77657	9.32169	22.0064	1.22824e-09	1.56278e-06	12.822
HILPDA	3.05968	8.09913	20.2478	2.72289e-09	3.07959e-06	12.0579
PLIN2	2.66486	7.64019	19.7671	3.42419e-09	3.48548e-06	11.8235
GDF15	2.16553	10.9875	19.4317	4.03083e-09	3.72998e-06	11.7039
JUN	2.94315	6.82879	18.566	6.21872e-09	5.27503e-06	11.201
P4HA1	2.98387	7.45781	18.4098	6.73886e-09	5.27652e-06	11.1484
SLC2A3	5.9003	4.50278	17.6701	9.94471e-09	7.23051e-06	9.71143
FUT11	2.70738	6.49075	17.2275	1.2646e-08	8.5816e-06	10.5246
ENO2	3.04348	6.91355	16.9819	1.44869e-08	9.10737e-06	10.4166
LOXL2	3.12089	5.83865	16.8946	1.52103e-08	9.10737e-06	10.2993
ALDOC	3.26545	6.40363	16.7381	1.66086e-08	9.39215e-06	10.2522
ERRFI1	2.33332	8.386	16.534	1.86498e-08	9.9914e-06	10.1765
JUNB	2.2917	7.57212	15.6862	3.06304e-08	1.55893e-05	9.68713
CYR61	4.51937	5.09217	15.5734	3.27838e-08	1.58908e-05	9.42305
DDIT3	3.00216	5.28427	15.416	3.60675e-08	1.66878e-05	9.40966
FOSL2	3.17744	6.22021	15.1393	4.27555e-08	1.89221e-05	9.33836
PLOD2	2.79469	5.78914	14.9668	4.76091e-08	2.01922e-05	9.20528
IER2	1.99593	8.79534	14.5938	6.03094e-08	2.45556e-05	8.98755
BHLHE40	4.34262	3.82902	14.3223	7.18877e-08	2.7272e-05	8.22008
PDGFA	2.71251	5.7854	14.3127	7.23395e-08	2.7272e-05	8.80148
PLAUR	2.87252	7.02597	14.1458	8.0712e-08	2.93417e-05	8.70778
AKAP12	1.48029	11.3073	13.9723	9.05666e-08	3.10613e-05	8.51384
ELF3	2.21436	5.93135	13.9562	9.15452e-08	3.10613e-05	8.60108
HPCAL1	1.71215	8.7947	13.7044	1.08464e-07	3.56146e-05	8.39406
MT-TL1	2.76832	8.17744	13.5184	1.23167e-07	3.91788e-05	8.29657
MT2A	1.5842	11.0467	13.4078	1.32948e-07	3.97396e-05	8.10578
VEGFA	2.46668	5.54772	13.3758	1.35929e-07	3.97396e-05	8.19052
FOS	4.24307	4.68964	13.3567	1.37748e-07	3.97396e-05	7.9765
NEAT1	1.72872	7.91117	13.3278	1.40547e-07	3.97396e-05	8.14751
PIM1	3.26517	5.51308	13.1752	1.56391e-07	4.30244e-05	8.06891
FAM162A	1.88901	8.44027	12.9268	1.86556e-07	4.99725e-05	7.86351
TSC22D3	2.0837	6.16822	12.706	2.18794e-07	5.71053e-05	7.73552
ARRDC3	2.91881	6.62924	12.5855	2.38926e-07	6.08006e-05	7.65133
COL13A1	2.76686	4.69622	12.334	2.87812e-07	6.99665e-05	7.41317
BNIP3	1.96898	6.40163	12.2993	2.95367e-07	6.99665e-05	7.43987
HK2	2.53614	6.04869	12.2984	2.95565e-07	6.99665e-05	7.43745
MT-CO1	1.29459	11.124	12.2538	3.05631e-07	7.0705e-05	7.22429
DKK1	4.0018	4.2707	12.1864	3.21542e-07	7.27328e-05	7.12258
PLXNA3	2.04054	5.57012	12.1208	3.37902e-07	7.39787e-05	7.30572
PDK1	2.27298	5.46563	12.1065	3.41585e-07	7.39787e-05	7.29695
FOSB	3.45062	4.18225	12.0656	3.52387e-07	7.47281e-05	7.16789
SEMA4B	2.60961	5.50934	11.8353	4.20577e-07	8.73684e-05	7.08837
SLC2A1	1.97473	8.59488	11.744	4.51513e-07	9.11576e-05	6.92477
SERPINE1	2.63663	5.00712	11.7293	4.56728e-07	9.11576e-05	7.00151
MT-ND6	2.21514	8.23004	11.6091	5.01898e-07	9.82465e-05	6.83881
CHAC1	3.09346	4.82408	11.5528	5.2468e-07	0.000100768	6.86599
SESN2	1.70999	6.537	11.3963	5.94331e-07	0.000112031	6.7057
IGFBP3	4.5764	2.70271	11.1933	7.00141e-07	0.000129577	5.94042
SERTAD2	1.8751	6.39995	10.8827	9.04157e-07	0.000159499	6.30254
AGPAT4	2.07653	4.94619	10.8765	9.08828e-07	0.000159499	6.33435
PGK1	1.33094	9.81903	10.7713	9.92549e-07	0.000169899	6.07195
DUSP5	2.19055	7.76734	10.7607	1.00147e-06	0.000169899	6.16068
WSB1	1.84655	6.03253	10.6928	1.06053e-06	0.000176969	6.16176
EMP1	2.22282	5.56541	10.6694	1.08168e-06	0.000177031	6.16244
SAT1	1.18656	11.2598	10.6538	1.09613e-06	0.000177031	5.89208
ALDOA	1.3819	9.33169	10.6357	1.11307e-06	0.000177031	5.97914
KIAA0040	1.85131	7.03876	10.5296	1.21869e-06	0.000190846	5.97352
PFKFB4	2.95414	4.51972	10.4524	1.30237e-06	0.000199043	5.97365
BCL3	2.01059	5.51726	10.4243	1.33428e-06	0.000199043	5.94902
LUCAT1	5.5049	0.290506	10.4114	1.34925e-06	0.000199043	4.88901
NR4A2	2.56025	4.16638	10.3506	1.42239e-06	0.0002052	5.8569
LINC00659	3.31718	3.76482	10.2961	1.4916e-06	0.000210875	5.77633
PDLIM5	1.58857	7.94383	10.265	1.53278e-06	0.000212753	5.68983
MT1X	2.83467	5.5976	10.2547	1.54669e-06	0.000212753	5.76766
MT-TE	4.55122	3.18144	10.1451	1.7034e-06	0.00022453	5.46273
QSOX1	1.43787	7.40045	10.1252	1.73376e-06	0.00022453	5.54412
MXI1	1.69529	6.57791	10.1194	1.7426e-06	0.00022453	5.63563
MT-TP	3.68372	5.82422	10.0536	1.84772e-06	0.000232197	5.63065
SLC20A1	1.44164	7.55555	9.98157	1.9706e-06	0.000241758	5.43772
ANKZF1	1.72304	6.09803	9.98117	1.97131e-06	0.000241758	5.50228
GOLGA8A	2.59406	4.64951	9.89201	2.13611e-06	0.000255809	5.49303
TNFRSF10D	1.99474	5.60521	9.89199	2.13614e-06	0.000255809	5.46589
P4HA2	1.63619	6.36245	9.87536	2.16852e-06	0.000256667	5.40363
DUSP4	1.44408	7.41475	9.84403	2.23098e-06	0.000260397	5.32371
SLCO4A1	1.67668	7.65988	9.83409	2.2512e-06	0.000260397	5.267
TMEM45A	2.0487	5.0815	9.80824	2.30474e-06	0.000263595	5.40742
MT-TF	1.82435	8.02533	9.78241	2.35962e-06	0.000266873	5.21319
HIVEP2	2.54191	4.12824	9.71051	2.52009e-06	0.000278826	5.33235
CSRNP1	2.49848	3.95423	9.59969	2.79128e-06	0.00030551	5.23165
ATF3	2.31745	3.71395	9.57654	2.85187e-06	0.000308821	5.20891
SNORA12	1.9586	7.45408	9.44585	3.22199e-06	0.000345228	4.88604
ERO1A	1.55223	6.92432	9.43051	3.2688e-06	0.000346594	4.96245
SCARNA9	4.48234	2.46095	9.41124	3.32859e-06	0.000349296	4.7536
CXCR4	3.80558	2.66569	9.30969	3.66424e-06	0.000376751	4.72604
SHC2	3.02175	2.68385	9.28824	3.73978e-06	0.000380672	4.85199
TNFAIP8	1.62063	6.43041	9.22337	3.97874e-06	0.000394851	4.7812
ACAP1	3.39779	2.66826	9.22219	3.98323e-06	0.000394851	4.78241
SLC45A1	2.48746	4.0586	9.20891	4.03424e-06	0.000394851	4.87015
AREG	1.83627	9.41117	9.18592	4.12423e-06	0.000397703	4.61746
SDC4	1.72779	8.123	9.18157	4.14152e-06	0.000397703	4.63923
KCNN4	1.33103	7.40425	9.16177	4.22114e-06	0.000401561	4.60536
RIOK3	1.96399	5.5479	9.10928	4.44045e-06	0.000416354	4.74715
IRF2BPL	1.15135	8.98018	9.05413	4.68437e-06	0.000429251	4.44457
PPP1R3B	2.66187	3.81301	9.04567	4.72307e-06	0.000429251	4.68882
C4orf3	1.76936	6.44446	8.9833	5.01931e-06	0.000449653	4.55429
SEMA3A	1.44543	6.64067	8.97768	5.04699e-06	0.000449653	4.51787
NR1D1	2.68869	3.41436	8.9449	5.2118e-06	0.000452787	4.58629
IRS2	1.62475	5.80091	8.93767	5.24893e-06	0.000452787	4.53792
CTGF	3.82213	2.45141	8.90202	5.43624e-06	0.0004602	4.22709
GADD45B	1.93079	5.15577	8.89565	5.4705e-06	0.0004602	4.49959
NFIL3	1.48415	5.74433	8.84	5.77981e-06	0.000482235	4.42358
ASNS	1.32888	7.49956	8.81758	5.90976e-06	0.000489068	4.3161
GPI	1.59238	8.81286	8.77812	6.14631e-06	0.000500506	4.21197
NAB2	1.49398	6.55524	8.7645	6.23039e-06	0.000503326	4.28812
ZFYVE28	1.70725	5.3518	8.70883	6.58711e-06	0.000527954	4.28235
TMEM59L	1.41368	5.74407	8.69084	6.70708e-06	0.00053337	4.22565
BNIP3L	1.61549	6.49352	8.62308	7.18095e-06	0.000563576	4.18415
MIDN	1.15472	8.09284	8.6184	7.215e-06	0.000563576	4.04665
BCAR3	2.00113	4.59632	8.59765	7.36813e-06	0.000568183	4.25741
ASPH	1.53258	8.88116	8.58162	7.48884e-06	0.00057315	3.98564
CAPRIN2	1.62591	5.5038	8.52322	7.94715e-06	0.000603687	4.09506
SNORA79	3.17658	4.36621	8.49257	8.19984e-06	0.000618268	4.1692
FAM110C	1.77943	4.97528	8.45554	8.51691e-06	0.000637453	4.10506
DUSP6	2.19987	10.9301	8.44527	8.60721e-06	0.000639509	3.73992
ZFP36L1	1.11802	9.24452	8.41097	8.91636e-06	0.000655753	3.77576
PLEKHA2	1.6002	5.03817	8.40681	8.95467e-06	0.000655753	4.02327
PTPRH	2.77192	2.58176	8.34247	9.57068e-06	0.000695857	3.98562
SERPINB1	1.19923	7.00122	8.31582	9.83923e-06	0.000707621	3.77111
HK1	1.16293	7.33314	8.30592	9.94104e-06	0.000707621	3.71636
NR2F1	1.54318	6.80483	8.26757	1.03466e-05	0.000731374	3.78908
HES1	1.45542	5.91753	8.25303	1.0505e-05	0.000737452	3.80897
KRT15	1.95832	4.64008	8.20462	1.10518e-05	0.000770523	3.8652
APOBEC3G	3.68316	1.85174	8.14822	1.17282e-05	0.000812121	3.50085
LAMB2	1.60011	4.65307	8.13982	1.18328e-05	0.000813825	3.73821
HELZ2	1.6728	4.71823	8.10632	1.22601e-05	0.000837551	3.68332
IRF2BP2	1.31863	6.2137	8.06184	1.28534e-05	0.000861701	3.58214
SERPINE2	1.03377	8.58723	8.04807	1.30433e-05	0.000861701	3.40914
ISG20	2.4502	3.14451	8.04252	1.31207e-05	0.000861701	3.70871
EGFR	1.68459	5.24136	8.03912	1.31685e-05	0.000861701	3.65842
EGLN3	2.98419	3.74867	8.03775	1.31877e-05	0.000861701	3.71548
PPP1R15A	1.67229	5.38417	8.02875	1.33151e-05	0.000863275	3.61938
CAMK1D	2.0978	4.06722	7.99762	1.3766e-05	0.000883079	3.66148
PHLDA1	0.873539	10.2631	7.99572	1.3794e-05	0.000883079	3.21153
NR4A1	3.75233	2.72188	7.9757	1.40934e-05	0.000896603	3.50591
SH3D21	2.16128	3.25149	7.95482	1.44132e-05	0.000900073	3.62731
KDM3A	2.63454	6.44888	7.93769	1.46814e-05	0.00091123	3.44622
KLF4	3.22604	3.025	7.92374	1.49039e-05	0.000919434	3.51618
MALAT1	2.0676	10.8561	7.91739	1.50064e-05	0.000920182	3.12487
LDHA	1.25429	9.18949	7.90549	1.52005e-05	0.000923239	3.22192
RIMKLA	2.06712	3.94557	7.90323	1.52377e-05	0.000923239	3.55516
APOBEC3D	3.60487	1.80234	7.83562	1.6397e-05	0.000949168	3.26043
BMP4	1.18419	7.93044	7.82908	1.65142e-05	0.000949168	3.19123
DCBLD1	1.43769	6.91082	7.8284	1.65264e-05	0.000949168	3.22642
EGR2	4.14451	2.32009	7.82799	1.65338e-05	0.000949168	3.31796
SCARNA13	2.01308	4.6187	7.82442	1.65981e-05	0.000949168	3.41462
SCARNA20	4.47113	0.301866	7.81411	1.67856e-05	0.000954528	2.91446
CHST15	1.33794	6.46617	7.77428	1.7532e-05	0.000982189	3.17451
PPFIA4	3.50873	2.80263	7.73556	1.82924e-05	0.00101195	3.363
MYO1D	1.23964	5.824	7.72551	1.84955e-05	0.00101392	3.17343
SERTAD1	1.2302	6.72853	7.72395	1.85274e-05	0.00101392	3.11352
SLC25A37	1.1484	7.51598	7.70343	1.89506e-05	0.00102605	3.05483
SHB	1.65864	5.05085	7.69744	1.90761e-05	0.00102739	3.24865
MCL1	1.09423	9.23244	7.68217	1.94003e-05	0.0010339	2.89929
MKNK2	1.39201	6.73773	7.66857	1.96941e-05	0.00104202	3.11149
GADD45A	1.90632	5.76468	7.60999	2.10157e-05	0.00109394	3.14281
GPRC5A	1.34036	8.75535	7.60792	2.10642e-05	0.00109394	2.86504
UPK1A-AS1	3.47001	2.50589	7.57427	2.18687e-05	0.00112996	3.13419
MAP1B	1.87686	4.38514	7.50748	2.35665e-05	0.00119345	3.10662
MRC2	1.93858	4.22274	7.4931	2.39506e-05	0.00120059	3.0977
ARL4C	1.31191	5.71624	7.49017	2.40295e-05	0.00120059	2.91413
MLXIPL	1.13954	6.54593	7.489	2.40613e-05	0.00120059	2.86849
PMEPA1	2.46874	3.22678	7.42608	2.58319e-05	0.0012581	3.06225
CDKN2B	1.994	3.96765	7.3949	2.67616e-05	0.00128375	2.99842
KLF6	1.91405	6.77395	7.39173	2.68581e-05	0.00128375	2.73504
SLC38A2	0.973148	9.07685	7.38791	2.69751e-05	0.00128375	2.58916
KCMF1	1.14979	6.74385	7.38335	2.71152e-05	0.00128375	2.73085
TNFRSF12A	1.54788	6.57966	7.29345	3.00465e-05	0.00138678	2.60612
DEPP1	2.08936	3.29241	7.25271	3.14868e-05	0.00143212	2.86881
IDS	1.35007	5.74389	7.25192	3.15153e-05	0.00143212	2.67974
ITGB5	0.925103	8.35352	7.23142	3.22691e-05	0.0014534	2.42712
INSIG2	2.75247	4.36169	7.22706	3.2432e-05	0.00145429	2.82791
FOXD1	1.82795	5.30773	7.21518	3.28801e-05	0.00146151	2.72119
SCARNA8	3.50147	2.00094	7.19406	3.36936e-05	0.00149116	2.58354
TUBA1A	1.48011	6.73782	7.16191	3.49738e-05	0.00154112	2.45246
SYT1	1.27052	7.24177	7.14788	3.55492e-05	0.00155303	2.41919
GDI1	1.16291	6.15374	7.14237	3.5778e-05	0.00155634	2.50363
ERICH2	3.10135	1.95243	7.12809	3.63783e-05	0.00157572	2.61453
TRIB3	1.36234	5.78097	7.11449	3.69597e-05	0.00159412	2.44943
AHNAK2	1.45423	4.99699	7.1032	3.74505e-05	0.00160172	2.53668
CPA4	1.64371	4.22595	7.08705	3.81646e-05	0.00162543	2.61549
SSH1	1.09887	7.6181	7.0356	4.05402e-05	0.00170402	2.30108
PNRC1	1.73703	4.77239	7.02548	4.10264e-05	0.00171151	2.53259
ZNF160	2.4052	3.24211	7.02184	4.12027e-05	0.00171185	2.61254
ST3GAL1	1.24437	5.25343	7.00912	4.18253e-05	0.00172364	2.36993
CCNI	0.959729	8.29946	7.00564	4.19971e-05	0.00172374	2.20126
PITPNC1	1.47409	5.73063	6.99531	4.25126e-05	0.0017251	2.35538
SLC7A11	1.85806	5.25916	6.99483	4.25367e-05	0.0017251	2.46216
BCL6	1.47408	4.98117	6.99479	4.25386e-05	0.0017251	2.45763
SPTSSB	1.64681	4.3007	6.94361	4.51973e-05	0.00179712	2.46286
EGR3	3.89738	1.85066	6.90873	4.71123e-05	0.00184445	2.30945
AHNAK	1.50973	7.2843	6.89059	4.81427e-05	0.00185623	2.09057
RNF217	1.39145	5.33026	6.87467	4.90673e-05	0.00187765	2.24453
SLC45A3	1.20896	5.55976	6.86215	4.98079e-05	0.00188112	2.17954
COL9A3	1.30632	6.63974	6.85179	5.043e-05	0.00188112	2.06777
KCTD11	1.73879	3.48821	6.8492	5.05868e-05	0.00188112	2.37952
DUSP2	1.5125	4.62287	6.84837	5.06369e-05	0.00188112	2.26464
SNORA11F	2.67357	3.21132	6.84507	5.0838e-05	0.00188112	2.41014
GBE1	1.42056	5.27297	6.84232	5.10059e-05	0.00188112	2.28658
CAPN12	2.48603	2.51874	6.83539	5.14316e-05	0.00188317	2.39492
TLE6	1.79847	3.80186	6.81963	5.24152e-05	0.00189841	2.34609
LPP	1.40568	4.82856	6.81653	5.26106e-05	0.00189841	2.22024
ATG16L2	1.50121	4.74162	6.79081	5.4266e-05	0.00193138	2.1673
RRAGD	1.39163	4.83736	6.78007	5.49736e-05	0.00194297	2.20025
ACTG1	0.964609	13.1361	6.77151	5.5545e-05	0.00195637	1.55919
PPFIBP1	1.29069	6.09317	6.7556	5.66243e-05	0.00198751	2.02723
PRAG1	1.51842	4.8092	6.73706	5.79102e-05	0.00202465	2.09973
LDLR	1.20679	6.56365	6.70251	6.03921e-05	0.00208383	1.91841
SIAH2	1.28135	5.70184	6.68918	6.13804e-05	0.00210305	1.98025
KDM4B	1.18884	5.24464	6.68594	6.16233e-05	0.00210305	1.9844
LINC01835	2.09626	3.42505	6.68391	6.17755e-05	0.00210305	2.21386
MYO1E	1.27917	6.60717	6.67773	6.22427e-05	0.00210821	1.87958
SOWAHC	1.21049	5.34698	6.67049	6.27955e-05	0.00211654	1.96966
H1F0	2.01168	8.90508	6.65509	6.39876e-05	0.00213551	1.75059
KRT13	2.44607	3.16271	6.64801	6.45447e-05	0.00214007	2.14631
MXD1	2.4858	2.54988	6.63097	6.59056e-05	0.00217809	2.16029
OSMR	1.64064	5.28456	6.61599	6.71276e-05	0.0022006	1.93938
CIB1	1.05814	6.7777	6.61207	6.74514e-05	0.0022006	1.77701
RPL17P50	3.92803	0.816095	6.58394	6.98251e-05	0.00225033	1.84369
DNAJB2	1.37574	5.47747	6.5591	7.1997e-05	0.00229018	1.76816
SCARNA11	4.20061	1.57933	6.55008	7.28033e-05	0.00229432	1.91924
PIM3	0.841432	9.33981	6.54549	7.32181e-05	0.00230027	1.52368
DDIT4L	1.48685	4.7393	6.51143	7.63719e-05	0.00237009	1.87027
ELK3	1.36615	5.84315	6.49933	7.75281e-05	0.00239866	1.72577
IL11	1.98535	2.88325	6.45202	8.22314e-05	0.00252119	1.93711
EHBP1	1.35184	5.03176	6.44055	8.34182e-05	0.00254989	1.76805
TRNP1	0.935967	6.69714	6.43166	8.43505e-05	0.00255013	1.46873
ID3	1.44052	8.62341	6.43092	8.44281e-05	0.00255013	1.41764
BTG1	1.13196	6.34167	6.39093	8.87678e-05	0.00262608	1.55864
LIMCH1	1.92464	4.11318	6.39003	8.88682e-05	0.00262608	1.78629
GAPDHP35	1.54463	4.45203	6.39	8.8872e-05	0.00262608	1.62703
NOL3	1.03555	5.93474	6.36995	9.11408e-05	0.00265206	1.49202
FOXC1	0.807546	8.78231	6.36952	9.11897e-05	0.00265206	1.27363
TRIM8	1.24141	5.45321	6.36554	9.16476e-05	0.00265317	1.58706
KIFC2	1.09114	6.22702	6.35087	9.33581e-05	0.00268444	1.43683
GOLGA8B	1.34698	5.2282	6.33537	9.52016e-05	0.00272207	1.58722
DGKH	1.59518	4.21111	6.32457	9.651e-05	0.00274406	1.65142
AATK	1.15569	5.24693	6.31712	9.74243e-05	0.00275772	1.50205
NOTCH3	1.62876	5.08092	6.31624	9.75321e-05	0.00275772	1.52008
TINAGL1	1.33366	5.84253	6.29862	9.97341e-05	0.00279025	1.51745
LINC02356	2.09236	3.04292	6.29826	9.97789e-05	0.00279025	1.74652
TNFRSF11A	2.66318	2.27936	6.29111	0.000100689	0.00279852	1.75263
PER1	1.6906	5.88094	6.28731	0.000101175	0.00279852	1.37284
MAGI1	0.983416	6.93285	6.28153	0.00010192	0.00280588	1.3091
SLC4A7	1.20796	6.23929	6.28097	0.000101992	0.00280588	1.40726
ZNF292	1.21598	5.51281	6.27383	0.000102922	0.00282384	1.49062
GAPDH	0.791035	11.4312	6.24965	0.000106138	0.00289645	1.00676
DUSP1	2.69593	3.17658	6.23155	0.000108617	0.00294584	1.68243
PHC2	1.09308	6.95002	6.23011	0.000108816	0.00294584	1.27891
SLC9A7	1.57607	4.57588	6.22261	0.000109863	0.0029663	1.50734
HMOX1	1.8061	5.52689	6.21143	0.000111445	0.00298803	1.37405
ERMP1	1.1799	5.68894	6.19798	0.000113381	0.00300549	1.37422
ITGA2	0.979401	6.78273	6.18883	0.000114719	0.00302501	1.26584
UCA1	1.03778	7.00894	6.18685	0.000115009	0.00302501	1.18454
SNTB1	1.47345	4.66992	6.1701	0.000117509	0.00308279	1.46336
ARL8A	1.03034	7.84243	6.16234	0.000118686	0.00310566	1.06975
ASAP2	1.50922	5.07913	6.15863	0.000119253	0.00311251	1.34224
ARHGAP45	1.10528	4.68367	6.1479	0.000120912	0.00313491	1.28692
TMOD1	1.64027	3.53347	6.14393	0.000121532	0.003136	1.44293
JDP2	1.29455	4.67696	6.1429	0.000121694	0.003136	1.33867
MRPS6	0.937298	6.99991	6.13422	0.000123062	0.00315082	1.12976
LGALS1	0.735033	9.13835	6.13337	0.000123197	0.00315082	0.946811
SMIM14	1.13678	6.38229	6.12871	0.000123939	0.00315393	1.19651
MT-TV	3.70264	2.79306	6.12077	0.000125217	0.0031706	1.40658
PDE9A	1.89454	5.41898	6.1157	0.000126038	0.0031756	1.19521
FAM3C	0.998221	7.05267	6.11293	0.00012649	0.00317755	1.17049
HOXB9	1.55169	3.92608	6.10679	0.000127498	0.00317755	1.45475
KDM7A	1.8333	4.39786	6.08988	0.000130319	0.00320416	1.31521
RPS27AP11	1.69997	2.72936	6.07739	0.000132446	0.00321326	1.35321
PTCHD4	1.89567	3.62132	6.07716	0.000132485	0.00321326	1.39852
ID1	1.52609	10.2614	6.07698	0.000132516	0.00321326	0.78698
UACA	1.22212	5.47136	6.07037	0.000133657	0.00323157	1.21526
SMAD3	1.03329	6.11897	6.06728	0.000134194	0.00323688	1.10938
FAM107B	1.04139	6.09699	6.04794	0.000137611	0.00326129	1.13455
PAM	0.966487	7.18005	6.03571	0.000139818	0.00329375	1.06466
SKIL	1.66373	4.33889	6.02004	0.000142702	0.00334692	1.33478
ATF4	0.766783	9.12597	6.01689	0.000143291	0.003353	0.848323
MET	0.992457	7.46967	5.97922	0.000150525	0.00347436	0.874999
WDR60	1.53278	4.00126	5.97244	0.000151869	0.00348169	1.241
BRSK1	1.77986	3.90078	5.96797	0.000152761	0.00348868	1.24054
DENND3	1.89534	3.20835	5.93808	0.000158876	0.00359378	1.26347
NCOR2	0.970586	6.96841	5.93081	0.000160405	0.00360992	0.819307
RALGDS	1.07156	5.84811	5.92671	0.000161273	0.00360992	0.93252
RARA	1.93562	4.22218	5.92619	0.000161382	0.00360992	1.26544
SCG2	1.55959	5.16394	5.91879	0.000162964	0.00361408	1.0721
TMSB10	0.657517	10.989	5.91877	0.000162969	0.00361408	0.578634
PAQR8	1.67267	3.54913	5.91099	0.000164649	0.00362676	1.22958
ABCC3	1.35454	4.66482	5.9096	0.000164951	0.00362676	1.02752
CHD2	1.24844	5.9547	5.90602	0.000165732	0.00362676	0.858037
SPEG	1.0579	5.35048	5.90465	0.000166033	0.00362676	0.908618
FHL2	1.00611	6.76114	5.89006	0.000169264	0.00368148	0.815769
SYT17	1.08557	4.81053	5.88162	0.000171165	0.00370699	0.95236
PLK3	1.07876	5.90234	5.87309	0.000173108	0.00373318	0.861037
ZNF337	1.25011	3.91758	5.85947	0.000176261	0.00378515	1.01512
FAM210A	1.22353	4.97384	5.82139	0.000185408	0.00395335	0.920297
EPHA2	2.25073	6.5892	5.81886	0.000186033	0.00395335	0.85156
RIC1	1.18459	4.74818	5.81246	0.000187626	0.00397884	0.870136
FAM71E1	1.2786	4.36171	5.80302	0.000190003	0.00399407	0.897624
MT-ND5	0.682418	10.2395	5.80246	0.000190145	0.00399407	0.448325
ENO3	1.33453	3.77598	5.7858	0.000194421	0.00406368	0.927999
RERE	1.15321	6.25463	5.77353	0.000197638	0.00409726	0.691904
KLF10	1.25364	6.49145	5.77154	0.000198165	0.00409984	0.696769
TTC9	1.33819	4.03825	5.76725	0.000199307	0.00410298	0.93234
ARHGAP29	1.04693	6.12072	5.76477	0.000199969	0.00410298	0.756522
CEBPB	1.12815	7.07946	5.74995	0.00020398	0.00414091	0.658782
TMCC1	1.31134	4.7183	5.74908	0.000204218	0.00414091	0.880476
MAFF	2.035	3.99841	5.7405	0.000206583	0.00418034	1.02175
MT-RNR1	0.747429	12.0002	5.73764	0.000207379	0.00418034	0.267985
HIPK2	0.996065	7.05751	5.67998	0.000224125	0.00442125	0.423835
PEAR1	1.78388	3.30706	5.6603	0.00023017	0.00451408	0.863685
PDCD4	1.09809	5.30539	5.6589	0.000230604	0.00451408	0.661067
CDCP1	0.858782	8.15105	5.65161	0.000232893	0.00454045	0.374171
RAB6B	1.21865	4.4324	5.64649	0.000234515	0.00454045	0.718908
PDGFB	2.73675	3.92615	5.64445	0.000235163	0.00454218	0.944829
IL17RD	1.15018	5.12581	5.64239	0.000235821	0.00454625	0.590238
ZFAND5	0.870561	7.27388	5.63981	0.00023665	0.00455361	0.430508
PKD1	1.09924	4.57406	5.63229	0.000239076	0.00459162	0.625238
RYBP	1.01041	5.8109	5.60788	0.000247141	0.00470215	0.5235
KLF2	1.10876	5.92045	5.58429	0.000255213	0.00482865	0.466461
MOB3A	1.24717	3.9132	5.58211	0.000255973	0.00483404	0.663208
TTC3	0.843246	6.95712	5.57253	0.000259342	0.00486628	0.354118
ATP8B3	1.53132	3.46706	5.57183	0.000259592	0.00486628	0.769346
DST	1.01453	5.5084	5.57021	0.000260167	0.00486808	0.46912
POC1B	1.14493	5.11166	5.56869	0.000260709	0.00486927	0.546316
ANKRA2	1.18182	4.91924	5.56436	0.000262256	0.00488919	0.51699
PDE2A	1.24782	4.27287	5.56141	0.000263312	0.00489992	0.520679
EPB41L4A-AS1	0.978358	7.31705	5.5588	0.000264256	0.00490851	0.30818
EGLN1	1.20476	5.2052	5.55408	0.000265967	0.0049134	0.553618
TNFRSF1A	1.10196	6.59473	5.54888	0.000267866	0.00493058	0.292427
HSPG2	1.29011	5.13895	5.53514	0.000272956	0.00499446	0.42023
ONECUT3	1.05791	5.88165	5.53154	0.000274309	0.00500392	0.39107
SLC5A3	1.89952	4.02667	5.52813	0.000275595	0.00501839	0.656931
RGL3	1.07489	4.80701	5.51892	0.0002791	0.00505851	0.49614
PMAIP1	0.88385	6.16642	5.51594	0.000280245	0.00506681	0.344466
TNIK	0.967983	6.3932	5.50887	0.000282981	0.00510721	0.316347
HDAC7	0.817187	7.20553	5.48999	0.00029043	0.00518879	0.172779
APP	1.28026	8.55619	5.48865	0.000290967	0.00518879	0.100562
FHL1	1.65967	3.44162	5.48636	0.000291884	0.00518879	0.644417
LPIN3	1.02278	4.99847	5.47963	0.000294606	0.00521539	0.310278
SERPINA5	1.30179	4.37773	5.47757	0.000295443	0.00522103	0.505611
ANKRD12	1.37008	5.28907	5.47549	0.000296293	0.00522698	0.471781
EIF4A2	0.843558	8.01831	5.46566	0.000300338	0.00528004	0.145416
HPCAL4	1.16618	4.24131	5.4599	0.00030274	0.00530394	0.386261
SORL1	1.1188	5.16866	5.44951	0.000307119	0.00535303	0.379565
STX1A	1.75942	3.67446	5.43878	0.000311711	0.0054053	0.598984
PPP1R13L	1.31913	4.66688	5.42724	0.000316736	0.00545526	0.389307
LAT2	1.81898	2.76396	5.40551	0.000326431	0.00558444	0.61818
MT1F	1.12177	4.29978	5.40331	0.000327431	0.00559215	0.36726
NGEF	1.21833	4.44512	5.3925	0.000332388	0.00564837	0.349783
ANKRD19P	1.41431	4.29119	5.39131	0.000332943	0.00564837	0.387016
KAT6B	1.41956	4.08375	5.38663	0.000335115	0.00566696	0.405699
PTPRF	1.02593	7.93919	5.38394	0.000336374	0.00567297	-0.0674563
MINDY2	1.29776	4.09776	5.38261	0.000336995	0.00567297	0.44221
JARID2	1.01996	6.68639	5.38104	0.000337737	0.00567297	0.0700338
EHBP1L1	1.46455	4.14437	5.37773	0.000339297	0.00568898	0.410265
INPP4B	1.36433	4.24713	5.37665	0.000339808	0.00568898	0.386135
ZBTB10	1.48926	5.32646	5.37373	0.00034119	0.00570032	0.21327
NF1	1.48388	3.6457	5.37169	0.000342165	0.00570032	0.442834
SOCS3	1.72951	4.08079	5.35057	0.000352398	0.0058043	0.388798
TMEM44	1.32555	3.39186	5.32711	0.000364153	0.00592127	0.374058
NGFR	1.66154	4.18584	5.32323	0.000366136	0.00594402	0.350458
S100A10	0.865707	7.29093	5.31921	0.000368205	0.00595859	-0.0325228
DLG4	1.53149	6.68185	5.31372	0.000371053	0.00598565	-0.0125303
WASF2	1.16215	6.03311	5.30595	0.000375119	0.00603213	-0.020168
KIFC3	0.917836	5.5728	5.29755	0.000379566	0.00608442	0.00158195
TMEM39B	0.832627	5.57392	5.29072	0.00038323	0.00613348	-0.00119067
CCNG2	1.28615	5.72882	5.2768	0.000390804	0.00621561	0.0625972
PJA2	0.990948	5.83447	5.26019	0.000400059	0.00634299	0.00869829
CCDC68	2.28727	3.13059	5.24779	0.000407117	0.00639683	0.335179
SLC6A6	1.48759	5.25989	5.23532	0.000414353	0.00648877	0.0720627
ARFGEF3	2.14393	3.03803	5.23251	0.000416003	0.0065046	0.399868
FGFR1	1.09636	5.96778	5.21914	0.000423945	0.00656151	-0.0946138
MBNL2	1.1756	4.86852	5.21585	0.000425929	0.00657895	0.118891
GRB7	1.15548	5.45032	5.20843	0.000430431	0.00663842	-0.0879122
TNIP1	1.20115	5.6288	5.20338	0.000433523	0.00667599	-0.0912385
GPR107	0.930982	6.86521	5.18814	0.000443001	0.00679113	-0.233487
UBE2H	0.716986	7.49021	5.17633	0.000450494	0.00686013	-0.299289
ZNF770	0.908601	7.33878	5.16812	0.000455787	0.00690396	-0.239894
KBTBD2	1.56178	5.19957	5.16369	0.00045867	0.00692701	-0.100028
NAMPT	1.02214	5.92318	5.15634	0.0004635	0.00697923	-0.134187
ARRDC4	2.27489	3.1919	5.13677	0.000476619	0.00709285	0.275902
DNTTIP1	0.936797	5.96511	5.13189	0.000479953	0.00712085	-0.24595
FLNB	1.16948	6.34758	5.13111	0.000480488	0.00712085	-0.266447
NPNT	1.99157	2.98503	5.12501	0.000484693	0.00713405	0.209069
ATP11A	1.14593	4.82783	5.12461	0.000484965	0.00713405	-0.0167779
DGKD	0.975374	5.15686	5.11891	0.000488936	0.00716098	-0.172345
PAQR6	1.30258	3.22448	5.11189	0.000493874	0.00720221	0.0396387
RNF215	1.91105	2.48677	5.10575	0.000498229	0.00721405	0.186924
RCOR2	1.80643	4.42985	5.09499	0.000505971	0.00729501	-0.0477977
GSDMB	1.46834	2.91629	5.09182	0.000508279	0.00731792	0.116081
KIAA0895L	1.16878	4.84218	5.08197	0.000515511	0.00736138	-0.128789
ITPKA	1.52697	3.76438	5.07791	0.000518529	0.00736138	-0.0332752
NGLY1	0.991482	4.96709	5.07481	0.00052084	0.00737362	-0.160207
EFR3B	1.83567	2.67583	5.04336	0.00054495	0.00762491	0.0453573
OSBPL10	1.24354	4.6051	5.04192	0.000546081	0.00762491	-0.120394
WASHC1	1.22463	3.38662	5.03988	0.000547687	0.00762641	-0.191789
CD59	0.684462	7.91059	5.03708	0.000549907	0.00763643	-0.521002
BAZ2B	0.903241	5.82016	5.0342	0.000552194	0.00765775	-0.335424
MT1P3	1.91133	3.04191	5.01526	0.000567504	0.00776427	0.0177093
PSAP	0.6042	10.3962	5.01392	0.000568602	0.00776886	-0.810525
WDR45B	0.969822	8.27828	5.00869	0.000572917	0.007786	-0.580282
IGF2BP3	1.18617	5.76719	5.00333	0.000577374	0.00782557	-0.32475
DEGS2	2.34373	1.51362	4.99721	0.000582507	0.00786385	0.0947194
MMP24OS	0.7628	6.47372	4.99173	0.000587153	0.00788474	-0.525413
SEC14L1	1.09271	4.7299	4.97418	0.000602283	0.0079865	-0.311078
SAFB2	0.830988	5.43193	4.97384	0.000602577	0.0079865	-0.467207
RUNX1	1.27188	4.23259	4.96963	0.000606273	0.00802116	-0.198413
WDR66	1.72145	2.23719	4.96574	0.000609706	0.00804954	-0.0027901
PAPLN	2.2409	2.19091	4.96325	0.000611918	0.00806828	0.00566891
KLF12	1.52004	3.68894	4.95182	0.000622168	0.00817167	-0.0555597
PHF10	1.24559	5.74081	4.93258	0.000639839	0.00836062	-0.533971
ZKSCAN1	0.794771	6.89146	4.92042	0.000651283	0.00848274	-0.605224
EHD2	1.2218	4.33056	4.91999	0.000651685	0.00848274	-0.34678
GSN	1.32701	6.13252	4.91184	0.000659483	0.00854056	-0.576855
ELL	0.887491	5.25029	4.90941	0.000661826	0.00856	-0.526144
FBXO42	1.13122	4.14307	4.90099	0.000670019	0.00863496	-0.363963
TRIM9	2.58485	2.11401	4.89281	0.000678082	0.0086711	-0.0450404
TIAM1	0.724507	7.08675	4.88947	0.000681401	0.0086976	-0.703033
DEPTOR	1.05651	3.98456	4.88901	0.000681863	0.0086976	-0.369965
SULT4A1	1.22865	4.27557	4.879	0.000691927	0.00876904	-0.442194
PADI2	1.58619	3.51087	4.87408	0.000696929	0.00879064	-0.272785
TMEM144	1.32865	3.58691	4.87073	0.000700364	0.00880124	-0.24858
PATJ	1.49965	3.79944	4.8653	0.000705965	0.00883889	-0.243588
ROBO3	0.989273	5.60019	4.85817	0.00071339	0.00890076	-0.641019
C9orf3	1.46708	3.60809	4.85763	0.00071395	0.00890076	-0.280373
ZC3H6	1.22553	4.14154	4.85448	0.000717259	0.0089145	-0.363871
IRF3	0.942953	4.68453	4.85311	0.000718709	0.00892163	-0.502324
DDX50	1.38696	6.70745	4.84703	0.000725157	0.00897723	-0.6846
FOSL1	1.57398	4.03668	4.84639	0.000725834	0.00897723	-0.360406
POM121	1.17898	2.97648	4.83625	0.000736733	0.00906797	-0.365542
SEMA3B	1.16809	4.56003	4.82365	0.000750529	0.00916039	-0.529108
SPHK1	1.28852	2.70779	4.82094	0.000753523	0.00917477	-0.339987
YEATS2	0.985084	6.00489	4.81805	0.000756738	0.00919193	-0.660137
ITGA3	1.11239	5.88613	4.81617	0.000758843	0.00920651	-0.585497
LAMB3	1.7615	3.99145	4.80771	0.000768364	0.00926412	-0.389038
ST6GALNAC2	1.10937	3.7483	4.80711	0.000769052	0.00926412	-0.447042
SMARCA1	0.941911	6.16451	4.79677	0.000780876	0.00937328	-0.716256
MT-TI	1.67489	4.10273	4.78875	0.000790173	0.00944034	-0.353751
GLI2	1.19994	3.47966	4.78084	0.000799475	0.00949575	-0.444151
NTN1	1.01876	3.96983	4.76486	0.000818608	0.00967783	-0.650256
IRX3	1.09669	3.73984	4.75406	0.000831813	0.00978847	-0.571132
ZBTB25	1.32743	4.08689	4.74281	0.000845806	0.009924	-0.485597
FAM216A	1.2396	5.79742	4.7351	0.000855554	0.00999849	-0.815881
GAA	0.70625	6.66173	4.72869	0.000863736	0.010071	-0.942794
DYNC1I2	0.949393	6.30308	4.71682	0.00087912	0.010192	-0.935857
MYOM1	2.04474	1.7232	4.71006	0.000888007	0.010265	-0.295339
NBEA	1.67328	2.44069	4.70725	0.000891735	0.010265	-0.342788
SGSM2	0.963374	5.85624	4.70623	0.000893097	0.010265	-0.786829
AFF4	0.961853	5.43777	4.70593	0.000893488	0.010265	-0.790147
CLMN	1.22739	4.53331	4.70418	0.000895817	0.0102802	-0.582171
KIAA1211L	2.17168	1.85554	4.70229	0.000898344	0.0102976	-0.306656
KDM5C	1.23022	5.57987	4.69779	0.000904399	0.0103321	-0.79084
YPEL5	0.978207	5.07924	4.68846	0.000917073	0.0104651	-0.76794
LINC00963	1.12612	4.89015	4.68665	0.000919549	0.0104816	-0.767196
PGM2L1	1.10391	4.42515	4.6844	0.000922647	0.0104883	-0.635843
GAD1	1.06238	4.56721	4.6834	0.000924014	0.0104883	-0.802022
NARF	0.745196	6.31754	4.68214	0.000925763	0.0104937	-1.00061
TMTC2	1.51044	4.75947	4.68071	0.000927744	0.0105045	-0.750223
ARTN	1.49512	3.33515	4.66234	0.000953563	0.0106776	-0.477506
GLG1	0.679637	7.95689	4.6619	0.000954185	0.0106776	-1.15539
IGF2BP2	0.721439	7.07135	4.66178	0.000954362	0.0106776	-1.01151
THSD4	1.47203	3.91433	4.66171	0.000954457	0.0106776	-0.612927
PBX3	1.19089	4.3088	4.65912	0.00095817	0.0106863	-0.752679
F3	1.53137	3.8263	4.65832	0.000959311	0.0106863	-0.488919
VSIR	1.41184	2.95867	4.65822	0.000959463	0.0106863	-0.49988
GSE1	0.944413	6.33986	4.65276	0.000967336	0.0107378	-1.00325
RBPJ	0.871224	6.5463	4.64589	0.000977335	0.0108134	-1.00319
TESMIN	1.23706	3.70197	4.64372	0.000980514	0.010825	-0.659958
GCAT	0.738472	5.72846	4.64273	0.000981982	0.0108295	-0.986013
GOLGA2	0.797517	6.33158	4.63356	0.000995574	0.010932	-1.03438
TGFA	0.755009	6.40112	4.62484	0.00100868	0.0109593	-1.01694
TXNRD1	0.997418	6.95077	4.62315	0.00101125	0.0109593	-1.06817
CBX4	1.18128	4.9864	4.62001	0.00101602	0.0109672	-0.85177
HID1	1.3114	4.05546	4.60623	0.00103729	0.011126	-0.839836
ADAM17	0.985166	6.82506	4.60143	0.0010448	0.0111601	-1.10639
GPT2	0.685254	7.27866	4.60139	0.00104486	0.0111601	-1.18729
WWTR1	0.990814	5.68215	4.59984	0.00104731	0.0111668	-0.973105
STK40	1.04772	4.36894	4.58374	0.001073	0.0113417	-0.905175
NKX2-1	2.49339	2.04645	4.57902	0.00108066	0.0113873	-0.473418
CLIP2	1.12865	4.16357	4.57687	0.00108417	0.0114058	-0.767211
CEMIP	0.928515	6.30562	4.57442	0.0010882	0.0114193	-1.07652
TLNRD1	0.65798	7.70405	4.57133	0.00109328	0.0114609	-1.25018
TRIB2	1.01323	5.94751	4.56855	0.00109788	0.0114736	-1.09257
HIVEP3	1.29702	3.64975	4.55753	0.00111629	0.0116272	-0.765586
UPP1	0.983981	4.60072	4.55703	0.00111714	0.0116272	-0.997932
AK4	0.748906	5.94223	4.55387	0.00112249	0.0116615	-1.10407
LRP1	2.44657	2.07335	4.54744	0.00113345	0.0117026	-0.51953
ADGRG6	1.05864	5.00667	4.54601	0.0011359	0.0117028	-0.90252
PARD3	0.746073	5.93631	4.5452	0.0011373	0.0117053	-1.12613
TIMP2	0.575105	8.15689	4.5382	0.0011494	0.0117931	-1.36694
TTLL3	1.66557	2.47893	4.53759	0.00115047	0.0117931	-0.626284
CDH1	0.852626	6.79624	4.53321	0.00115812	0.0118597	-1.19828
SMYD3	0.818639	5.32226	4.52552	0.00117169	0.0119155	-1.06857
ACTR1B	0.862376	5.9037	4.52482	0.00117293	0.0119155	-1.21519
SEL1L3	0.763576	7.40517	4.51867	0.00118393	0.0119879	-1.30784
ABTB1	1.59614	2.67036	4.5182	0.00118478	0.0119879	-0.681166
ARHGEF2	1.05823	4.6557	4.51511	0.00119033	0.0120202	-1.02025
PLOD1	0.764745	7.92525	4.50285	0.00121269	0.0121855	-1.39906
SHOX2	1.04638	4.46138	4.50146	0.00121526	0.0121873	-0.989447
PFKFB3	0.693393	6.52761	4.50054	0.00121695	0.0121923	-1.2702
TTC19	0.590227	7.92568	4.49974	0.00121843	0.0121951	-1.39599
PAQR5	1.08917	5.38112	4.49907	0.00121968	0.0121956	-1.10788
SOX4	0.536444	9.69539	4.49331	0.00123039	0.0122482	-1.49825
DBP	1.51701	3.47806	4.49218	0.00123251	0.0122482	-0.817726
GPR153	1.06371	3.76637	4.49173	0.00123336	0.0122482	-0.894248
CLK3	1.07839	4.81661	4.48587	0.00124439	0.0123141	-1.07318
LMAN1	0.966023	6.68349	4.48564	0.00124484	0.0123141	-1.22734
ERN1	1.54355	4.26994	4.48031	0.00125497	0.0124023	-0.963275
IZUMO4	3.45529	0.89309	4.479	0.00125746	0.0124149	-0.613654
WFDC3	1.70244	2.05228	4.47736	0.00126061	0.0124256	-0.681294
SLC16A6	1.27682	4.30661	4.46263	0.00128923	0.0126183	-1.01018
PLEKHA4	0.868818	5.33059	4.46188	0.00129069	0.0126205	-1.2138
C2orf72	1.26282	3.92143	4.46016	0.00129409	0.0126295	-1.0313
DOCK3	1.53664	2.53277	4.45947	0.00129545	0.0126307	-0.724508
ATP1A1	0.794477	8.69243	4.44723	0.00131987	0.0127952	-1.52726
SCX	1.52808	3.05438	4.43692	0.0013408	0.0129488	-0.803258
KIAA2013	0.701856	7.88328	4.43303	0.0013488	0.0130137	-1.47052
ZBTB4	0.851415	5.17975	4.42904	0.00135706	0.0130686	-1.24292
PTMS	0.793076	5.51176	4.42799	0.00135924	0.0130772	-1.31367
LINC00326	0.94738	4.8675	4.41744	0.00138136	0.013265	-1.09783
CD44	0.623006	8.6498	4.41379	0.0013891	0.0133016	-1.5306
FTLP3	1.8946	2.64323	4.41207	0.00139277	0.0133242	-1.03325
HECA	1.07924	4.70893	4.40133	0.00141586	0.0134945	-1.03625
ZNF674	1.59328	2.85983	4.39605	0.00142739	0.0135788	-0.826649
BFSP1	0.980528	5.03392	4.39434	0.00143114	0.0135892	-1.25756
CAMK2N1	1.16408	4.17526	4.39288	0.00143434	0.0136068	-1.05984
C4orf47	2.35262	1.56784	4.38816	0.00144477	0.0136803	-0.746597
PLK2	0.649356	7.12476	4.37624	0.00147146	0.0138239	-1.51502
RBPMS	1.00166	4.49348	4.37529	0.00147361	0.0138239	-1.17145
MSANTD3	0.991975	5.27471	4.37337	0.00147795	0.0138239	-1.28404
ITGB1	0.845161	4.83147	4.37324	0.00147826	0.0138239	-1.23408
MBP	0.758779	6.93437	4.37294	0.00147894	0.0138239	-1.46992
TRMT10B	1.29035	3.41064	4.36847	0.00148912	0.0138935	-1.0758
CRIP2	0.904957	4.64796	4.36684	0.00149287	0.013903	-1.30255
GPATCH2L	0.897659	5.02179	4.36421	0.00149893	0.0139466	-1.25579
KRT18	0.543221	9.36168	4.36211	0.00150377	0.0139661	-1.68548
RFTN1	1.4749	3.69132	4.35664	0.00151648	0.0140585	-1.02995
ANKRD10	0.889136	6.80393	4.35184	0.00152772	0.0140999	-1.50731
SEC61G	0.777009	9.60303	4.35178	0.00152787	0.0140999	-1.70921
ARG2	1.15065	3.24646	4.34093	0.00155362	0.0142343	-1.09427
SUN1	1.31778	6.84252	4.33703	0.00156299	0.014303	-1.51423
CNTNAP3B	1.2868	3.46122	4.33664	0.00156393	0.014303	-1.00096
WNT6	2.78725	1.23406	4.31882	0.00160754	0.0146239	-0.840954
FN1	2.63464	2.95678	4.31879	0.00160763	0.0146239	-0.836062
AMN1	0.878094	5.31297	4.31001	0.00162959	0.0147314	-1.42227
ZNF395	1.41123	5.6391	4.30473	0.00164293	0.0148257	-1.32136
DCAF16	0.651054	6.24414	4.30374	0.00164544	0.0148347	-1.60145
GJB3	1.02843	4.81426	4.29918	0.00165711	0.0149008	-1.41989
OSGIN1	1.01057	3.44788	4.29725	0.00166206	0.0149321	-1.23673
GAPDHP40	0.841561	6.97949	4.29541	0.00166681	0.0149616	-1.66607
PTAFR	1.47794	2.60669	4.29024	0.0016802	0.0150054	-0.981867
NOL4L	1.21823	3.98647	4.28504	0.00169377	0.0150971	-1.27229
CBX7	1.26087	5.63131	4.27874	0.00171039	0.0151789	-1.55365
LAMA5	0.797954	5.76712	4.27793	0.00171255	0.0151847	-1.51122
CAPS2	1.07443	3.7876	4.26268	0.00175356	0.0154943	-1.29645
TFE3	1.27785	4.34502	4.26007	0.00176067	0.0155437	-1.17408
FAM43A	1.34661	4.17632	4.25583	0.00177228	0.0156326	-1.40246
POFUT2	1.22094	4.49313	4.24081	0.00181415	0.0158702	-1.43474
CHD3	0.881587	5.68629	4.23923	0.00181862	0.0158899	-1.62138
CRYBB2P1	0.897095	4.43601	4.23793	0.00182229	0.015908	-1.46941
ZEB1-AS1	2.77658	0.908827	4.2374	0.00182381	0.015908	-0.966941
IER5L	0.641517	7.4972	4.23279	0.00183692	0.0159812	-1.71759
ATP6V1C2	1.8116	2.39027	4.22161	0.0018692	0.0161566	-1.05376
WTIP	1.46718	3.08804	4.2216	0.00186921	0.0161566	-1.18803
MAPK8IP3	0.942319	4.61352	4.22157	0.00186932	0.0161566	-1.52989
SCAPER	1.2708	3.60229	4.22036	0.00187282	0.0161566	-1.20438
NES	1.2042	3.61961	4.21997	0.00187398	0.0161566	-1.32653
FOXP1	1.09656	4.25307	4.21828	0.00187892	0.0161566	-1.42642
MZF1	1.49931	3.1779	4.21728	0.00188186	0.0161566	-1.19333
SEMA7A	1.25293	3.35089	4.21692	0.0018829	0.0161566	-1.18311
ABI2	0.635263	6.59529	4.21667	0.00188363	0.0161566	-1.72869
LNPK	0.983489	5.38047	4.21591	0.00188588	0.0161586	-1.54921
RET	1.8417	2.17496	4.21424	0.00189077	0.0161694	-1.02637
GRK5	1.5048	3.2371	4.2138	0.00189208	0.0161694	-1.25071
SEC14L2	1.18307	3.88524	4.21274	0.00189521	0.0161694	-1.34743
ZNF217	1.28272	3.82089	4.21225	0.00189667	0.0161694	-1.25035
CLDN7	0.639292	7.43479	4.20923	0.0019056	0.0161825	-1.77389
PTMAP5	1.00217	5.63546	4.20596	0.00191536	0.01622	-1.79085
LAMC2	0.849718	4.59186	4.19765	0.00194037	0.0163773	-1.58036
2019-09-10	0.902482	5.43119	4.18934	0.0019657	0.0165636	-1.58707
LRRFIP1	0.757084	6.38084	4.18843	0.00196852	0.0165737	-1.6758
PDLIM2	1.0211	4.87978	4.17977	0.00199534	0.0167192	-1.53094
CSPG5	1.2263	3.99423	4.17803	0.00200078	0.0167345	-1.31019
MICAL1	0.940781	3.59142	4.17689	0.00200433	0.0167505	-1.46302
TNFRSF21	0.63051	7.81035	4.17506	0.0020101	0.0167849	-1.8929
IDH2	0.682594	6.74491	4.17157	0.00202109	0.0168491	-1.80389
PCNX1	0.824611	4.97738	4.17019	0.00202547	0.0168717	-1.59681
KIF5C	1.19181	3.60612	4.16049	0.00205647	0.0170732	-1.37521
PTPN12	0.679938	6.12379	4.15265	0.00208188	0.0172288	-1.74563
BAIAP2L1	0.740031	7.08158	4.14755	0.00209859	0.0173021	-1.88003
TMC8	1.27479	3.04891	4.14422	0.00210958	0.0173592	-1.29012
OLFM1	1.77953	2.32168	4.14247	0.00211536	0.0173726	-1.15075
INSR	0.743401	5.59472	4.14024	0.00212278	0.0173832	-1.78144
ENO1	0.583487	11.2174	4.14012	0.00212317	0.0173832	-2.15621
HSD17B1	1.50234	2.81012	4.1371	0.00213327	0.0174044	-1.28027
AP1S3	0.823539	5.55295	4.1318	0.00215111	0.017461	-1.65961
LMO2	1.70181	2.50583	4.12988	0.0021576	0.0174998	-1.18349
PNISR	0.781075	7.57453	4.12911	0.0021602	0.0175069	-1.90758
VMP1	0.604165	7.41068	4.12697	0.00216747	0.0175519	-1.88701
PTPRU	0.768113	6.29299	4.11915	0.00219429	0.0177269	-1.90702
SIPA1L2	0.852627	4.42396	4.11914	0.00219431	0.0177269	-1.64486
LYPD3	0.878292	4.07223	4.11767	0.00219938	0.0177538	-1.58222
ING1	0.988783	5.58672	4.10993	0.00222632	0.0178738	-1.76083
RELB	1.1833	4.41983	4.10986	0.00222656	0.0178738	-1.67323
IL27RA	0.989139	5.78456	4.10408	0.0022469	0.0179404	-1.82854
SYTL3	0.830146	4.81788	4.10378	0.00224796	0.0179404	-1.71548
CRELD1	1.08743	3.62886	4.10309	0.0022504	0.0179404	-1.5486
ZFAND1	0.983712	5.64615	4.0943	0.00228177	0.0181021	-1.77488
FYN	1.34705	2.8026	4.09334	0.00228522	0.0181021	-1.31976
INPP1	0.762379	5.04793	4.09023	0.00229644	0.0181205	-1.75983
SLC25A36	0.672809	6.27126	4.08871	0.00230198	0.0181501	-1.84465
CLASP1	1.08809	5.0449	4.08369	0.00232023	0.0182517	-1.84908
GALE	0.689625	5.61953	4.07868	0.00233864	0.0183398	-1.84497
PCK2	0.822749	4.79445	4.07797	0.00234128	0.0183463	-1.78936
LAMC1	0.726133	5.3383	4.07455	0.00235395	0.0184031	-1.80864
PXN	0.592882	8.5549	4.06909	0.0023743	0.0185069	-2.09696
RALB	0.609405	6.35845	4.0676	0.0023799	0.0185348	-1.96741
TMEM59	0.906704	6.66829	4.06313	0.00239676	0.0186297	-1.93087
ZNF511	0.788269	5.36686	4.06245	0.00239935	0.0186297	-1.89273
COL1A1	1.1141	3.66387	4.05994	0.00240887	0.0186463	-1.49417
BRSK2	1.21154	3.17272	4.05905	0.00241225	0.0186486	-1.44028
RNMT	0.686778	6.61871	4.05631	0.00242271	0.0186824	-1.99522
ERCC5	1.10327	4.48339	4.05055	0.0024449	0.0187965	-1.75579
PLEK2	0.769917	5.1224	4.04969	0.00244822	0.0188079	-1.81178
ITGA7	1.1558	3.71176	4.04107	0.00248181	0.0190229	-1.5836
SNORA79B	1.80112	1.69623	4.03259	0.00251534	0.0192075	-1.30559
C14orf132	1.38702	2.72568	4.03068	0.00252298	0.0192514	-1.39691
ZNF143	1.04909	4.09463	4.02417	0.00254914	0.0194219	-1.61447
ANKRD11	0.600613	7.60621	4.02312	0.00255337	0.0194336	-2.11244
CDKN2D	1.1579	5.3991	4.02284	0.00255449	0.0194336	-1.98075
SENP7	1.10147	4.52804	4.0213	0.00256074	0.0194666	-1.8286
LPIN1	1.24493	3.34255	4.01997	0.00256615	0.0194918	-1.53748
KRT19	0.505671	10.6483	3.9977	0.00265845	0.0200151	-2.37113
TMEM74B	1.1933	4.14682	3.98966	0.0026926	0.0201826	-1.70361
SBF2-AS1	1.34199	2.96261	3.9845	0.00271476	0.020289	-1.54328
PGGHG	1.14802	3.70768	3.98398	0.00271702	0.0202909	-1.82655
IL4R	0.743159	5.09981	3.98159	0.00272738	0.0203223	-1.91481
KMT5C	0.812788	5.53862	3.97053	0.00277578	0.0206173	-2.06693
UXS1	0.569896	7.09935	3.97027	0.00277693	0.0206173	-2.17994
PABPC1L	1.2156	4.47524	3.96568	0.00279729	0.0207382	-1.83243
WDR54	0.830769	6.77384	3.96435	0.00280324	0.0207538	-2.14795
RPL34P31	0.992911	2.14358	3.95421	0.00284888	0.0210136	-1.99631
HBEGF	1.16961	3.89775	3.95151	0.00286115	0.0210888	-1.73748
MAFK	0.821105	5.16008	3.94503	0.00289088	0.0212464	-2.00388
MSL1	0.625636	6.50381	3.94234	0.00290331	0.0212882	-2.16062
HERPUD1	0.932205	5.77833	3.94031	0.00291273	0.0212882	-2.01575
SH3GLB1	0.637262	6.17592	3.94006	0.00291385	0.0212882	-2.15197
ADAM9	1.56338	2.5811	3.93995	0.00291439	0.0212882	-1.50836
CTDSP2	0.66548	5.86126	3.93929	0.00291748	0.0212882	-2.1006
MEF2D	1.04273	5.4464	3.93459	0.00293942	0.0213769	-2.05585
GIPR	1.64716	2.4115	3.93313	0.00294627	0.021391	-1.59122
CXCL8	2.28334	1.55479	3.92149	0.00300157	0.0216995	-1.40224
MAFA-AS1	1.26534	2.79016	3.91515	0.00303214	0.0218244	-1.77549
NEIL1	0.857524	5.05055	3.91235	0.00304572	0.0218572	-2.09456
SLC35E1	0.709265	5.58233	3.91052	0.00305465	0.0218967	-2.10038
WAC	0.57432	7.23496	3.90887	0.00306273	0.0219392	-2.26665
IFRD1	1.01944	4.70071	3.90792	0.00306741	0.0219554	-1.87123
TET1	1.94901	1.93545	3.90117	0.00310068	0.0221331	-1.46937
ADAM19	0.574455	7.51611	3.89569	0.00312802	0.0222502	-2.31712
TES	0.611441	6.68247	3.89419	0.00313555	0.0222572	-2.22582
ANO6	1.13411	4.30301	3.88909	0.00316127	0.0223618	-1.81708
TMEM189	0.825106	5.20008	3.88811	0.00316621	0.0223812	-2.10574
STK17A	0.815623	4.75343	3.88473	0.00318341	0.0224715	-1.9977
PHF21A	1.08467	4.87775	3.8837	0.00318866	0.022493	-2.05203
RPS18P9	1.4196	1.71978	3.8824	0.00319532	0.0225088	-1.82628
FANK1	1.00595	3.9003	3.88021	0.00320655	0.0225723	-1.87753
C8orf58	1.29164	3.51004	3.87793	0.0032183	0.0226237	-1.75557
ZSWIM4	1.58056	2.1755	3.87749	0.00322059	0.0226242	-1.55035
RSBN1	0.7255	5.3126	3.8713	0.00325269	0.0227242	-2.1846
SH2D3A	1.20453	4.21151	3.87002	0.00325939	0.0227554	-1.92342
KCNK6	1.08527	3.08983	3.86673	0.00327665	0.0228289	-1.87113
LEMD1	1.47263	2.93251	3.86418	0.00329007	0.0228598	-1.70732
WDFY1	0.780429	5.43866	3.8612	0.00330584	0.0229381	-2.16219
CEBPG	0.886034	5.49501	3.85829	0.00332136	0.0230104	-2.03472
TMEM263	0.727174	5.51024	3.85611	0.00333296	0.023032	-2.13805
MAFG	0.695187	6.45176	3.85418	0.00334332	0.023088	-2.30055
YY1AP1	0.993773	6.02439	3.85295	0.00334994	0.023118	-2.31521
MAP1LC3B	0.604897	6.47015	3.84439	0.00339636	0.0233749	-2.28411
RAB3A	1.40482	3.40117	3.84237	0.00340742	0.0234352	-1.86782
RNF165	1.16698	3.11164	3.8356	0.00344467	0.023605	-1.76363
TMC6	0.744615	6.52467	3.82776	0.0034884	0.0237515	-2.38715
FBXO46	0.742352	6.11438	3.82701	0.00349262	0.0237552	-2.26351
GAS5	0.592138	8.363	3.82678	0.00349393	0.0237552	-2.46826
CST6	0.616897	7.43565	3.8257	0.0035	0.0237569	-2.44179
CSRP2	1.07679	4.60688	3.82555	0.00350087	0.0237569	-1.95165
CDC42EP1	0.760341	4.66575	3.82388	0.00351029	0.0237891	-2.12308
GPR161	0.984081	3.8996	3.82241	0.00351858	0.0238136	-1.9401
NPAS2	1.31998	3.83178	3.82112	0.00352594	0.0238317	-1.81336
UGGT2	0.835401	4.40268	3.81116	0.00358297	0.0240416	-2.06373
ELMSAN1	0.889312	4.23416	3.8103	0.00358789	0.0240587	-2.00369
COL27A1	1.03428	3.90176	3.79896	0.00365414	0.0244122	-1.97938
SERPINB9	0.803441	5.51291	3.79583	0.00367262	0.0244978	-2.2709
ELL2	1.14842	3.70895	3.79451	0.00368046	0.024534	-1.87169
DARS	0.589344	6.97723	3.78755	0.00372203	0.0247604	-2.40893
MOB3C	1.03316	3.50477	3.78311	0.00374879	0.0248431	-2.02463
EEF2	0.393556	11.1759	3.78136	0.00375941	0.0248689	-2.77316
TPT1-AS1	1.26394	2.99446	3.77487	0.00379905	0.0251108	-1.91536
ATG12	0.639284	6.25397	3.77269	0.00381246	0.0251667	-2.37109
NAP1L1	0.762085	9.02867	3.7683	0.00383963	0.0252948	-2.61338
TICAM1	0.819956	5.70656	3.76533	0.00385809	0.0253442	-2.3395
SMURF2	0.832851	6.59976	3.76514	0.00385927	0.0253442	-2.40183
ELP2	0.651782	6.28337	3.75878	0.0038992	0.0255537	-2.40878
RHBDF2	0.628536	6.08411	3.75362	0.00393187	0.0256884	-2.49171
PAG1	1.55904	2.11647	3.75309	0.00393528	0.0256942	-1.78546
CDK5RAP3	0.611226	6.38342	3.75262	0.00393828	0.0256972	-2.48029
REC8	1.2279	2.29386	3.74546	0.0039842	0.0259384	-1.85827
CCDC50	0.840395	5.9038	3.74162	0.00400905	0.0260256	-2.34898
B4GALT6	1.02725	3.61908	3.73941	0.00402339	0.0260786	-2.00162
NAT16	1.75238	2.42212	3.73826	0.00403092	0.0260844	-1.96118
GAB2	1.1382	3.20411	3.73631	0.00404367	0.0261337	-2.08096
FAM8A1	1.07727	4.03775	3.73567	0.00404787	0.0261442	-2.10303
IMMP2L	1.28965	3.76906	3.73525	0.00405062	0.0261454	-2.01905
TMEM8B	0.871648	3.87281	3.73166	0.0040743	0.0262439	-2.19436
ANTXR2	2.09129	2.36556	3.73137	0.0040762	0.0262439	-1.78346
CRYL1	0.834625	5.15907	3.72313	0.00413103	0.0265131	-2.3337
ERCC1	0.693026	5.18219	3.72113	0.00414444	0.0265322	-2.40388
MAP3K12	1.01579	3.83419	3.71604	0.00417886	0.0267059	-2.15874
ARID3A	0.853927	4.49305	3.71568	0.00418125	0.0267059	-2.21821
ENDOD1	0.618326	6.11805	3.71556	0.00418206	0.0267059	-2.46941
TFCP2L1	0.672607	4.99607	3.71256	0.00420249	0.0267692	-2.41612
SERPING1	1.76155	2.47806	3.7109	0.00421384	0.0268094	-1.88461
UTRN	1.59714	2.82757	3.71087	0.00421408	0.0268094	-1.80875
PFKP	0.766345	7.62321	3.7015	0.00427869	0.027095	-2.61587
C2orf70	1.28491	2.24462	3.70127	0.00428026	0.027095	-1.92482
CACNB3	0.719531	5.47419	3.6997	0.0042912	0.0271474	-2.50431
YIPF3	0.709058	5.6671	3.69931	0.00429391	0.0271476	-2.4731
NR2F1-AS1	0.775504	4.62633	3.69519	0.00432276	0.0272792	-2.28659
ZNF496	0.910526	3.8385	3.6937	0.00433322	0.0273283	-2.23657
FNBP1	0.815656	4.90119	3.6922	0.00434381	0.0273781	-2.35318
ASAP1	0.772118	5.44235	3.68791	0.00437421	0.0274982	-2.40225
SRGAP3	1.30896	2.8959	3.68715	0.00437963	0.0275017	-2.00447
OVOL1	0.914834	4.67193	3.68496	0.00439528	0.0275729	-2.34405
CFAP97	0.648017	5.98434	3.68234	0.00441408	0.0276001	-2.49704
PHF3	0.664491	5.6641	3.68201	0.00441645	0.0276001	-2.42932
IL1RAP	2.58134	1.09517	3.68193	0.00441699	0.0276001	-1.73922
C1R	1.43826	2.9325	3.68082	0.00442499	0.027626	-2.0557
KLF7	1.14643	4.1425	3.68029	0.00442877	0.027626	-2.13419
EMID1	0.967094	3.63238	3.68022	0.00442928	0.027626	-2.22896
GJA3	1.57557	3.31191	3.67918	0.00443681	0.0276515	-1.99652
GJB2	0.738748	4.93548	3.67877	0.00443977	0.0276515	-2.39755
MPRIP	0.578279	6.86341	3.67713	0.00445164	0.0276976	-2.62635
SYT12	1.80531	2.30712	3.67389	0.00447517	0.0277953	-1.86276
MFHAS1	0.549023	6.78099	3.67384	0.00447554	0.0277953	-2.62133
DNAJB9	0.864355	4.36007	3.67293	0.00448214	0.0278121	-2.23789
BTNL9	0.776052	3.65941	3.67192	0.00448952	0.0278121	-2.32043
CREB5	2.34305	1.68995	3.6711	0.00449556	0.0278121	-1.80585
FAM227B	1.08408	3.8981	3.67067	0.00449869	0.0278121	-2.31991
NR1D2	0.984222	5.32482	3.67067	0.00449873	0.0278121	-2.4802
FEZ1	1.22591	2.36937	3.66999	0.00450365	0.0278167	-2.02769
FEZF1-AS1	1.50971	2.1833	3.66871	0.0045131	0.0278249	-1.92816
EIF3J-DT	1.21503	3.07838	3.66719	0.0045243	0.027877	-2.14944
RNF213	0.78683	4.92022	3.66383	0.0045491	0.0279641	-2.48402
ELOA-AS1	1.22469	2.5652	3.66379	0.00454943	0.0279641	-2.04778
S100A6	0.377958	11.8686	3.66328	0.00455318	0.0279703	-3.02811
SCARNA22	1.80005	4.75019	3.66125	0.00456828	0.0280461	-2.3921
SUN2	0.596766	6.41281	3.66069	0.00457245	0.0280548	-2.65786
RSF1	0.706111	6.06094	3.65949	0.00458138	0.0280927	-2.53891
PLEKHG1	1.93953	3.54695	3.65876	0.00458683	0.0281092	-2.21287
BRWD3	0.985847	3.87598	3.65801	0.00459247	0.0281099	-2.25653
GPC2	0.920233	4.43578	3.65644	0.0046042	0.0281553	-2.44751
CTBS	1.04103	3.74881	3.65511	0.00461422	0.0281922	-2.13585
DRAXIN	1.02392	3.46974	3.65367	0.00462503	0.0282413	-2.26248
GABARAPL1	0.592235	6.41018	3.6513	0.00464294	0.0283166	-2.62601
CEP70	0.694556	4.95616	3.65032	0.00465035	0.0283173	-2.46542
CORO2A	1.32847	3.63723	3.64999	0.00465288	0.0283173	-2.11075
ITPRIP	0.907224	4.70815	3.64982	0.00465417	0.0283173	-2.43061
TOX2	0.691113	8.541	3.64826	0.00466599	0.0283553	-2.79224
GDPGP1	1.26141	2.87962	3.64773	0.00467003	0.0283629	-2.02615
TIPARP	1.03914	4.79102	3.64434	0.00469596	0.0285034	-2.26403
ITGA6	1.47741	6.54584	3.63939	0.00473402	0.0286121	-2.65269
EPAS1	0.857549	4.43457	3.63909	0.00473636	0.0286121	-2.3324
ZNF558	1.0653	4.33844	3.63592	0.00476093	0.0287095	-2.23188
GLRX	1.47276	4.86021	3.63484	0.0047693	0.0287331	-2.22231
CTSB	0.527226	7.72474	3.63469	0.00477051	0.0287331	-2.78278
KDM6B	1.30322	3.51733	3.63139	0.00479628	0.0287862	-2.12401
SETDB1	0.641654	5.62375	3.62709	0.00483005	0.0289547	-2.65958
COL7A1	1.13012	2.91127	3.62427	0.00485239	0.0290429	-2.22896
AP1G2	0.965102	3.91534	3.62379	0.00485618	0.0290429	-2.28303
SNX9	1.15928	4.54843	3.62131	0.00487587	0.0291265	-2.33944
ADSSL1	1.34742	2.15423	3.61854	0.00489803	0.0291641	-1.98915
PDZD7	1.21583	2.75478	3.61429	0.00493214	0.0293075	-2.13884
DENND5A	0.904197	4.47782	3.61421	0.00493277	0.0293075	-2.30424
TBC1D16	0.611898	5.39274	3.61351	0.00493844	0.0293075	-2.60975
TMEM42	0.698021	5.08045	3.61277	0.0049444	0.0293075	-2.54792
STK39	0.610729	6.77971	3.61271	0.0049449	0.0293075	-2.70158
HELZ	0.773596	5.48773	3.60606	0.00499898	0.0295616	-2.55172
CASZ1	0.98748	3.41659	3.60485	0.00500892	0.0295913	-2.29088
LRRC75B	1.15573	2.54086	3.59891	0.00505779	0.0297827	-2.13558
RNF24	1.51121	3.39086	3.59878	0.00505887	0.0297827	-2.17956
ZNF503	0.732677	6.51392	3.59704	0.00507326	0.0298156	-2.672
TMEM39A	0.676504	5.12221	3.59156	0.00511899	0.0299806	-2.57216
ARHGEF3	0.612901	6.3962	3.5884	0.0051456	0.0301018	-2.7095
SH3TC1	1.31761	2.27714	3.58539	0.00517101	0.0301873	-2.14913
EEPD1	1.06596	3.51506	3.58526	0.00517208	0.0301873	-2.32405
PRKCI	0.99891	4.3569	3.58177	0.00520176	0.030291	-2.49098
EIF1	0.497981	8.97303	3.58002	0.00521666	0.0303313	-2.9247
NFATC4	1.77832	2.31086	3.57991	0.00521761	0.0303313	-2.03424
ESPN	0.874568	4.84206	3.57831	0.00523133	0.030359	-2.49877
ABCA3	1.47594	2.0845	3.57625	0.00524901	0.0304269	-2.15291
BAIAP3	1.11748	3.3447	3.57185	0.00528705	0.0305951	-2.29245
RRAS	0.779937	5.7786	3.57082	0.00529598	0.030612	-2.74693
FCHSD1	1.05198	5.01267	3.56867	0.00531465	0.0306851	-2.61161
PRSS22	1.15005	4.60227	3.56681	0.00533087	0.0307613	-2.398
TUBB2A	0.809763	5.91252	3.56604	0.00533761	0.0307827	-2.75971
NUDT14	0.79624	4.11775	3.55832	0.00540565	0.0310579	-2.53314
TEX19	1.75074	2.33153	3.55827	0.0054061	0.0310579	-2.10007
AADAC	1.75855	1.6537	3.55735	0.00541424	0.031076	-1.95011
OPN3	1.01665	3.843	3.54856	0.005493	0.0314827	-2.2949
NSUN5P2	1.21152	3.26072	3.5439	0.00553515	0.0316886	-2.30009
SPNS2	1.73501	2.38762	3.54176	0.00555462	0.0317814	-2.15995
TMEM65	0.814143	5.14939	3.53542	0.00561278	0.0320609	-2.60861
TRIB1	0.495954	9.39759	3.53225	0.00564214	0.0321744	-3.09912
FAM84B	0.862213	4.25123	3.52801	0.00568155	0.0323584	-2.47254
FAM89B	0.75265	6.26898	3.52776	0.00568394	0.0323584	-2.84288
MAOB	0.676173	6.38294	3.52588	0.00570151	0.032404	-2.83405
CDK19	0.693822	5.13458	3.52363	0.00572262	0.0325059	-2.65027
ING2	0.986518	3.77969	3.52307	0.00572795	0.032518	-2.44552
MFSD10	0.647634	6.88149	3.52126	0.00574498	0.0325602	-2.9331
RSPH3	0.950201	5.34042	3.5208	0.00574936	0.0325643	-2.67497
ZNF469	1.15047	3.66704	3.51171	0.00583599	0.0329842	-2.36286
PRKAA2	1.50612	2.51203	3.50901	0.00586199	0.0330713	-2.16528
ADPRM	1.38107	2.6205	3.49913	0.00595815	0.0335072	-2.24436
NEBL	0.804505	4.44203	3.49825	0.00596678	0.033537	-2.5551
VASP	0.535172	6.27558	3.49792	0.00597004	0.033537	-2.90419
PIP5KL1	0.93547	3.97454	3.49144	0.00603407	0.0337848	-2.57513
VAPB	0.821241	6.24543	3.49044	0.00604401	0.0338219	-2.90753
SLC17A9	0.73508	4.72699	3.4887	0.00606136	0.0338631	-2.66712
PANX2	0.893465	3.8542	3.48728	0.00607558	0.0338927	-2.63566
FAM102A	0.608566	5.6968	3.48489	0.00609963	0.0339651	-2.81517
ZNF354A	0.908979	4.82461	3.48421	0.00610645	0.0339845	-2.80377
SOX13	0.754449	4.37994	3.48093	0.00613951	0.0341311	-2.62705
APLP1	0.767109	4.9419	3.47651	0.00618451	0.0343064	-2.76722
PAQR7	0.956963	4.35998	3.47338	0.0062165	0.0344275	-2.62809
PHC3	0.761847	5.22127	3.47263	0.0062242	0.0344514	-2.76152
CDC42BPG	1.10237	2.73097	3.46792	0.00627273	0.0346259	-2.35628
SLC29A4	1.14307	3.68139	3.45931	0.00636255	0.0350078	-2.44216
PDGFC	1.30664	3.63061	3.45791	0.00637731	0.0350487	-2.31402
C16orf58	0.835405	4.58198	3.44822	0.00648019	0.0354265	-2.68223
RELA	0.585346	7.23237	3.44768	0.00648595	0.0354377	-3.07338
ALDH2	0.846434	5.41943	3.44609	0.00650307	0.0354932	-2.88362
NFATC2	1.18266	3.17919	3.44468	0.00651817	0.0355375	-2.45766
KCNMB4	0.948314	4.41287	3.44304	0.00653588	0.035615	-2.67539
MTHFD1L	0.559647	6.57621	3.44231	0.00654376	0.0356388	-3.01958
ZMYM2	0.883966	4.81398	3.4349	0.00662449	0.0360206	-2.74793
RAB20	0.913478	4.34452	3.43456	0.00662818	0.0360215	-2.68799
RPS2P5	0.930155	3.12588	3.43365	0.00663812	0.036037	-2.65758
STAT6	0.555916	5.7831	3.42919	0.00668726	0.0361575	-2.96374
DHRS3	0.759083	5.06644	3.42842	0.00669584	0.0361575	-2.83364
RPL35P2	1.28661	0.347332	3.42751	0.00670589	0.0361926	-2.51744
MYO6	0.686174	6.92908	3.42576	0.00672538	0.0362593	-3.0235
RLF	0.683482	6.61469	3.42489	0.00673505	0.036273	-3.00614
SNAI1	1.25714	3.58115	3.41842	0.00680761	0.0365196	-2.60667
SPRY2	1.94376	1.92121	3.41807	0.00681149	0.0365196	-2.13341
TSPAN14	0.880647	6.41659	3.41707	0.00682276	0.036552	-3.00893
LRP10	0.581268	5.40306	3.41608	0.00683396	0.0365928	-2.9211
ZNF865	0.801521	4.20638	3.41274	0.00687186	0.0367184	-2.7907
SPRYD7	0.618419	5.37878	3.40984	0.00690491	0.0368319	-2.89298
SH2B3	1.26339	2.81368	3.40576	0.00695178	0.036976	-2.4045
RUNDC3B	0.849467	3.72849	3.40568	0.00695275	0.036976	-2.62333
EPS15	0.846606	4.63447	3.40264	0.00698778	0.0371429	-2.7232
ANO9	0.936638	4.26681	3.40059	0.00701153	0.0372302	-2.79899
WWC2	1.16624	3.47107	3.39869	0.00703368	0.0373089	-2.48438
PCOLCE2	1.72436	2.7583	3.39574	0.00706812	0.03746	-2.36539
KLHL24	0.828389	4.58945	3.39078	0.00712651	0.0376325	-2.82843
PPP2R5B	1.44333	3.39311	3.38965	0.00713993	0.0376325	-2.56693
RETREG3	0.686877	5.36148	3.38536	0.00719084	0.0378271	-3.01349
ZFYVE1	0.604223	4.52751	3.38364	0.00721142	0.0378962	-2.97483
TAX1BP1	0.615484	6.45579	3.37927	0.00726383	0.0380916	-3.05967
USP11	0.614823	6.27206	3.37758	0.00728425	0.0381608	-3.11728
FER1L4	0.946284	2.99453	3.37415	0.00732587	0.0383591	-2.65528
SLC7A1	0.582391	5.8909	3.37234	0.00734794	0.0384548	-3.04508
CHRNB1	1.29351	3.62148	3.37132	0.00736034	0.0385	-2.52226
PICALM	0.569103	7.17522	3.36918	0.00738651	0.0385972	-3.21768
AP2B1	0.612608	6.60848	3.36683	0.00741535	0.0386785	-3.10763
ACBD3	0.492327	6.64158	3.36619	0.00742322	0.0386785	-3.15518
LRP5	1.06102	3.52797	3.36365	0.00745461	0.0387343	-2.61813
HBP1	1.25787	4.56968	3.36129	0.00748387	0.0388467	-2.87866
CREBRF	1.66389	2.42451	3.35495	0.0075631	0.0392379	-2.30455
USP34	0.573743	5.58841	3.35249	0.00759414	0.0393682	-3.04905
ELFN2	0.622133	6.09485	3.34128	0.00773697	0.0399973	-3.20607
RGS9	1.8606	1.45222	3.34021	0.0077507	0.0400479	-2.38331
HIP1	0.714257	4.95965	3.33987	0.00775511	0.0400504	-2.985
PRKCSH	0.822459	5.14863	3.33854	0.00777224	0.0401185	-2.90754
TAF1D	0.689665	7.51387	3.33797	0.00777964	0.0401363	-3.22199
WNT16	1.28929	3.81403	3.33719	0.0077897	0.0401618	-2.51941
CA12	1.02009	3.26754	3.33657	0.00779776	0.0401687	-2.63119
ZSCAN16-AS1	1.01285	3.03618	3.33531	0.00781409	0.0402121	-2.71985
ZFAND3	1.17606	6.49363	3.33415	0.0078293	0.04027	-3.1689
EPS8L1	0.639494	5.02736	3.33361	0.00783628	0.0402707	-3.08789
RAC2	0.58098	6.21298	3.33353	0.00783734	0.0402707	-3.15921
MACF1	0.477985	7.01656	3.33304	0.00784364	0.0402827	-3.23496
FEM1C	1.2843	3.93452	3.32991	0.00788467	0.0404086	-2.68028
PAN2	0.99221	3.27551	3.32855	0.00790247	0.0404624	-2.5947
EEF1AKMT3	1.31382	2.52058	3.32706	0.00792206	0.0405423	-2.48367
ZNF419	1.15394	2.54109	3.32612	0.00793459	0.040586	-2.49217
ZFAS1	0.766072	9.50352	3.32262	0.00798091	0.040782	-3.42738
BTBD2	0.693753	5.31396	3.32081	0.00800497	0.0408639	-2.97099
AFAP1L1	1.7904	2.0828	3.32009	0.00801452	0.0408921	-2.4117
CNOT6L	0.816573	4.30292	3.31741	0.00805041	0.0409222	-2.82528
ARHGEF17	0.657282	4.9534	3.31736	0.008051	0.0409222	-3.00128
CD40	0.889242	6.00823	3.31722	0.00805297	0.0409222	-3.18351
CLDND1	0.727346	6.80967	3.31405	0.00809561	0.0409976	-3.15361
PARD6B	1.21988	3.55193	3.31313	0.00810801	0.0410151	-2.60363
CD164L2	0.987401	3.44416	3.31058	0.00814241	0.0411153	-2.83273
RGS10	0.527521	6.90353	3.30906	0.00816307	0.0411958	-3.2472
ARHGEF9	1.01348	3.98971	3.30555	0.00821096	0.0413146	-2.99705
TRPT1	1.2675	4.1733	3.30483	0.00822087	0.0413385	-2.72827
CCDC18-AS1	1.80384	2.22852	3.29983	0.00828952	0.0415743	-2.45489
STK32C	0.700539	5.68291	3.29971	0.00829118	0.0415743	-3.1444
DYNC1H1	0.431973	8.85925	3.29906	0.00830021	0.0415991	-3.42115
HIST1H2BD	1.56608	2.75245	3.29802	0.00831469	0.0416487	-2.5726
ZNF264	0.680657	4.66596	3.29776	0.00831828	0.0416487	-2.9794
CCNJL	0.807955	4.17666	3.29443	0.00836458	0.0418188	-3.00772
NDRG4	0.639512	5.33779	3.2881	0.00845325	0.0420761	-3.07652
FXYD6	1.53846	2.25885	3.28539	0.00849156	0.0422045	-2.48512
VGLL4	0.713394	5.73324	3.2851	0.00849563	0.0422045	-3.2002
PXDC1	1.51612	2.77357	3.2843	0.008507	0.0422404	-2.61155
ATP9A	0.610307	5.80825	3.28012	0.00856644	0.0424527	-3.23118
AIP	0.573347	5.21478	3.27911	0.00858102	0.0425042	-3.17208
TRAM2	1.04	5.14503	3.27514	0.00863794	0.0427238	-3.20405
PLEKHO1	0.644688	4.93031	3.27355	0.00866091	0.0428166	-3.09323
SLC23A2	1.34751	4.88781	3.26594	0.00877159	0.0431333	-3.07364
CDK10	0.505201	6.12461	3.26095	0.00884497	0.0434202	-3.29303
AKAP13	0.800631	4.81556	3.26053	0.00885125	0.0434202	-3.02683
NLRP1	1.74987	1.96119	3.25972	0.00886325	0.0434578	-2.46012
ZFP14	1.33387	3.6073	3.25938	0.00886828	0.0434578	-2.82507
SYDE1	0.870536	2.61006	3.25354	0.00895515	0.0436793	-2.81074
RREB1	0.919595	4.26935	3.25351	0.00895557	0.0436793	-2.88687
TNFSF12	0.92327	3.97994	3.2512	0.00899019	0.0437702	-2.99151
STX16	0.980572	6.15793	3.25112	0.0089914	0.0437702	-3.31958
RPL3	0.728606	9.744	3.24769	0.00904311	0.0439323	-3.60947
CIC	0.752491	4.92487	3.24675	0.00905731	0.0439323	-3.14472
NOTUM	1.63689	2.89493	3.24662	0.00905923	0.0439323	-2.53863
H6PD	1.1622	3.34025	3.24621	0.0090655	0.0439418	-2.71604
CD33	1.5668	2.08588	3.24509	0.00908239	0.0440027	-2.59708
LINC02609	1.55043	3.19628	3.24356	0.00910563	0.0440782	-2.69507
FRK	1.00599	4.44417	3.2421	0.00912787	0.04416	-3.08436
RPS18P12	1.95325	3.21961	3.24023	0.00915656	0.0442357	-2.96752
TOP2B	0.563511	7.16085	3.23897	0.00917585	0.0442917	-3.37471
PRRG1	0.743988	4.71962	3.23332	0.0092629	0.0445653	-3.07342
ARSK	1.00298	3.49779	3.23324	0.00926419	0.0445653	-2.79222
UBXN7	0.782616	6.27179	3.23222	0.00927989	0.0446197	-3.3598
ZNF16	0.578576	5.02241	3.23039	0.00930844	0.0446534	-3.20782
MYRF	0.829156	4.45696	3.23036	0.00930881	0.0446534	-2.97611
GALNT18	1.10184	5.91425	3.23	0.0093144	0.0446591	-3.188
TSPAN31	0.97241	3.51127	3.22619	0.00937397	0.0448602	-2.80368
SEC63	0.762995	5.71521	3.22468	0.00939772	0.0449316	-3.26885
FLNA	0.496165	7.63914	3.2231	0.0094226	0.0450083	-3.50905
YPEL2	0.912691	3.22996	3.2191	0.00948575	0.0452414	-2.87749
RNF214	0.701289	4.24298	3.21889	0.00948919	0.0452414	-3.04018
OPTN	0.595006	4.86303	3.21687	0.00952124	0.0453362	-3.25866
ITGB4	0.867818	7.98158	3.2168	0.00952243	0.0453362	-3.52044
LINC00511	0.853928	5.00786	3.21574	0.00953931	0.0453741	-3.16595
CADM4	0.752016	4.48556	3.2151	0.00954944	0.0453891	-3.04231
PPP1R26-AS1	1.01215	3.12141	3.21347	0.00957556	0.0454616	-2.87259
UBALD2	0.546406	6.51663	3.21302	0.00958276	0.0454746	-3.38999
SLC1A1	0.906184	3.61418	3.21067	0.00962057	0.0455879	-2.88588
ZCCHC7	0.646908	4.85133	3.20444	0.0097214	0.0459397	-3.16468
SPINT1	0.955183	4.2344	3.20115	0.00977511	0.0461507	-3.02739
KPNA5	0.78208	3.98698	3.19679	0.00984679	0.0463601	-2.98766
RNF145	0.615516	7.52736	3.19388	0.00989483	0.0464917	-3.48872
MAML2	1.40655	2.52243	3.19371	0.00989767	0.0464917	-2.61651
PLPP5	0.859817	3.96246	3.19296	0.0099102	0.0464917	-2.99159
EPS8	0.728964	5.07487	3.19189	0.00992791	0.0465402	-3.23881
GTPBP1	0.705627	4.93522	3.19017	0.00995663	0.0466185	-3.26816
BICDL2	0.766342	4.14521	3.18869	0.0099812	0.0466726	-3.16375
ARL5B	0.573171	5.95558	3.18693	0.0100108	0.0467858	-3.31803
RAB11FIP1	0.534361	5.77796	3.18638	0.0100199	0.0468071	-3.34598
UGCG	0.641378	5.27248	3.18535	0.0100373	0.0468455	-3.21433
TMCC2	0.73732	4.28526	3.18205	0.010093	0.0470621	-3.18187
TMF1	0.96767	4.18067	3.17647	0.0101878	0.0473818	-2.94078
DRAM2	1.0279	4.48196	3.17369	0.0102353	0.047513	-3.15742
WDR55	0.623109	6.1141	3.17291	0.0102488	0.047549	-3.46116
STK36	0.584245	5.69323	3.17233	0.0102588	0.0475738	-3.43855
CTTNBP2NL	0.865219	4.76426	3.16956	0.0103065	0.0476499	-3.2684
PLD3	0.748594	4.80885	3.16912	0.0103141	0.0476499	-3.24194
CDK5R2	1.07077	2.55316	3.15851	0.0104994	0.0483152	-2.86485
IL11RA	0.950827	4.17745	3.15763	0.0105148	0.0483641	-3.14473
TTC17	0.655556	5.02782	3.15606	0.0105426	0.0484658	-3.32996
KMT2C	0.941709	3.84224	3.15483	0.0105643	0.0485043	-2.95164
NOP53	0.437927	7.51509	3.1534	0.0105896	0.0485987	-3.58785
VCAN	1.00324	3.63495	3.1524	0.0106075	0.0486477	-2.93911
LMO7	1.33904	2.64923	3.15081	0.0106358	0.0487033	-2.81412
KIAA1191	0.493639	6.61856	3.15078	0.0106363	0.0487033	-3.47059
TEF	1.11984	2.4997	3.14669	0.0107097	0.0489512	-2.90841
SIRT5	0.800405	5.09257	3.14519	0.0107367	0.0490525	-3.32335
COL6A1	0.588126	7.10228	3.14439	0.0107511	0.049096	-3.54638
PAPSS2	0.988714	3.35419	3.13775	0.0108716	0.0495132	-2.93631
SPG7	0.635414	5.94985	3.13634	0.0108973	0.049586	-3.44141
KREMEN2	0.676293	4.36072	3.13515	0.0109191	0.049663	-3.32948
DIP2A	0.695166	4.65434	3.13352	0.010949	0.049752	-3.31938
PPP2R2A	0.904313	7.17541	3.13348	0.0109498	0.049752	-3.55509
CCDC88C	0.548588	5.39597	3.13271	0.010964	0.0497585	-3.40036
MAPRE3	1.87569	1.32632	3.13182	0.0109804	0.0497942	-2.54732
PELI2	1.19506	2.22235	3.12862	0.0110395	0.0499462	-2.82834
ID2	0.717917	4.70697	3.12858	0.0110403	0.0499462	-3.24424
CREB3L2	0.87106	4.42369	3.12573	0.0110933	0.0501417	-3.06797
SIK2	0.577967	4.80055	3.12534	0.0111006	0.0501523	-3.36843
C12orf76	0.857513	3.42816	3.12436	0.0111189	0.0502125	-3.05776
SOX8	0.929326	3.22453	3.12278	0.0111485	0.0502793	-3.03812
TFAP2C	0.612364	5.00649	3.12179	0.011167	0.0503406	-3.36033
MEX3A	0.72856	4.65757	3.12115	0.0111789	0.0503498	-3.3129
CAMSAP2	0.664148	4.92504	3.11772	0.0112437	0.0505792	-3.24121
SYNM	1.90805	2.15403	3.11766	0.0112448	0.0505792	-2.84962
ANK3	0.85314	3.7717	3.11543	0.011287	0.0506764	-3.1436
PCDH7	0.491451	6.98992	3.1121	0.0113504	0.0508751	-3.55676
PCAT6	1.62203	2.86046	3.11209	0.0113506	0.0508751	-2.89735
MIA2	0.556011	4.97515	3.10513	0.0114842	0.0513608	-3.47022
RPL28	0.438046	9.30739	3.10264	0.0115323	0.051499	-3.77923
CHMP1B	0.82799	5.51431	3.10249	0.0115353	0.051499	-3.42898
PDK3	0.616025	4.53748	3.10103	0.0115636	0.0515521	-3.41552
SIM2	0.777427	4.02668	3.1008	0.0115681	0.0515521	-3.25107
GFPT2	1.39353	3.39649	3.10072	0.0115696	0.0515521	-3.03984
CD47	0.723622	5.90503	3.10031	0.0115776	0.0515521	-3.45456
MLEC	0.496846	7.50796	3.0991	0.0116012	0.051612	-3.66218
KSR1	0.960434	3.75806	3.09883	0.0116064	0.0516127	-3.26957
CRLF1	0.757511	8.58643	3.09856	0.0116117	0.0516136	-3.78865
VPS37C	0.619311	5.57462	3.09405	0.0117001	0.0518933	-3.49816
NBR1	0.47379	6.98288	3.09027	0.0117748	0.0521111	-3.63952
CHSY1	0.632508	5.57696	3.08875	0.0118049	0.0521764	-3.46764
TGIF2	0.628912	3.98046	3.08742	0.0118313	0.0522702	-3.3988
TAF7	0.589109	5.6937	3.08643	0.0118512	0.0523126	-3.41382
MT-RNR2	0.31267	13.9027	3.08605	0.0118586	0.0523228	-4.13473
DDN-AS1	0.6747	4.0001	3.08418	0.011896	0.0524573	-3.33185
TNFRSF10B	0.489162	7.08425	3.08401	0.0118994	0.0524573	-3.6645
N4BP2L2	0.90148	5.29332	3.079	0.0120003	0.0528563	-3.38441
DCAF5	0.793643	5.45041	3.07778	0.0120249	0.0528962	-3.55374
ENTPD2	0.632098	4.70664	3.07522	0.0120767	0.0530552	-3.41078
FKBP14	0.896648	3.55583	3.07211	0.0121401	0.0533107	-3.1462
GPR160	1.02354	3.39539	3.07173	0.012148	0.0533222	-2.94862
CERS6	0.693999	6.46567	3.07111	0.0121607	0.0533514	-3.58795
NPHP4	0.896575	3.82699	3.06952	0.0121933	0.0534521	-3.28231
WDR27	0.836576	3.44754	3.06751	0.0122346	0.0535177	-3.12849
NAA80	0.791185	2.87949	3.06711	0.0122429	0.0535291	-3.15337
STXBP1	0.782995	4.20305	3.06687	0.0122477	0.0535291	-3.1746
INPPL1	0.580337	7.04394	3.06556	0.0122748	0.0536017	-3.74219
OLMALINC	1.58446	2.11645	3.06492	0.012288	0.0536362	-2.77522
CASK	1.25387	4.91938	3.06367	0.0123139	0.05368	-3.45432
BCL2L1	0.525661	6.35108	3.06293	0.0123293	0.0536987	-3.59646
LPIN2	1.30768	3.00886	3.0627	0.012334	0.0536987	-3.01286
TSPYL2	0.989123	3.53745	3.06185	0.0123518	0.0537532	-3.08989
F2R	1.22084	4.00029	3.05786	0.0124349	0.0539803	-3.13062
RNF114	0.492995	6.52647	3.05767	0.0124391	0.0539803	-3.64584
PTPRS	0.575134	5.47965	3.05765	0.0124395	0.0539803	-3.55868
LINC-PINT	1.38512	2.82725	3.05754	0.0124418	0.0539803	-2.87031
NAP1L1P1	1.06293	2.51448	3.0571	0.0124511	0.0539803	-3.0782
ZFP36	1.97506	2.4653	3.05572	0.01248	0.054057	-2.66431
KRBOX4	1.08299	2.70168	3.0554	0.0124867	0.0540628	-2.91948
NINL	1.27583	2.15256	3.05512	0.0124926	0.0540657	-2.88745
GABARAPL2	0.889532	7.40484	3.05035	0.0125934	0.0543825	-3.75838
ABCA5	1.26568	3.15188	3.05014	0.0125979	0.0543825	-2.96755
RAB11FIP5	0.761388	6.47803	3.04756	0.0126527	0.0545726	-3.69679
TMEM41B	0.640258	5.40406	3.04646	0.0126761	0.0546507	-3.54406
TRPC1	1.72999	1.41421	3.03951	0.0128256	0.0551767	-2.7048
CLDN12	0.925598	4.20002	3.03927	0.0128307	0.0551767	-3.2634
ZNF711	0.659673	5.09217	3.0368	0.0128842	0.0553133	-3.41802
SYCP2L	1.2384	2.9182	3.0338	0.0129496	0.055524	-2.95614
ITPR3	0.486883	6.87488	3.03062	0.0130192	0.0557843	-3.69755
ITGA5	0.953043	3.77143	3.02795	0.013078	0.0559548	-3.19256
HOXB6	0.71565	4.63834	3.02668	0.013106	0.0560294	-3.34157
COL6A2	0.634785	5.36251	3.02629	0.0131145	0.0560313	-3.60182
KHNYN	0.532092	5.60821	3.02591	0.013123	0.0560313	-3.61539
SYNJ2	0.77437	4.4472	3.02346	0.0131775	0.0562168	-3.34705
TBC1D9B	0.5353	5.86605	3.02136	0.013224	0.0562871	-3.68751
TMEM87B	0.683567	4.60202	3.02131	0.0132251	0.0562871	-3.35662
KIAA1217	0.903672	3.53809	3.0206	0.0132411	0.0562871	-3.29543
RCAN2	1.00382	2.57714	3.01976	0.0132599	0.0563324	-3.08776
MAML3	0.790944	3.17869	3.01638	0.0133357	0.0566073	-3.28071
SH3KBP1	0.514931	6.47069	3.01496	0.0133676	0.0566642	-3.67502
SPTB	1.16238	2.22009	3.01302	0.0134116	0.0567045	-3.00013
WIPF2	0.605221	6.98781	3.0124	0.0134255	0.0567045	-3.7604
FMNL2	0.637086	5.98947	3.00997	0.0134807	0.0568435	-3.61829
DHRS13	0.620715	4.57099	3.00921	0.013498	0.0568929	-3.56509
ZNF721	0.761582	4.76721	3.00523	0.013589	0.0571579	-3.46501
S100A13	0.399939	8.10118	3.0029	0.0136425	0.0572883	-3.88654
FAM160B1	0.753488	3.94304	3.00206	0.0136618	0.0573458	-3.35046
CLDN4	0.426434	7.75497	2.99948	0.0137214	0.0575011	-3.86417
HGSNAT	0.681028	4.12217	2.99812	0.013753	0.0576098	-3.43352
GRAMD2B	0.672241	4.12824	2.99572	0.0138089	0.0577963	-3.4358
MT-TS2	1.90622	1.94752	2.99285	0.0138758	0.057981	-2.86243
MTMR11	1.45498	2.71606	2.99154	0.0139065	0.0580379	-3.0411
ANO8	0.810135	4.1595	2.991	0.0139191	0.0580668	-3.25645
MIR222HG	1.17988	3.35501	2.98782	0.0139943	0.0583323	-3.11191
CRABP2	0.438996	7.93486	2.98669	0.0140209	0.0583725	-3.83935
RUNDC3A-AS1	1.44552	1.67814	2.98535	0.0140527	0.058404	-2.92013
SAMD5	1.0231	2.69754	2.98507	0.0140594	0.058404	-3.05721
RPS11P5	0.685192	3.02152	2.98472	0.0140676	0.058404	-3.48481
ATP2B4	0.606375	5.06861	2.97954	0.0141913	0.0587701	-3.51938
MORN4	0.662781	4.24309	2.97402	0.0143241	0.0592181	-3.50457
ATRX	0.497017	6.65765	2.97162	0.0143824	0.0593236	-3.79121
CMTM6	0.700399	8.33397	2.96968	0.0144295	0.0594565	-3.94275
ANKH	0.572664	5.21346	2.96569	0.0145272	0.0597379	-3.67075
TUBG2	0.688213	3.91105	2.96194	0.0146195	0.0600533	-3.51682
GRAMD1A	0.574735	6.23656	2.95309	0.0148397	0.0607246	-3.80344
JRKL	1.21694	2.93535	2.95293	0.0148437	0.0607246	-3.14488
SLC35F3	0.747085	3.55905	2.94816	0.0149639	0.0610248	-3.44475
CECR2	1.15271	2.91529	2.94659	0.0150038	0.0611519	-3.11232
KLF5	0.80412	5.73621	2.94646	0.0150071	0.0611519	-3.66955
CCDC107	0.589209	4.8156	2.94553	0.0150306	0.0611984	-3.76531
NECTIN3	0.55558	5.3712	2.94206	0.015119	0.061457	-3.72249
SLC41A1	0.684258	4.71707	2.94136	0.015137	0.0614638	-3.61495
ZNF185	0.731609	4.1349	2.93987	0.0151753	0.0615718	-3.4978
GARS	0.701355	6.14002	2.93981	0.0151767	0.0615718	-3.78428
LRP8	0.620528	4.68043	2.93862	0.0152072	0.0616709	-3.61197
PKM	0.430118	9.64185	2.9371	0.0152466	0.061806	-4.07206
SPICE1	0.928881	3.53281	2.93496	0.0153017	0.0619324	-3.31185
NR2F2-AS1	1.14809	2.21861	2.93425	0.0153202	0.0619324	-3.17721
SCARNA14	3.77989	0.378151	2.93424	0.0153203	0.0619324	-2.81252
ETS1	1.32829	2.74831	2.933	0.0153526	0.0620048	-3.02393
MT-TT	0.877302	3.72929	2.92804	0.0154819	0.0622639	-3.28302
NSD3	0.521038	5.637	2.92746	0.015497	0.0623001	-3.73759
FOXN3	0.537021	5.09788	2.92675	0.0155156	0.0623298	-3.75845
WDR26	0.943957	5.64057	2.92671	0.0155166	0.0623298	-3.74678
TRIQK	0.998082	3.74261	2.92599	0.0155357	0.0623656	-3.37303
OSGIN2	0.556444	5.49927	2.9248	0.0155669	0.062458	-3.71022
EXD3	0.750702	4.03806	2.92366	0.0155969	0.0625534	-3.51698
LCOR	0.624494	5.40906	2.92326	0.0156076	0.0625614	-3.68985
R3HDM4	0.896388	5.90014	2.92312	0.0156112	0.0625614	-3.73452
RPL13	0.387807	11.2423	2.92217	0.0156363	0.0626375	-4.25353
NIPA1	0.781118	5.2649	2.92106	0.0156657	0.062721	-3.69798
FNDC3B	0.791348	4.36163	2.92092	0.0156695	0.062721	-3.64641
AMOTL1	0.569782	5.36125	2.91917	0.0157158	0.0628571	-3.79102
LURAP1L	1.35446	2.01298	2.91818	0.0157423	0.0629058	-2.99492
FAM131A	1.37588	4.79693	2.91779	0.0157527	0.0629058	-3.60557
RSRC2	0.419873	7.19059	2.91566	0.0158095	0.0631079	-3.98508
CEP112	1.14115	2.69527	2.91336	0.0158711	0.0632105	-3.26419
MYOM3	1.35654	2.60838	2.91309	0.0158784	0.0632105	-3.21646
HS3ST1	0.512866	5.98886	2.91196	0.0159087	0.0632805	-3.77666
GPC4	0.727358	4.48962	2.91032	0.015953	0.0633822	-3.57284
ITCH	0.975298	3.02005	2.90923	0.0159824	0.0634667	-3.29498
KIAA1109	0.574296	5.47397	2.90897	0.0159894	0.0634667	-3.81443
AAK1	0.489877	5.38497	2.90793	0.0160176	0.0635397	-3.85675
TRIO	0.80754	4.27892	2.9069	0.0160455	0.0636007	-3.46049
SEC31B	0.789819	3.95386	2.90596	0.0160711	0.063653	-3.63166
AHDC1	0.964251	5.29285	2.9053	0.0160891	0.0636745	-3.74015
SNAPC3	0.775176	4.21562	2.90395	0.016126	0.0637959	-3.4067
TMSB4X	1.60683	4.47803	2.90313	0.0161482	0.0638588	-3.57715
NORAD	0.464248	7.80618	2.90261	0.0161625	0.0638904	-3.92871
C16orf72	0.60553	5.51501	2.90124	0.0162002	0.0639649	-3.81787
TNRC6C-AS1	1.13068	2.98407	2.90046	0.0162214	0.0639992	-3.33511
CGGBP1	0.556234	5.32483	2.89846	0.0162764	0.0641854	-3.72356
KATNAL1	0.958866	4.11519	2.89725	0.0163099	0.0642486	-3.47017
HIPK3	0.536467	5.50661	2.89691	0.0163191	0.06426	-3.75195
RPL26P19	1.02056	3.7058	2.89553	0.0163574	0.064361	-3.48284
ZNF362	0.938165	3.31924	2.89528	0.0163643	0.0643633	-3.40348
NUCB2	0.562926	5.11584	2.89484	0.0163764	0.0643861	-3.69211
FAM234B	0.970176	3.1499	2.89445	0.0163874	0.0644043	-3.26502
DUSP16	0.776025	4.2617	2.89311	0.0164245	0.0645252	-3.58829
ZXDC	0.681577	4.669	2.89188	0.0164588	0.0646084	-3.7608
MELTF	0.481434	6.59742	2.88875	0.0165463	0.0648945	-3.98931
JAG1	0.599878	5.67454	2.886	0.0166233	0.0651334	-3.83292
RRNAD1	0.987681	3.46181	2.88598	0.0166241	0.0651334	-3.40793
LIF	1.15783	4.30862	2.88423	0.0166734	0.0652763	-3.41316
PSD3	0.642496	4.99058	2.88365	0.0166897	0.0652899	-3.68714
PLEKHH2	1.07358	2.78094	2.88138	0.0167539	0.0654492	-3.22181
ADAMTS13	1.49013	2.2808	2.8813	0.0167561	0.0654492	-3.26985
RGS17	1.0164	2.85845	2.87949	0.0168076	0.0656173	-3.24501
GRM4	1.25152	3.22368	2.87934	0.0168121	0.0656173	-3.26575
HCFC1R1	0.482323	5.88079	2.8765	0.0168931	0.0657822	-3.91525
ACSL4	0.642387	6.34959	2.8757	0.0169158	0.0658252	-3.90515
RPS23P8	0.815883	3.09989	2.87566	0.0169171	0.0658252	-3.42357
PLS3	0.59211	5.7046	2.87131	0.017042	0.0661601	-3.79382
CACNA1H	0.719081	4.39738	2.87131	0.0170421	0.0661601	-3.67827
ZNF827	0.795381	3.95695	2.86938	0.0170979	0.0663515	-3.44336
UBA6-AS1	0.781661	3.30057	2.86799	0.0171384	0.066483	-3.44187
PSMA3-AS1	0.766886	4.66216	2.8672	0.0171613	0.0665465	-3.65087
PLCB1	0.855519	4.04982	2.86059	0.0173544	0.0671421	-3.49282
CAMK2D	0.455967	6.33954	2.85872	0.0174095	0.0673103	-3.9468
CD9	1.44263	9.20397	2.85866	0.0174111	0.0673103	-4.18897
ING4	0.673521	4.11717	2.85748	0.0174461	0.0673943	-3.74709
ZC4H2	0.548606	4.0468	2.85344	0.0175661	0.0677291	-3.78301
RPS12	0.332946	13.5306	2.8524	0.0175969	0.0678223	-4.51138
PINK1	0.455541	5.79766	2.85036	0.0176577	0.0679627	-3.95119
UBA6	0.577139	5.85997	2.84998	0.0176693	0.0679727	-3.91696
CRIM1	0.975963	3.48093	2.84972	0.0176768	0.0679761	-3.32475
SEMA6A	1.51192	1.84833	2.84694	0.0177606	0.0681997	-3.18624
BIRC2	0.483178	6.67788	2.8459	0.0177918	0.0682378	-3.97572
TTBK2	1.25698	2.5347	2.83415	0.0181496	0.0692678	-3.25808
TADA3	0.558699	5.83058	2.83261	0.0181971	0.0693629	-3.93554
BMP1	0.585759	4.89029	2.83228	0.0182072	0.0693629	-3.8572
TMEM200B	0.598095	4.95227	2.83226	0.0182078	0.0693629	-3.85567
SERINC3	0.597592	5.7493	2.82706	0.0183692	0.0697946	-3.94171
PCGF3	0.454259	7.04338	2.82662	0.0183826	0.0698198	-4.09149
CNOT8	0.635027	5.06072	2.82637	0.0183906	0.0698239	-3.73484
SNHG3	0.657095	6.9026	2.82551	0.0184173	0.0698993	-4.02692
B4GALT5	0.833161	7.8659	2.82062	0.0185709	0.0704033	-4.19024
FA2H	1.05275	3.38135	2.8158	0.018723	0.0708586	-3.33744
CCS	0.632918	3.88886	2.81528	0.0187397	0.0708586	-3.82675
ITM2C	0.719585	5.42934	2.81196	0.0188454	0.0711789	-3.95152
TTC39C	0.504587	5.21188	2.81045	0.0188938	0.0712826	-3.96726
ARFGEF1	0.967619	4.50221	2.80961	0.0189205	0.071333	-3.83506
TMEM25	0.737725	4.04831	2.80959	0.0189212	0.071333	-3.70125
HIST1H2AC	1.15486	2.27874	2.80793	0.0189748	0.0714742	-3.27939
CDK8	0.882538	4.67198	2.80773	0.0189812	0.0714742	-3.7535
TPM4	0.499307	5.99998	2.80538	0.0190569	0.0715529	-3.93431
DIRAS3	0.719486	3.77675	2.80051	0.0192149	0.0720135	-3.80533
JMJD6	0.614611	5.60074	2.79794	0.0192988	0.0722481	-4.01472
LINC02454	1.17347	2.05837	2.79218	0.0194884	0.0727704	-3.2729
GAL3ST4	0.948124	3.0834	2.78841	0.0196134	0.0731091	-3.51491
LAMB1	0.655921	5.2623	2.78832	0.0196163	0.0731091	-3.8968
ITGAV	0.525772	5.15122	2.78814	0.0196222	0.0731091	-3.91614
TENT4A	0.501824	5.39046	2.78783	0.0196327	0.0731216	-3.94087
PROS1	1.33493	2.86839	2.7816	0.0198413	0.0736677	-3.19286
SRP14-AS1	1.08363	2.67346	2.78014	0.0198903	0.0737842	-3.48053
CUX1	0.439995	6.5992	2.77985	0.0199001	0.0737935	-4.13672
POLR3D	0.529834	5.05895	2.77914	0.0199241	0.0738554	-4.01908
VAT1	0.390769	7.75912	2.77434	0.0200871	0.0740372	-4.25288
TUG1	0.529251	4.61808	2.77427	0.0200895	0.0740372	-3.92828
POM121C	0.572024	4.67075	2.77162	0.0201801	0.0743174	-3.99456
ACTN1	0.360296	8.00859	2.77094	0.0202034	0.0743764	-4.27113
MED26	0.748942	4.16252	2.77069	0.0202119	0.0743807	-3.86322
UBR5-AS1	1.29528	2.5753	2.76992	0.0202381	0.0744028	-3.34325
DNMBP	0.623775	6.16809	2.76966	0.0202472	0.0744028	-4.06614
THOC6	0.87661	2.13268	2.76772	0.0203138	0.074567	-3.52917
PPFIA1	0.505693	5.55676	2.76747	0.0203227	0.0745727	-4.03267
IL13RA1	0.501037	5.90936	2.76474	0.0204168	0.0748101	-4.09744
SFXN3	0.464666	5.14696	2.76386	0.0204473	0.0748951	-4.09731
PRELID2	0.946784	3.14677	2.76343	0.0204622	0.0749225	-3.5329
ANAPC16	0.443629	6.49167	2.7631	0.0204737	0.0749235	-4.12706
CCNL1	0.667804	5.99044	2.76077	0.0205549	0.0750989	-4.0022
TSC22D1	0.363707	8.56898	2.75721	0.0206793	0.0753922	-4.31368
FXYD5	0.576578	5.0236	2.75655	0.0207025	0.0754497	-3.89874
PSD	0.81283	2.90603	2.75595	0.0207236	0.0754995	-3.60002
GYS1	0.520191	6.08816	2.75538	0.0207436	0.0755454	-4.09915
SLC36A4	0.753573	3.66045	2.75411	0.0207884	0.0756542	-3.6578
IL15RA	1.28527	2.11491	2.75373	0.0208019	0.0756765	-3.31926
CCNB1IP1	0.909037	4.89828	2.75276	0.0208362	0.075724	-3.89101
ETV4	0.486754	5.48175	2.75273	0.0208373	0.075724	-4.10941
ZNF808	1.0242	3.16466	2.75208	0.0208601	0.0757798	-3.62113
SFXN1	0.454862	7.3529	2.75162	0.0208766	0.0757876	-4.24606
UNC5B	0.566924	4.60326	2.7516	0.0208771	0.0757876	-3.9198
B3GNT4	0.75304	3.08843	2.75097	0.0208997	0.0758215	-3.63923
TMEM51	0.649916	5.09618	2.749	0.0209697	0.0760151	-3.97952
STPG1	0.747979	2.35586	2.74711	0.0210368	0.0761756	-3.64581
AIG1	0.542137	5.45345	2.74588	0.0210808	0.0762819	-4.07641
DOC2A	1.31239	2.20144	2.74433	0.0211365	0.0764294	-3.39257
MTCL1	0.670285	3.90721	2.743	0.0211841	0.0765199	-3.75704
PDE4A	0.455792	5.87834	2.7417	0.021231	0.0766621	-4.11479
GRB10	0.599699	5.568	2.74034	0.0212799	0.0768113	-4.12911
KIAA1958	1.22402	3.25132	2.73871	0.0213391	0.07691	-3.51942
FBLN5	1.78777	1.42835	2.73802	0.0213641	0.0769303	-3.17762
TMEM54	0.596652	5.63113	2.73797	0.0213657	0.0769303	-4.06547
AMPD3	0.632066	4.22123	2.73519	0.0214669	0.0771853	-3.85495
TNKS	0.588184	5.02863	2.73253	0.0215639	0.0774793	-3.96596
TMEM132A	0.550153	5.77037	2.73202	0.0215826	0.0774892	-4.08141
NLGN2	0.935979	4.55759	2.72929	0.0216827	0.0777143	-3.82014
PCNX2	0.714913	4.21042	2.72851	0.0217117	0.0777907	-3.94099
LTBP1	0.966633	2.61686	2.72776	0.0217394	0.0778625	-3.47827
PCED1A	0.602137	6.15675	2.72299	0.0219162	0.0782478	-4.249
SCN5A	1.04683	2.38773	2.72259	0.0219308	0.0782682	-3.51458
CACNA1G	1.58492	1.72261	2.72224	0.0219441	0.0782682	-3.28912
CCDC186	0.478171	5.43194	2.72201	0.0219526	0.0782682	-4.0677
MFGE8	0.635255	5.69551	2.72114	0.0219849	0.0783559	-4.09145
OSBPL2	0.540361	5.01996	2.71873	0.022075	0.0786062	-4.03547
FAM114A1	0.611476	4.45891	2.71651	0.0221583	0.0788359	-3.85131
ARHGEF10L	0.609568	5.33137	2.71609	0.0221743	0.0788652	-4.10956
CYTOR	0.654932	5.23666	2.71507	0.0222125	0.0789736	-3.98213
ZNF133	1.06986	2.35301	2.71481	0.0222225	0.0789813	-3.54951
PAIP2B	1.02908	3.15072	2.71135	0.0223532	0.0793629	-3.68208
LATS2	0.703759	3.78164	2.71021	0.0223967	0.0794617	-3.79293
RAB11FIP4	0.581604	5.47687	2.70746	0.0225016	0.0796803	-4.19727
ACADVL	0.467353	6.94289	2.70745	0.022502	0.0796803	-4.2914
ZNF25	0.817612	2.99732	2.70684	0.0225251	0.079723	-3.77545
XRN1	0.76633	4.14132	2.7049	0.0225995	0.0799583	-3.807
CYTH4	0.73943	3.14401	2.70355	0.0226512	0.0800611	-3.78079
ARID4B	0.629698	5.94915	2.70243	0.0226943	0.080133	-4.13708
XYLT2	0.491247	5.97998	2.70239	0.0226961	0.080133	-4.26803
ITSN2	0.637175	4.41354	2.70206	0.0227089	0.0801458	-3.84886
ITPRID2	0.424827	8.13125	2.70148	0.0227311	0.0801584	-4.33296
LIN54	1.05788	3.86301	2.69793	0.0228684	0.0806018	-3.88572
L1CAM	1.2532	2.41472	2.6962	0.0229359	0.0807836	-3.3506
PLCB4	1.06385	2.59239	2.69504	0.0229808	0.0808578	-3.49809
USP37	0.529942	5.21347	2.69445	0.023004	0.0809115	-4.10587
ARSJ	1.29649	2.01474	2.69339	0.0230452	0.0809726	-3.34575
ATP7A	1.12755	2.95108	2.69092	0.0231423	0.0812267	-3.49069
CCDC28A	0.759371	4.30827	2.69081	0.0231465	0.0812267	-3.94572
CHMP4C	0.621359	4.98524	2.68996	0.0231802	0.0813064	-4.07714
MNX1	0.932824	5.03472	2.68773	0.0232678	0.0815226	-4.13215
CRKL	0.536882	5.4378	2.68758	0.0232739	0.0815226	-4.06084
FKBP8	0.822531	3.66371	2.68724	0.0232873	0.0815417	-3.82061
BMT2	0.546299	4.46815	2.68585	0.0233425	0.0816507	-4.00561
MIR4435-2HG	0.759439	4.41599	2.68499	0.0233765	0.0817414	-3.84449
DYM	0.70028	4.79073	2.68378	0.0234245	0.081825	-3.97388
PDLIM7	0.879598	3.73908	2.68217	0.0234886	0.0820151	-3.78538
ZFYVE19	0.759196	4.66831	2.68197	0.0234965	0.0820151	-4.11782
PRKCA	0.651885	4.14611	2.68079	0.0235439	0.0821292	-3.89981
COG3	0.6506	4.2485	2.68058	0.0235521	0.0821296	-3.92187
CNFN	0.511362	5.09681	2.67883	0.0236221	0.0823452	-4.15843
IRS1	0.521334	5.48711	2.67863	0.0236301	0.0823452	-4.1614
C1orf21	0.607031	4.46405	2.67615	0.0237298	0.0825799	-4.05334
SDCBP	0.524258	7.84135	2.6736	0.0238328	0.0827406	-4.41159
SNX33	0.997016	3.38276	2.67324	0.0238476	0.0827406	-3.66028
RPL27A	0.299973	12.9466	2.67293	0.02386	0.0827415	-4.8156
APBB3	0.872469	3.60837	2.67279	0.0238657	0.0827415	-3.97981
FAM168A	0.828603	3.9002	2.67172	0.0239091	0.0828354	-3.79544
FADS3	0.53432	4.84252	2.67107	0.0239354	0.0828961	-4.08681
ATRN	0.908177	5.28264	2.67035	0.0239647	0.0828961	-4.1242
ZSCAN9	0.816498	3.94464	2.67029	0.0239673	0.0828961	-3.76825
ACER3	0.749785	4.39737	2.66597	0.0241437	0.0832184	-3.94126
KDM3B	0.504587	5.44364	2.66573	0.0241537	0.0832184	-4.21529
SCARB2	0.464984	6.09564	2.66369	0.0242373	0.0834614	-4.25516
IGFBP6	0.50776	5.59953	2.66313	0.0242603	0.0835037	-4.24497
LOXL4	1.24606	2.02504	2.66088	0.0243534	0.0837627	-3.56174
NFAT5	0.827893	3.14307	2.66062	0.0243639	0.0837627	-3.79788
GGPS1	0.684686	4.06272	2.65949	0.0244109	0.0838604	-3.84913
ZNF554	0.661642	3.18745	2.65219	0.0247151	0.0847909	-3.86531
ICAM5	1.05877	3.2324	2.65119	0.0247573	0.0848499	-3.66422
C19orf33	0.580883	4.74897	2.65014	0.0248013	0.0849723	-4.10739
KDSR	0.789374	5.04583	2.64841	0.0248743	0.0850991	-4.15835
LTA4H	0.577168	7.90765	2.6477	0.0249043	0.0851284	-4.47297
CALCOCO1	1.66373	1.87624	2.64741	0.0249167	0.0851284	-3.3676
SGSM1	0.768927	4.4814	2.6472	0.0249257	0.0851284	-4.0632
APLP2	0.333343	8.79103	2.64621	0.0249675	0.0851975	-4.5334
BBS2	0.612504	4.82797	2.64356	0.0250802	0.0854444	-4.07889
ST3GAL6	0.72113	3.982	2.63845	0.0252985	0.0860681	-3.88598
CHIC2	0.970152	2.87291	2.63771	0.0253304	0.0860681	-3.61084
RHBDF1	0.71393	3.33569	2.63765	0.0253332	0.0860681	-3.92431
RPL39	0.63367	9.28249	2.63748	0.0253403	0.0860681	-4.5771
LCORL	0.544933	4.60211	2.63721	0.0253521	0.0860771	-4.08065
KDM4C	1.50423	2.36753	2.63696	0.0253626	0.0860842	-3.50476
STAMBPL1	0.845057	3.95626	2.63571	0.0254168	0.0861847	-3.91338
DOCK6	0.504583	5.16188	2.63569	0.0254177	0.0861847	-4.22082
MANBA	1.06335	4.56049	2.63355	0.0255102	0.0864407	-3.86374
GOT1	0.435025	7.24762	2.63287	0.0255397	0.0864543	-4.42151
EML4	0.741342	7.06581	2.62892	0.0257115	0.0870069	-4.47259
CBARP	0.773521	4.20812	2.62702	0.0257942	0.0872001	-4.08044
CTNNA1	0.608168	7.37464	2.62189	0.02602	0.0875546	-4.47101
GAS7	1.23356	2.28036	2.62151	0.0260367	0.0875546	-3.65013
CLIP4	0.791033	3.65831	2.61809	0.0261885	0.0878907	-3.85757
OGDHL	0.740039	3.60765	2.6171	0.0262328	0.0880105	-3.93516
MKRN1	0.6359	5.94196	2.61674	0.0262488	0.0880351	-4.2831
SH3D19	0.719365	3.73905	2.61586	0.026288	0.0881374	-3.85379
EDA	0.784177	3.8524	2.61297	0.0264171	0.0885122	-4.15275
NFKB2	0.775669	3.17873	2.61262	0.0264327	0.0885351	-3.87524
ZMYM3	0.424642	5.84499	2.61063	0.0265225	0.0887001	-4.33679
OSBPL8	0.516847	5.99798	2.61032	0.0265362	0.0887067	-4.29852
IQCH	1.24164	1.97747	2.61007	0.0265477	0.0887159	-3.44872
CUL9	0.566297	4.05896	2.60542	0.0267578	0.089301	-4.16197
TBC1D19	0.669015	3.56137	2.60516	0.0267698	0.0893025	-4.01504
TPR	0.729101	6.71254	2.60503	0.0267758	0.0893025	-4.41734
ATF6	0.649225	5.22429	2.6024	0.0268954	0.089571	-4.29537
SNX14	0.465819	6.31863	2.6023	0.0269003	0.089571	-4.37875
MAP3K5	0.958333	3.47533	2.60099	0.0269599	0.0897106	-3.77595
CFAP53	1.43649	1.9143	2.59912	0.0270458	0.0899669	-3.46316
PLEKHA5	0.552995	4.65738	2.59841	0.0270783	0.0899869	-4.17623
RALGPS2	0.454821	5.82212	2.59817	0.0270894	0.0899922	-4.33561
NTNG2	0.870869	2.70916	2.59796	0.0270992	0.0899922	-3.95991
ERF	0.434651	5.84147	2.59761	0.0271152	0.0899922	-4.37058
ADAM10	0.552911	6.16156	2.59637	0.0271721	0.0901221	-4.35571
TRAF3IP2-AS1	0.710054	2.84767	2.59565	0.0272057	0.090151	-3.87516
TET2	0.777365	3.2717	2.59557	0.0272094	0.090151	-3.84307
ZNF557	0.656064	5.06389	2.59542	0.0272162	0.090151	-4.34195
TCF7L1	0.573585	4.58823	2.59426	0.0272696	0.0902631	-4.17715
SAMD11	0.99921	2.45023	2.59392	0.0272855	0.0902631	-3.76373
PEAK1	0.564055	5.21124	2.59292	0.027332	0.0903287	-4.30258
CLHC1	0.770652	2.92878	2.58842	0.0275415	0.0908736	-3.88641
DENND4B	0.658303	4.73186	2.58545	0.0276809	0.0912153	-4.2155
LPAR1	0.880538	4.07033	2.58491	0.027706	0.0912683	-4.00135
LIFR	1.05969	2.98401	2.58438	0.0277313	0.0913222	-3.72488
UPRT	0.915554	3.59927	2.58233	0.0278278	0.0915806	-3.86963
EFNB1	0.788043	3.77562	2.57909	0.0279811	0.0919959	-3.93501
ATXN1	0.771834	3.94097	2.57687	0.0280867	0.0922123	-3.9614
MPZL2	0.506452	6.45118	2.57654	0.0281025	0.0922164	-4.42066
SCD5	0.694104	5.66487	2.57631	0.0281134	0.0922226	-4.30055
CSDE1	0.366743	10.1432	2.5761	0.0281235	0.0922259	-4.78643
RAB5A	0.458722	6.41344	2.57539	0.0281575	0.0923078	-4.41065
SEC24D	1.11323	3.73336	2.57421	0.0282139	0.092433	-3.80043
MAP3K14	0.653662	3.01881	2.56988	0.0284223	0.0930558	-4.04293
PFDN2	0.546295	7.50125	2.56894	0.0284677	0.0931613	-4.54569
CD55	0.727795	4.5807	2.56827	0.0285	0.0931726	-4.11133
MGAT5	0.473359	5.93791	2.56817	0.0285049	0.0931726	-4.44562
SMIM29	0.695601	4.8946	2.56674	0.0285738	0.0932933	-4.27878
HMG20A	0.55927	5.19444	2.56656	0.0285826	0.0932933	-4.24394
FAM149B1	0.625449	3.85572	2.56492	0.0286626	0.0933921	-4.08441
SPATS2	0.496981	5.55196	2.56461	0.0286775	0.0934105	-4.35185
SYVN1	0.592297	5.13391	2.56322	0.0287453	0.0935953	-4.21414
BRWD1	0.47283	5.86948	2.56307	0.0287526	0.0935953	-4.34879
COMMD6	0.7018	7.96508	2.56202	0.0288037	0.0936971	-4.58193
ZNF518A	0.62591	4.92682	2.56186	0.0288115	0.0936971	-4.18915
MEF2A	0.533419	4.73005	2.5607	0.0288684	0.0937922	-4.19617
OGT	0.546626	5.57426	2.56031	0.0288876	0.0938249	-4.34636
IVNS1ABP	0.437648	7.31863	2.55864	0.0289694	0.0940394	-4.58256
RNF10	0.421378	7.11105	2.5582	0.0289913	0.0940716	-4.59315
CSNK2A2	0.534762	6.59073	2.55612	0.0290938	0.0943441	-4.50046
SPINT2	0.586379	8.89614	2.55381	0.0292081	0.0946241	-4.65821
KIF13B	0.740969	3.10845	2.55333	0.0292318	0.0946406	-3.96367
AJUBA	0.582485	4.45118	2.55144	0.0293257	0.0947641	-4.15421
CC2D1A	0.914817	3.26132	2.5511	0.0293429	0.0947641	-3.92506
EIF4G3	0.68057	3.78766	2.5505	0.0293727	0.0947956	-4.00572
NPEPL1	0.766197	2.61105	2.54997	0.029399	0.0948201	-3.89618
SIL1	0.469818	4.9546	2.5479	0.0295027	0.0950041	-4.39656
LEPR	1.13457	2.48068	2.54685	0.0295549	0.0951423	-3.60918
IGFBP2	0.495634	7.4795	2.54595	0.0296002	0.0951699	-4.56958
ZNF451	0.728701	6.3836	2.54457	0.0296697	0.0953307	-4.52605
CFDP1	0.488587	6.01282	2.54425	0.0296858	0.0953525	-4.46754
GGT7	1.61483	1.69861	2.54341	0.0297279	0.0954274	-3.47116
SAP30	0.860326	3.98087	2.54193	0.0298031	0.0956385	-3.88324
VAMP2	0.766981	4.08337	2.53913	0.0299446	0.0960322	-4.09574
SETD5	0.44856	7.0442	2.53656	0.0300759	0.0964227	-4.6117
TFAP2A	0.596804	4.78415	2.53566	0.0301219	0.0964943	-4.29307
C19orf81	0.752873	3.51869	2.53313	0.0302513	0.0968024	-3.92953
ZC3H12A	0.577463	4.19816	2.53212	0.0303033	0.096938	-4.31765
NCOR1	0.571586	4.93999	2.53127	0.0303467	0.0970466	-4.27748
GABRD	0.460742	5.33946	2.52766	0.0305334	0.0975821	-4.47242
DOCK5	0.762508	4.3524	2.52661	0.0305877	0.0976944	-4.13408
CLCF1	1.31627	2.52031	2.52634	0.0306021	0.0977097	-3.6226
SNORD6	1.97003	1.58729	2.52555	0.0306431	0.0977794	-3.50582
ESYT2	0.479664	6.68428	2.525	0.0306714	0.0978391	-4.5625
CTHRC1	0.741636	4.74621	2.52005	0.0309302	0.0984792	-4.22988
PLOD3	0.543876	5.51086	2.5182	0.0310274	0.098758	-4.47281
NUP58	0.804356	4.64168	2.51383	0.0312585	0.0992761	-4.13569
SAMD4B	0.471644	5.65519	2.51227	0.0313408	0.0995066	-4.45921
GEM	1.51994	1.23163	2.51186	0.0313629	0.0995457	-3.46903
SLC1A4	0.91233	2.6011	2.50973	0.0314762	0.0997583	-3.92116
SESN3	0.900558	3.54288	2.50964	0.0314811	0.0997583	-4.12158
SNX21	0.802073	2.91791	2.5095	0.0314887	0.0997583	-3.98495
CD99	0.551854	5.87251	2.50356	0.0318074	0.10058	-4.44383
MBD6	0.724126	4.03199	2.50234	0.0318736	0.100665	-4.20478
TTC39A	0.503699	4.2853	2.5015	0.0319191	0.100777	-4.39157
KRR1	0.755711	7.83343	2.49884	0.0320632	0.101138	-4.67974
GPBP1L1	0.428004	6.87062	2.49855	0.0320791	0.101151	-4.62726
KNDC1	2.16991	1.38116	2.4984	0.0320872	0.101151	-3.63856
PPL	0.722907	3.78615	2.49785	0.0321169	0.101213	-4.08659
MLPH	0.486124	5.93764	2.4968	0.0321741	0.101352	-4.55774
C1orf226	1.37256	3.12717	2.49668	0.0321808	0.101352	-3.90828
CYP4F11	1.15316	1.85414	2.49613	0.0322109	0.101383	-3.68945
ABRAXAS1	0.839867	4.07295	2.49508	0.0322685	0.101477	-4.18655
ERGIC1	0.614584	7.23388	2.49468	0.0322903	0.101477	-4.69693
CNN3	0.657054	6.51679	2.49397	0.032329	0.101536	-4.51759
TUBA4A	0.399803	7.19686	2.49285	0.0323908	0.101698	-4.70729
IGBP1	0.461811	6.5817	2.49218	0.0324272	0.101781	-4.5599
CAB39	0.926058	4.93317	2.49016	0.0325387	0.102013	-4.21763
FMC1	0.418735	5.76213	2.48702	0.0327123	0.102424	-4.59917
RIN1	0.485153	4.94761	2.48472	0.03284	0.102749	-4.43546
SPATA1	0.787783	2.83864	2.48433	0.0328618	0.102765	-4.0438
CAV1	0.421378	6.43697	2.4818	0.033003	0.103112	-4.56373
FOXA2	0.754004	3.47485	2.48097	0.0330494	0.103193	-4.02896
CDC42EP3	0.547891	5.68393	2.47973	0.0331194	0.103275	-4.52296
SOX9	0.47522	7.42406	2.47942	0.0331365	0.103275	-4.6659
BBC3	0.532677	7.50733	2.47793	0.0332202	0.103455	-4.72586
CCDC174	0.573247	4.60251	2.47767	0.0332348	0.103455	-4.3946
SPATA2L	0.753416	3.30737	2.47621	0.0333173	0.10367	-4.04459
NPEPPS	0.398908	8.56354	2.47591	0.0333346	0.10367	-4.78652
KCNK1	0.76339	4.09899	2.47257	0.0335237	0.104131	-4.0401
ADCY6	1.39275	2.74599	2.47204	0.033554	0.104186	-3.89953
DDX60L	0.716243	3.41327	2.47042	0.0336461	0.104384	-4.07228
ARHGAP32	0.601147	4.47596	2.46776	0.0337981	0.10476	-4.25828
ACSS2	0.791175	3.43733	2.46591	0.0339042	0.105057	-4.05975
MON1B	0.532259	4.9319	2.46277	0.0340853	0.105489	-4.43485
AARS	0.497603	7.11241	2.45939	0.0342811	0.105999	-4.68923
PYGL	0.439146	6.3725	2.45566	0.0344985	0.106574	-4.61515
NAGS	0.74434	3.9749	2.45434	0.0345758	0.106755	-4.2721
S100A16	0.365383	7.57011	2.45409	0.0345903	0.106755	-4.75698
EHD4	0.496074	4.89276	2.45213	0.0347055	0.106954	-4.52554
BMPR2	0.786681	4.16892	2.4505	0.0348012	0.107216	-4.18934
MTA1	0.616676	7.25223	2.4496	0.0348543	0.107314	-4.67796
BRK1	0.354362	7.53733	2.44852	0.0349183	0.107428	-4.75917
MTMR3	0.617556	4.49293	2.44785	0.0349579	0.107455	-4.3733
SARS	0.373134	6.26627	2.44776	0.0349633	0.107455	-4.66672
RB1CC1	0.907479	4.50852	2.44718	0.0349979	0.107527	-4.20029
MOB1B	0.882131	4.0014	2.44594	0.035071	0.107689	-4.21035
PDIA5	0.633531	4.61372	2.44548	0.0350984	0.107708	-4.26338
MCOLN3	0.799393	3.12343	2.44123	0.0353525	0.108123	-4.04415
PTPRM	0.865912	3.02653	2.441	0.0353658	0.108123	-4.01492
JUP	0.363902	8.42137	2.44063	0.0353881	0.108123	-4.87299
SLC43A1	0.741199	3.00073	2.44049	0.0353966	0.108123	-4.19836
RUFY3	0.723959	3.7293	2.43763	0.0355684	0.108464	-4.11497
KRT8	0.411741	7.84053	2.43675	0.0356213	0.108527	-4.85229
FAM76B	0.569741	4.26736	2.43438	0.0357649	0.108867	-4.3559
DLGAP4	0.588895	4.18422	2.43407	0.0357836	0.108891	-4.3834
TNKS1BP1	0.938508	3.78326	2.43337	0.035826	0.108955	-4.27578
RBCK1	0.455254	7.21351	2.43203	0.0359075	0.109143	-4.77509
TCF3	0.731123	7.91808	2.432	0.0359092	0.109143	-4.86212
AMOT	0.581044	4.11055	2.43169	0.035928	0.109168	-4.3682
CENPT	0.840494	2.47102	2.43119	0.0359587	0.109201	-4.08417
INTS13	0.823004	5.52731	2.43075	0.0359854	0.109244	-4.38729
EDEM1	0.878187	2.57108	2.43	0.0360313	0.109351	-3.95598
TMEM67	0.809342	3.3861	2.42886	0.0361007	0.109519	-4.0914
TMEM79	1.25945	2.29157	2.42615	0.0362665	0.109868	-3.911
LARP4B	0.464979	6.66035	2.42588	0.0362836	0.109887	-4.73526
FAM214B	0.712245	3.08759	2.42319	0.0364493	0.110225	-4.10755
CBL	0.722169	4.30451	2.42256	0.0364876	0.110243	-4.21631
PTPRG	0.541682	4.54223	2.42256	0.0364878	0.110243	-4.47711
MOSMO	0.523649	4.48986	2.42036	0.0366241	0.110524	-4.39754
SLC30A1	0.667147	3.80458	2.41967	0.036667	0.110588	-4.21861
C9orf72	1.13539	2.62537	2.41754	0.0367995	0.110904	-3.96297
RPL18A	0.45728	6.8372	2.41711	0.0368262	0.110936	-4.79999
HNRNPH3	1.09363	7.6442	2.41538	0.0369341	0.111196	-4.80727
HSD11B1L	0.862754	2.39719	2.41382	0.0370319	0.111424	-4.01036
PFKM	0.453907	6.10618	2.41342	0.0370567	0.111466	-4.74307
COL4A5	0.866039	2.82752	2.41135	0.0371871	0.111759	-3.95458
LTK	1.03617	2.40129	2.41075	0.0372246	0.111838	-4.07911
MAN1A2	0.394156	6.27341	2.40911	0.0373282	0.112102	-4.67535
UNC5B-AS1	1.20844	2.9814	2.40875	0.0373509	0.112102	-4.04857
SEMA6C	0.768522	2.74765	2.40849	0.0373672	0.112102	-4.23216
OLFM2	0.940098	3.52749	2.40658	0.0374883	0.1124	-3.91877
KIAA2026	0.642697	3.9	2.40543	0.0375615	0.112552	-4.23657
LAPTM4A	0.36686	9.48812	2.40139	0.0378194	0.113158	-4.98602
SLF2	0.42782	5.34252	2.40025	0.0378921	0.113342	-4.62278
PRKAG2-AS1	1.06019	2.6875	2.39942	0.0379453	0.113404	-3.94916
ABCA2	0.813294	3.90707	2.39941	0.0379463	0.113404	-4.26756
PALLD	0.428446	6.64409	2.39822	0.0380226	0.113599	-4.74886
JOSD1	0.559594	5.80301	2.39677	0.0381162	0.113719	-4.62273
POLR2M	0.48597	4.98259	2.39604	0.0381633	0.113819	-4.509
ZADH2	0.605962	4.41227	2.39555	0.038195	0.11388	-4.49506
CHM	0.802065	3.93999	2.39476	0.0382456	0.11397	-4.33845
GALNS	0.415837	5.28567	2.39246	0.0383953	0.114343	-4.67352
PTPDC1	0.93755	2.84224	2.39124	0.0384744	0.114545	-4.0326
ARHGEF5	0.529092	4.20535	2.38853	0.0386512	0.114937	-4.52695
TBC1D8	0.901254	2.57102	2.38766	0.038708	0.11502	-3.99462
DNAH14	0.58788	3.78317	2.38678	0.0387658	0.11511	-4.34425
FANCL	0.549354	6.01627	2.38608	0.0388114	0.115184	-4.70295
PBX4	0.796172	2.81821	2.38439	0.0389228	0.115475	-4.16579
FRMD5	0.5412	4.31355	2.38389	0.0389557	0.115539	-4.42395
SESTD1	0.886199	3.56303	2.38349	0.0389821	0.115584	-4.28102
GIGYF1	0.517649	4.19701	2.38298	0.0390157	0.115628	-4.47716
BCL2L13	0.518904	4.74034	2.38143	0.0391182	0.115852	-4.5295
ZNRF1	0.445867	5.04878	2.38041	0.0391857	0.115999	-4.59388
TNS4	0.557888	4.2966	2.38034	0.0391906	0.115999	-4.44838
ADORA2B	0.527969	5.10889	2.37982	0.039225	0.116067	-4.5771
SMS	0.445356	7.79812	2.37945	0.0392493	0.116105	-4.79811
SLC12A2	0.39551	6.12003	2.377	0.0394122	0.116418	-4.72558
RIPK4	0.593299	4.25404	2.37682	0.0394245	0.116421	-4.47516
FBXO32	0.82806	3.33346	2.37585	0.0394891	0.116544	-4.20436
LRP5L	0.876472	2.14757	2.37495	0.0395491	0.116687	-4.03169
NFIB	0.659465	3.86438	2.37471	0.0395652	0.116701	-4.35964
TMEM38A	0.503407	4.40883	2.37427	0.0395946	0.11672	-4.62209
HEATR6	0.445313	5.13498	2.37292	0.0396849	0.116869	-4.61103
LGALS8	0.496794	4.65612	2.37283	0.039691	0.116869	-4.54933
GNAZ	0.5424	4.50383	2.37132	0.0397928	0.117033	-4.51735
ARSA	0.86524	2.65556	2.36856	0.0399787	0.117459	-4.1661
NEK6	0.423084	6.1795	2.36668	0.0401062	0.117605	-4.76868
PKP2	0.968455	3.49528	2.36646	0.0401209	0.117605	-4.08749
SLC25A25	0.584728	4.35369	2.3628	0.0403696	0.118251	-4.58651
CAMLG	0.451915	6.18208	2.36225	0.0404077	0.118261	-4.73226
RELT	0.594506	4.52752	2.35529	0.0408852	0.119178	-4.6149
RSL24D1	0.450497	7.27293	2.35492	0.040911	0.119219	-4.8578
AASDH	0.565494	4.42528	2.35454	0.0409376	0.119263	-4.54396
SAT2	0.362828	6.5837	2.35428	0.0409556	0.119281	-4.83528
CAV2	0.439198	5.72442	2.35095	0.0411861	0.119713	-4.69181
TMBIM1	0.423885	5.66681	2.34995	0.0412561	0.119882	-4.78962
FKBP9	0.545248	4.48514	2.34946	0.04129	0.119946	-4.63276
EXT1	0.509297	4.5956	2.34789	0.0413998	0.120196	-4.60489
KDM5B	0.438072	5.26999	2.34592	0.0415381	0.120495	-4.64066
HHAT	1.19054	2.12908	2.34538	0.0415757	0.12057	-3.93137
EIF4B	0.567394	6.33061	2.3425	0.0417785	0.12102	-4.79562
FERMT2	0.686663	4.12228	2.3383	0.0420756	0.121473	-4.55189
GABPB1-AS1	0.755808	5.44033	2.3382	0.0420829	0.121473	-4.74382
SAV1	0.522202	4.89092	2.33784	0.0421085	0.121473	-4.56959
SLC3A2	0.342944	7.03308	2.3378	0.0421117	0.121473	-4.9249
CSPG4	0.528841	4.01967	2.33676	0.0421856	0.121607	-4.63907
BRAF	0.775137	3.44192	2.33549	0.042276	0.121768	-4.33431
GPBP1	0.351634	7.32487	2.32945	0.0427092	0.122771	-4.95832
SLC9A3R2	0.500971	4.35113	2.32775	0.0428319	0.122986	-4.58638
AKAP9	0.447994	5.56028	2.32588	0.0429674	0.123306	-4.70378
AP2A1	0.864096	3.2495	2.32427	0.0430844	0.123607	-4.11105
ARIH1	0.574851	6.75765	2.32197	0.0432523	0.124053	-4.94701
LGALS9	0.915683	2.49173	2.32006	0.0433918	0.124383	-4.22812
MEIS3	0.569284	4.89858	2.31856	0.0435017	0.124593	-4.64366
ERI1	0.442772	5.6982	2.3172	0.0436017	0.124809	-4.76821
GCC2	0.708083	3.57855	2.31576	0.0437079	0.125008	-4.31215
MAP3K9	0.984007	2.99191	2.31498	0.043765	0.125105	-4.22215
TNFRSF25	0.642752	3.43924	2.31496	0.0437666	0.125105	-4.42528
IGSF9	0.518361	5.07651	2.31397	0.0438398	0.125209	-4.67877
DOCK9	0.722381	3.87392	2.3136	0.0438673	0.125253	-4.44632
PLCG1	0.43652	3.98678	2.31331	0.0438889	0.125279	-4.72528
BACE1	0.814659	3.24766	2.31255	0.0439454	0.125388	-4.29399
EFNA3	0.498379	5.2262	2.31246	0.0439517	0.125388	-4.65913
DDHD1	0.878104	5.02979	2.30908	0.0442028	0.125893	-4.66326
TLE3	0.410338	5.61008	2.30861	0.0442383	0.125934	-4.86048
SYNE2	0.464996	5.69858	2.30856	0.0442419	0.125934	-4.83303
RPL31	0.410517	10.9592	2.30825	0.0442652	0.125959	-5.22316
CDK18	0.832844	2.50448	2.30811	0.0442755	0.125959	-4.13358
TTC37	0.889344	3.28292	2.30781	0.0442977	0.125987	-4.19247
PPARA	1.11072	2.42311	2.30713	0.0443484	0.126096	-4.05685
2019-03-05	0.481608	6.36452	2.30686	0.0443689	0.126119	-4.8917
MYO9B	0.436504	4.28834	2.3045	0.0445456	0.126478	-4.6862
KCTD15	0.673133	3.65147	2.30415	0.0445724	0.126478	-4.41856
AMT	0.669796	2.97992	2.29985	0.0448963	0.127006	-4.34006
TM9SF4	0.551222	5.34394	2.29973	0.0449056	0.127006	-4.79695
AVL9	0.409648	5.61136	2.29849	0.045	0.127167	-4.77679
RAPGEF5	0.754623	2.73711	2.29603	0.0451864	0.127658	-4.23644
TDP1	0.489477	4.67158	2.29337	0.0453899	0.128055	-4.75081
FBXL4	0.495343	4.76346	2.29031	0.0456246	0.128431	-4.64244
TLE2	0.435778	4.99839	2.29019	0.0456337	0.128431	-4.79914
RAB3IP	0.466239	4.73683	2.29015	0.0456365	0.128431	-4.64824
ECPAS	0.504478	6.32682	2.29015	0.0456367	0.128431	-4.88315
ZNF607	1.60968	1.42782	2.28964	0.0456764	0.128507	-3.90915
RCN1	0.432914	5.5438	2.28718	0.0458656	0.128968	-4.82893
CCDC90B	0.680848	5.97436	2.28696	0.0458831	0.128982	-4.85121
FGF19	0.563091	4.82035	2.28663	0.0459087	0.129001	-4.62979
RND3	0.763677	3.81566	2.28537	0.0460057	0.129113	-4.31603
EPC1	0.556827	4.66978	2.28512	0.0460255	0.129133	-4.668
MT-TM	0.939632	4.96205	2.28389	0.0461206	0.129328	-4.42576
MNT	0.700383	3.81811	2.28328	0.0461682	0.129416	-4.48848
PDLIM3	1.16737	2.81544	2.28307	0.0461845	0.129416	-4.07713
KCNC4	0.833251	3.43422	2.28244	0.0462339	0.129503	-4.41812
EPB41L5	0.683404	3.59469	2.28041	0.0463917	0.129802	-4.38845
RPS20P10	0.626706	3.12403	2.27465	0.0468441	0.130852	-4.65926
PRX	0.941645	2.04386	2.27177	0.0470721	0.131339	-4.26601
DNAJC27-AS1	0.63575	2.7764	2.27163	0.0470829	0.131339	-4.52078
TGFB1I1	0.582332	3.07475	2.26855	0.0473285	0.131988	-4.48083
ALS2CL	0.82788	2.54837	2.26819	0.0473564	0.131994	-4.30737
RPL13P12	0.677764	4.48819	2.26588	0.0475412	0.132309	-4.61899
TPBG	0.788948	3.9839	2.26381	0.0477077	0.132718	-4.4434
ZMIZ1	0.606083	4.40585	2.26118	0.0479188	0.133214	-4.53112
RC3H2	0.544768	6.45474	2.26082	0.0479477	0.133241	-4.99898
CFAP36	0.798038	5.25015	2.26025	0.047994	0.133272	-4.71931
AZIN2	0.605734	3.84196	2.25742	0.0482234	0.133787	-4.55265
PELI1	0.880831	3.25254	2.25407	0.0484955	0.134359	-4.16066
TRIM33	0.38882	6.06592	2.25391	0.0485087	0.134359	-4.89563
MEX3C	0.561007	5.04224	2.25256	0.0486193	0.134592	-4.62709
KIZ	0.93015	2.8387	2.25051	0.048787	0.134983	-4.24897
TPD52	0.362857	6.88649	2.2503	0.0488041	0.134994	-4.96979
LGMN	0.743345	5.15512	2.24991	0.0488365	0.135042	-4.66568
SLC37A3	0.462827	5.85151	2.24917	0.0488973	0.135141	-4.94017
CACNA2D2	0.629616	3.46865	2.24846	0.0489554	0.135215	-4.57165
LARP6	0.398752	6.12087	2.24836	0.0489638	0.135215	-4.97051
GCLC	0.397492	5.72561	2.24708	0.0490695	0.135433	-4.85606
TMEM61	0.954387	2.28731	2.24684	0.0490897	0.135452	-4.11782
HSPA13	0.494081	4.65929	2.2466	0.0491091	0.135469	-4.66446
PTPRJ	0.584323	4.5974	2.24577	0.0491777	0.135622	-4.73422
SMCO4	0.553379	4.47452	2.24364	0.0493546	0.136036	-4.66179
ZNF277	0.777333	4.1091	2.24163	0.0495213	0.136163	-4.51744
EMC1	0.43577	6.08557	2.24079	0.0495915	0.136283	-5.00892
CHMP5	0.426563	7.41879	2.23967	0.0496847	0.136455	-5.07305
NEDD4L	0.428621	6.04405	2.23746	0.0498702	0.136827	-4.99362
CXorf38	0.85678	3.02178	2.23253	0.0502848	0.137446	-4.38792
PIK3CD	0.456965	4.84768	2.23004	0.050496	0.137986	-4.86039
MTAP	0.313948	7.73557	2.2296	0.0505332	0.138051	-5.1419
GTPBP2	1.21897	2.59291	2.2273	0.050729	0.138346	-4.05477
RHOB	0.396136	6.376	2.22721	0.0507363	0.138346	-4.93415
PSAT1	0.344106	7.12004	2.22606	0.0508344	0.138571	-5.05364
MSI2	0.46539	6.99779	2.22585	0.0508527	0.138571	-5.06651
CASD1	0.79141	2.86909	2.22566	0.0508691	0.138571	-4.29873
FHIT	0.891045	2.69718	2.22498	0.0509272	0.138643	-4.20656
MEF2C	0.496148	4.60092	2.22263	0.0511283	0.139117	-4.70436
ZNF467	0.719824	3.09631	2.21838	0.0514944	0.139776	-4.35566
MT-TR	1.84426	0.73313	2.21633	0.0516725	0.140073	-3.85598
SLC25A4	0.683988	5.1597	2.21468	0.0518161	0.14035	-4.84616
SLC16A5	0.708048	3.95886	2.2142	0.0518573	0.1404	-4.6264
HERPUD2	0.632289	3.85813	2.21415	0.0518622	0.1404	-4.49317
TSC22D4	0.727464	3.84334	2.21194	0.0520544	0.140771	-4.45069
ANO1	0.435805	5.45979	2.20994	0.0522301	0.141003	-4.92252
ASIC1	0.530341	4.26785	2.20979	0.0522433	0.141003	-4.68373
NOB1	0.323577	7.72596	2.207	0.052488	0.141567	-5.1372
RPL13A	0.248603	11.3313	2.2048	0.052682	0.142015	-5.45358
UBE2B	0.555841	7.0806	2.2043	0.0527264	0.14206	-5.0958
SEMA3F	0.793336	2.93486	2.20393	0.0527596	0.142074	-4.54175
PYCR2	0.715603	7.27784	2.20366	0.0527836	0.142101	-5.15643
MSANTD2	0.905601	2.64509	2.20336	0.0528102	0.142135	-4.32313
KLF11	0.872278	2.19891	2.20311	0.0528321	0.142156	-4.21015
PCM1	0.382353	6.21991	2.2019	0.0529392	0.142369	-5.03349
PHLPP1	0.557814	3.74114	2.20163	0.0529631	0.142396	-4.62355
RFFL	0.577079	4.17054	2.20074	0.0530428	0.142573	-4.58286
ADCY3	0.807942	4.67162	2.19924	0.0531761	0.142832	-4.92459
MAP3K21	0.70122	3.7282	2.19918	0.0531815	0.142832	-4.51994
LYST	0.849409	2.27823	2.19748	0.0533331	0.143202	-4.22742
SNHG8	0.30008	8.92337	2.19641	0.0534293	0.143346	-5.30931
TRAPPC6A	0.452922	5.49237	2.19555	0.0535067	0.143479	-5.05975
FKBP15	0.755907	3.14662	2.19518	0.0535392	0.143528	-4.42908
PROSER3	0.720324	3.54862	2.19409	0.0536376	0.143716	-4.68621
KIF16B	1.08166	2.34348	2.19284	0.0537499	0.143903	-4.18464
EPN2	0.49259	5.29116	2.19062	0.0539502	0.14425	-4.88655
PDLIM1	0.465061	6.45855	2.18935	0.0540655	0.14452	-5.11443
CHST3	0.797622	2.63546	2.1891	0.054088	0.144542	-4.332
AVPI1	0.710285	2.88397	2.18853	0.0541398	0.144643	-4.39375
EPB41L2	0.754487	7.08895	2.18363	0.0545867	0.145684	-5.16083
ANG	0.754989	2.93295	2.18282	0.0546608	0.14579	-4.41851
MYSM1	0.780809	3.27329	2.18273	0.0546694	0.14579	-4.42499
SLC25A42	0.553754	3.6954	2.17953	0.054963	0.146381	-4.68873
SLC12A4	0.463412	3.71171	2.17918	0.0549949	0.146389	-4.8224
HDAC5	0.831783	3.6981	2.1772	0.0551776	0.146755	-4.59802
TFPI	0.626016	3.92506	2.17696	0.0552001	0.146755	-4.63992
MAPK11	0.463987	4.38706	2.17652	0.0552405	0.146775	-4.96559
SMYD2	0.434709	5.16728	2.17618	0.0552727	0.146822	-4.90296
TMEM245	0.481371	4.93507	2.17599	0.0552902	0.14683	-4.87293
MXRA7	0.417169	5.05977	2.17558	0.0553282	0.146892	-4.93047
MEAF6	0.619814	6.04749	2.17151	0.0557062	0.1476	-5.05479
GAN	0.489459	4.701	2.16902	0.0559391	0.148089	-4.80511
ACAD10	0.584874	3.7243	2.16815	0.0560211	0.148229	-4.71
PODXL	0.46417	6.15564	2.16738	0.0560933	0.148382	-5.11364
SLC46A3	0.742344	2.18075	2.16677	0.0561505	0.148495	-4.44917
TNKS2	0.611861	4.33847	2.16642	0.0561832	0.148543	-4.85056
FZD7	0.9498	3.13731	2.16609	0.0562143	0.148561	-4.41721
STAT3	0.520041	4.27339	2.16441	0.0563729	0.148851	-4.80581
NFE2L1	0.380606	6.33462	2.16225	0.0565772	0.149235	-5.0807
NRBP2	0.529075	3.51379	2.16185	0.056615	0.149296	-4.7175
NT5M	0.768922	2.66598	2.15921	0.0568655	0.14982	-4.51164
TPM2	0.457354	7.58563	2.15885	0.0568996	0.149853	-5.22568
CEP290	0.627738	3.53071	2.15707	0.0570694	0.150183	-4.59297
HSPA5	0.243305	10.9016	2.15566	0.0572042	0.15046	-5.53094
RPS6KA2	0.578254	3.68284	2.15456	0.0573102	0.150661	-4.70178
PTK2	0.376813	6.00283	2.15414	0.05735	0.150727	-5.06291
UNK	0.35661	5.5224	2.14791	0.0579507	0.151816	-5.07595
LONRF1	0.808578	4.6691	2.14789	0.0579529	0.151816	-4.74745
USP9X	0.453172	4.85731	2.14788	0.0579536	0.151816	-4.94233
SMIM10L2A	0.757936	3.00449	2.14523	0.0582116	0.152236	-4.54802
OS9	0.412225	5.64966	2.14418	0.0583142	0.152395	-5.02696
TRIP10	0.470475	5.14536	2.1421	0.058517	0.152847	-5.00568
ENTPD4	0.522095	4.59909	2.14183	0.0585434	0.152877	-4.78668
PARM1	0.416281	4.95815	2.14142	0.0585834	0.152942	-4.96891
RPS20P4	0.466553	0.153676	2.14102	0.0586222	0.152989	-4.82238
SHOC2	0.482638	5.61262	2.14093	0.0586314	0.152989	-5.02494
BIK	0.582761	4.98272	2.13998	0.0587246	0.153102	-4.97917
CD70	1.10655	2.34901	2.13953	0.0587687	0.153102	-4.26414
SP140L	0.565423	3.87155	2.13648	0.059069	0.153736	-4.7544
KCNJ11	0.722209	3.20823	2.13595	0.0591217	0.15377	-4.86625
ALMS1	0.536983	4.13483	2.13453	0.0592623	0.153964	-4.80611
PIK3R1	0.377382	5.63698	2.13412	0.0593026	0.154029	-5.1093
HDAC6	0.456154	4.63297	2.13361	0.0593534	0.154101	-4.96908
ADM2	0.863143	2.78576	2.13346	0.0593682	0.154101	-4.57433
LIMD2	0.714037	2.81868	2.13338	0.0593758	0.154101	-4.47659
HERC4	0.420264	5.53425	2.13252	0.0594611	0.154239	-5.1074
CREBZF	0.373827	6.35824	2.13239	0.0594744	0.154239	-5.14796
AK2	0.315749	7.3715	2.13191	0.0595218	0.154323	-5.25548
MYOF	0.474079	5.69397	2.13011	0.0597015	0.15471	-4.96733
ZKSCAN2	0.550065	3.8048	2.12685	0.060027	0.155395	-4.76313
HRH1	0.63582	3.62088	2.12464	0.0602494	0.155813	-4.69698
PLIN5	1.47833	1.62066	2.12395	0.0603192	0.15594	-4.16804
RPS15A	0.375889	8.88922	2.12384	0.0603294	0.15594	-5.40423
COL18A1	0.469858	6.16314	2.12161	0.0605545	0.156431	-5.18536
R3HDM2	0.860876	4.37901	2.12151	0.0605654	0.156431	-4.69031
PRKD3	0.766599	3.29426	2.12007	0.0607109	0.156677	-4.52914
CAMK4	1.1236	3.1913	2.11684	0.0610389	0.157185	-4.56757
ZNF862	0.560816	3.47108	2.11665	0.0610582	0.157185	-4.80081
TJAP1	0.478802	4.62625	2.11616	0.0611082	0.157274	-4.96872
ZER1	0.589422	3.12173	2.11469	0.0612582	0.157501	-4.66483
MCOLN2	0.724261	3.56141	2.11246	0.0614868	0.157929	-4.54984
ANXA5	0.509474	6.47929	2.10981	0.0617589	0.158508	-5.11228
HR	0.57224	3.94799	2.10933	0.0618092	0.158541	-4.95891
CNTNAP3	0.978842	1.97829	2.10691	0.0620592	0.159078	-4.24347
COPG2	0.398845	4.85816	2.10492	0.0622653	0.159472	-5.0414
PTCH1	0.806093	2.52841	2.10397	0.0623635	0.159577	-4.40007
ATG4D	0.519882	3.7864	2.09882	0.0629012	0.160703	-4.92185
BCL11B	0.927586	2.30878	2.0987	0.0629141	0.160703	-4.35417
LRRFIP2	0.457117	5.30112	2.0976	0.0630301	0.160878	-5.16061
AHI1	0.411391	5.26604	2.09525	0.0632769	0.161434	-5.12212
KMT5B	0.411048	5.4557	2.09507	0.0632954	0.161434	-5.10372
SERTAD3	0.688446	4.20832	2.09378	0.063432	0.161661	-4.86312
IFFO2	0.507512	4.03743	2.09273	0.0635435	0.161864	-4.97866
NKX6-1	0.695189	2.83707	2.09244	0.0635741	0.161896	-4.66221
SEZ6L2	0.567415	4.6196	2.09231	0.0635877	0.161896	-5.0125
SART1	0.577523	3.80169	2.08955	0.0638802	0.162553	-4.80394
RPS27AP12	0.824376	2.4724	2.08943	0.0638936	0.162553	-4.46492
PRKRIP1	0.469716	4.54463	2.08823	0.0640219	0.162798	-4.99581
RBM33	0.397008	5.61292	2.08742	0.0641073	0.162863	-5.14396
CBFA2T3	0.532741	4.42771	2.08741	0.0641092	0.162863	-5.02632
CCDC9	0.646885	2.72317	2.08586	0.0642744	0.163073	-4.61765
IP6K2	0.308985	7.14967	2.08467	0.0644017	0.163315	-5.34241
MACROD1	0.786984	3.69569	2.08399	0.0644755	0.163377	-4.89652
FNTA	0.371351	5.94273	2.08391	0.0644839	0.163377	-5.19813
HSP90B1	0.349992	9.62632	2.08385	0.0644904	0.163377	-5.48894
DZIP3	0.587617	4.99398	2.08326	0.0645536	0.163496	-5.08951
SGCB	0.389308	4.83254	2.08277	0.0646063	0.163581	-5.09839
ATXN7L3B	0.460015	6.36094	2.08235	0.0646515	0.163581	-5.27935
DNM2	0.460518	6.09621	2.08207	0.0646815	0.163617	-5.26816
MON2	0.602742	3.71652	2.08158	0.0647345	0.16371	-4.82565
ZFHX4	0.52434	4.08484	2.07978	0.0649283	0.16408	-4.79027
PCSK4	0.831904	1.94198	2.07725	0.0652021	0.164647	-4.55551
2019-09-07	0.464413	6.27504	2.07651	0.0652824	0.164809	-5.27937
ALKBH5	0.404077	6.62705	2.072	0.065774	0.165657	-5.24593
RNF41	0.395874	4.90215	2.0709	0.065895	0.165903	-5.10783
FAM172A	0.519199	4.51913	2.06991	0.0660037	0.166124	-4.94889
MTRF1	0.857655	2.37142	2.06725	0.0662966	0.166667	-4.50371
SPTLC2	0.293022	7.72681	2.06572	0.0664654	0.166953	-5.4169
ZNF516	0.758529	3.39944	2.06385	0.0666724	0.167363	-4.62824
SH3BP1	0.450874	5.82865	2.06357	0.0667029	0.167399	-5.19264
B4GALT1	0.370024	7.02779	2.06209	0.066867	0.167645	-5.36897
NT5E	0.611053	4.26158	2.05973	0.0671298	0.168138	-4.89924
HEATR5B	0.599482	3.60662	2.05948	0.0671578	0.168167	-4.75821
HAP1	0.655764	1.97012	2.05819	0.0673021	0.168404	-4.61974
MST1R	0.594643	3.80935	2.0564	0.0675028	0.168616	-4.90077
MAP4K5	0.410266	4.85276	2.05622	0.0675228	0.168625	-5.05182
WDR59	0.577633	4.52451	2.05605	0.0675424	0.168632	-4.97821
PPP3CC	0.855088	2.99751	2.05294	0.0678924	0.169423	-4.53152
AGO3	0.578901	4.0757	2.0518	0.0680204	0.169661	-4.86306
ASB1	0.332648	6.27687	2.0518	0.068021	0.169661	-5.33542
USP6NL	0.436551	4.39318	2.04961	0.0682688	0.170154	-5.03454
RPS27A	0.204379	13.2551	2.04859	0.0683846	0.170359	-5.81014
MADD	0.367303	4.65985	2.04729	0.0685322	0.170563	-5.20689
PLEKHG5	0.792875	3.90097	2.04666	0.0686033	0.170695	-4.82143
ARC	0.783251	3.9212	2.04593	0.068687	0.17082	-4.76244
MKLN1	0.354803	5.55442	2.04538	0.0687493	0.170933	-5.22388
RPL11	0.265028	11.0676	2.04468	0.0688299	0.171091	-5.70335
RPS19	0.208219	12.5321	2.04448	0.0688527	0.171106	-5.83754
ST3GAL5	0.859008	2.72836	2.044	0.0689073	0.171161	-4.45637
NHS	0.904669	2.80809	2.04384	0.0689252	0.171161	-4.51364
FAM219A	0.402758	4.75727	2.04257	0.0690705	0.17148	-5.15131
PRSS30P	0.688995	3.67932	2.04165	0.0691763	0.171635	-4.72889
BAZ2A	0.494076	4.86758	2.04159	0.0691835	0.171635	-5.09055
AHCYL1	0.298668	7.51618	2.04038	0.0693223	0.171812	-5.43951
GRHL1	0.494359	4.2611	2.03972	0.069399	0.171895	-4.89722
TINCR	1.07393	2.30489	2.03965	0.0694062	0.171895	-4.55484
FAM89A	0.502854	4.27528	2.0366	0.0697589	0.1726	-4.9213
DGKA	0.51236	4.49725	2.03638	0.0697844	0.172621	-5.06582
HDHD5	0.48811	6.19381	2.03495	0.0699501	0.172947	-5.30862
COCH	0.786619	2.56023	2.03445	0.0700073	0.173004	-4.53965
LPGAT1	0.496615	5.12345	2.03303	0.0701734	0.173288	-5.17112
SHROOM3	0.687919	4.43725	2.03091	0.0704204	0.173772	-4.92026
DCAF10	0.556697	4.47214	2.02912	0.0706287	0.174202	-5.05089
CITED1	0.476122	3.88897	2.02872	0.0706759	0.174234	-5.04833
TRIM4	0.50634	5.07883	2.02818	0.0707394	0.174348	-5.13417
GALNT2	0.472577	5.23979	2.02525	0.0710839	0.17493	-5.13553
CERCAM	0.707991	3.35152	2.02499	0.0711142	0.17493	-4.66638
MARCKSL1	0.333997	8.09195	2.02471	0.0711475	0.17493	-5.59735
CEP95	0.442668	5.47501	2.02384	0.0712498	0.174995	-5.21451
BMF	1.06627	1.87167	2.0224	0.07142	0.175219	-4.30621
SPIDR	0.63045	3.91934	2.0219	0.0714789	0.175321	-4.9094
FOXO3	0.603199	4.03339	2.02011	0.0716922	0.175802	-4.97453
FCHO2	0.997372	2.46884	2.01931	0.0717867	0.175865	-4.4534
RPL3P4	0.326601	7.25951	2.01698	0.0720639	0.176397	-5.4475
USP28	0.834039	2.9899	2.0169	0.0720733	0.176397	-4.49268
FKBP5	0.474184	5.63497	2.01633	0.0721423	0.176474	-5.34949
FSTL1	0.612623	4.09687	2.012	0.0726614	0.177402	-4.83501
CAMTA2	0.464112	4.88102	2.01119	0.0727585	0.177561	-5.20149
PCMTD1	0.967116	3.06243	2.00919	0.0729998	0.178022	-4.54296
ARPC1B	0.467347	7.74236	2.00897	0.0730269	0.178044	-5.53114
HOOK2	0.36795	5.70241	2.00713	0.0732486	0.178384	-5.29163
LINC01184	0.477382	4.13863	2.00587	0.0734019	0.178572	-5.00084
FKBP2	0.517571	7.45872	2.00574	0.073418	0.178572	-5.51745
BMP8B	0.676385	2.97243	2.00555	0.0734402	0.178583	-4.64014
SYCE1L	1.13946	2.4008	2.00497	0.0735118	0.178671	-4.51834
PREX1	0.670154	3.38377	2.00202	0.0738708	0.17933	-4.93341
STN1	0.445251	5.1168	2.00083	0.0740164	0.17958	-5.23633
NPHP3	1.11524	1.86706	2.00049	0.0740585	0.17958	-4.33777
ADGRA2	0.87499	2.11426	2.00027	0.0740854	0.17958	-4.58886
UBAC2	0.285442	6.86124	1.99998	0.0741198	0.17958	-5.46657
OXSM	0.465931	4.48899	1.9998	0.0741422	0.17958	-5.04169
AGO1	0.35505	4.91458	1.99974	0.0741502	0.17958	-5.23629
RBKS	0.79719	2.63306	1.99839	0.0743159	0.17981	-4.58903
ETFDH	0.715802	3.18699	1.99733	0.0744463	0.180065	-4.802
APH1B	0.652213	2.66781	1.99599	0.074611	0.180267	-4.75282
RHOV	0.449042	4.50359	1.99178	0.0751319	0.181085	-5.22341
HMGA2	0.283477	8.32272	1.9903	0.0753155	0.181281	-5.53962
RFX3	0.495591	4.3164	1.98924	0.075448	0.181557	-4.97391
ABL2	0.448525	4.27522	1.987	0.075728	0.182058	-5.11885
PRRX2	0.397797	4.93158	1.98632	0.0758121	0.182175	-5.24518
CCDC120	0.644158	3.41649	1.98298	0.0762317	0.183068	-4.76544
SEC24A	1.1376	2.47562	1.98293	0.076238	0.183068	-4.53839
TAF1	0.403658	5.9882	1.98161	0.0764047	0.183311	-5.23312
IFNGR1	1.07407	3.65032	1.98147	0.0764219	0.183311	-4.66046
MAN1A1	0.365763	6.41417	1.98127	0.0764472	0.183311	-5.34215
INO80D	0.679505	3.49768	1.98127	0.0764473	0.183311	-4.81787
LSR	0.285238	8.58881	1.97976	0.0766384	0.18364	-5.603
KLHL36	0.451105	5.8745	1.9776	0.0769124	0.18413	-5.3113
PAWR	0.360686	5.48789	1.97714	0.0769705	0.184219	-5.28083
TRAPPC2	0.606519	3.86886	1.9757	0.0771532	0.184613	-5.01601
IKBIP	0.492985	4.74954	1.97404	0.0773644	0.184988	-5.05202
APPL2	0.830774	3.71008	1.97359	0.077423	0.185067	-4.87431
RHOQ	0.539184	4.64576	1.97323	0.0774686	0.185067	-5.02941
CIR1	0.453289	5.41106	1.97109	0.0777421	0.185478	-5.28573
SIMC1	0.560957	3.77127	1.97076	0.0777849	0.185513	-4.90264
NACA3P	0.76223	6.21209	1.97013	0.0778661	0.185533	-5.35971
GID4	0.73696	3.68787	1.96934	0.0779671	0.185659	-4.85118
PACS1	0.64731	4.40004	1.96702	0.0782654	0.186038	-5.05153
TACC1	0.340504	6.05829	1.96459	0.0785804	0.186711	-5.37896
TMEM123	0.377005	6.89057	1.96423	0.0786264	0.18675	-5.42285
KMT2E	0.381164	5.41896	1.96317	0.0787641	0.186955	-5.28659
ZNF414	0.515611	4.56933	1.96241	0.0788631	0.187121	-5.27261
GOLGA4	0.427077	6.09029	1.96027	0.0791408	0.187605	-5.36326
WBP2	0.311645	6.61296	1.95945	0.0792489	0.187773	-5.44409
ACBD4	1.01702	2.23394	1.9573	0.079529	0.188339	-4.40624
LMTK3	0.484848	4.83808	1.9572	0.0795431	0.188339	-5.10576
SUDS3	0.354412	5.84703	1.95596	0.0797056	0.188548	-5.36129
SPECC1	0.639087	3.10694	1.95216	0.0802058	0.189248	-4.77805
SMG1	0.567336	4.29395	1.95054	0.0804192	0.189663	-5.08819
SKAP1	0.635822	2.98096	1.9502	0.0804645	0.189712	-4.85827
NAA25	0.462501	4.53774	1.94887	0.0806406	0.190053	-5.10367
SPRY1	1.16321	1.84831	1.94844	0.0806974	0.190099	-4.4421
RBM41	0.825668	2.84775	1.94763	0.0808059	0.190311	-4.78481
GUCY2D	0.968877	1.99967	1.94722	0.08086	0.190394	-4.78086
CDC42BPB	0.329336	5.56984	1.94663	0.0809388	0.190536	-5.40965
ACTB	0.430439	8.35418	1.94506	0.0811482	0.19094	-5.58311
PPP4R1L	0.820377	2.3311	1.94267	0.0814679	0.191426	-4.61542
FRAS1	0.632879	4.19135	1.9426	0.0814766	0.191426	-5.07581
ARVCF	0.570755	4.07775	1.93921	0.0819321	0.192207	-5.20112
PIGB	0.545563	3.51308	1.93889	0.081975	0.192263	-5.04605
HS2ST1	0.364783	5.61144	1.93738	0.0821792	0.192686	-5.38229
TMEM185B	0.643058	4.07596	1.93728	0.0821929	0.192686	-5.18281
PPP2R3A	0.767934	3.0717	1.93466	0.0825471	0.193338	-4.72546
PIGBOS1	0.850248	2.90346	1.93362	0.082688	0.193579	-4.70686
CORO2B	0.781532	2.39511	1.93242	0.0828521	0.193874	-4.77383
ARNT2	0.625962	3.34816	1.93133	0.083	0.194175	-4.89452
NPTXR	0.358675	6.4683	1.93105	0.083039	0.194222	-5.48957
UCKL1	0.861484	3.96041	1.93088	0.0830613	0.194226	-4.886
PRRC2B	0.334643	6.50088	1.9303	0.0831407	0.194281	-5.47831
RNF182	0.486944	4.22455	1.9299	0.083195	0.194364	-5.06355
PEA15	0.434389	5.69996	1.92967	0.0832269	0.194394	-5.36165
CHD7	0.391999	5.03977	1.9287	0.0833592	0.194613	-5.26781
ARFGAP3	0.757162	4.32375	1.92654	0.0836554	0.195141	-4.95397
NET1	0.857337	6.09471	1.92531	0.0838255	0.195433	-5.47027
KANK3	0.491602	3.68677	1.92481	0.0838941	0.195503	-5.12001
MARK3	0.329268	6.36838	1.92405	0.0839979	0.195656	-5.511
SMAD2	0.328107	6.51232	1.92389	0.0840203	0.195663	-5.49812
NECTIN2	0.318527	6.03297	1.92279	0.0841729	0.195884	-5.50177
2019-09-04	1.20654	1.63366	1.92199	0.084283	0.196095	-4.49746
RASA2	0.69572	3.40135	1.92008	0.0845481	0.196561	-4.71021
KDM6A	0.73894	2.58393	1.91929	0.0846566	0.196695	-4.7272
MPI	0.362852	5.01937	1.91865	0.0847454	0.196811	-5.38173
TBX19	0.525404	3.06207	1.91679	0.085005	0.197261	-5.02889
SMIM3	0.345022	6.79241	1.91578	0.0851453	0.197425	-5.53254
CGN	1.05665	3.28136	1.91504	0.0852488	0.19753	-4.78855
NIT1	0.47997	4.79674	1.91428	0.0853555	0.197732	-5.30523
APBB1	0.54414	3.20758	1.91352	0.0854626	0.197845	-5.16511
PSMA6P1	0.62101	1.20109	1.91182	0.0857011	0.198172	-4.85846
EPC2	0.529248	4.7744	1.91102	0.0858125	0.198339	-5.33143
DSTYK	0.372694	4.94997	1.90929	0.0860563	0.198802	-5.32947
B4GALNT4	0.747704	3.4136	1.90568	0.0865672	0.199615	-4.88243
RPAIN	0.394227	7.48352	1.90559	0.0865801	0.199615	-5.63461
GPR137B	0.591866	3.96845	1.90435	0.0867568	0.199882	-5.12426
BIRC6	0.438472	4.15772	1.90408	0.0867942	0.199882	-5.1664
ATP2C1	0.327376	6.11067	1.90098	0.0872359	0.200718	-5.51699
GNAS	0.572259	7.77934	1.90075	0.0872694	0.200749	-5.5656
SERGEF	0.570654	3.52065	1.89905	0.0875124	0.201217	-5.03275
KDM5A	0.387407	5.59399	1.89765	0.0877138	0.201635	-5.43601
TOM1L1	0.38553	5.22882	1.89481	0.0881217	0.202344	-5.44482
CUTALP	0.678243	3.00255	1.89432	0.0881924	0.202461	-4.9313
OCRL	0.545253	4.75984	1.89391	0.0882514	0.202505	-5.17165
OBSCN	0.621031	2.37408	1.89323	0.0883504	0.202686	-4.87652
STIM2	0.367263	6.2224	1.89293	0.0883935	0.202739	-5.53461
AGAP1	0.360808	5.16391	1.89176	0.0885621	0.203034	-5.36417
BACE2	0.324833	5.35246	1.89148	0.0886038	0.203084	-5.45083
STK24	0.256258	7.72119	1.89098	0.0886757	0.203204	-5.68801
SH3PXD2A	0.735465	2.90567	1.88956	0.0888817	0.203492	-4.78223
SNX25	0.931447	2.88631	1.88912	0.0889458	0.203548	-4.66635
SECISBP2L	0.445046	4.55534	1.88685	0.0892768	0.204259	-5.24149
WDR44	0.51022	3.8217	1.88479	0.0895774	0.204717	-5.038
ESAM	0.834105	2.77959	1.88408	0.0896813	0.204816	-4.8287
PLD1	0.702193	3.15823	1.88203	0.0899825	0.205412	-4.95167
TOB2	0.492319	5.49018	1.88076	0.0901698	0.205747	-5.49284
CPEB3	0.737619	2.26309	1.88056	0.0901993	0.205768	-4.69276
RNF130	0.468398	4.34454	1.8795	0.090355	0.206078	-5.13664
TRIM65	0.524582	4.2622	1.87703	0.090721	0.206727	-5.18777
PLAU	0.835449	4.67401	1.87574	0.0909124	0.207024	-5.04183
SLC7A8	0.546383	4.62678	1.87502	0.0910194	0.207129	-5.25597
GTF2IRD1	0.501723	4.85685	1.8745	0.0910958	0.20721	-5.36498
SCARNA18	1.50124	1.74183	1.87259	0.0913805	0.207718	-4.66455
DHRS7	0.552338	5.87179	1.87106	0.0916086	0.208051	-5.53032
NREP	0.900334	2.69683	1.87021	0.0917358	0.2082	-4.74556
SMARCC1	0.259691	8.28266	1.86954	0.0918368	0.208383	-5.78942
KRT10	0.288478	7.64856	1.86905	0.0919096	0.20845	-5.69985
LRP6	0.63334	4.01146	1.86893	0.0919278	0.20845	-5.15455
EPHB4	0.304844	6.80894	1.86843	0.0920037	0.208576	-5.63601
WLS	0.312931	5.88567	1.86751	0.0921409	0.208794	-5.53506
CPVL	0.829322	3.89112	1.86638	0.0923109	0.209117	-5.08206
SYNGR1	0.437717	4.36765	1.86546	0.0924494	0.209222	-5.36395
ZNF181	0.81813	2.5492	1.86544	0.0924531	0.209222	-4.78816
EXOC4	0.40598	4.53131	1.86354	0.0927396	0.209637	-5.39921
DENND2C	1.21995	2.25793	1.86326	0.0927828	0.209682	-4.69928
LINC00662	0.539182	4.49377	1.86069	0.0931724	0.210149	-5.36925
RPL26	0.220259	11.1068	1.85933	0.0933778	0.210472	-5.92455
MAN2C1	0.756102	2.69315	1.85867	0.0934788	0.210607	-4.9709
RGP1	0.608103	5.37082	1.85817	0.0935551	0.210732	-5.4414
TBC1D4	0.470811	5.29917	1.8579	0.0935971	0.21078	-5.42876
DNAJC4	0.55071	3.72587	1.85675	0.0937715	0.211024	-5.18182
SP1	0.518646	4.29968	1.85612	0.0938689	0.211124	-5.25263
TCF12	0.334177	5.63592	1.85545	0.0939711	0.21124	-5.4846
VAV2	0.304573	6.26136	1.85492	0.0940517	0.211312	-5.63618
C20orf96	0.398234	5.63831	1.85378	0.0942262	0.211588	-5.49017
SIPA1L1	0.422243	4.44718	1.85151	0.0945765	0.212256	-5.28286
LGALSL	0.599856	4.21382	1.85144	0.0945867	0.212256	-5.18264
SLC50A1	0.572724	4.9247	1.85002	0.094806	0.212656	-5.23054
UBR5	0.339074	5.77626	1.84692	0.0952851	0.213589	-5.52416
POLG2	0.651305	3.98317	1.84633	0.0953773	0.21372	-5.03805
ADAMTSL5	0.517904	3.90837	1.84345	0.0958241	0.214514	-5.21593
ZNF84	0.683747	2.72403	1.84244	0.0959824	0.214726	-4.88268
ADCY7	0.421785	4.28717	1.8419	0.0960668	0.214821	-5.34399
VWDE	0.965807	2.08668	1.84084	0.0962329	0.215098	-4.76298
CEP250	0.461742	4.03091	1.84036	0.0963078	0.215217	-5.26298
GOLGA5	0.472337	4.27132	1.84022	0.0963286	0.215217	-5.34937
ZBTB7B	0.749878	3.19359	1.84001	0.0963621	0.215245	-5.1175
TIAM2	1.40309	1.75765	1.83833	0.0966259	0.215786	-4.49554
TMED9	0.210184	9.73012	1.83805	0.0966691	0.215788	-5.94264
IL10RB	0.425113	4.5082	1.83765	0.0967318	0.215864	-5.30113
GRIPAP1	0.366573	6.49017	1.8373	0.0967884	0.215873	-5.63338
WIPF3	0.736411	3.25279	1.83727	0.096792	0.215873	-5.01796
ZNF2	0.701221	2.52612	1.8371	0.0968185	0.215885	-4.80265
RAPH1	0.666195	2.68245	1.83626	0.0969515	0.215992	-4.87635
TGFBR2	0.611832	3.62926	1.83588	0.0970118	0.21608	-4.9267
ZNF121	0.406747	6.21635	1.83438	0.0972484	0.216559	-5.61046
SWAP70	0.645008	3.68865	1.8334	0.0974023	0.216854	-5.03187
SMC5	0.37633	5.48824	1.8326	0.0975304	0.217092	-5.39809
ZFP64	0.372223	4.28638	1.83116	0.0977589	0.217449	-5.3683
KLHL28	0.537688	4.03691	1.8306	0.0978467	0.217558	-5.12083
ULK2	0.609826	3.41966	1.83009	0.0979278	0.217691	-5.21789
BTG3	0.303752	6.72101	1.82751	0.0983395	0.21832	-5.57767
TMEM63B	0.42731	5.13391	1.8264	0.0985163	0.21857	-5.57445
RPL10P9	0.976782	2.57567	1.82262	0.0991232	0.219581	-4.74458
CTSH	0.409745	4.13572	1.82246	0.099149	0.21959	-5.35095
RAPGEF2	0.711021	3.09933	1.82128	0.0993393	0.21991	-4.99538
RAB37	0.647239	2.72737	1.82116	0.0993583	0.21991	-5.21242
SLC9A3-AS1	0.520455	3.36474	1.81937	0.0996466	0.220328	-5.17499
[truncated: 2,622 more rows]

## Sheet: KO_up_vs_WT_q05genes
NDRG1
ANGPTL4
STC2
EGR1
DDIT4
ANKRD37
TMEM158
ADM
HILPDA
PLIN2
GDF15
JUN
P4HA1
SLC2A3
FUT11
ENO2
LOXL2
ALDOC
ERRFI1
JUNB
CYR61
DDIT3
FOSL2
PLOD2
IER2
BHLHE40
PDGFA
PLAUR
AKAP12
ELF3
HPCAL1
MT-TL1
MT2A
VEGFA
FOS
NEAT1
PIM1
FAM162A
TSC22D3
ARRDC3
COL13A1
BNIP3
HK2
MT-CO1
DKK1
PLXNA3
PDK1
FOSB
SEMA4B
SLC2A1
SERPINE1
MT-ND6
CHAC1
SESN2
IGFBP3
SERTAD2
AGPAT4
PGK1
DUSP5
WSB1
EMP1
SAT1
ALDOA
KIAA0040
PFKFB4
BCL3
LUCAT1
NR4A2
LINC00659
PDLIM5
MT1X
MT-TE
QSOX1
MXI1
MT-TP
SLC20A1
ANKZF1
GOLGA8A
TNFRSF10D
P4HA2
DUSP4
SLCO4A1
TMEM45A
MT-TF
HIVEP2
CSRNP1
ATF3
SNORA12
ERO1A
SCARNA9
CXCR4
SHC2
TNFAIP8
ACAP1
SLC45A1
AREG
SDC4
KCNN4
RIOK3
IRF2BPL
PPP1R3B
C4orf3
SEMA3A
NR1D1
IRS2
CTGF
GADD45B
NFIL3
ASNS
GPI
NAB2
ZFYVE28
TMEM59L
BNIP3L
MIDN
BCAR3
ASPH
CAPRIN2
SNORA79
FAM110C
DUSP6
ZFP36L1
PLEKHA2
PTPRH
SERPINB1
HK1
NR2F1
HES1
KRT15
APOBEC3G
LAMB2
HELZ2
IRF2BP2
SERPINE2
ISG20
EGFR
EGLN3
PPP1R15A
CAMK1D
PHLDA1
NR4A1
SH3D21
KDM3A
KLF4
MALAT1
LDHA
RIMKLA
APOBEC3D
BMP4
DCBLD1
EGR2
SCARNA13
SCARNA20
CHST15
PPFIA4
MYO1D
SERTAD1
SLC25A37
SHB
MCL1
MKNK2
GADD45A
GPRC5A
UPK1A-AS1
MAP1B
MRC2
ARL4C
MLXIPL
PMEPA1
CDKN2B
KLF6
SLC38A2
KCMF1
TNFRSF12A
DEPP1
IDS
ITGB5
INSIG2
FOXD1
SCARNA8
TUBA1A
SYT1
GDI1
ERICH2
TRIB3
AHNAK2
CPA4
SSH1
PNRC1
ZNF160
ST3GAL1
CCNI
PITPNC1
SLC7A11
BCL6
SPTSSB
EGR3
AHNAK
RNF217
SLC45A3
COL9A3
KCTD11
DUSP2
SNORA11F
GBE1
CAPN12
TLE6
LPP
ATG16L2
RRAGD
ACTG1
PPFIBP1
PRAG1
LDLR
SIAH2
KDM4B
LINC01835
MYO1E
SOWAHC
H1F0
KRT13
MXD1
OSMR
CIB1
RPL17P50
DNAJB2
SCARNA11
PIM3
DDIT4L
ELK3
IL11
EHBP1
TRNP1
ID3
BTG1
LIMCH1
GAPDHP35
NOL3
FOXC1
TRIM8
KIFC2
GOLGA8B
DGKH
AATK
NOTCH3
TINAGL1
LINC02356
TNFRSF11A
PER1
MAGI1
SLC4A7
ZNF292
GAPDH
DUSP1
PHC2
SLC9A7
HMOX1
ERMP1
ITGA2
UCA1
SNTB1
ARL8A
ASAP2
ARHGAP45
TMOD1
JDP2
MRPS6
LGALS1
SMIM14
MT-TV
PDE9A
FAM3C
HOXB9
KDM7A
RPS27AP11
PTCHD4
ID1
UACA
SMAD3
FAM107B
PAM
SKIL
ATF4
MET
WDR60
BRSK1
DENND3
NCOR2
RALGDS
RARA
SCG2
TMSB10
PAQR8
ABCC3
CHD2
SPEG
FHL2
SYT17
PLK3
ZNF337
FAM210A
EPHA2
RIC1
FAM71E1
MT-ND5
ENO3
RERE
KLF10
TTC9
ARHGAP29
CEBPB
TMCC1
MAFF
MT-RNR1
HIPK2
PEAR1
PDCD4
CDCP1
RAB6B
PDGFB
IL17RD
ZFAND5
PKD1
RYBP
KLF2
MOB3A
TTC3
ATP8B3
DST
POC1B
ANKRA2
PDE2A
EPB41L4A-AS1
EGLN1
TNFRSF1A
HSPG2
ONECUT3
SLC5A3
RGL3
PMAIP1
TNIK
HDAC7
APP
FHL1
LPIN3
SERPINA5
ANKRD12
EIF4A2
HPCAL4
SORL1
STX1A
PPP1R13L
LAT2
MT1F
NGEF
ANKRD19P
KAT6B
PTPRF
MINDY2
JARID2
EHBP1L1
INPP4B
ZBTB10
NF1
SOCS3
TMEM44
NGFR
S100A10
DLG4
WASF2
KIFC3
TMEM39B
CCNG2
PJA2
CCDC68
SLC6A6
ARFGEF3
FGFR1
MBNL2
GRB7
TNIP1
GPR107
UBE2H
ZNF770
KBTBD2
NAMPT
ARRDC4
DNTTIP1
FLNB
NPNT
ATP11A
DGKD
PAQR6
RNF215
RCOR2
GSDMB
KIAA0895L
ITPKA
NGLY1
EFR3B
OSBPL10
WASHC1
CD59
BAZ2B
MT1P3
PSAP
WDR45B
IGF2BP3
DEGS2
MMP24OS
SEC14L1
SAFB2
RUNX1
WDR66
PAPLN
KLF12
PHF10
ZKSCAN1
EHD2
GSN
ELL
FBXO42
TRIM9
TIAM1
DEPTOR
SULT4A1
PADI2
TMEM144
PATJ
ROBO3
C9orf3
ZC3H6
IRF3
DDX50
FOSL1
POM121
SEMA3B
SPHK1
YEATS2
ITGA3
LAMB3
ST6GALNAC2
SMARCA1
MT-TI
GLI2
NTN1
IRX3
ZBTB25
FAM216A
GAA
DYNC1I2
MYOM1
NBEA
SGSM2
AFF4
CLMN
KIAA1211L
KDM5C
YPEL5
LINC00963
PGM2L1
GAD1
NARF
TMTC2
ARTN
GLG1
IGF2BP2
THSD4
PBX3
F3
VSIR
GSE1
RBPJ
TESMIN
GCAT
GOLGA2
TGFA
TXNRD1
CBX4
HID1
ADAM17
GPT2
WWTR1
STK40
NKX2-1
CLIP2
CEMIP
TLNRD1
TRIB2
HIVEP3
UPP1
AK4
LRP1
ADGRG6
PARD3
TIMP2
TTLL3
CDH1
SMYD3
ACTR1B
SEL1L3
ABTB1
ARHGEF2
PLOD1
SHOX2
PFKFB3
TTC19
PAQR5
SOX4
DBP
GPR153
CLK3
LMAN1
ERN1
IZUMO4
WFDC3
SLC16A6
PLEKHA4
C2orf72
DOCK3
ATP1A1
SCX
KIAA2013
ZBTB4
PTMS
LINC00326
CD44
FTLP3
HECA
ZNF674
BFSP1
CAMK2N1
C4orf47
PLK2
RBPMS
MSANTD3
ITGB1
MBP
TRMT10B
CRIP2
GPATCH2L
KRT18
RFTN1
ANKRD10
SEC61G
ARG2
SUN1
CNTNAP3B
WNT6
FN1
AMN1
ZNF395
DCAF16
GJB3
OSGIN1
GAPDHP40
PTAFR
NOL4L
CBX7
LAMA5
CAPS2
TFE3
FAM43A
POFUT2
CHD3
CRYBB2P1
ZEB1-AS1
IER5L
ATP6V1C2
WTIP
MAPK8IP3
SCAPER
NES
FOXP1
MZF1
SEMA7A
ABI2
LNPK
RET
GRK5
SEC14L2
ZNF217
CLDN7
PTMAP5
LAMC2
2019-09-10
LRRFIP1
PDLIM2
CSPG5
MICAL1
TNFRSF21
IDH2
PCNX1
KIF5C
PTPN12
BAIAP2L1
TMC8
OLFM1
INSR
ENO1
HSD17B1
AP1S3
LMO2
PNISR
VMP1
PTPRU
SIPA1L2
LYPD3
ING1
RELB
IL27RA
SYTL3
CRELD1
ZFAND1
FYN
INPP1
SLC25A36
CLASP1
GALE
PCK2
LAMC1
PXN
RALB
TMEM59
ZNF511
COL1A1
BRSK2
RNMT
ERCC5
PLEK2
ITGA7
SNORA79B
C14orf132
ZNF143
ANKRD11
CDKN2D
SENP7
LPIN1
KRT19
TMEM74B
SBF2-AS1
PGGHG
IL4R
KMT5C
UXS1
PABPC1L
WDR54
RPL34P31
HBEGF
MAFK
MSL1
HERPUD1
SH3GLB1
ADAM9
CTDSP2
MEF2D
GIPR
CXCL8
MAFA-AS1
NEIL1
SLC35E1
WAC
IFRD1
TET1
ADAM19
TES
ANO6
TMEM189
STK17A
PHF21A
RPS18P9
FANK1
C8orf58
ZSWIM4
RSBN1
SH2D3A
KCNK6
LEMD1
WDFY1
CEBPG
TMEM263
MAFG
YY1AP1
MAP1LC3B
RAB3A
RNF165
TMC6
FBXO46
GAS5
CST6
CSRP2
CDC42EP1
GPR161
NPAS2
UGGT2
ELMSAN1
COL27A1
SERPINB9
ELL2
DARS
MOB3C
EEF2
TPT1-AS1
ATG12
NAP1L1
TICAM1
SMURF2
ELP2
RHBDF2
PAG1
CDK5RAP3
REC8
CCDC50
B4GALT6
NAT16
GAB2
FAM8A1
IMMP2L
TMEM8B
ANTXR2
CRYL1
ERCC1
MAP3K12
ARID3A
ENDOD1
TFCP2L1
SERPING1
UTRN
PFKP
C2orf70
CACNB3
YIPF3
NR2F1-AS1
ZNF496
FNBP1
ASAP1
SRGAP3
OVOL1
CFAP97
PHF3
IL1RAP
C1R
KLF7
EMID1
GJA3
GJB2
MPRIP
SYT12
MFHAS1
DNAJB9
BTNL9
CREB5
FAM227B
NR1D2
FEZ1
FEZF1-AS1
EIF3J-DT
RNF213
ELOA-AS1
S100A6
SCARNA22
SUN2
RSF1
PLEKHG1
BRWD3
GPC2
CTBS
DRAXIN
GABARAPL1
CEP70
CORO2A
ITPRIP
TOX2
GDPGP1
TIPARP
ITGA6
EPAS1
ZNF558
GLRX
CTSB
KDM6B
SETDB1
COL7A1
AP1G2
SNX9
ADSSL1
PDZD7
DENND5A
TBC1D16
TMEM42
STK39
HELZ
CASZ1
LRRC75B
RNF24
ZNF503
TMEM39A
ARHGEF3
SH3TC1
EEPD1
PRKCI
EIF1
NFATC4
ESPN
ABCA3
BAIAP3
RRAS
FCHSD1
PRSS22
TUBB2A
NUDT14
TEX19
AADAC
OPN3
NSUN5P2
SPNS2
TMEM65
TRIB1
FAM84B
FAM89B
MAOB
CDK19
ING2
MFSD10
RSPH3
ZNF469
PRKAA2
ADPRM
NEBL
VASP
PIP5KL1
VAPB
SLC17A9
PANX2
FAM102A
ZNF354A
SOX13
APLP1
PAQR7
PHC3
CDC42BPG
SLC29A4
PDGFC
C16orf58
RELA
ALDH2
NFATC2
KCNMB4
MTHFD1L
ZMYM2
RAB20
RPS2P5
STAT6
DHRS3
RPL35P2
MYO6
RLF
SNAI1
SPRY2
TSPAN14
LRP10
ZNF865
SPRYD7															Genes with significant change
SH2B3
RUNDC3B
EPS15
ANO9
WWC2
PCOLCE2
KLHL24
PPP2R5B
RETREG3
ZFYVE1
TAX1BP1
USP11
FER1L4
SLC7A1
CHRNB1
PICALM
AP2B1
ACBD3
LRP5
HBP1
CREBRF
USP34
ELFN2
RGS9
HIP1
PRKCSH
TAF1D
WNT16
CA12
ZSCAN16-AS1
ZFAND3
EPS8L1
RAC2
MACF1
FEM1C
PAN2
EEF1AKMT3
ZNF419
ZFAS1
BTBD2
AFAP1L1
CNOT6L
ARHGEF17
CD40
CLDND1
PARD6B
CD164L2
RGS10
ARHGEF9
TRPT1
CCDC18-AS1
STK32C
DYNC1H1
HIST1H2BD
ZNF264
CCNJL
NDRG4
FXYD6
VGLL4
PXDC1
ATP9A
AIP
TRAM2
PLEKHO1
SLC23A2
CDK10
AKAP13
NLRP1
ZFP14
SYDE1
RREB1
TNFSF12
STX16
RPL3
CIC
NOTUM
H6PD
CD33
LINC02609
FRK
RPS18P12
TOP2B
PRRG1
ARSK
UBXN7
ZNF16
MYRF
GALNT18
TSPAN31
SEC63
FLNA
YPEL2
RNF214
OPTN
ITGB4
LINC00511
CADM4
PPP1R26-AS1
UBALD2
SLC1A1
ZCCHC7
SPINT1
KPNA5
RNF145
MAML2
PLPP5
EPS8
GTPBP1
BICDL2
ARL5B
RAB11FIP1
UGCG
TMCC2
TMF1
DRAM2
WDR55
STK36
CTTNBP2NL
PLD3
CDK5R2
IL11RA
TTC17
KMT2C
NOP53
VCAN
LMO7
KIAA1191
TEF
SIRT5
COL6A1
PAPSS2
SPG7
KREMEN2
DIP2A
PPP2R2A
CCDC88C
MAPRE3
PELI2
ID2

## Sheet: KO_lo_vs_WT
gene	logFC	AveExpr	t	P.Value	adj.P.Val	B
HSPE1	-1.5619	7.97336	-10.9701	8.40822e-07	0.000152834	6.32923
H2AFX	-1.68463	6.13486	-10.4286	1.32941e-06	0.000199043	5.90503								Genes downregulated in NCLX KO cells (fold increase)
KPNA2	-1.5085	7.63813	-10.3434	1.4313e-06	0.0002052	5.78085
SRSF3	-1.46056	7.67153	-10.2167	1.59915e-06	0.000216339	5.67102
ATP5MC1	-1.52835	8.71892	-10.2053	1.61526e-06	0.000216339	5.56928
NDUFAF8	-1.22409	9.18742	-10.0736	1.81507e-06	0.000230944	5.42901
ACP2	-1.76597	5.18548	-9.73928	2.45449e-06	0.000274552	5.30197
KLK6	-1.70934	5.79261	-9.35967	3.49467e-06	0.000362982	4.95857
PCNA	-1.58489	6.74521	-9.20983	4.03067e-06	0.000394851	4.78703
HOXA7	-1.58112	5.84167	-9.1051	4.45846e-06	0.000416354	4.65803
UQCRQ	-1.10655	9.74898	-9.09004	4.52394e-06	0.000418629	4.42425
MCM5	-1.86175	5.41195	-8.97101	5.08008e-06	0.000449653	4.56792
PHB	-1.51715	8.04366	-8.95219	5.17462e-06	0.000452787	4.40219
ATP5MC3	-1.09002	10.0864	-8.89969	5.44873e-06	0.0004602	4.24641
GINS2	-1.39287	6.3433	-8.78224	6.12118e-06	0.000500506	4.31115
DCTPP1	-1.39353	6.95252	-8.6132	7.25301e-06	0.000563576	4.11139
GPATCH4	-1.64229	5.40157	-8.3086	9.91342e-06	0.000707621	3.87123
PCLAF	-1.23331	7.74371	-8.04404	1.30995e-05	0.000861701	3.48484
GRWD1	-1.52953	5.64478	-8.03644	1.32061e-05	0.000861701	3.5424
NUDC	-1.15214	6.93283	-7.95655	1.43864e-05	0.000900073	3.37796
EIF4G1	-1.05324	7.88849	-7.95567	1.44e-05	0.000900073	3.28115
COPS9	-1.20635	7.11716	-7.88688	1.55096e-05	0.000934153	3.29302
POLR2L	-1.26663	8.09346	-7.88135	1.56028e-05	0.000934243	3.25035
NME1	-0.976542	8.77508	-7.86505	1.58811e-05	0.000943854	3.16501
MCM2	-1.14719	7.05305	-7.86112	1.59488e-05	0.000943854	3.27671
PGP	-1.39263	5.53091	-7.84369	1.62537e-05	0.000949168	3.3638
PSMB6	-1.07481	7.57814	-7.78278	1.73698e-05	0.000982189	3.14319
NDUFB10	-1.24245	7.12876	-7.77275	1.75615e-05	0.000982189	3.17364
SAC3D1	-1.57211	6.64795	-7.76045	1.77995e-05	0.000990063	3.14471
TRAPPC2L	-1.33805	6.9579	-7.70573	1.89027e-05	0.00102605	3.07984
SRM	-1.24847	6.79625	-7.68352	1.93715e-05	0.0010339	3.0865
CENPM	-1.97631	3.91712	-7.66567	1.97574e-05	0.00104202	3.30652
STARD7	-0.951913	8.71238	-7.63771	2.03787e-05	0.00106925	2.89346
PPIF	-1.19935	6.22597	-7.56798	2.20229e-05	0.00113218	2.98447
MT-ND3	-0.950039	13.2799	-7.52682	2.30607e-05	0.00117957	2.49089
PSMC3	-1.08395	6.76884	-7.51356	2.34063e-05	0.00119126	2.86463
NUBP2	-1.27728	5.79953	-7.46472	2.47283e-05	0.00122785	2.87304
H2AFZ	-0.825164	10.9193	-7.4502	2.51369e-05	0.00124208	2.56566
EIF4G2	-0.994107	9.82437	-7.44322	2.53361e-05	0.00124587	2.61762
AMDHD2	-1.84378	4.59809	-7.42717	2.58002e-05	0.0012581	2.9733
HMGB1	-0.971234	8.9363	-7.41916	2.60351e-05	0.00126196	2.64743
MRPS34	-1.10631	6.96336	-7.38582	2.70392e-05	0.00128375	2.67837
LRR1	-1.4619	5.23988	-7.36525	2.76793e-05	0.00130439	2.85565
PSMA4	-1.07148	7.69056	-7.33687	2.859e-05	0.00134109	2.63942
CCT2	-0.959563	8.61665	-7.30092	2.97902e-05	0.00138502	2.54763
MRPL20	-1.08513	7.7022	-7.30068	2.97984e-05	0.00138502	2.5462
PSME3	-1.54694	6.48405	-7.29164	3.01088e-05	0.00138678	2.682
MRPL11	-1.26874	6.71765	-7.281	3.0479e-05	0.00139751	2.62885
GEMIN4	-1.58776	5.06706	-7.24329	3.18303e-05	0.00144	2.6887
MRPL41	-1.17745	6.29051	-7.21966	3.27102e-05	0.00146034	2.52392
MRPL52	-1.09056	6.41989	-7.15754	3.51518e-05	0.00154229	2.46561
MRPL27	-1.03303	7.66881	-7.10467	3.73863e-05	0.00160172	2.29997
MRPS12	-1.29522	6.77998	-7.0814	3.8418e-05	0.0016294	2.35155
SNHG9	-1.63335	6.1315	-7.06059	3.93671e-05	0.00166273	2.37662
COMMD5	-1.16432	5.58836	-7.03269	4.06794e-05	0.00170402	2.38226
RPA2	-1.12743	6.35373	-7.01731	4.14232e-05	0.00171401	2.31059
NOP56	-1.05314	7.14621	-6.97564	4.35133e-05	0.00175248	2.21561
NDUFB9	-0.851724	9.275	-6.97477	4.3558e-05	0.00175248	2.08166
LINC01963	-1.95839	3.32302	-6.95552	4.4563e-05	0.00178235	2.5303
NHP2	-1.01082	6.79184	-6.95386	4.46506e-05	0.00178235	2.18424
CLUH	-1.24821	7.41989	-6.92255	4.63435e-05	0.00183553	2.07365
POLR3H	-1.40676	4.79324	-6.91769	4.66119e-05	0.001839	2.33345
TFRC	-1.02639	7.43796	-6.91062	4.70062e-05	0.00184445	2.09947
VDAC3	-0.967312	7.36365	-6.90188	4.74987e-05	0.00185245	2.1003
NUP62	-1.09391	6.42147	-6.89696	4.77784e-05	0.00185418	2.15344
XRCC6	-0.911298	7.69672	-6.8947	4.79074e-05	0.00185418	2.04611
ALG1	-1.89407	3.6711	-6.87753	4.88997e-05	0.00187765	2.41664
ZWINT	-1.13435	6.44803	-6.8638	4.97099e-05	0.00188112	2.15296
QDPR	-1.21673	6.48364	-6.85768	5.00755e-05	0.00188112	2.10693
LAMTOR1	-0.973294	7.50293	-6.85743	5.00903e-05	0.00188112	2.04361
PPIH	-0.937432	7.3671	-6.85354	5.03245e-05	0.00188112	2.01307
MED31	-1.25745	5.5584	-6.83826	5.12553e-05	0.00188317	2.12535
MRFAP1	-0.893222	8.8356	-6.83061	5.17277e-05	0.00188723	1.9079
DDX23	-1.09086	5.94978	-6.8257	5.20339e-05	0.00189162	2.08064
IMP3	-0.982766	8.74523	-6.81386	5.27803e-05	0.00189841	1.8833
TFDP1	-1.44096	7.92258	-6.80782	5.31653e-05	0.00189963	1.92133
JMJD8	-1.33684	5.9065	-6.80747	5.31873e-05	0.00189963	2.06008
PRELID1	-1.25011	7.08394	-6.78751	5.44823e-05	0.00193232	1.97387
ATP5MF	-1.19223	6.99122	-6.73464	5.80803e-05	0.00202465	1.94344
GMNN	-1.65997	5.04759	-6.71032	5.98213e-05	0.00207823	2.11102
TIMM17A	-1.0853	6.5923	-6.70431	6.026e-05	0.00208383	1.90687
FOXRED2	-2.02127	3.58225	-6.69863	6.0678e-05	0.00208662	2.22394
PINX1	-1.81605	3.39159	-6.67644	6.23413e-05	0.00210821	2.18766
SRRM1	-1.06443	7.21012	-6.66209	6.3443e-05	0.00213131	1.83682
MCM4	-1.25295	6.28344	-6.65687	6.38485e-05	0.00213551	1.92447
PPIA	-0.968152	8.03174	-6.65163	6.42595e-05	0.00213757	1.74209
POLE3	-1.11767	7.61103	-6.62731	6.62015e-05	0.00218079	1.73906
GAL	-1.10242	7.10634	-6.61395	6.72959e-05	0.0022006	1.73339
CENPX	-1.07352	6.98	-6.59322	6.90321e-05	0.00224498	1.71153
ILKAP	-1.28977	6.15639	-6.58222	6.99733e-05	0.00225033	1.73229
BIRC5	-0.942591	7.58262	-6.5822	6.99748e-05	0.00225033	1.66562
IMP4	-1.03304	6.22126	-6.58097	7.00809e-05	0.00225033	1.74131
DNAJA1	-1.04084	7.68656	-6.56703	7.12954e-05	0.00228213	1.65473
AURKA	-0.998997	6.8519	-6.5592	7.19885e-05	0.00229018	1.71919
LETM1	-1.12451	6.20728	-6.55542	7.23245e-05	0.00229343	1.72824
DEF8	-1.09732	5.97432	-6.55262	7.25756e-05	0.00229425	1.72506
RFC5	-1.09581	6.37612	-6.53714	7.39777e-05	0.00231698	1.69503
PRPS1	-1.03406	6.81336	-6.53005	7.46297e-05	0.00233023	1.67384
SRSF2	-1.3511	8.12027	-6.51976	7.55875e-05	0.00235292	1.56839
MCM7	-1.24632	7.81473	-6.47797	7.96142e-05	0.00245574	1.52098
CYB561A3	-1.38181	4.60541	-6.47492	7.99177e-05	0.00245765	1.79401
ZMPSTE24	-1.25596	5.11918	-6.43559	8.39372e-05	0.00255013	1.73215
RPUSD1	-1.59687	4.39363	-6.43213	8.43011e-05	0.00255013	1.74356
DBI	-0.805126	8.4857	-6.42714	8.48287e-05	0.0025538	1.39599
HOXA9	-1.08719	6.54135	-6.42449	8.51109e-05	0.0025538	1.57399
SIVA1	-0.890915	8.46085	-6.42269	8.53022e-05	0.0025538	1.39763
TST	-1.085	5.96004	-6.41682	8.59322e-05	0.00256511	1.55355
SAE1	-0.963113	8.10108	-6.38879	8.90066e-05	0.00262608	1.40053
DDX56	-1.31679	5.12219	-6.37395	9.06828e-05	0.00265206	1.61703
KLK5	-3.76251	0.811838	-6.3704	9.10883e-05	0.00265206	1.69333
RAN	-0.754736	10.3444	-6.37015	9.1118e-05	0.00265206	1.22066
LSM4	-0.887877	8.15741	-6.36466	9.17492e-05	0.00265317	1.35344
TACC3	-1.19341	7.22858	-6.35917	9.23864e-05	0.00266403	1.43751
HDGF	-0.878236	8.33467	-6.34207	9.43996e-05	0.00270674	1.31239
FDFT1	-1.02352	6.27266	-6.3306	9.57767e-05	0.00273084	1.45604
TUFM	-0.848004	8.63522	-6.30901	9.84292e-05	0.00277538	1.20716
G3BP1	-0.865831	8.44761	-6.30336	9.91356e-05	0.00278757	1.282
DHX37	-1.32404	4.2497	-6.28862	0.000101006	0.00279852	1.53427
TMEM199	-1.17233	5.12888	-6.2886	0.000101009	0.00279852	1.50885
EMC8	-0.894478	7.35723	-6.26569	0.000103992	0.00284553	1.23949
STMN1	-0.768463	9.84397	-6.23701	0.000107862	0.00293564	1.09002
TPRG1L	-1.06054	5.99127	-6.21722	0.000110623	0.00297892	1.28271
SLC46A1	-2.09061	2.73415	-6.21071	0.000111549	0.00298803	1.64958
CAD	-1.32485	5.55666	-6.20494	0.000112375	0.00300222	1.28498
ATP6V0D1	-1.52018	4.42157	-6.20127	0.000112904	0.00300222	1.4271
MVK	-1.38409	4.26861	-6.20086	0.000112963	0.00300222	1.47996
CFL1	-0.748021	10.0504	-6.18961	0.000114604	0.00302501	1.01346
CCNB1	-0.995938	6.72555	-6.15088	0.000120448	0.00313491	1.18623
RUVBL1	-1.03479	7.08473	-6.14711	0.000121035	0.00313491	1.14771
DDX28	-1.18624	4.93546	-6.13939	0.000122244	0.00314223	1.25806
GTF3A	-1.13672	6.53079	-6.1297	0.000123781	0.00315393	1.13535
COMMD4	-1.60078	5.40255	-6.12096	0.000125185	0.0031706	1.24095
TSN	-1.14213	6.79877	-6.11725	0.000125786	0.0031756	1.16131
MRPL49	-1.31613	5.13609	-6.10979	0.000127005	0.00317755	1.30108
DPH2	-1.3802	5.00054	-6.10608	0.000127616	0.00317755	1.28243
HSD17B10	-1.2678	6.3037	-6.10571	0.000127677	0.00317755	1.11681
PSMA7	-0.854006	8.84048	-6.10068	0.00012851	0.00319049	0.98096
FPGS	-1.03384	5.26022	-6.09626	0.000129248	0.003201	1.18551
CNOT9	-0.939647	6.22234	-6.09121	0.000130094	0.00320416	1.12029
TACO1	-1.44669	5.63141	-6.09008	0.000130286	0.00320416	1.15848
PA2G4	-0.858702	8.42175	-6.08466	0.000131203	0.00321326	0.949154
PPM1G	-0.842726	7.78354	-6.07861	0.000132236	0.00321326	0.967734
LSG1	-1.00618	5.7103	-6.07659	0.000132584	0.00321326	1.14799
HSPD1	-0.912433	9.04014	-6.06454	0.000134672	0.00323912	0.917091
TMEM250	-1.4346	6.25966	-6.06294	0.000134952	0.00323912	1.01892
AURKAIP1	-0.898229	7.38007	-6.06129	0.000135242	0.00323912	0.967172
PCYT2	-1.70763	3.38545	-6.05872	0.000135694	0.00324069	1.39073
FAM111A	-1.23727	4.91072	-6.05731	0.000135944	0.00324069	1.24327
TALDO1	-0.984111	7.63517	-6.04784	0.000137627	0.00326129	0.936866
HNRNPAB	-1.02106	7.54178	-6.04705	0.000137769	0.00326129	1.01761
SLC9A3R1	-1.1463	6.15289	-6.04134	0.000138797	0.003278	1.05454
SNRNP25	-1.77089	4.23373	-6.0341	0.000140111	0.00329375	1.23734
DLD	-0.927329	6.67504	-6.00153	0.000146193	0.00341307	0.988092
RRS1	-1.17388	5.80951	-5.999	0.000146677	0.00341654	1.02425
TELO2	-1.46006	3.31454	-5.99104	0.000148214	0.00344445	1.27325
FOXRED1	-1.37853	3.92294	-5.98537	0.000149318	0.00346219	1.23035
ZNF544	-1.45274	4.04941	-5.98197	0.000149983	0.00346972	1.22992
CNDP2	-1.25678	4.85709	-5.97488	0.000151383	0.00348169	1.11177
MTHFD1	-0.985794	6.0852	-5.9741	0.000151538	0.00348169	0.998437
CLU	-1.04968	6.69908	-5.96748	0.000152859	0.00348868	0.900694
CNP	-0.900048	6.43867	-5.95989	0.000154388	0.0035157	0.885407
MRPL46	-1.16754	5.51804	-5.95398	0.000155591	0.00353519	0.994179
HNRNPM	-0.955144	9.069	-5.94954	0.000156501	0.00354793	0.73823
PSMD1	-0.911432	7.31053	-5.93382	0.00015977	0.00360598	0.852486
MINOS1	-1.63542	4.51677	-5.92716	0.000161177	0.00360992	1.24361
POP4	-1.23754	5.16149	-5.9232	0.00016202	0.00360992	1.02051
ASF1B	-1.24317	6.5433	-5.92295	0.000162072	0.00360992	0.975544
LDHB	-0.726886	9.80109	-5.91139	0.000164562	0.00362676	0.642564
TAF9B	-1.69254	3.55918	-5.90534	0.000165882	0.00362676	1.22948
FLAD1	-1.26733	5.17498	-5.90464	0.000166035	0.00362676	0.952686
CTNS	-1.84748	2.68553	-5.90133	0.000166762	0.00363485	1.21504
MRPL4	-1.15742	5.43003	-5.88527	0.000170338	0.00369696	0.932672
SFXN2	-2.59471	2.81122	-5.87858	0.000171853	0.003714	1.24477
ASNA1	-1.29505	5.09399	-5.86935	0.000173968	0.0037438	0.948292
DTYMK	-1.04168	6.18975	-5.82665	0.000184115	0.0039455	0.749964
SNU13	-0.839423	8.48602	-5.82417	0.000184724	0.00395022	0.591251
TLCD1	-1.35357	3.74901	-5.81885	0.000186035	0.00395335	0.943079
LMNB2	-0.983275	7.96143	-5.81037	0.00018815	0.00398112	0.616992
WDR5	-0.853307	6.74596	-5.80892	0.000188515	0.00398112	0.682631
TCP1	-0.932668	8.60368	-5.80183	0.000190306	0.00399407	0.60016
HSPA8	-1.31727	7.41849	-5.78837	0.000193757	0.00405812	0.620858
KBTBD6	-1.4952	4.32199	-5.78262	0.000195249	0.00406638	0.957874
FKBP4	-1.0515	7.2046	-5.78093	0.000195691	0.00406638	0.626894
ARMC6	-1.41102	3.57668	-5.78071	0.000195748	0.00406638	0.978188
CYC1	-1.01134	7.60617	-5.76984	0.000198615	0.00410081	0.547132
MRPL40	-1.1733	5.84015	-5.76371	0.000200253	0.00410298	0.681191
SCO2	-2.28082	1.76367	-5.76342	0.000200332	0.00410298	1.06543
FUS	-0.817958	8.13268	-5.76091	0.000201006	0.00410851	0.497842
ATP5F1E	-0.790122	9.00913	-5.75496	0.000202614	0.00413308	0.449188
MRPL3	-0.877852	7.51056	-5.74912	0.000204207	0.00414091	0.585306
VWA1	-1.50092	4.85886	-5.73758	0.000207395	0.00418034	0.748088
TMEM218	-1.44056	3.93044	-5.72733	0.00021027	0.00422991	0.922021
CCT5	-0.864913	8.82257	-5.72156	0.000211909	0.00425448	0.443388
CDK4	-1.2073	7.54812	-5.71909	0.000212614	0.00426023	0.494524
ITPA	-0.963167	7.14751	-5.71416	0.00021403	0.00428018	0.477841
SRSF6	-0.912299	7.87858	-5.71261	0.000214475	0.00428067	0.486898
EEF1AKNMT	-1.02853	4.8934	-5.70652	0.000216243	0.00430751	0.68656
FGFBP1	-3.1468	1.05461	-5.70096	0.000217869	0.00433142	0.936937
PSMB4	-0.836088	8.01816	-5.69677	0.000219101	0.00434743	0.457952
PSMB5	-0.765132	8.63887	-5.68677	0.000222078	0.00439793	0.370925
CBX2	-0.965589	6.00946	-5.68087	0.000223856	0.00442125	0.548274
CIAO2A	-1.25802	6.54731	-5.66584	0.000228449	0.00449294	0.569517
RBM14	-1.21021	4.33776	-5.66522	0.000228642	0.00449294	0.747087
RPS6KA4	-1.40314	3.8311	-5.65643	0.000231377	0.00452052	0.664606
UNG	-0.940391	7.05414	-5.64779	0.000234101	0.00454045	0.492426
EMG1	-0.995145	6.6148	-5.64726	0.000234269	0.00454045	0.465148
SNRPD2	-0.838972	9.06521	-5.64613	0.000234628	0.00454045	0.294061
POMP	-0.718081	9.14066	-5.61988	0.00024314	0.00466088	0.266454
CCT7	-0.882818	9.11848	-5.61832	0.000243657	0.00466126	0.250731
GOT2	-1.05997	7.26124	-5.61641	0.000244289	0.00466126	0.374657
RPUSD2	-0.986355	5.9754	-5.61567	0.000244534	0.00466126	0.450966
SLC25A19	-1.59207	4.71492	-5.60456	0.00024826	0.00471462	0.624606
COA7	-1.19782	5.21597	-5.59759	0.000250629	0.00475075	0.533989
KARS	-0.832112	7.36305	-5.57489	0.000258508	0.00486628	0.333367
ZBTB45	-1.50824	3.58703	-5.57271	0.000259279	0.00486628	0.644973
WWP2	-0.905399	5.5752	-5.55644	0.000265109	0.0049134	0.386752
CD3EAP	-1.03731	5.3033	-5.55474	0.000265729	0.0049134	0.484397
AHSA1	-0.824258	8.25693	-5.55245	0.000266562	0.00491546	0.210853
LYRM7	-1.21162	4.6278	-5.54246	0.000270233	0.00496517	0.582659
LAMP1	-0.994151	8.90358	-5.53485	0.000273068	0.00499446	0.135901
RNASEH2A	-1.03691	5.85573	-5.53423	0.0002733	0.00499446	0.373455
MKI67	-0.819005	7.40077	-5.52651	0.000276209	0.00502059	0.250536
ELAC2	-0.990699	5.9957	-5.51843	0.000279289	0.00505851	0.362839
WDR4	-1.20062	5.32171	-5.50532	0.000284366	0.00512313	0.348955
DOHH	-1.85573	3.43082	-5.50198	0.000285674	0.00513759	0.604487
NAA50	-0.877453	6.99015	-5.49829	0.000287128	0.00515463	0.278708
POP5	-1.10231	5.17069	-5.49573	0.000288143	0.00516375	0.426433
SLC2A4RG	-0.868829	7.63968	-5.48683	0.000291695	0.00518879	0.151039
EPN3	-1.08582	4.35098	-5.48585	0.000292089	0.00518879	0.425965
GMPPB	-1.21901	3.9823	-5.47961	0.000294612	0.00521539	0.476839
TIMM10	-1.24727	4.60417	-5.47259	0.000297478	0.0052388	0.440893
TRIAP1	-0.730275	7.54935	-5.46261	0.000301607	0.00529321	0.100606
COX7B	-0.848257	7.75223	-5.45845	0.000303344	0.00530539	0.138553
UBB	-0.94969	10.5481	-5.45469	0.000304924	0.00532388	-0.130382
TMEM147	-1.03044	7.8781	-5.446	0.000308611	0.00536983	0.0788425
UBE2N	-0.880316	6.81338	-5.44116	0.000310685	0.00539669	0.224324
RRM2	-0.848745	7.88392	-5.43707	0.000312452	0.00540892	0.074257
GNA12	-1.15198	5.33123	-5.43255	0.000314412	0.00543361	0.280816
TIMM23	-1.0443	5.37632	-5.43024	0.000315421	0.00544182	0.355483
NAXE	-0.834162	7.30161	-5.42586	0.000317341	0.00545645	0.0833252
GLMP	-1.07562	4.55571	-5.419	0.000320374	0.0054993	0.290533
PRDX1	-0.835613	11.5109	-5.41487	0.000322219	0.00552166	-0.174399
GFM1	-1.08962	5.48048	-5.40092	0.00032852	0.00560136	0.253401
IPO4	-1.60785	4.57042	-5.3946	0.000331423	0.00564139	0.287078
CASP2	-0.823325	6.57346	-5.38655	0.000335152	0.00566696	0.0813564
EIF3B	-0.966765	7.66433	-5.38138	0.000337573	0.00567297	0.0144609
NFS1	-1.24273	4.28366	-5.37214	0.000341949	0.00570032	0.345667
RAB5IF	-1.07144	5.36459	-5.36786	0.000343993	0.00572141	0.249264
MRPS7	-1.05433	7.21892	-5.36229	0.000346679	0.00575668	-0.0137828
NOP58	-0.827412	6.70257	-5.36069	0.000347456	0.00576018	0.076768
FAM98A	-0.940716	5.92933	-5.35676	0.000349365	0.0057735	0.136383
TFIP11	-1.25312	5.1892	-5.3567	0.000349394	0.0057735	0.136784
COX6B1	-0.807976	8.19707	-5.35129	0.000352045	0.0058043	-0.0876661
THAP7	-1.15863	4.08683	-5.3494	0.000352973	0.00580438	0.192231
CSTA	-0.950661	5.83988	-5.34564	0.000354836	0.00581949	0.127869
PSMD2	-0.784624	7.76305	-5.34524	0.000355035	0.00581949	-0.0643309
CCNE1	-1.03694	5.80377	-5.34379	0.000355754	0.00582189	0.0990221
NUDT5	-0.861295	6.79323	-5.34045	0.00035742	0.00583977	0.00561977
MTMR2	-0.872129	5.26121	-5.33655	0.000359375	0.0058623	0.101212
SDSL	-1.41878	4.09116	-5.33163	0.000361856	0.00589334	0.297345
DAG1	-0.853888	6.23403	-5.32183	0.000366855	0.00594621	-0.0132328
GINS1	-1.30858	4.75224	-5.3155	0.000370126	0.00598018	0.27506
PYM1	-0.967368	5.83811	-5.31082	0.000372564	0.00600053	-0.0159636
MRPL57	-0.844019	6.57944	-5.30058	0.000377956	0.00606817	-0.022469
FAM111B	-1.9762	3.71671	-5.28704	0.000385218	0.00614674	0.357901
PFN1	-0.70532	8.88708	-5.28695	0.000385266	0.00614674	-0.171042
TMEM109	-0.811807	6.48679	-5.28166	0.000388142	0.00618294	-0.0535375
EXOSC4	-1.14026	6.00233	-5.26639	0.000396578	0.0062976	-0.052965
SYPL1	-0.913884	6.63416	-5.25449	0.000403289	0.00638204	-0.0709597
LINC00839	-1.49278	3.44093	-5.25316	0.000404047	0.00638204	0.312514
EIF2B2	-1.10583	5.07224	-5.25253	0.000404403	0.00638204	0.0662151
SPR	-0.829829	5.66285	-5.24837	0.000406786	0.00639683	-0.0655428
FAH	-1.33845	3.97796	-5.2476	0.000407225	0.00639683	0.190448
MYBL2	-1.38532	5.48634	-5.2461	0.00040809	0.00640053	-0.00979464
TUBB4B	-0.659466	8.85471	-5.22717	0.000419158	0.00653552	-0.341593
PSMD13	-0.6832	7.91576	-5.22626	0.000419696	0.00653552	-0.28828
DHCR24	-0.79991	7.90677	-5.22591	0.000419906	0.00653552	-0.276933
FAM155B	-1.55769	3.3016	-5.22168	0.000422427	0.00655737	0.308226
TUSC2	-0.903203	6.10981	-5.22139	0.000422599	0.00655737	-0.0866611
URM1	-0.738092	6.46353	-5.21879	0.000424155	0.00656151	-0.212278
RUSC1	-0.995279	5.39746	-5.19018	0.000441717	0.00679113	-0.0938779
STOML2	-1.01085	8.31436	-5.18841	0.000442832	0.00679113	-0.338868
SRSF7	-0.765604	7.69096	-5.17888	0.000448864	0.00686013	-0.263809
PRPF4	-0.982501	4.90602	-5.17748	0.000449758	0.00686013	-0.0249194
KIF22	-1.17942	6.15155	-5.17704	0.00045004	0.00686013	-0.204953
SIGMAR1	-0.859421	6.15512	-5.17574	0.000450872	0.00686013	-0.195722
RPA1	-0.894596	7.03625	-5.17302	0.000452625	0.00687652	-0.25895
SLC25A10	-1.37075	4.99159	-5.17046	0.000454271	0.00689124	-0.114706
ICMT	-1.02941	5.92391	-5.16481	0.000457944	0.00692632	-0.160205
BYSL	-0.843544	5.8217	-5.16187	0.000459859	0.00693467	-0.187632
ILF2	-0.751819	7.31613	-5.15146	0.000466734	0.00701755	-0.296052
SLC5A6	-1.35452	5.55538	-5.14748	0.000469391	0.0070471	-0.0972554
ZNF668	-1.47235	3.25686	-5.14513	0.000470965	0.00706032	0.115014
COMMD9	-1.86159	3.66496	-5.14286	0.000472495	0.00707283	0.182041
HSPBP1	-1.22675	4.81404	-5.1416	0.000473344	0.00707514	-0.0446568
RRP1B	-0.782859	6.64524	-5.13998	0.000474435	0.00708105	-0.274163
METTL1	-1.09587	5.61121	-5.13772	0.000475969	0.00709285	-0.232011
MRPL18	-1.02387	6.20064	-5.13093	0.000480607	0.00712085	-0.201046
UROD	-0.897128	6.19683	-5.12992	0.000481299	0.00712085	-0.286057
MT-ND2	-0.712287	11.8109	-5.12581	0.00048414	0.00713405	-0.637031
AP2S1	-1.22529	7.41307	-5.12457	0.000484995	0.00713405	-0.323162
PSMF1	-0.867565	5.49739	-5.1215	0.000487132	0.00715293	-0.203906
TMEM208	-0.818461	5.85375	-5.1207	0.000487684	0.00715293	-0.265637
APEX2	-0.890148	5.47247	-5.11527	0.000491488	0.00718802	-0.276619
POLR2G	-0.961632	7.68611	-5.11273	0.000493276	0.00720221	-0.411547
TMEM126B	-1.23726	4.51383	-5.11063	0.000494765	0.00720488	0.0284885
ACTR1A	-1.16091	6.02952	-5.10793	0.000496677	0.00721233	-0.268121
NUDT1	-1.09503	4.38941	-5.10722	0.000497188	0.00721233	-0.098836
NOC2L	-1.01598	5.03958	-5.10692	0.000497402	0.00721233	-0.125475
AURKB	-1.05691	7.87948	-5.10333	0.000499962	0.00722886	-0.416097
CCDC167	-1.05084	5.04474	-5.10008	0.000502292	0.00725224	-0.135794
NOL9	-1.30076	3.40821	-5.08886	0.000510441	0.00733449	0.0281619
GPATCH3	-1.72053	3.88646	-5.08827	0.000510871	0.00733449	-0.0111115
MT-CO3	-0.519103	14.6408	-5.0859	0.00051261	0.00734909	-0.915383
EIF1AX	-1.14519	5.76296	-5.08397	0.000514032	0.00735912	-0.209219
SF1	-0.716675	7.79566	-5.08146	0.000515889	0.00736138	-0.438134
MRPL12	-2.19933	6.3462	-5.0788	0.000517864	0.00736138	-0.318568
ELP5	-0.80852	5.69366	-5.07844	0.000518135	0.00736138	-0.30316
COX8A	-0.835492	8.47773	-5.07834	0.000518208	0.00736138	-0.515938
SSBP1	-0.902642	7.09881	-5.07532	0.000520461	0.00737362	-0.371196
PPP2CA	-0.804278	7.2821	-5.07276	0.000522376	0.00738509	-0.386884
CISD1	-0.920187	5.78583	-5.07024	0.000524273	0.00740163	-0.247991
MCM6	-1.00228	5.47331	-5.06515	0.000528123	0.00743902	-0.203816
RCC1L	-0.948698	5.01629	-5.06481	0.000528383	0.00743902	-0.227569
MRPL24	-1.07386	7.21018	-5.06255	0.0005301	0.00745289	-0.457869
MCM10	-1.08092	4.90597	-5.05285	0.000537553	0.00754725	-0.143632
PARK7	-0.606921	8.99141	-5.05032	0.000539515	0.00756436	-0.597988
RFC3	-1.06351	4.90551	-5.04194	0.000546067	0.00762491	-0.177658
UQCC1	-1.0031	5.12234	-5.04042	0.000547263	0.00762641	-0.268172
CDC20	-0.871256	6.40538	-5.03759	0.000549497	0.00763643	-0.427837
TEDC1	-1.33867	4.65049	-5.03236	0.000553662	0.00766766	-0.266258
CDC25A	-0.992981	4.76448	-5.02961	0.000555863	0.00767863	-0.269406
CTU2	-0.905516	5.02978	-5.02814	0.00055704	0.00767863	-0.303465
PUSL1	-1.78826	2.56566	-5.02687	0.000558068	0.00767863	0.0736748
C1orf122	-0.886456	5.99344	-5.02668	0.000558215	0.00767863	-0.419936
CIAPIN1	-1.07239	5.12761	-5.02667	0.000558226	0.00767863	-0.275925
SUMO3	-0.851915	7.15582	-5.02437	0.000560083	0.00769377	-0.486858
ADORA1	-2.23552	2.52021	-5.01956	0.00056399	0.00773699	0.0480929
VPS33A	-1.12439	4.53456	-5.01743	0.000565726	0.00775037	-0.200135
POLR2E	-0.741165	8.7891	-5.01236	0.000569886	0.00777355	-0.614371
MANEAL	-1.19405	3.70973	-5.01165	0.000570473	0.00777355	-0.123853
ATP5PB	-1.03614	7.18102	-5.00912	0.000572556	0.007786	-0.493105
MIR200CHG	-1.2236	3.13726	-5.0034	0.000577315	0.00782557	-0.139844
GNPDA1	-0.819753	7.66634	-5.00242	0.000578134	0.00782557	-0.529138
CPSF6	-0.952396	5.68753	-4.99986	0.000580282	0.00784421	-0.333111
EEF2KMT	-1.53405	2.63172	-4.99337	0.00058576	0.00788474	-0.0110453
UMPS	-0.812239	6.09086	-4.99265	0.000586369	0.00788474	-0.416016
SNRPB	-0.995948	8.20454	-4.99179	0.000587101	0.00788474	-0.584635
TXNL4A	-0.710999	7.66497	-4.9886	0.000589821	0.00791013	-0.582937
POLDIP2	-0.843279	5.84479	-4.98747	0.000590785	0.00791264	-0.465542
PUS1	-0.961844	5.47365	-4.98557	0.000592414	0.00792402	-0.384709
SRSF8	-0.985511	5.56413	-4.98414	0.000593648	0.00793011	-0.318842
CENPB	-1.22062	5.40198	-4.9806	0.000596699	0.00795617	-0.42374
PARPBP	-1.02411	4.66008	-4.98007	0.000597162	0.00795617	-0.282836
UTP15	-1.17156	4.60966	-4.97674	0.000600046	0.00798415	-0.267539
MRPL37	-0.830992	6.59827	-4.97575	0.000600911	0.00798522	-0.556061
RUVBL2	-0.731559	6.56801	-4.96907	0.000606768	0.00802116	-0.545826
NAA38	-1.05132	7.5655	-4.95641	0.000618028	0.00813157	-0.652239
LSM3	-0.832539	6.61922	-4.95609	0.000618316	0.00813157	-0.513827
TIPIN	-1.43784	3.82394	-4.94576	0.000627674	0.00823336	-0.117848
GINS3	-1.0917	4.45082	-4.94469	0.000628648	0.00823554	-0.285478
NCLN	-0.88999	6.75749	-4.94097	0.000632062	0.00826961	-0.623644
NOL11	-0.736222	7.06232	-4.92544	0.000646532	0.00843725	-0.608932
FAAP100	-1.03379	4.87732	-4.91902	0.00065261	0.00848393	-0.455374
SPHK2	-1.33698	3.53694	-4.91755	0.000654012	0.00849131	-0.265374
SLC27A5	-1.07878	4.14383	-4.91209	0.000659241	0.00854056	-0.330076
DHX30	-0.834683	6.61843	-4.90441	0.000666683	0.00861188	-0.633814
YWHAB	-0.632308	8.87495	-4.90084	0.000670166	0.00863496	-0.772798
PSMD14	-0.758451	6.80559	-4.89832	0.000672642	0.00865591	-0.626116
TSR3	-0.773343	5.86626	-4.89727	0.000673679	0.0086583	-0.64641
DNAJC9	-0.8944	5.46196	-4.89594	0.000674981	0.0086641	-0.522971
MRPS18C	-0.877132	6.15964	-4.89498	0.000675938	0.00866545	-0.581799
EDF1	-0.680258	7.64256	-4.89408	0.000676821	0.00866587	-0.758919
POLR1A	-0.990762	4.73908	-4.88673	0.000684144	0.00871577	-0.436123
CBX3	-0.790757	9.80633	-4.88054	0.000690372	0.00876904	-0.890784
PNO1	-1.43748	4.68606	-4.87801	0.000692934	0.00876904	-0.289969
CTPS1	-0.920303	5.56175	-4.87801	0.000692936	0.00876904	-0.548788
PSMA2	-1.0959	6.0122	-4.87779	0.000693161	0.00876904	-0.49886
UTP11	-0.9034	5.67617	-4.87745	0.000693502	0.00876904	-0.511077
SFPQ	-0.751008	8.31501	-4.87661	0.000694355	0.00876904	-0.823671
ANAPC7	-0.973415	5.18208	-4.87112	0.000699962	0.00880124	-0.525029
MRPL15	-0.778531	6.31142	-4.87089	0.000700202	0.00880124	-0.664344
ASRGL1	-0.874247	5.82775	-4.86765	0.000703532	0.0088265	-0.61521
TOMM40	-0.978204	5.28274	-4.86709	0.000704108	0.0088265	-0.457177
MRPS23	-0.791792	6.6855	-4.85935	0.000712153	0.00890076	-0.690997
MAX	-0.858656	7.56262	-4.85708	0.000714532	0.00890076	-0.788721
VMA21	-0.636551	7.80619	-4.85637	0.000715279	0.00890076	-0.839313
ANAPC13	-1.10125	4.92976	-4.85044	0.000721526	0.0089457	-0.434769
C17orf97	-1.68183	2.62255	-4.84462	0.000727729	0.00898975	-0.16303
ABCC2	-2.37962	2.16815	-4.84236	0.000730144	0.00900865	-0.113101
TRA2A	-0.651864	8.38741	-4.84082	0.000731805	0.00901822	-0.858215
NCL	-0.609469	9.30724	-4.8352	0.000737873	0.00907103	-0.912504
DNAJB6	-0.832825	6.0753	-4.83424	0.00073892	0.00907294	-0.702813
SNRPE	-0.735803	7.70104	-4.83155	0.000741847	0.00909721	-0.759852
TRAPPC3	-0.735083	7.02255	-4.83041	0.000743094	0.00909721	-0.806835
MOK	-1.16031	4.09885	-4.82997	0.000743577	0.00909721	-0.524301
CYSRT1	-2.07457	2.6979	-4.82364	0.000750542	0.00916039	-0.280362
HNRNPH2	-0.799277	6.78588	-4.82221	0.000752119	0.00916864	-0.665284
ALDH9A1	-0.758499	5.82528	-4.81998	0.000754594	0.00917684	-0.730976
HEYL	-1.43745	3.29716	-4.8145	0.000760711	0.00921819	-0.323976
ALG5	-0.939617	6.1703	-4.8134	0.000761948	0.0092221	-0.731356
RNF26	-0.889933	5.30557	-4.8126	0.000762846	0.0092221	-0.649589
TIMM8B	-0.849952	6.76772	-4.80786	0.000768196	0.00926412	-0.776043
UQCC3	-0.949428	6.1475	-4.80537	0.000771019	0.00927126	-0.758523
CCDC51	-1.00269	5.13044	-4.80498	0.000771466	0.00927126	-0.621441
OAS3	-1.53	3.97034	-4.79414	0.000783915	0.00939867	-0.365133
NDUFAB1	-0.723558	8.26003	-4.79298	0.000785257	0.00940368	-0.890003
GPS1	-1.22338	6.1286	-4.79049	0.000788154	0.00942728	-0.770912
POC1A	-1.00412	6.00045	-4.78503	0.000794533	0.0094813	-0.797404
SAPCD2	-0.940494	5.23672	-4.78325	0.000796634	0.00949524	-0.613639
ATOX1	-0.974478	5.80249	-4.78212	0.000797957	0.00949575	-0.7452
CCDC57	-1.21259	5.70573	-4.781	0.000799278	0.00949575	-0.807362
TTF2	-1.25993	4.31302	-4.77624	0.000804934	0.00954945	-0.462184
LAD1	-1.25213	5.27196	-4.77186	0.00081017	0.00960037	-0.668131
TIMM13	-0.855512	7.80854	-4.76613	0.000817063	0.0096708	-0.997331
MRTO4	-1.02093	5.42308	-4.76069	0.00082368	0.0097265	-0.722237
RBM38	-0.925315	5.86111	-4.75944	0.000825206	0.00973323	-0.859635
NTHL1	-1.22405	4.62641	-4.75422	0.00083162	0.00978847	-0.666619
RRP36	-1.10837	5.57935	-4.7459	0.000841944	0.00989625	-0.76068
CASTOR3	-1.41679	3.61447	-4.74246	0.000846255	0.009924	-0.461328
SKP2	-1.44631	4.12705	-4.73966	0.000849781	0.00995388	-0.517178
YDJC	-0.847805	6.36494	-4.738	0.000851868	0.00996685	-0.912288
DHCR7	-0.903593	4.93138	-4.73065	0.000861219	0.0100532	-0.690186
HIF1A	-1.03539	6.00584	-4.72629	0.000866829	0.0100955	-0.747931
DCXR	-0.762399	6.85104	-4.72514	0.000868305	0.0101011	-0.950587
GEMIN6	-0.986122	4.76237	-4.72	0.000874974	0.0101655	-0.66663
STK11	-1.06633	4.20614	-4.71933	0.000875841	0.0101655	-0.665938
CDCA5	-0.953169	5.07326	-4.71525	0.000881179	0.0102042	-0.76045
ORC5	-1.2526	4.26896	-4.70907	0.000889322	0.010265	-0.607335
FIZ1	-1.00897	4.6247	-4.70889	0.000889566	0.010265	-0.791445
TXN2	-0.786908	6.77268	-4.70661	0.000892581	0.010265	-0.969817
PSKH1	-1.10244	5.19892	-4.70089	0.000900225	0.0103075	-0.866005
NLRC5	-2.2021	2.44537	-4.70005	0.000901357	0.0103089	-0.383649
NSMCE2	-0.952845	5.95874	-4.68389	0.00092335	0.0104883	-0.922847
CLSPN	-1.35097	4.04652	-4.68323	0.000924259	0.0104883	-0.588588
COX4I1	-0.621198	9.61667	-4.67833	0.000931038	0.01053	-1.20974
PRMT5	-0.748409	7.13857	-4.67134	0.000940815	0.0106288	-1.0206
CARS2	-1.00065	4.37291	-4.67053	0.000941957	0.0106299	-0.77933
ORMDL2	-0.979097	4.9486	-4.66719	0.000946675	0.010659	-0.771899
NDUFA2	-0.702162	7.24165	-4.66714	0.000946735	0.010659	-1.04776
GLA	-1.17523	3.89495	-4.66648	0.000947672	0.010659	-0.686268
ERVK3-1	-1.18253	3.76	-4.66163	0.000954578	0.0106776	-0.595617
SLC19A1	-1.09449	5.06637	-4.65816	0.000959548	0.0106863	-0.879178
TTK	-0.994765	4.86592	-4.65602	0.000962621	0.0107088	-0.728104
EIF4E2	-0.674376	6.73278	-4.65452	0.00096479	0.0107212	-1.04682
TRUB2	-1.64706	3.75266	-4.64783	0.0009745	0.0108055	-0.563328
TCTN3	-1.01799	4.87173	-4.64621	0.000976866	0.0108134	-0.797872
DYNLL2	-0.650751	8.23958	-4.64513	0.000978446	0.0108139	-1.15613
BRMS1	-1.55346	4.02428	-4.63563	0.000992486	0.010929	-0.748085
MRPL14	-0.740315	6.65699	-4.63518	0.000993152	0.010929	-1.07744
CYB5R2	-1.18826	4.42119	-4.63377	0.000995248	0.010932	-0.793556
RPS19BP1	-0.680514	7.15875	-4.63255	0.000997074	0.0109367	-1.14664
NDUFB8	-0.874927	8.16661	-4.63052	0.00100012	0.0109481	-1.17251
GAMT	-0.867054	5.15089	-4.63042	0.00100027	0.0109481	-0.95289
SSTR5-AS1	-1.84389	3.41749	-4.62944	0.00100174	0.010949	-0.588873
PRR34-AS1	-1.01581	5.17437	-4.62893	0.00100251	0.010949	-0.917615
CYCS	-0.726349	7.97936	-4.62669	0.00100589	0.0109593	-1.1177
LAS1L	-0.829439	5.23526	-4.62606	0.00100684	0.0109593	-0.933284
BCS1L	-1.1062	3.75186	-4.62591	0.00100707	0.0109593	-0.677234
VPS29	-0.788948	6.05651	-4.62413	0.00100975	0.0109593	-0.9572
KLK10	-1.11482	5.23683	-4.62355	0.00101063	0.0109593	-0.910446
ERCC2	-1.15953	4.27705	-4.62244	0.00101232	0.0109593	-0.869748
ATAD3A	-1.14792	5.57215	-4.6219	0.00101314	0.0109593	-1.00286
EIF3K	-0.606597	8.60829	-4.62002	0.00101601	0.0109672	-1.2455
COPS6	-0.717963	6.49926	-4.61804	0.00101903	0.0109881	-1.06029
NDC1	-0.73451	6.82939	-4.61664	0.00102118	0.0109996	-1.06171
MCRIP2	-1.09219	4.23391	-4.61578	0.00102251	0.0110022	-0.778521
AIFM1	-0.95927	5.67191	-4.61468	0.0010242	0.0110087	-0.981782
DEGS1	-1.45641	3.08702	-4.6093	0.00103251	0.0110864	-0.552752
HSPH1	-0.864622	7.22535	-4.60503	0.00103916	0.0111343	-1.13931
TPCN2	-1.50769	3.37139	-4.60433	0.00104025	0.0111343	-0.641453
EIF6	-0.83832	7.04742	-4.5996	0.00104768	0.0111668	-1.159
ATAD3B	-1.89628	4.00164	-4.59581	0.00105368	0.011219	-0.83824
HPS6	-0.898253	5.19638	-4.59397	0.0010566	0.0112303	-0.975325
NDUFA9	-1.19055	6.09565	-4.59375	0.00105694	0.0112303	-1.03195
KLK7	-1.18274	4.76032	-4.58624	0.00106897	0.0113373	-0.823975
PGAM5	-1.07455	5.51561	-4.58504	0.0010709	0.0113373	-1.00037
ERCC6L	-1.6198	3.17565	-4.58502	0.00107094	0.0113373	-0.595863
EIF5A	-0.774618	6.39294	-4.5847	0.00107146	0.0113373	-1.10555
NSDHL	-1.31693	4.6712	-4.58261	0.00107483	0.0113493	-0.916091
TK1	-0.943064	7.35909	-4.58158	0.0010765	0.0113551	-1.20053
DHRS1	-0.884209	6.68479	-4.57619	0.00108529	0.0114058	-1.14687
UPF1	-0.812949	6.14727	-4.57589	0.00108578	0.0114058	-1.117
TATDN2	-1.09022	5.56262	-4.5697	0.00109596	0.0114736	-1.05995
CCT3	-0.608909	8.95358	-4.56907	0.00109702	0.0114736	-1.31596
SDF2L1	-0.89796	7.05899	-4.56567	0.00110265	0.0115117	-1.18564
PNP	-0.920021	5.52204	-4.56468	0.0011043	0.0115171	-1.03732
DANCR	-0.941977	5.87309	-4.55373	0.00112273	0.0116615	-1.11347
TRMT61A	-1.53124	3.37383	-4.55279	0.00112432	0.0116661	-0.741498
GLRX5	-0.671909	7.2061	-4.55185	0.00112592	0.0116708	-1.19996
SRA1	-0.894995	4.7443	-4.54923	0.0011304	0.0117025	-0.969856
SRP14	-0.683802	8.75811	-4.54871	0.00113127	0.0117025	-1.31198
IPO9	-0.915411	5.23841	-4.54736	0.00113358	0.0117026	-0.999566
FDXR	-0.717773	7.16023	-4.54631	0.0011354	0.0117028	-1.26878
CALM1	-0.609909	8.16748	-4.54368	0.00113991	0.0117204	-1.31538
FH	-1.26731	4.692	-4.54182	0.00114312	0.0117415	-0.773926
HUS1	-1.24616	3.71682	-4.53079	0.00116238	0.011885	-0.820026
SLC25A3	-0.634634	8.68975	-4.53048	0.00116293	0.011885	-1.35261
UQCRFS1	-0.768109	6.12205	-4.52777	0.0011677	0.0119155	-1.17521
C19orf47	-1.03513	4.8842	-4.52651	0.00116993	0.0119155	-1.06846
NDUFS1	-1.01715	5.21318	-4.52606	0.00117075	0.0119155	-0.968357
ZNF587B	-1.82249	2.45408	-4.52497	0.00117268	0.0119155	-0.592674
HSPA4	-0.624398	7.61701	-4.52326	0.00117571	0.0119318	-1.30474
BUB3	-0.747773	8.2889	-4.52002	0.0011815	0.0119786	-1.34977
FARSA	-1.01374	6.75078	-4.51701	0.00118691	0.0119976	-1.1913
TRIM14	-1.26374	3.4959	-4.51275	0.0011946	0.0120513	-0.760679
EIF3G	-0.764129	6.74207	-4.51208	0.00119582	0.0120518	-1.28613
TPX2	-1.01075	7.26639	-4.50901	0.00120141	0.0120961	-1.31627
PEX26	-0.72888	5.83506	-4.50695	0.00120517	0.012122	-1.21184
HSP90AB1	-0.523038	12.159	-4.50148	0.00121521	0.0121873	-1.59404
MCAT	-1.52303	3.83468	-4.49787	0.0012219	0.0122058	-0.822343
FUBP1	-0.657612	7.33693	-4.49575	0.00122584	0.0122332	-1.29161
PSMA5	-1.04634	5.23425	-4.4941	0.00122891	0.0122482	-0.973204
ANP32B	-0.635736	8.10842	-4.49173	0.00123335	0.0122482	-1.36266
SEC61A1	-1.02587	7.27629	-4.49044	0.00123577	0.0122602	-1.37528
DNAAF3	-1.28138	4.04041	-4.4883	0.00123981	0.0122882	-0.931197
PSMG3	-0.652327	8.35629	-4.47716	0.00126099	0.0124256	-1.45202
ACOT7	-0.796296	5.38201	-4.47417	0.00126676	0.0124612	-1.1886
C19orf70	-1.40365	5.41586	-4.47345	0.00126815	0.0124612	-1.18401
ABCF2	-0.751374	5.84835	-4.47338	0.00126828	0.0124612	-1.20756
MCM3	-0.856229	7.90848	-4.47135	0.0012722	0.0124877	-1.41394
HMBS	-1.02413	5.22833	-4.46599	0.00128264	0.012576	-1.18667
WDR77	-1.21131	4.01207	-4.46546	0.00128367	0.012576	-0.917957
TRAP1	-0.780926	7.49202	-4.46124	0.00129196	0.0126208	-1.39374
TRPM2	-1.08489	4.40526	-4.45595	0.00130242	0.0126864	-1.13633
RANBP1	-0.876943	6.33705	-4.45405	0.0013062	0.0127111	-1.18667
ARFGAP2	-1.07171	4.0677	-4.45221	0.00130987	0.0127347	-1.00214
SUPT4H1	-0.793598	8.65256	-4.45059	0.00131311	0.0127539	-1.49093
CHKB-DT	-1.39925	2.61768	-4.44777	0.00131878	0.0127952	-0.802687
KLHDC4	-0.917202	5.99389	-4.44448	0.00132541	0.0128367	-1.32971
ITGAE	-0.854218	5.22749	-4.44254	0.00132935	0.0128626	-1.18617
GPAM	-1.27269	4.5889	-4.43909	0.00133638	0.0129184	-1.00477
CHMP1A	-0.632585	6.95041	-4.43221	0.0013505	0.0130178	-1.45022
FDXACB1	-2.13085	1.71958	-4.42317	0.00136931	0.0131617	-0.692186
PTCD1	-1.13669	3.70818	-4.41621	0.00138397	0.0132769	-0.973989
KAT14	-0.983604	4.12605	-4.41562	0.00138521	0.0132769	-1.06562
UPF3B	-0.950182	5.19484	-4.40775	0.00140202	0.0133904	-1.21783
RBM8A	-0.613546	7.92689	-4.40726	0.00140305	0.0133904	-1.50409
C8orf33	-0.952833	6.08324	-4.40699	0.00140364	0.0133904	-1.35459
RNF34	-0.78069	5.56983	-4.39653	0.00142632	0.0135788	-1.2706
NDUFC2	-1.11621	6.49402	-4.39439	0.00143102	0.0135892	-1.30719
ELFN1-AS1	-1.2548	4.35804	-4.39053	0.00143953	0.0136434	-1.18228
TSR2	-0.881915	4.8744	-4.38717	0.00144695	0.0136882	-1.21361
MRPL55	-0.858644	5.26304	-4.38572	0.00145019	0.0137061	-1.32983
HINT2	-0.732053	5.75338	-4.38407	0.00145387	0.0137281	-1.41407
HSP90AA1	-0.510157	12.0297	-4.38078	0.00146124	0.0137849	-1.81666
BAG1	-1.10344	5.64497	-4.37849	0.00146638	0.0138206	-1.32906
TMEM97	-1.13739	4.99203	-4.3769	0.00146997	0.0138239	-1.20278
LRRC59	-0.807771	6.1686	-4.37538	0.0014734	0.0138239	-1.42055
ECHS1	-0.912477	6.94828	-4.37379	0.001477	0.0138239	-1.4744
UBAP2L	-0.784644	5.79067	-4.37311	0.00147855	0.0138239	-1.36887
MAEA	-0.960331	5.97429	-4.37171	0.00148174	0.0138373	-1.35543
WDR34	-1.32719	6.31924	-4.36773	0.00149083	0.0138966	-1.4362
C12orf43	-1.47856	3.26045	-4.36315	0.00150136	0.0139565	-1.00195
ISG15	-1.13666	6.70045	-4.35879	0.00151148	0.014025	-1.52037
ATP5MG	-0.466364	10.5683	-4.35558	0.00151897	0.0140688	-1.79573
DDX54	-0.702857	6.74732	-4.35478	0.00152084	0.0140733	-1.5031
SNAPC5	-0.939291	4.32621	-4.35288	0.00152528	0.0140999	-1.18136
NIPA2	-0.845824	5.20858	-4.35026	0.00153146	0.0141202	-1.28184
RPS6KA1	-0.908939	5.29351	-4.34879	0.00153492	0.0141338	-1.42734
PSMB1	-0.512579	9.98956	-4.34846	0.00153571	0.0141338	-1.85681
NAA10	-0.727222	5.43841	-4.34767	0.00153758	0.0141383	-1.44494
MBD3	-1.27404	5.08182	-4.34598	0.00154158	0.0141622	-1.36453
SNF8	-0.626059	6.92801	-4.34236	0.0015502	0.0142285	-1.56922
PTDSS1	-0.734382	6.74849	-4.34095	0.00155358	0.0142343	-1.54671
LSM7	-1.10677	6.92798	-4.33502	0.00156785	0.014326	-1.55403
ZNF593	-0.702319	6.17855	-4.33074	0.00157825	0.014408	-1.54183
CREB3	-0.878796	5.18035	-4.32626	0.0015892	0.014495	-1.43285
HELLS	-0.72837	6.38337	-4.32347	0.00159604	0.0145444	-1.51009
MRPS26	-0.862161	6.25443	-4.31811	0.0016093	0.0146259	-1.51562
FAM136A	-0.78936	5.36924	-4.31754	0.00161073	0.0146259	-1.38274
RRM1	-0.670836	7.38204	-4.31654	0.00161321	0.0146353	-1.61468
PGD	-0.897517	6.18595	-4.31592	0.00161476	0.0146364	-1.51424
UBL4A	-0.813482	5.36202	-4.31304	0.00162196	0.0146885	-1.41215
MFSD13A	-1.0386	4.74585	-4.31219	0.00162409	0.0146947	-1.29096
CCDC137	-1.10083	5.23081	-4.3089	0.00163238	0.0147436	-1.39824
MRPL35	-0.931937	5.60388	-4.3032	0.00164684	0.0148347	-1.4938
MRPL28	-1.51099	4.42581	-4.29965	0.00165589	0.0149008	-1.34107
TMPO	-0.639768	7.81215	-4.29448	0.00166921	0.0149699	-1.64754
OGFOD1	-0.952804	4.69235	-4.29318	0.00167256	0.0149773	-1.38167
WRAP53	-1.38522	3.28692	-4.29302	0.00167297	0.0149773	-1.25926
UFD1	-0.764897	6.69635	-4.29152	0.00167686	0.0149989	-1.56803
BZW2	-0.768559	5.71194	-4.29011	0.00168054	0.0150054	-1.43219
GINS4	-1.09069	3.53312	-4.28743	0.00168751	0.0150545	-1.20102
NDUFS7	-0.885992	4.9356	-4.28284	0.00169955	0.0151334	-1.48757
FAM83D	-1.1217	5.96962	-4.28236	0.00170082	0.0151334	-1.41017
AMD1	-0.708279	6.54884	-4.28055	0.00170561	0.0151628	-1.57309
OAZ1	-0.531396	9.87882	-4.27874	0.00171041	0.0151789	-1.85118
SSNA1	-0.817622	5.62931	-4.27111	0.00173076	0.0153328	-1.59523
PHB2	-0.946462	9.5445	-4.26788	0.00173945	0.0153964	-1.85736
MIEF1	-0.715852	5.95739	-4.26491	0.00174749	0.0154541	-1.60581
NRIP1	-1.17073	3.69726	-4.25153	0.00178418	0.015724	-1.20169
FUBP3	-0.786583	6.18188	-4.25029	0.00178762	0.0157406	-1.58791
ANAPC11	-0.552344	8.04598	-4.24902	0.00179116	0.0157582	-1.80683
HYLS1	-1.30691	4.09334	-4.24753	0.00179529	0.0157808	-1.17729
DDIAS	-1.2719	3.39629	-4.24312	0.00180766	0.0158702	-1.13735
EIF5B	-0.550658	9.26015	-4.24198	0.00181085	0.0158702	-1.8669
GTF3C4	-0.789337	5.71282	-4.24186	0.00181119	0.0158702	-1.53933
TRAPPC4	-0.747532	6.84733	-4.24082	0.00181412	0.0158702	-1.67969
NDUFS6	-0.610196	7.92642	-4.24058	0.0018148	0.0158702	-1.81793
SNRPC	-0.643453	7.57757	-4.23546	0.00182932	0.0159393	-1.76242
NFKBIB	-1.01954	4.94867	-4.23503	0.00183053	0.0159393	-1.44166
HDDC3	-0.975425	4.98552	-4.23091	0.00184232	0.0160145	-1.49089
SNHG16	-0.540394	8.53649	-4.2303	0.00184406	0.016016	-1.84621
NUP93	-0.779101	7.99316	-4.22191	0.00186833	0.0161566	-1.80954
ATP5PF	-0.592238	7.96955	-4.21985	0.00187434	0.0161566	-1.79936
RNF185	-2.0291	2.38428	-4.21948	0.00187542	0.0161566	-1.06352
KEAP1	-0.702655	6.38831	-4.21922	0.00187617	0.0161566	-1.72277
RIOX1	-1.60196	3.30653	-4.21901	0.00187679	0.0161566	-1.22499
COA3	-0.832595	5.31289	-4.21653	0.00188406	0.0161566	-1.55595
MON1A	-1.43165	2.37031	-4.21443	0.00189024	0.0161694	-1.1129
PSMG1	-1.11022	5.35645	-4.21268	0.0018954	0.0161694	-1.42418
DHX8	-0.968731	4.14315	-4.21008	0.0019031	0.0161825	-1.38015
TARBP2	-0.974914	4.00011	-4.20948	0.00190486	0.0161825	-1.35636
FEN1	-1.16698	7.58439	-4.20923	0.00190563	0.0161825	-1.80798
UNC93B1	-1.35938	4.4966	-4.20852	0.00190773	0.0161825	-1.50322
LFNG	-1.35028	3.30915	-4.20819	0.00190871	0.0161825	-1.21556
TRMT112	-0.568195	9.74588	-4.20798	0.00190934	0.0161825	-1.92371
FARSB	-0.639787	7.27435	-4.20541	0.00191702	0.0162205	-1.77916
WDCP	-1.08256	4.38577	-4.20257	0.00192553	0.016279	-1.52001
HMGB3	-0.709353	7.27179	-4.19775	0.00194007	0.0163773	-1.76337
JPT1	-0.609233	9.06513	-4.19057	0.00196194	0.0165456	-1.93786
BCAP31	-0.690496	7.59994	-4.18236	0.00198728	0.0167178	-1.89075
U2AF2	-1.014	7.41411	-4.18138	0.00199033	0.0167192	-1.80373
DCAF13	-0.669769	6.56877	-4.18092	0.00199174	0.0167192	-1.73427
B4GALT7	-0.681804	5.74326	-4.17988	0.00199498	0.0167192	-1.70643
C7orf50	-0.764716	6.20783	-4.17967	0.00199566	0.0167192	-1.76534
TMEM104	-1.57159	2.80874	-4.17813	0.00200046	0.0167345	-1.19031
SHMT2	-0.696555	6.7851	-4.17243	0.00201837	0.0168401	-1.80012
PUDP	-0.74984	5.07016	-4.16188	0.00205198	0.0170653	-1.65988
ETF1	-0.708565	6.91965	-4.16186	0.00205206	0.0170653	-1.82494
MFSD5	-0.815536	5.20914	-4.16124	0.00205405	0.0170679	-1.61332
TMEM70	-0.993296	6.24974	-4.16	0.00205804	0.0170732	-1.70024
RBM3	-0.813863	7.84724	-4.15793	0.00206472	0.0171147	-1.82765
DRG1	-0.772124	6.61837	-4.15339	0.00207948	0.0172229	-1.82416
IKBKE	-1.64249	2.29539	-4.14968	0.00209158	0.0172945	-1.21323
NDUFA10	-0.59053	7.09281	-4.14903	0.00209373	0.0172945	-1.91155
POLD2	-1.02351	6.8978	-4.14867	0.00209492	0.0172945	-1.9008
IDH3A	-0.767852	5.93114	-4.14735	0.00209923	0.0173021	-1.75414
FBXW9	-1.32922	2.88701	-4.14459	0.00210835	0.0173592	-1.28558
DYNLL1	-0.592458	8.50909	-4.14213	0.0021165	0.0173726	-1.93003
MSANTD4	-0.790811	5.30517	-4.14189	0.0021173	0.0173726	-1.68257
IVD	-0.798966	5.53919	-4.14167	0.00211803	0.0173726	-1.74451
TMEM141	-0.808884	6.42348	-4.13933	0.00212582	0.0173832	-1.86097
UROS	-0.902067	5.67346	-4.13923	0.00212615	0.0173832	-1.76041
SEPHS1	-0.896274	5.16139	-4.13783	0.00213085	0.0174044	-1.55851
NME3	-0.967728	5.37011	-4.13611	0.0021366	0.0174044	-1.75455
RAMP1	-1.30548	3.99205	-4.13595	0.00213712	0.0174044	-1.48794
RCCD1	-0.744158	5.47143	-4.1359	0.0021373	0.0174044	-1.7064
HGH1	-1.61711	3.24168	-4.13408	0.00214341	0.0174402	-1.34035
ANXA1	-0.858639	6.22256	-4.13302	0.002147	0.0174555	-1.66628
NEDD8	-0.835825	8.12922	-4.13244	0.00214895	0.0174574	-1.94662
YME1L1	-0.642358	6.47931	-4.12033	0.00219021	0.0177219	-1.85717
BLM	-1.08366	4.24246	-4.11471	0.00220963	0.0177999	-1.58703
RANGAP1	-0.634924	6.99176	-4.11454	0.00221023	0.0177999	-1.95524
MRPL43	-0.67725	7.04009	-4.11451	0.00221034	0.0177999	-1.91473
C5orf22	-0.94578	4.9188	-4.11126	0.00222167	0.0178738	-1.57558
SRRT	-0.660039	6.7676	-4.11023	0.00222526	0.0178738	-1.91249
CENPV	-0.642157	7.07412	-4.10898	0.00222965	0.0178738	-1.92127
NOP2	-0.832601	5.40066	-4.10886	0.00223006	0.0178738	-1.74118
BCLAF1	-0.813423	6.36175	-4.10801	0.00223305	0.0178838	-1.83293
PLK1	-0.711946	6.36008	-4.10501	0.00224361	0.0179404	-1.8565
CCDC86	-1.04834	5.4046	-4.10461	0.00224504	0.0179404	-1.68936
MRFAP1L1	-0.657085	6.21888	-4.10301	0.0022507	0.0179404	-1.8387
EIF2S1	-0.760031	5.80619	-4.09977	0.0022622	0.018018	-1.80892
NOP16	-0.801908	6.54902	-4.09702	0.00227204	0.0180821	-1.92546
ARF3	-0.607409	8.09818	-4.09554	0.00227732	0.0181021	-2.03131
SMARCA2	-1.23706	3.34488	-4.09527	0.0022783	0.0181021	-1.44094
LCLAT1	-1.02408	4.6887	-4.09466	0.00228049	0.0181021	-1.5994
MUL1	-0.99775	4.65647	-4.09346	0.00228481	0.0181021	-1.65293
COMTD1	-0.728353	5.2284	-4.09127	0.00229269	0.0181205	-1.84908
FANCG	-0.712467	5.45505	-4.09101	0.00229363	0.0181205	-1.86633
CCNQ	-0.888353	5.16111	-4.09096	0.00229382	0.0181205	-1.81249
COPS3	-0.71811	6.64389	-4.0903	0.00229621	0.0181205	-1.9249
OR7E38P	-2.21518	1.69484	-4.0881	0.00230419	0.0181535	-1.16442
CRELD2	-0.653091	5.94439	-4.08502	0.00231539	0.0182276	-1.88445
ZNF326	-0.89378	4.92126	-4.08061	0.00233153	0.0183238	-1.6483
HNRNPDL	-0.555843	8.37864	-4.08021	0.002333	0.0183238	-2.04713
TSR1	-0.618919	6.46692	-4.07887	0.00233794	0.0183398	-1.94532
CTNNBL1	-0.838284	5.475	-4.07507	0.00235202	0.0184031	-1.8879
AP2M1	-0.912879	6.96999	-4.07488	0.0023527	0.0184031	-1.94806
HMGN3	-0.671262	7.01911	-4.07024	0.00237	0.0185047	-1.93648
ANKEF1	-1.15975	3.83224	-4.07009	0.00237058	0.0185047	-1.51949
NDUFS3	-0.588806	7.45151	-4.06904	0.0023745	0.0185069	-2.06827
TOE1	-1.04467	3.64837	-4.06643	0.00238428	0.0185548	-1.59265
ERH	-0.469461	9.39275	-4.06243	0.00239941	0.0186297	-2.1967
PEF1	-0.995693	4.75714	-4.06128	0.00240376	0.0186463	-1.73741
UBE2L3	-0.922809	6.18742	-4.06053	0.00240664	0.0186463	-1.94857
NDUFA8	-0.789381	7.1229	-4.0604	0.0024071	0.0186463	-1.991
WDR18	-0.977686	7.02174	-4.05868	0.00241368	0.0186486	-2.00391
MRM3	-0.949152	4.0649	-4.05842	0.00241467	0.0186486	-1.64302
C9orf116	-1.09913	4.10611	-4.05699	0.00242012	0.0186766	-1.62246
PHF5A	-0.778676	6.51001	-4.05461	0.00242925	0.0187186	-2.0201
MIS12	-1.18544	3.75153	-4.05367	0.00243287	0.0187323	-1.46829
TSSC4	-1.18753	4.94029	-4.05154	0.00244106	0.0187812	-1.85503
ARHGDIA	-0.717051	7.06193	-4.04462	0.00246792	0.0189308	-1.95526
SF3B4	-0.913925	4.67762	-4.04461	0.00246794	0.0189308	-1.76164
STEAP1	-1.12429	3.96332	-4.04003	0.00248592	0.0190262	-1.55965
ROMO1	-0.527011	8.7523	-4.04001	0.00248598	0.0190262	-2.22517
TEDC2	-1.06181	3.86304	-4.03911	0.00248953	0.019039	-1.77027
MFN2	-0.74173	5.8812	-4.03795	0.00249412	0.0190598	-1.87735
AAGAB	-0.573512	7.48384	-4.0279	0.00253412	0.019322	-2.12411
EIF2B4	-0.857431	5.17224	-4.01946	0.00256824	0.0194918	-1.92719
GEMIN5	-1.22068	4.12526	-4.01907	0.0025698	0.0194918	-1.59558
PDCD6	-0.674193	6.99632	-4.0133	0.00259341	0.0196562	-2.04606
VTI1A	-0.693267	5.66202	-4.00929	0.00260999	0.0197672	-1.96889
YWHAH	-0.678425	6.23514	-4.00756	0.00261715	0.0197936	-1.99749
G6PC3	-1.05464	4.31758	-4.00751	0.00261737	0.0197936	-1.76007
TRMU	-1.09576	5.195	-4.00575	0.00262469	0.0198343	-1.96168
MPC1	-2.89415	1.94094	-4.00465	0.00262925	0.019854	-1.2856
HCFC1	-0.657318	6.98066	-4.00395	0.00263219	0.0198615	-2.10391
ADCK1	-1.25234	2.56691	-3.99971	0.00264998	0.0199809	-1.48826
ATMIN	-0.705044	6.19525	-3.99875	0.002654	0.0199964	-1.96453
TPRN	-1.40786	3.31204	-3.99512	0.00266936	0.020056	-1.67028
STIP1	-0.671188	7.78707	-3.99496	0.00267004	0.020056	-2.16711
AMMECR1	-0.993127	4.82174	-3.99483	0.00267056	0.020056	-1.78705
MRPL22	-0.681439	5.59563	-3.99455	0.00267176	0.020056	-1.95987
ZDHHC12	-0.893012	4.59006	-3.99116	0.0026862	0.0201495	-1.82978
THEM6	-0.85169	4.53322	-3.98686	0.0027046	0.0202545	-1.90084
MEPCE	-0.764514	4.96606	-3.9865	0.00270618	0.0202545	-1.96571
MAGEB2	-0.600079	7.86887	-3.98461	0.0027143	0.020289	-2.1726
PSMD12	-0.709078	6.3173	-3.98342	0.00271942	0.020294	-2.00933
UTP14A	-1.08175	3.93937	-3.98117	0.0027292	0.0203223	-1.67825
C1orf131	-1.04699	4.42231	-3.98117	0.0027292	0.0203223	-1.70653
MRPS21	-0.511542	8.48353	-3.98006	0.00273402	0.0203433	-2.2503
ZNHIT2	-1.77475	3.12806	-3.97695	0.00274758	0.0204292	-1.59617
BABAM1	-0.658123	6.60709	-3.96746	0.00278937	0.0206946	-2.16638
ADRM1	-0.555368	7.78374	-3.96429	0.00280347	0.0207538	-2.25192
LGALS3BP	-0.613843	7.27102	-3.96383	0.00280555	0.0207541	-2.19972
VPS9D1-AS1	-1.67596	3.41243	-3.96117	0.00281744	0.020827	-1.55925
CYB561	-0.695817	6.77291	-3.95851	0.00282942	0.0208988	-2.13477
HNRNPR	-0.703822	6.92657	-3.9581	0.00283127	0.0208988	-2.09597
NELFB	-0.98692	7.03489	-3.95049	0.00286579	0.0211077	-2.23012
NOLC1	-0.770266	7.23137	-3.94994	0.00286833	0.0211111	-2.19115
LSM1	-0.644838	5.96004	-3.94596	0.0028866	0.0212302	-2.10902
SOD2	-0.849351	5.4436	-3.94371	0.00289697	0.0212706	-2.00752
MITF	-2.30263	1.75226	-3.94341	0.00289835	0.0212706	-1.38485
PTPMT1	-0.834654	4.60137	-3.94182	0.00290569	0.0212882	-1.89792
NOP14	-0.643936	6.38565	-3.94149	0.00290724	0.0212882	-2.14046
RABEPK	-0.735716	6.32171	-3.93948	0.00291657	0.0212882	-2.11884
TAOK2	-1.30994	3.92962	-3.93825	0.00292231	0.0212982	-1.85889
ATPAF1	-0.823642	5.41831	-3.93782	0.00292432	0.0212982	-2.0469
CFL2	-1.1879	3.99347	-3.93764	0.00292513	0.0212982	-1.70552
TRMT10C	-0.839843	5.81002	-3.93444	0.00294013	0.0213769	-1.99075
LAMTOR2	-0.657279	6.05479	-3.9337	0.00294358	0.0213866	-2.17608
SNX17	-0.76777	5.16521	-3.93243	0.00294957	0.0213997	-2.07613
TBC1D7	-1.01055	4.11816	-3.93008	0.00296068	0.0214649	-1.82058
EI24	-0.555006	8.05846	-3.9283	0.0029691	0.0215106	-2.30139
LAP3	-1.1906	4.21627	-3.92496	0.00298497	0.0216102	-1.74981
SETD1B	-0.793979	4.82699	-3.92389	0.00299009	0.0216319	-1.95769
PRCC	-0.766736	4.37832	-3.9193	0.00301207	0.02176	-2.02257
POP7	-0.868495	7.74857	-3.91883	0.00301432	0.0217601	-2.30936
TGFBRAP1	-0.878799	4.23973	-3.91841	0.00301636	0.0217601	-1.91587
AGPS	-0.806403	5.21471	-3.91774	0.00301959	0.021768	-2.00835
POLR3K	-0.754671	5.81117	-3.91625	0.00302678	0.0218044	-2.18358
RBM12	-0.754222	5.52321	-3.9148	0.00303385	0.0218244	-1.9961
CHD4	-0.536415	7.78986	-3.91427	0.00303638	0.0218272	-2.32293
NPM3	-0.532389	9.95505	-3.91304	0.00304236	0.0218548	-2.50598
DDX49	-0.88209	4.68869	-3.91209	0.00304699	0.0218572	-1.98289
BAP1	-0.943943	4.39818	-3.90753	0.00306932	0.0219554	-1.98875
RBM19	-1.17868	3.25205	-3.90594	0.00307714	0.0219959	-1.69728
CCNA2	-0.877363	5.38109	-3.90397	0.00308685	0.0220499	-1.93863
NDUFA11	-1.04599	7.38047	-3.89965	0.00310827	0.0221717	-2.30287
SLC25A28	-0.873929	3.96528	-3.8983	0.00311497	0.0221979	-1.91163
LRRC20	-0.908086	4.47713	-3.89799	0.0031165	0.0221979	-1.95295
CHAF1A	-0.781467	5.11351	-3.8976	0.00311849	0.0221979	-2.09301
ZC3HAV1	-0.826966	4.86345	-3.8949	0.00313197	0.0222537	-1.99929
SURF1	-0.972683	5.63464	-3.89472	0.00313288	0.0222537	-2.15583
LMNB1	-0.768737	6.06827	-3.89198	0.00314664	0.0223203	-2.14044
MRPL20-AS1	-0.844188	4.66763	-3.8901	0.00315614	0.0223618	-2.06972
NUDT16L1	-0.743175	5.70186	-3.8897	0.00315817	0.0223618	-2.20218
MRPS18A	-0.824894	5.76178	-3.88916	0.00316091	0.0223618	-2.1969
MRPL21	-0.657881	6.5502	-3.88507	0.00318169	0.0224715	-2.25722
DDX39A	-0.735537	5.46153	-3.88326	0.0031909	0.0224932	-2.1116
GSTK1	-0.690876	5.65756	-3.87917	0.00321191	0.0225943	-2.16236
THRAP3	-0.716889	6.52657	-3.87651	0.00322565	0.0226441	-2.25562
APRT	-0.559421	7.40386	-3.87582	0.0032292	0.0226501	-2.36492
CDC25C	-0.864121	5.27589	-3.87548	0.00323096	0.0226501	-2.13279
CRY1	-1.11234	3.41499	-3.87477	0.00323466	0.0226544	-1.76593
GTF3C6	-1.23106	4.84134	-3.87451	0.00323602	0.0226544	-1.96282
PSMB2	-0.652802	7.50108	-3.87352	0.00324113	0.0226721	-2.3265
WDR3	-0.743415	5.55666	-3.87316	0.003243	0.0226721	-2.12864
ASH2L	-0.689376	4.9258	-3.86915	0.00326393	0.0227634	-2.14422
SPCS1	-0.674718	6.88884	-3.86895	0.00326501	0.0227634	-2.3258
CLN3	-1.11129	3.59909	-3.86595	0.00328075	0.0228418	-1.88132
PAFAH1B3	-0.854315	6.15457	-3.86549	0.00328318	0.0228431	-2.2773
DSTN	-0.50979	8.56625	-3.8643	0.00328946	0.0228598	-2.46468
RNASEH2B	-1.0635	4.58764	-3.86354	0.00329344	0.0228676	-1.96983
MRPL44	-0.816372	5.17477	-3.85858	0.0033198	0.0230104	-2.08472
PRPF19	-0.565287	7.01016	-3.85797	0.00332304	0.0230104	-2.36822
STRAP	-0.641686	7.57839	-3.85686	0.00332895	0.0230207	-2.35212
TMEM177	-0.763702	5.33514	-3.85684	0.00332906	0.0230207	-2.11746
FIBP	-0.766831	6.62205	-3.84785	0.00337752	0.0232925	-2.37171
EBP	-0.75257	5.97537	-3.8472	0.00338106	0.0233008	-2.27428
DLAT	-0.83363	5.07178	-3.84678	0.0033833	0.0233008	-2.11389
VPS25	-1.01071	5.73934	-3.83879	0.00342708	0.0235545	-2.29545
PAK2	-0.753872	5.47784	-3.83724	0.00343562	0.0235973	-2.17426
ZNF101	-1.15697	3.31346	-3.83599	0.00344251	0.023605	-1.78858
GHITM	-0.603231	7.42891	-3.83537	0.00344594	0.023605	-2.37377
GNA11	-0.986395	5.46053	-3.83514	0.00344726	0.023605	-2.22045
LRRC14	-1.04818	4.2294	-3.83464	0.00344999	0.023605	-2.08301
PTRH1	-0.881386	3.78281	-3.8345	0.00345078	0.023605	-2.0668
THOP1	-0.794346	6.99756	-3.83411	0.00345297	0.023605	-2.3816
USB1	-0.637427	6.35275	-3.83281	0.00346016	0.0236382	-2.33661
RBM12B	-1.15843	4.28299	-3.83108	0.00346983	0.0236884	-2.00476
TAF11	-0.725432	5.43279	-3.83	0.00347589	0.0237139	-2.19159
FLII	-0.692593	5.01308	-3.82908	0.003481	0.0237328	-2.19093
ANAPC15	-0.922208	4.88518	-3.82831	0.00348531	0.0237463	-2.07857
PPT1	-0.6381	5.63963	-3.82642	0.00349595	0.0237552	-2.28286
MRM2	-0.939107	4.95536	-3.82482	0.00350496	0.0237688	-2.09279
TTC26	-0.99246	3.88445	-3.82264	0.00351732	0.0238136	-1.99062
DHX15	-0.579469	7.09085	-3.82159	0.00352322	0.0238291	-2.386
ZW10	-0.748749	4.9802	-3.81937	0.00353586	0.0238829	-2.23296
HOXA10	-1.0524	4.43457	-3.81839	0.00354147	0.0238943	-1.98712
C19orf48	-0.911655	5.0758	-3.81825	0.00354224	0.0238943	-2.23024
CDK5RAP1	-0.882131	4.69197	-3.81682	0.0035504	0.0239334	-2.15651
BAD	-1.04257	4.2942	-3.81413	0.00356586	0.0240098	-2.09958
HYOU1	-0.805161	6.92387	-3.81344	0.00356979	0.0240098	-2.30266
SNX12	-0.708654	5.67386	-3.81298	0.00357245	0.0240098	-2.2535
SPATA33	-0.81266	4.33621	-3.81281	0.00357344	0.0240098	-2.13074
EVA1C	-1.2593	2.84299	-3.8128	0.00357352	0.0240098	-1.76398
MPHOSPH6	-0.620263	6.97519	-3.81215	0.00357721	0.0240188	-2.43927
RRP9	-0.665523	5.3642	-3.80404	0.00362433	0.0242714	-2.26922
AP1B1	-0.582974	7.52932	-3.80403	0.00362438	0.0242714	-2.48015
VCP	-0.611769	7.36922	-3.80082	0.00364315	0.0243811	-2.47422
CENPO	-0.831559	4.0297	-3.79963	0.00365016	0.0244119	-2.08201
ZNF576	-1.1499	4.09082	-3.79881	0.00365499	0.0244122	-2.04863
MSRB1	-0.804153	5.2898	-3.79633	0.00366963	0.0244939	-2.27999
PSMD3	-0.67535	8.4004	-3.79235	0.0036933	0.0246035	-2.53951
RBP7	-0.787441	5.1311	-3.78891	0.00371386	0.0247243	-2.24936
NCOA4	-0.560339	6.67179	-3.7872	0.00372416	0.0247604	-2.43828
PIN1	-0.84043	5.60403	-3.78517	0.00373634	0.0248228	-2.35513
SOD1	-0.572469	9.47253	-3.78474	0.00373895	0.0248228	-2.62087
RTCB	-0.651407	5.97799	-3.78438	0.00374114	0.0248228	-2.42315
EIF2B3	-0.953858	3.923	-3.78402	0.0037433	0.0248228	-2.04205
NIP7	-0.780087	4.99008	-3.78238	0.00375325	0.0248564	-2.19446
AIMP2	-0.693865	6.75534	-3.78126	0.00376003	0.0248689	-2.46044
RER1	-0.602042	6.79364	-3.77443	0.00380172	0.0251121	-2.47542
ELOF1	-0.726346	5.41858	-3.77052	0.00382586	0.0252388	-2.31268
MCRS1	-1.16841	5.97236	-3.76906	0.00383489	0.025282	-2.37036
NCDN	-0.948974	3.93438	-3.76795	0.00384181	0.0252948	-2.05454
HNRNPF	-0.619918	8.53382	-3.76618	0.00385278	0.0253442	-2.55607
CLN6	-1.0258	4.06122	-3.76582	0.00385504	0.0253442	-2.13988
MAPRE2	-1.18971	3.77636	-3.76353	0.00386937	0.0253876	-1.97723
CHAF1B	-0.924422	4.3596	-3.76329	0.00387087	0.0253876	-2.1934
NPM1	-0.516344	9.42733	-3.75846	0.00390121	0.0255537	-2.613
SNRPD1	-0.477306	9.07934	-3.7579	0.00390472	0.0255602	-2.63587
NUP210	-0.709989	5.84462	-3.75684	0.00391148	0.025588	-2.39811
TAB1	-0.873731	4.05067	-3.7543	0.00392755	0.0256766	-2.11905
RNF40	-0.854681	5.1849	-3.75165	0.00394444	0.025721	-2.342
UQCR11	-0.682093	7.19141	-3.75024	0.00395346	0.0257633	-2.52
CYB5B	-0.57489	8.39082	-3.74527	0.00398542	0.0259384	-2.59663
CDK2AP2	-0.725437	6.60622	-3.7427	0.00400203	0.0260063	-2.46364
NPLOC4	-0.605214	6.3769	-3.74252	0.00400322	0.0260063	-2.52869
PSMD7	-0.591276	6.46215	-3.74247	0.00400352	0.0260063	-2.48466
CD320	-0.766348	5.41537	-3.73977	0.00402104	0.0260786	-2.43112
DCAF7	-0.66964	6.84081	-3.73906	0.00402571	0.0260786	-2.50583
MRPS2	-0.742952	6.81788	-3.73879	0.00402746	0.0260786	-2.5441
DNAJB1	-0.581875	8.49646	-3.73775	0.00403425	0.0260894	-2.72104
PTTG1	-0.751476	7.54011	-3.73371	0.00406075	0.0261942	-2.55232
GSTP1	-0.475851	10.4611	-3.73222	0.00407056	0.0262408	-2.8043
BANF1	-1.0202	5.76555	-3.7295	0.00408858	0.026307	-2.32933
SHMT1	-1.03171	4.2394	-3.72824	0.00409693	0.026344	-2.12694
ANKRD39	-0.643273	5.32284	-3.72683	0.00410631	0.0263877	-2.40157
AVEN	-1.09681	2.95368	-3.72573	0.00411361	0.026418	-2.00151
POLR3B	-0.889487	4.05032	-3.72241	0.00413584	0.026517	-2.1371
LINC01234	-0.85524	5.18872	-3.72226	0.00413685	0.026517	-2.36102
MRTFB	-1.09097	3.50768	-3.72153	0.00414176	0.0265317	-1.97643
PCCB	-0.758028	4.72655	-3.71945	0.00415576	0.026588	-2.2943
FANCA	-0.727086	5.3725	-3.71401	0.00419263	0.0267425	-2.46758
SDR42E1	-0.790337	4.46545	-3.71395	0.00419305	0.0267425	-2.27493
EMC10	-0.75663	7.12098	-3.71289	0.00420025	0.0267692	-2.58996
POLA2	-0.855626	3.88335	-3.70904	0.0042266	0.0268723	-2.21128
ATRAID	-0.605832	6.14651	-3.70603	0.00424732	0.0269737	-2.53326
AP1AR	-0.677519	6.16631	-3.70569	0.00424967	0.0269737	-2.46168
C19orf24	-1.01186	5.54747	-3.70557	0.0042505	0.0269737	-2.4875
DMKN	-0.630567	6.5743	-3.70244	0.00427214	0.0270871	-2.57285
HAUS2	-1.00359	4.80606	-3.70222	0.00427369	0.0270871	-2.20707
GATC	-0.743362	5.17137	-3.69706	0.00430965	0.0272303	-2.42623
PTER	-1.193	4.12768	-3.69646	0.00431383	0.0272397	-2.15324
DPM2	-0.725908	4.43444	-3.69126	0.0043505	0.0273922	-2.39487
KIF23	-1.17479	4.58257	-3.69113	0.00435143	0.0273922	-2.20063
PSPC1	-0.921063	4.46394	-3.68817	0.00437242	0.0274982	-2.2033
AP5S1	-1.40068	2.89289	-3.68761	0.00437637	0.0274982	-1.95964
SNAPC2	-0.679236	5.45673	-3.68472	0.00439703	0.0275729	-2.4888
DNM1L	-0.688587	5.31345	-3.68443	0.00439909	0.0275729	-2.42161
EXOSC3	-0.947427	5.21088	-3.68398	0.00440227	0.0275758	-2.34379
MLYCD	-0.909389	3.89286	-3.68205	0.00441612	0.0276001	-2.23159
ZC3HC1	-0.626334	5.09859	-3.67853	0.00444152	0.0276515	-2.50421
PSMD8	-0.516045	8.06321	-3.67533	0.00446468	0.0277617	-2.7352
SERBP1	-0.586621	8.52063	-3.67233	0.00448654	0.0278121	-2.7711
RNF187	-0.615394	7.89639	-3.6718	0.00449045	0.0278121	-2.71878
PPIE	-0.644589	6.12143	-3.67048	0.0045001	0.0278121	-2.57181
CDCA4	-0.72995	6.49298	-3.66962	0.00450637	0.0278167	-2.61321
PSMC4	-0.770455	6.47387	-3.66926	0.00450904	0.0278167	-2.60445
SCO1	-0.574686	6.35099	-3.66637	0.00453033	0.0278973	-2.59957
TNRC6A	-0.837357	5.71866	-3.66423	0.00454613	0.0279641	-2.51734
SCLY	-1.58669	2.11421	-3.65827	0.00459047	0.0281099	-1.91164
PDSS1	-1.92352	2.71197	-3.65628	0.00460541	0.0281553	-1.98412
ECI2	-0.652498	5.68911	-3.65323	0.00462838	0.0282448	-2.52065
C15orf39	-0.880588	3.52499	-3.65	0.00465279	0.0283173	-2.26902
UHRF1	-1.07902	4.17488	-3.64919	0.00465894	0.0283294	-2.20174
MANBAL	-1.00286	5.10418	-3.6438	0.0047001	0.0285115	-2.52979
DUT	-0.660244	5.96148	-3.64286	0.00470728	0.0285309	-2.4978
COX5A	-0.487737	7.99138	-3.64265	0.0047089	0.0285309	-2.78425
BCL2L12	-0.729485	7.22054	-3.64188	0.00471487	0.0285501	-2.73844
ABCE1	-0.676821	6.02673	-3.64109	0.00472094	0.0285698	-2.54844
E2F1	-0.74012	4.59581	-3.64069	0.00472403	0.0285715	-2.4374
ENHO	-0.796537	3.9467	-3.63767	0.00474736	0.0286616	-2.432
RNASEH1	-0.95714	4.76818	-3.63615	0.00475912	0.0287095	-2.43073
NDUFAF1	-1.15339	4.01382	-3.63397	0.00477609	0.0287497	-2.23317
USP31	-1.40891	2.80286	-3.63334	0.00478098	0.0287622	-2.14645
RPA3	-0.762291	6.33842	-3.63215	0.00479036	0.0287854	-2.6365
POGK	-0.70999	4.66582	-3.63213	0.0047905	0.0287854	-2.45806
PARL	-0.80425	6.48215	-3.63162	0.00479447	0.0287862	-2.66363
NDUFA4	-0.529764	7.48704	-3.62822	0.00482119	0.0289186	-2.73177
CD83	-1.01807	3.38701	-3.62604	0.00483836	0.0289875	-2.21299
DDX19A	-0.754282	5.13893	-3.62379	0.00485614	0.0290429	-2.50972
COQ4	-0.768261	4.73963	-3.62269	0.00486487	0.0290778	-2.4976
COG8	-0.715256	5.49663	-3.62095	0.00487879	0.0291268	-2.61333
RAB26	-0.846521	4.17924	-3.62047	0.0048826	0.0291325	-2.41904
COASY	-0.762481	5.12832	-3.61892	0.00489498	0.0291641	-2.5877
PADI3	-0.945995	3.99828	-3.6188	0.00489589	0.0291641	-2.32341
MTDH	-0.560054	8.35022	-3.61837	0.00489936	0.0291641	-2.84981
HACD3	-0.545254	6.86456	-3.61771	0.00490465	0.0291785	-2.70818
GRK6	-0.704711	5.80918	-3.61257	0.00494607	0.0293075	-2.65578
APEH	-0.629043	7.23745	-3.61235	0.00494778	0.0293075	-2.79553
PARP12	-1.0229	3.4323	-3.61216	0.00494936	0.0293075	-2.20887
SECTM1	-1.20896	3.05901	-3.60988	0.00496781	0.0293996	-2.20488
KHDRBS1	-0.573479	7.54436	-3.60581	0.00500099	0.0295616	-2.76806
PPIL1	-0.659348	5.67556	-3.60375	0.00501794	0.0296274	-2.61638
MDH2	-0.436564	8.67158	-3.60274	0.00502623	0.0296591	-2.93185
CDK5	-0.958168	5.60014	-3.60153	0.00503612	0.0297003	-2.6518
ARMC1	-0.678742	5.98979	-3.60033	0.00504603	0.0297415	-2.59915
MSH2	-0.775329	5.18107	-3.59829	0.00506291	0.0297892	-2.43366
STMP1	-0.612655	6.16108	-3.59777	0.00506725	0.0297975	-2.64434
TOMM7	-0.42244	9.81909	-3.5965	0.0050778	0.0298251	-2.98959
ANXA9	-1.2464	2.51859	-3.59568	0.00508464	0.0298481	-2.06794
DHX29	-0.771071	4.5085	-3.59487	0.00509136	0.0298543	-2.42579
SSRP1	-0.437906	8.87886	-3.59484	0.00509157	0.0298543	-2.93379
CCNF	-0.646741	6.05568	-3.59439	0.00509538	0.0298594	-2.72966
SH3RF2	-1.04198	2.83864	-3.58944	0.0051368	0.0300676	-2.22773
SDR39U1	-0.681687	5.62191	-3.58777	0.00515088	0.0301153	-2.64483
PEX10	-0.905296	4.74461	-3.5871	0.00515652	0.030131	-2.53451
ATP5F1B	-0.49933	8.85579	-3.58414	0.00518159	0.0302254	-2.9319
ZNF346	-0.81315	4.2336	-3.58282	0.00519277	0.0302733	-2.47208
CALB2	-1.02772	3.62494	-3.58216	0.00519842	0.0302889	-2.305
PRIM1	-1.57667	3.00651	-3.58081	0.00520997	0.0303215	-2.07543
POLR3G	-0.797492	4.75495	-3.57879	0.00522724	0.030359	-2.41842
URB2	-1.20387	3.03389	-3.5786	0.00522881	0.030359	-2.14119
CACYBP	-1.00387	6.71046	-3.57751	0.00523822	0.0303816	-2.71067
THAP7-AS1	-1.35076	2.25223	-3.57546	0.00525584	0.0304492	-2.09037
MYL6	-0.467283	8.56007	-3.57362	0.00527167	0.0305235	-2.93744
COMMD8	-1.10508	4.32244	-3.57083	0.00529586	0.030612	-2.35965
PUM3	-0.634809	6.21653	-3.5691	0.00531089	0.0306808	-2.73334
C12orf10	-0.690304	4.63192	-3.56483	0.00534826	0.0308267	-2.61441
UCK1	-0.779962	4.48686	-3.56436	0.00535236	0.0308328	-2.5294
POP1	-1.16712	5.27329	-3.56178	0.00537506	0.0309461	-2.67496
RUFY1	-0.715101	5.24531	-3.55981	0.00539248	0.0310288	-2.72642
POLQ	-1.32574	2.62404	-3.5582	0.00540668	0.0310579	-2.11563
GAK	-0.697869	6.1077	-3.55716	0.00541594	0.031076	-2.76433
SLC25A46	-0.917264	4.12109	-3.54992	0.0054807	0.0314299	-2.39272
CHCHD2	-0.752615	11.1102	-3.54572	0.00551859	0.0316116	-3.16924
HAUS1	-1.15816	4.15719	-3.54143	0.00555761	0.0317814	-2.29611
PRDX4	-0.637806	7.02049	-3.5375	0.00559368	0.0319697	-2.8912
ADSL	-0.707948	5.61396	-3.53438	0.00562241	0.0320978	-2.70466
MRPS11	-0.71512	4.80218	-3.53268	0.00563815	0.0321697	-2.65077
CCDC34	-0.683634	6.37881	-3.53038	0.00565946	0.0322551	-2.81079
FDPS	-0.745584	6.3222	-3.52728	0.00568838	0.0323656	-2.85172
SRSF10	-0.619883	6.42268	-3.52661	0.00569467	0.0323832	-2.83523
TOMM70	-0.480429	7.61216	-3.52257	0.00573264	0.0325265	-2.9679
MTA2	-0.687554	6.38946	-3.52196	0.00573841	0.0325411	-2.85293
HIBCH	-0.761466	5.51538	-3.52051	0.0057521	0.0325643	-2.68865
RTRAF	-0.530254	7.07054	-3.5193	0.00576355	0.032611	-2.89497
CALR	-0.446778	8.83678	-3.51554	0.00579937	0.0327954	-3.0501
DGKQ	-0.896117	5.38171	-3.50996	0.00585284	0.0330543	-2.80996
CSE1L	-0.674474	7.71851	-3.50975	0.00585488	0.0330543	-2.9769
CDC37	-0.631478	9.42216	-3.50876	0.0058644	0.0330713	-3.12538
EIF4EBP2	-0.545404	6.2086	-3.50742	0.00587735	0.033126	-2.85828
NASP	-0.500768	8.25391	-3.50368	0.00591365	0.0333122	-3.06439
C4orf48	-1.62959	5.939	-3.50136	0.00593625	0.033421	-2.83534
TPRA1	-0.653669	4.76565	-3.50083	0.00594148	0.0334319	-2.77503
RRP7A	-0.674175	5.02088	-3.49682	0.00598084	0.0335791	-2.74579
SRPRB	-0.701118	6.7041	-3.49647	0.00598425	0.0335798	-2.93497
MRPS10	-0.891699	6.30258	-3.49613	0.00598761	0.0335801	-2.83525
EXOSC6	-0.620219	6.27521	-3.49347	0.00601399	0.0337095	-2.8305
RAE1	-0.742408	7.4215	-3.4924	0.00602452	0.0337499	-2.99801
CHERP	-0.610941	5.74189	-3.48956	0.0060528	0.0338368	-2.77764
ZDHHC14	-0.795505	4.13725	-3.48951	0.00605332	0.0338368	-2.68529
NSL1	-0.763014	5.34176	-3.48692	0.00607921	0.0338927	-2.72251
PDE12	-0.85444	4.82634	-3.48681	0.00608032	0.0338927	-2.64202
MRPL30	-0.710041	5.62434	-3.48665	0.00608195	0.0338927	-2.82742
EXOSC5	-0.753943	4.76821	-3.48651	0.00608331	0.0338927	-2.76993
LARS2	-0.840308	4.19432	-3.48207	0.00612801	0.0340858	-2.6196
CCND3	-0.869225	5.15485	-3.47872	0.006162	0.0342374	-2.84143
NINJ1	-0.706761	4.69451	-3.4771	0.00617842	0.034303	-2.70963
TPGS2	-0.567167	6.38146	-3.4769	0.00618054	0.034303	-2.92008
RAB5C	-0.685473	8.25097	-3.47485	0.00620139	0.0343812	-3.08591
DLEU2	-1.35439	3.2421	-3.47446	0.00620544	0.0343849	-2.25963
COMMD7	-0.741535	4.63769	-3.47028	0.00624836	0.0345641	-2.66777
NUP214	-0.875568	4.06324	-3.46999	0.00625135	0.0345641	-2.60826
PMPCA	-1.02832	4.83986	-3.46871	0.00626456	0.0346068	-2.76067
SUCLG1	-0.535114	6.30852	-3.46859	0.00626587	0.0346068	-2.92649
FES	-0.986278	3.155	-3.46758	0.00627625	0.0346265	-2.44416
SUPT16H	-0.475069	7.99714	-3.46497	0.00630333	0.0347571	-3.0749
BOP1	-1.0947	6.01543	-3.4644	0.00630933	0.0347714	-2.93349
SNRNP200	-0.503059	7.60153	-3.46278	0.00632616	0.0348452	-3.05728
API5	-0.728801	5.40411	-3.46236	0.00633061	0.0348509	-2.67537
AKT1S1	-1.16669	4.87543	-3.45785	0.00637788	0.0350487	-2.82196
SAP18	-0.51429	8.05678	-3.45762	0.00638032	0.0350487	-3.07139
ATP5F1EP2	-1.46867	2.79896	-3.45581	0.00639946	0.0351165	-2.20424
SF3B5	-0.737018	8.76209	-3.4558	0.00639957	0.0351165	-3.12063
CCDC127	-0.759293	4.44909	-3.45518	0.00640607	0.0351333	-2.72065
IRF1	-0.840638	4.32072	-3.45393	0.00641931	0.0351869	-2.64636
SCARA3	-0.957907	4.03657	-3.45066	0.0064541	0.0353375	-2.60701
EEF1AKMT1	-0.599025	5.85484	-3.45056	0.00645522	0.0353375	-2.94311
ZNF142	-0.919922	3.14544	-3.45037	0.00645719	0.0353375	-2.4951
REX1BD	-0.865669	6.14482	-3.4482	0.00648042	0.0354265	-2.99266
PPAT	-0.885262	4.44515	-3.44677	0.00649577	0.0354723	-2.59666
HNRNPC	-0.487544	8.16936	-3.44533	0.00651125	0.0355188	-3.10845
DCTN1	-0.852685	5.93314	-3.43866	0.00658334	0.0358185	-2.95675
GMFB	-0.665463	5.65945	-3.43862	0.00658379	0.0358185	-2.84389
CPSF2	-0.764137	5.1465	-3.43409	0.00663329	0.03603	-2.8071
GPN1	-0.762973	5.18372	-3.43328	0.00664226	0.0360403	-2.77687
NOC4L	-0.980151	3.77027	-3.43292	0.00664618	0.0360423	-2.71599
OTUB1	-0.64957	5.74476	-3.43195	0.00665689	0.0360734	-2.96848
EBNA1BP2	-0.745759	6.74769	-3.43175	0.006659	0.0360734	-3.01546
SAMM50	-0.618551	5.7115	-3.43116	0.00666554	0.0360896	-2.95648
SMUG1	-0.628222	4.82492	-3.42916	0.00668766	0.0361575	-2.83848
GPX1	-0.487394	7.63419	-3.4289	0.00669047	0.0361575	-3.12814
PPP1CA	-0.961539	7.52638	-3.42874	0.00669232	0.0361575	-3.10782
IDE	-0.761253	4.91569	-3.42697	0.00671188	0.0362058	-2.75188
SLC16A14	-1.01855	3.84265	-3.42542	0.00672915	0.0362605	-2.50062
DNTTIP2	-0.79562	5.23787	-3.42364	0.00674895	0.0363172	-2.79657
RCN2	-0.606947	6.79512	-3.42352	0.00675038	0.0363172	-2.97524
PRKAB1	-1.01373	4.0272	-3.42282	0.00675811	0.0363396	-2.69629
KIF4A	-0.828559	5.53072	-3.42211	0.0067661	0.0363633	-2.88632
ORC3	-0.912282	3.83052	-3.42076	0.00678121	0.0364253	-2.59132
EME1	-1.0112	3.97469	-3.42014	0.00678818	0.0364435	-2.65337
NR6A1	-1.1403	2.78604	-3.41793	0.00681311	0.0365196	-2.42241
C19orf53	-0.694606	6.64828	-3.41559	0.00683949	0.0366031	-3.04393
ADAM15	-0.659048	7.02549	-3.41524	0.00684348	0.0366053	-3.04736
CTDNEP1	-0.668566	8.01008	-3.4141	0.00685638	0.036655	-3.15559
UBE2F	-0.675776	5.01298	-3.41191	0.00688128	0.0367495	-2.83089
RHBDD3	-1.55853	3.72598	-3.4097	0.00690651	0.0368319	-2.6809
MAPKAP1	-0.709686	5.48425	-3.40961	0.00690756	0.0368319	-2.92741
UQCR10	-0.578285	6.9813	-3.40899	0.00691463	0.0368503	-3.11078
POLE4	-0.826505	4.56513	-3.40805	0.00692547	0.0368887	-2.91305
SARS2	-0.682789	4.90091	-3.40714	0.00693585	0.0369247	-2.8562
RBM47	-0.957831	3.9553	-3.40126	0.00700378	0.0372085	-2.62276
THAP11	-0.653519	5.4476	-3.39948	0.00702451	0.0372797	-2.98731
NDUFV1	-0.47422	6.51467	-3.39562	0.00706953	0.03746	-3.148
PSMD5	-0.651086	5.26023	-3.39466	0.00708082	0.0375004	-2.91228
ISY1	-0.641098	5.17409	-3.39318	0.00709825	0.0375731	-2.91595
TRIM41	-0.731244	5.59772	-3.39098	0.00712415	0.0376325	-2.98012
MRS2	-1.0239	4.05443	-3.39087	0.0071255	0.0376325	-2.54304
HSDL2	-0.652929	5.64064	-3.39008	0.0071348	0.0376325	-3.00687
NFKB1	-0.772022	4.31727	-3.39007	0.00713487	0.0376325	-2.77771
XPO1	-0.642252	6.06911	-3.38958	0.00714073	0.0376325	-2.96217
PDCD2	-0.51683	6.95015	-3.38948	0.00714194	0.0376325	-3.07798
TMEM201	-1.12004	3.93519	-3.38941	0.00714274	0.0376325	-2.60445
CSRP1	-1.23251	3.02661	-3.38748	0.00716566	0.0377337	-2.5562
SET	-0.529164	7.59032	-3.386	0.00718323	0.0378067	-3.17711
HSPA4L	-0.847998	4.23309	-3.3846	0.00719998	0.0378557	-2.67098
ATP6V0E2	-0.757437	5.5519	-3.3813	0.0072395	0.0379939	-2.99573
NUP98	-0.810295	4.70414	-3.38125	0.00724009	0.0379939	-2.81643
SKP1	-0.567366	8.06232	-3.38115	0.0072412	0.0379939	-3.17885
CEP55	-0.734323	5.09838	-3.37898	0.00726731	0.0380916	-2.88703
MRPS16	-0.506672	6.81246	-3.37074	0.00736746	0.0385174	-3.15186
NDUFB7	-0.933162	6.76171	-3.36842	0.00739586	0.0386262	-3.17356
ANKRD52	-0.935917	4.74212	-3.36741	0.00740826	0.0386711	-2.89724
NAGLU	-1.21929	2.49297	-3.36612	0.00742418	0.0386785	-2.47477
PIP4K2C	-0.554443	6.41935	-3.36606	0.00742486	0.0386785	-3.08114
NSFL1C	-0.627978	6.08781	-3.36532	0.00743396	0.0386974	-3.04295
SNX5	-0.554038	7.39707	-3.36503	0.00743761	0.0386974	-3.18244
ATIC	-0.497283	6.7511	-3.36468	0.00744187	0.0386974	-3.15992
TTLL5	-1.03979	3.42121	-3.36454	0.0074437	0.0386974	-2.72324
MFSD3	-0.856433	5.47373	-3.36161	0.00747993	0.038846	-3.07126
MGAT4B	-0.77638	7.37426	-3.35235	0.00759596	0.0393682	-3.23283
CKS2	-0.918883	4.72712	-3.34849	0.00764479	0.0396012	-2.68012
ISCU	-0.834452	6.09636	-3.34656	0.00766938	0.0397084	-2.99948
ABCC5	-0.64893	4.91291	-3.34224	0.00772463	0.0399741	-3.03645
DDX6	-0.448323	8.54104	-3.34163	0.0077324	0.0399939	-3.3264
NSMCE4A	-0.670555	5.88424	-3.33698	0.00779246	0.0401618	-3.08015
HNRNPU	-0.451723	9.12278	-3.33612	0.00780363	0.0401786	-3.35386
ATP5MPL	-0.485747	8.74656	-3.3323	0.00785332	0.0403121	-3.37235
GPAA1	-0.63564	5.78479	-3.33154	0.00786334	0.0403432	-3.14371
RANBP3	-0.715135	4.76359	-3.33085	0.00787236	0.0403691	-2.9549
ATP6V1D	-0.686876	5.469	-3.32965	0.007888	0.0404086	-3.07446
NCOA5	-0.940232	3.81358	-3.32386	0.00796439	0.040718	-2.82721
GTF3C5	-0.729976	6.13194	-3.32096	0.008003	0.0408639	-3.22646
GGCT	-0.487764	7.5478	-3.31866	0.00803367	0.0409222	-3.31734
EXOSC2	-0.859367	4.24096	-3.31779	0.00804535	0.0409222	-2.81567
IDH3B	-0.530419	7.2553	-3.31769	0.00804658	0.0409222	-3.3184
MPP2	-0.895657	3.96484	-3.31712	0.00805421	0.0409222	-2.8639
PPCDC	-0.757743	4.03558	-3.31673	0.00805947	0.0409222	-2.92499
SLC9A6	-0.749893	4.75591	-3.31666	0.00806049	0.0409222	-2.85599
EMP2	-0.52953	6.3288	-3.31665	0.00806062	0.0409222	-3.21121
VAMP3	-0.786708	5.38677	-3.31592	0.00807035	0.0409512	-3.07683
TCERG1	-0.582341	6.23697	-3.31538	0.00807764	0.0409597	-3.15584
LIN7C	-0.75088	5.03689	-3.31491	0.0080839	0.0409597	-2.90381
HNRNPA0	-0.426459	8.16742	-3.3149	0.0080841	0.0409597	-3.36255
PSMC5	-0.442055	7.73761	-3.31314	0.00810777	0.0410151	-3.33247
PRDX3	-0.609816	7.19996	-3.31289	0.00811114	0.0410151	-3.17776
OPA3	-0.956998	3.81667	-3.31192	0.00812434	0.0410614	-2.87598
TMEM138	-0.901835	4.37315	-3.31053	0.00814308	0.0411153	-2.94808
ARPC4	-0.645501	7.54975	-3.30846	0.00817122	0.0412044	-3.33933
AGTRAP	-0.862193	4.50689	-3.30795	0.00817814	0.0412044	-3.02196
ATAD2	-0.595598	5.93179	-3.30769	0.0081817	0.0412044	-3.10179
FAF2	-0.567184	5.85507	-3.3076	0.00818297	0.0412044	-3.11814
ELP6	-0.698313	4.63357	-3.30745	0.00818502	0.0412044	-2.97533
CDCA8	-0.734338	6.17829	-3.30461	0.00822385	0.0413385	-3.22432
SNRNP40	-0.816852	4.39692	-3.30371	0.00823618	0.0413801	-2.80741
COMMD1	-0.763478	4.39007	-3.30088	0.00827503	0.0415548	-2.87849
DGCR6L	-1.03972	3.75497	-3.30016	0.00828508	0.0415743	-2.89115
TMEM63A	-1.19211	3.66517	-3.29522	0.00835351	0.0418043	-2.92661
HDGFL2	-0.834568	6.00279	-3.29493	0.00835757	0.0418043	-3.14676
THYN1	-0.574858	5.89012	-3.2931	0.00838305	0.0418906	-3.19497
OIP5	-0.644526	5.61609	-3.29221	0.00839552	0.0419168	-3.17307
ORC1	-1.05812	3.27629	-3.29214	0.00839654	0.0419168	-2.62991
MAIP1	-1.16317	3.72961	-3.28978	0.00842966	0.0420396	-2.64121
UBE2D4	-1.05432	3.206	-3.28935	0.0084357	0.0420396	-2.63665
E2F2	-0.722607	4.64897	-3.28932	0.00843615	0.0420396	-2.97939
SQLE	-0.874369	4.58082	-3.28921	0.00843765	0.0420396	-2.87066
ZFP41	-1.04008	2.54634	-3.28818	0.00845216	0.0420761	-2.61651
COX6A1	-0.535812	7.15019	-3.28676	0.00847215	0.0421496	-3.31339
NSUN5	-0.599828	6.42521	-3.28519	0.00849442	0.0422045	-3.21339
CNPY2	-0.752302	5.68131	-3.28367	0.00851587	0.0422638	-3.07232
KHSRP	-1.03383	7.8287	-3.28319	0.0085227	0.0422771	-3.36713
SUB1	-0.50807	7.78082	-3.28095	0.0085547	0.0424151	-3.31383
RPS3P6	-1.15666	1.28461	-3.27874	0.00858627	0.0425095	-2.70318
RNF141	-0.455874	7.72785	-3.2771	0.00860979	0.0426053	-3.36034
TRMT2A	-0.82632	4.0622	-3.27287	0.00867076	0.0428445	-3.00018
NDC80	-0.801626	4.97417	-3.27217	0.00868089	0.0428659	-2.98062
NDUFS5	-0.595744	8.57973	-3.2716	0.00868919	0.0428659	-3.43832
MARCKS	-0.669371	5.66018	-3.27105	0.00869708	0.0428659	-3.0877
INCENP	-0.895866	4.44068	-3.27092	0.00869898	0.0428659	-3.06302
UBTF	-0.763257	6.13854	-3.2708	0.00870081	0.0428659	-3.26667
RAB7A	-0.526156	7.94463	-3.27059	0.00870374	0.0428659	-3.3982
NSMCE1	-0.656255	6.55814	-3.27054	0.00870457	0.0428659	-3.32699
HNF4A	-1.01472	2.38003	-3.26893	0.00872791	0.0429601	-2.7297
TRIM28	-0.543793	6.811	-3.2663	0.00876638	0.0431286	-3.27815
ERVMER34-1	-0.974706	4.01882	-3.26257	0.00882108	0.0433557	-2.90424
CTDSPL	-0.558962	6.05689	-3.2611	0.00884278	0.0434202	-3.27876
EPPK1	-0.825813	4.73311	-3.26068	0.00884891	0.0434202	-3.13445
COPZ1	-0.580262	7.17658	-3.25914	0.00887173	0.0434578	-3.3451
RNASEH2C	-0.575744	5.12228	-3.25854	0.00888067	0.0434678	-3.20058
NT5C	-0.690403	5.89735	-3.25843	0.00888231	0.0434678	-3.27847
RFK	-0.522714	6.81699	-3.25736	0.00889811	0.0435103	-3.28721
CINP	-1.00982	4.18559	-3.25727	0.00889955	0.0435103	-2.97478
CYB5A	-0.801398	6.07411	-3.25515	0.00893103	0.0436433	-3.18016
WDR6	-0.566297	6.15355	-3.25439	0.00894237	0.0436777	-3.27857
PPP1R7	-0.647673	5.32561	-3.25399	0.00894844	0.0436793	-3.18617
ARMC7	-0.60664	4.41533	-3.25294	0.00896417	0.0436891	-3.11853
ESS2	-1.41291	2.78773	-3.2528	0.00896615	0.0436891	-2.7184
TPRKB	-0.64278	5.94723	-3.2493	0.00901876	0.0438712	-3.16516
BLOC1S1	-0.761836	4.84458	-3.24917	0.00902077	0.0438712	-3.13038
CCT8	-0.427976	8.8441	-3.24872	0.00902755	0.0438832	-3.49596
SH2B2	-1.35797	2.37052	-3.24738	0.00904773	0.0439323	-2.63152
VPS35	-0.496823	6.70559	-3.24719	0.0090506	0.0439323	-3.32728
HEATR3	-0.750399	4.14135	-3.2435	0.00910664	0.0440782	-2.96701
RARS	-0.478265	7.09871	-3.24102	0.00914438	0.0442188	-3.39664
POLR1B	-0.686024	5.16662	-3.24055	0.00915153	0.0442324	-3.11086
DLGAP5	-0.80289	4.51845	-3.2389	0.00917686	0.0442917	-2.99256
ISOC2	-1.01047	3.54483	-3.23807	0.00918963	0.0443323	-2.85187
TRIM68	-1.45095	2.30769	-3.23765	0.00919614	0.0443427	-2.52554
LMNA	-0.544105	7.68471	-3.23704	0.00920553	0.044367	-3.45674
HCCS	-0.537161	5.76793	-3.23401	0.0092522	0.0445549	-3.2687
TARDBP	-0.601225	5.94861	-3.23394	0.00925328	0.0445549	-3.26739
TGS1	-0.742607	4.48602	-3.2315	0.00929106	0.0446391	-3.01474
EEF1E1	-0.78217	6.08786	-3.23133	0.0092937	0.0446391	-3.23544
PMVK	-0.634172	5.10485	-3.23112	0.00929708	0.0446391	-3.25516
PKMYT1	-1.03417	4.38291	-3.22966	0.00931969	0.0446634	-3.03977
TCHP	-1.04117	3.56891	-3.22854	0.00933718	0.0447262	-2.87307
KIF20B	-0.878524	4.7462	-3.22726	0.00935719	0.0448009	-2.97288
RMND5B	-0.876574	3.7954	-3.22567	0.00938215	0.0448783	-2.98107
ARHGEF39	-0.97975	3.19156	-3.22361	0.0094145	0.0449907	-2.90257
RPS6KB2	-0.926449	6.3823	-3.22189	0.00944171	0.0450784	-3.40975
SAP130	-0.919173	4.82739	-3.21977	0.00947515	0.0452169	-3.1996
METTL7A	-1.19102	2.92861	-3.21829	0.00949864	0.0452653	-2.74845
HMGN2	-1.62372	1.78164	-3.21592	0.00953636	0.0453741	-2.49026
ZNF771	-1.05479	3.38305	-3.21496	0.00955169	0.0453891	-2.91949
EMC3	-0.805277	4.01098	-3.2147	0.00955583	0.0453891	-2.98588
PRPF38A	-0.796476	5.95958	-3.2116	0.00960569	0.0455621	-3.30871
HNRNPH1	-0.511646	8.88825	-3.21102	0.00961486	0.0455844	-3.54105
MFSD12	-0.580983	8.11921	-3.21042	0.00962456	0.0455879	-3.52732
VAMP8	-0.578361	5.76981	-3.20917	0.00964476	0.0456623	-3.29144
ATP2A1-AS1	-1.07154	2.75657	-3.20681	0.0096829	0.0458216	-2.71434
MYCBP	-0.737263	5.28224	-3.20631	0.00969105	0.0458389	-3.26162
BRCA1	-0.969263	4.52009	-3.20571	0.00970071	0.0458632	-3.07424
KIF14	-1.1036	3.60665	-3.20148	0.0097698	0.046147	-2.82568
ZFP36L2	-0.842933	4.39536	-3.19957	0.00980109	0.0462335	-3.05288
NDUFB2	-0.614228	7.49169	-3.19953	0.00980175	0.0462335	-3.51086
YKT6	-0.49192	7.13259	-3.19789	0.00982866	0.0463216	-3.4497
TIGAR	-0.896373	3.61388	-3.19784	0.00982952	0.0463216	-2.96561
ADIPOR2	-0.625709	6.38975	-3.19753	0.00983458	0.046324	-3.36944
PRPF3	-0.84391	5.41751	-3.19537	0.00987015	0.0464486	-3.27614
USP14	-0.756496	5.36891	-3.19377	0.00989662	0.0464917	-3.19723
ADCK2	-0.664795	4.12761	-3.19308	0.00990806	0.0464917	-3.12624
NUDT16	-0.842064	3.86632	-3.19308	0.0099081	0.0464917	-3.09416
CIAO1	-0.669602	4.77972	-3.19289	0.00991129	0.0464917	-3.21361
C19orf25	-0.761407	5.86611	-3.19172	0.00993077	0.0465402	-3.42084
NCAPH2	-0.925613	5.20098	-3.19072	0.00994739	0.0465966	-3.27082
LRRC45	-1.45712	3.40834	-3.18961	0.00996593	0.0466406	-2.94328
KLHL21	-0.990582	4.94408	-3.18865	0.00998194	0.0466726	-3.2389
EIF4E	-0.634147	6.4245	-3.18572	0.0100311	0.0468379	-3.35073
PRPF40A	-0.461796	7.5803	-3.18417	0.0100572	0.0469165	-3.4763
FAM173B	-1.19685	2.77243	-3.18012	0.0101256	0.0471926	-2.75219
CCDC124	-0.705217	5.23787	-3.1792	0.0101413	0.0472443	-3.23923
C2CD2L	-0.66319	4.18106	-3.17852	0.0101529	0.0472765	-3.16595
MAF1	-0.633033	5.81689	-3.17759	0.0101687	0.0473282	-3.35901
CTCF	-0.606715	6.06698	-3.17637	0.0101895	0.0473818	-3.37923
CHPF	-0.597877	7.93815	-3.17547	0.0102048	0.0474314	-3.58419
RSU1	-0.77335	4.31502	-3.17396	0.0102308	0.047513	-3.0362
C1orf109	-1.49605	2.29024	-3.17363	0.0102364	0.047513	-2.65207
SPRYD4	-0.725977	4.40309	-3.17172	0.0102692	0.0475937	-3.21535
IFT46	-0.705115	4.22667	-3.17146	0.0102738	0.0475937	-3.10272
EHMT1	-0.794239	4.81947	-3.17103	0.0102812	0.0475937	-3.24267
FTSJ3	-1.02809	4.35057	-3.17099	0.0102818	0.0475937	-3.06894
MMACHC	-1.00688	2.82438	-3.17051	0.0102901	0.0476105	-2.87539
SFT2D2	-0.671549	5.2993	-3.16945	0.0103084	0.0476499	-3.21019
PSRC1	-0.702852	4.57913	-3.16893	0.0103174	0.0476499	-3.21047
POLR2J	-0.632021	6.63874	-3.16814	0.0103311	0.0476919	-3.48848
EID2	-0.793397	4.42778	-3.1668	0.0103543	0.047777	-3.12449
CLPTM1	-0.728119	4.90388	-3.16516	0.0103829	0.0478874	-3.2689
TIMM8A	-0.700268	4.51576	-3.16099	0.0104558	0.0482018	-3.18314
SDHA	-0.544645	6.00965	-3.16027	0.0104683	0.0482376	-3.43733
TNFAIP8L1	-0.733716	4.94027	-3.15967	0.010479	0.048265	-3.31601
EMC6	-0.495148	8.07461	-3.1586	0.0104978	0.0483152	-3.63112
RTN3	-0.499362	7.07071	-3.15584	0.0105464	0.0484658	-3.49886
ALG3	-0.695019	5.60582	-3.1551	0.0105595	0.0485043	-3.41192
POLE2	-0.901346	3.18908	-3.15215	0.010612	0.0486477	-2.94866
E4F1	-0.859788	4.87723	-3.152	0.0106146	0.0486477	-3.29021
NUP85	-0.540825	6.55432	-3.15044	0.0106424	0.0487089	-3.49516
TMEM203	-1.05984	3.19334	-3.14935	0.010662	0.0487769	-3.01375
SNRPA	-0.866115	7.32605	-3.14743	0.0106963	0.0489118	-3.53612
LAGE3	-0.618956	5.96966	-3.14339	0.0107691	0.0491563	-3.47523
EIF2B1	-0.94486	4.29521	-3.14286	0.0107787	0.049178	-3.0509
ITPRIPL1	-1.2312	3.05605	-3.14093	0.0108137	0.0493158	-2.88738
BORCS6	-0.896026	4.60874	-3.13891	0.0108505	0.0494566	-3.24965
SSB	-0.651667	6.19042	-3.1387	0.0108543	0.0494566	-3.31394
ATP5F1D	-0.58491	6.45304	-3.13674	0.01089	0.0495749	-3.5555
BAG2	-0.665455	5.0229	-3.13329	0.0109534	0.049752	-3.23699
HNRNPL	-0.396533	8.06891	-3.13268	0.0109646	0.0497585	-3.7392
MOSPD3	-0.685751	4.69504	-3.13172	0.0109822	0.0497942	-3.2807
ZNF488	-2.01931	1.76716	-3.1312	0.0109919	0.0498158	-2.63286
TNPO2	-0.714523	6.15104	-3.12923	0.0110282	0.0499462	-3.45141
TBC1D10B	-1.00881	3.38305	-3.1291	0.0110307	0.0499462	-2.95294
HOXB13	-1.02788	3.16874	-3.12602	0.0110879	0.0501394	-3.00477
NOL10	-0.735036	4.81804	-3.1237	0.0111311	0.0502456	-3.28158
UBE2Q1	-0.541952	5.89254	-3.12311	0.0111423	0.0502737	-3.41258
EXT2	-0.747191	5.09882	-3.12121	0.0111779	0.0503498	-3.40235
CEP162	-1.71101	2.31134	-3.11836	0.0112315	0.0505643	-2.76462
NFIC	-0.518785	6.53792	-3.11681	0.0112608	0.0506287	-3.51075
AP3M1	-0.733078	4.56474	-3.11615	0.0112734	0.0506631	-3.2363
TWNK	-0.628843	5.23982	-3.11547	0.0112862	0.0506764	-3.39816
CPNE1	-0.573268	7.12461	-3.1152	0.0112913	0.0506764	-3.60085
RBMX2	-0.593617	5.76484	-3.11387	0.0113166	0.0507677	-3.4479
FASN	-0.605905	8.41776	-3.11077	0.0113758	0.0509658	-3.70238
FASTKD5	-0.66834	5.34194	-3.10838	0.0114215	0.051148	-3.41239
ENOSF1	-0.677237	4.10315	-3.1059	0.0114694	0.0513397	-3.24593
DTL	-1.04112	4.32308	-3.10531	0.0114807	0.0513608	-3.17826
TIMM50	-1.05264	5.36529	-3.10465	0.0114933	0.0513794	-3.43995
FKBP3	-0.591939	6.24105	-3.104	0.0115061	0.0514136	-3.49474
ZNF618	-0.666146	4.6927	-3.10144	0.0115555	0.0515521	-3.28774
PPP2R3C	-0.635281	4.49201	-3.10037	0.0115764	0.0515521	-3.32392
LRRC58	-0.73912	5.14198	-3.09967	0.0115901	0.0515855	-3.38965
NT5C3B	-0.584856	6.57308	-3.09809	0.0116209	0.0516322	-3.57362
EML1	-1.38741	1.95294	-3.09746	0.0116332	0.0516495	-2.83345
KLHL22	-1.01888	4.19515	-3.09737	0.011635	0.0516495	-3.33612
KHDC1	-0.831241	3.3024	-3.09556	0.0116704	0.0517844	-3.12179
PDPK1	-0.681682	4.28889	-3.09325	0.0117159	0.0519409	-3.27526
OGFOD3	-0.474779	6.22103	-3.0927	0.0117268	0.0519664	-3.5735
SSU72	-0.470472	6.75098	-3.09195	0.0117416	0.0520094	-3.585
DFFA	-0.513218	5.96556	-3.09053	0.0117696	0.0521109	-3.56949
SVIP	-0.579723	6.44004	-3.08938	0.0117924	0.0521664	-3.58179
ZNF689	-1.53242	2.97955	-3.08876	0.0118047	0.0521764	-3.02852
CLTA	-0.521953	7.61613	-3.08695	0.0118406	0.0522888	-3.69482
CD81	-0.613924	7.78988	-3.07953	0.0119895	0.0528316	-3.74123
SNRPB2	-0.447603	8.235	-3.07828	0.0120147	0.0528962	-3.76407
KHK	-1.03111	2.0883	-3.07782	0.0120241	0.0528962	-2.98209
FARS2	-0.672559	3.92998	-3.07668	0.0120471	0.0529709	-3.32454
RNF8	-0.670357	5.35564	-3.07602	0.0120605	0.0530066	-3.45139
CPTP	-1.25776	3.34436	-3.07089	0.0121651	0.0533514	-3.13046
TBX3	-0.795405	4.48814	-3.06917	0.0122005	0.0534607	-3.27718
CENPN	-0.749804	5.06295	-3.06827	0.0122189	0.0535094	-3.4357
CCT6A	-0.430095	8.69926	-3.06793	0.012226	0.0535094	-3.76604
C11orf49	-0.784796	4.22557	-3.06786	0.0122274	0.0535094	-3.28331
TBC1D30	-0.801812	3.75672	-3.06602	0.0122653	0.0535832	-3.17794
FAM217B	-0.883522	4.09722	-3.06443	0.0122982	0.0536575	-3.20479
CUL1	-0.563397	5.39825	-3.06377	0.0123118	0.05368	-3.51269
DSC3	-1.21122	2.68946	-3.06315	0.0123247	0.0536987	-2.86085
DDX31	-0.773725	3.64448	-3.06144	0.0123604	0.0537677	-3.1688
KIAA0930	-0.497504	6.81957	-3.05987	0.0123931	0.0538868	-3.68874
ALKBH1	-1.61701	1.70864	-3.05787	0.0124349	0.0539803	-2.70971
UBP1	-0.500557	6.43583	-3.05707	0.0124517	0.0539803	-3.62334
DEPDC1B	-0.803663	4.78146	-3.05578	0.0124788	0.054057	-3.3014
WDR61	-0.757335	5.84566	-3.05455	0.0125046	0.0540945	-3.57186
COPRS	-0.527295	7.41472	-3.05264	0.0125448	0.0542456	-3.72981
THEM4	-0.886266	3.79648	-3.05205	0.0125573	0.0542762	-3.19113
ACSL3	-0.439522	7.25603	-3.05121	0.0125751	0.0543301	-3.7007
PM20D2	-0.846125	4.56678	-3.04776	0.0126485	0.0545726	-3.2469
BCAT2	-0.826396	3.84351	-3.04538	0.0126994	0.0547278	-3.397
MPZL1	-0.526548	5.50556	-3.04495	0.0127086	0.0547338	-3.54436
MT-ATP8	-0.580426	8.67021	-3.04481	0.0127115	0.0547338	-3.85005
NARS	-0.47323	6.98564	-3.04132	0.0127865	0.0550331	-3.71214
OGDH	-0.561096	4.58626	-3.03788	0.0128608	0.0552828	-3.51655
TTLL12	-0.758804	6.27774	-3.03704	0.012879	0.0553133	-3.71325
OXA1L	-0.620005	6.48275	-3.03684	0.0128835	0.0553133	-3.69404
DUS1L	-0.800244	5.89429	-3.03534	0.0129161	0.055427	-3.62205
NMI	-0.9651	3.13878	-3.03429	0.0129389	0.0555014	-3.08351
ARL6IP5	-0.628402	5.17036	-3.03051	0.0130216	0.0557843	-3.47657
MAGOHB	-0.759385	4.28945	-3.03028	0.0130268	0.0557843	-3.37124
ENY2	-0.602838	7.51289	-3.02865	0.0130625	0.0559137	-3.73892
OXLD1	-0.703353	4.86438	-3.02772	0.0130831	0.0559548	-3.54429
ZNF664	-0.460792	6.67847	-3.02612	0.0131183	0.0560313	-3.70204
PRMT7	-1.02099	2.59166	-3.02412	0.0131628	0.0561778	-3.13316
MARVELD3	-0.784832	4.18435	-3.02243	0.0132003	0.0562871	-3.31131
SLC25A39	-0.42423	8.30863	-3.02185	0.0132133	0.0562871	-3.86749
PGS1	-0.716138	4.43317	-3.02162	0.0132183	0.0562871	-3.44901
PIR	-0.693364	4.94124	-3.021	0.0132321	0.0562871	-3.48293
MTCH2	-0.409426	8.37015	-3.02052	0.0132428	0.0562871	-3.87449
GMPR	-0.566043	4.98467	-3.02048	0.0132437	0.0562871	-3.5314
METTL3	-0.693156	4.77119	-3.01836	0.0132912	0.0564417	-3.49671
TIMM44	-0.85757	4.36196	-3.01524	0.0133614	0.0566642	-3.37373
PPP2R1B	-0.696973	4.72006	-3.01509	0.0133648	0.0566642	-3.42771
RXYLT1	-0.805459	3.86165	-3.01476	0.0133721	0.0566642	-3.26487
CHEK2	-0.634553	4.99278	-3.01455	0.013377	0.0566642	-3.55024
RPP25L	-0.511968	5.59788	-3.01342	0.0134024	0.0567045	-3.65454
BTBD6	-0.524732	5.17887	-3.01329	0.0134053	0.0567045	-3.59634
AAR2	-1.13318	4.77965	-3.01305	0.0134108	0.0567045	-3.46719
P2RY11	-0.775243	4.47634	-3.01266	0.0134195	0.0567045	-3.55855
ZBTB24	-0.75781	4.01978	-3.01253	0.0134225	0.0567045	-3.34789
CPLX1	-1.03484	3.13597	-3.01167	0.0134421	0.0567514	-3.13415
HOXA10-AS	-1.09615	2.80495	-3.01135	0.0134493	0.0567579	-3.11269
CRYZ	-0.610567	5.37724	-3.01048	0.013469	0.0568175	-3.51362
SEC23IP	-0.561469	5.99597	-3.00872	0.013509	0.0569157	-3.63431
NOL12	-1.12069	3.10978	-3.00817	0.0135217	0.0569455	-3.21359
TMEM127	-0.647925	4.92251	-3.00746	0.0135379	0.0569904	-3.55474
FXYD3	-0.645968	3.90925	-3.00557	0.0135812	0.0571488	-3.40906
UBE2Z	-0.440285	6.43884	-3.00478	0.0135993	0.0571662	-3.76366
TMEM167A	-0.457573	6.71603	-3.00444	0.0136071	0.0571662	-3.74581
SMIM12	-0.609562	4.99158	-3.00441	0.0136078	0.0571662	-3.55814
IMPDH1	-0.765932	5.2867	-3.00146	0.0136756	0.05738	-3.58251
ATP5F1C	-0.617319	6.69305	-3.00076	0.0136918	0.0574243	-3.69013
CIRBP	-0.396153	8.47425	-3	0.0137094	0.0574746	-3.92388
CDC5L	-0.726319	4.99778	-2.99656	0.0137892	0.0577376	-3.45171
YTHDF2	-0.523331	5.96782	-2.99518	0.0138214	0.057825	-3.68584
TSPAN4	-1.11594	4.78066	-2.99454	0.0138364	0.0578638	-3.58905
EFTUD2	-0.604362	5.68535	-2.99374	0.0138551	0.0579184	-3.62835
TIMM10B	-0.68881	4.29438	-2.99212	0.013893	0.058029	-3.39928
TOP2A	-0.585316	8.49515	-2.99186	0.0138991	0.0580307	-3.91825
POLR2I	-0.581335	6.48516	-2.9882	0.0139851	0.0583182	-3.79035
SLC44A2	-0.603329	5.04061	-2.98749	0.0140019	0.0583404	-3.54983
PEX16	-0.744732	3.43237	-2.98668	0.0140211	0.0583725	-3.36538
CHMP6	-1.02005	3.71479	-2.98616	0.0140335	0.0584003	-3.34942
ACAA1	-0.69896	5.5302	-2.9854	0.0140516	0.058404	-3.7315
THUMPD1	-0.789698	4.99629	-2.98537	0.0140523	0.058404	-3.38343
ARPC5	-0.544439	5.93459	-2.98467	0.0140688	0.058404	-3.65865
PDCD5	-0.57838	6.82488	-2.98387	0.0140878	0.058459	-3.74641
USP22	-0.416471	8.47409	-2.98124	0.0141505	0.058695	-3.90955
CAPZA1	-0.525597	7.23857	-2.98081	0.0141609	0.0587146	-3.78908
C12orf49	-0.599999	5.309	-2.97978	0.0141854	0.0587701	-3.63372
HAS3	-0.632308	4.90867	-2.97952	0.0141917	0.0587701	-3.51045
GALM	-0.689714	4.42009	-2.97826	0.0142219	0.0588712	-3.49657
ATP5PO	-0.375375	9.44149	-2.978	0.0142282	0.0588734	-3.98251
SLC38A5	-0.710507	4.8661	-2.97433	0.0143167	0.0592157	-3.58179
LPCAT3	-0.631889	5.18846	-2.97382	0.0143289	0.0592181	-3.67243
DPAGT1	-0.718519	4.85566	-2.9735	0.0143367	0.059226	-3.60714
SF3A3	-0.623099	6.17834	-2.97192	0.0143752	0.0593236	-3.76713
ZNF688	-1.21465	2.08382	-2.97178	0.0143784	0.0593236	-3.00903
CCNB2	-0.463537	6.53465	-2.97147	0.0143859	0.0593236	-3.81744
TERF2	-0.411698	7.80333	-2.97133	0.0143894	0.0593236	-3.91027
EBAG9	-0.646939	4.92687	-2.96952	0.0144334	0.0594565	-3.48804
DNAJC11	-0.614763	5.24964	-2.96855	0.0144571	0.0595303	-3.69816
CHCHD7	-0.565371	5.3957	-2.96697	0.0144959	0.0596658	-3.67543
SAFB	-0.512993	6.01554	-2.96618	0.0145152	0.0597214	-3.80001
METRN	-0.778221	5.67989	-2.96545	0.0145331	0.0597379	-3.60589
DR1	-0.548512	5.84353	-2.9653	0.0145369	0.0597379	-3.64328
PPHLN1	-0.559117	5.99235	-2.9604	0.0146577	0.0601503	-3.70179
P2RX5	-0.800733	3.22026	-2.96027	0.0146607	0.0601503	-3.3233
LSM10	-0.786801	5.39206	-2.96027	0.0146609	0.0601503	-3.66695
2019-03-09	-0.660403	4.63902	-2.95813	0.0147139	0.0603438	-3.60729
CPT1A	-0.429107	7.77834	-2.95765	0.0147259	0.0603686	-3.94207
TEX261	-0.658898	5.14441	-2.9566	0.014752	0.0604513	-3.66368
SAAL1	-0.543093	6.21668	-2.95478	0.0147975	0.0606132	-3.78562
TWISTNB	-0.612457	5.50292	-2.95372	0.0148241	0.0606977	-3.67418
PPA1	-0.503714	6.70525	-2.95274	0.0148486	0.0607246	-3.78949
MRPS15	-0.596869	5.97586	-2.95199	0.0148675	0.0607777	-3.72974
TTC38	-0.691823	3.74108	-2.9508	0.0148974	0.0608755	-3.44541
CLP1	-1.47518	3.09666	-2.95031	0.0149098	0.0609018	-3.10588
C14orf93	-0.92416	2.75128	-2.94986	0.014921	0.0609229	-3.20451
ECD	-0.759651	4.06266	-2.94932	0.0149346	0.0609542	-3.43439
ZKSCAN3	-0.637469	4.35758	-2.94834	0.0149593	0.0610248	-3.57872
LSM5	-0.701072	6.75537	-2.94564	0.0150279	0.0611984	-3.82241
C7orf43	-1.15441	1.58489	-2.94489	0.015047	0.0612411	-3.1637
GEMIN8	-0.729082	3.48964	-2.94454	0.0150557	0.061252	-3.49028
SGTA	-1.18447	6.99361	-2.94358	0.0150804	0.0613279	-3.88503
UTP20	-1.09359	2.93937	-2.94186	0.0151242	0.061457	-3.12021
TUBG1	-0.670931	6.4524	-2.94132	0.015138	0.0614638	-3.82476
SOGA1	-0.763117	3.87989	-2.93525	0.0152943	0.0619324	-3.50231
ACOX1	-0.483706	5.99275	-2.93488	0.0153039	0.0619324	-3.80103
U2SURP	-0.478747	6.90734	-2.93428	0.0153192	0.0619324	-3.84796
PFDN1	-0.503376	6.09868	-2.93428	0.0153195	0.0619324	-3.86328
NXT1	-0.579137	5.41504	-2.93383	0.0153309	0.0619504	-3.76189
CHDH	-0.843104	3.61491	-2.9327	0.0153604	0.0620048	-3.33223
ERP29	-0.38046	8.09262	-2.93261	0.0153626	0.0620048	-4.01526
SDHAF2	-0.891961	4.96844	-2.93209	0.0153762	0.062035	-3.54048
TMEM258	-0.541775	9.30722	-2.93164	0.0153879	0.0620578	-4.10912
RHOA	-0.399364	9.53967	-2.93106	0.0154029	0.0620934	-4.08455
ARHGAP10	-0.656062	5.23431	-2.93055	0.0154163	0.0621149	-3.67081
C1orf159	-0.852663	3.5226	-2.93039	0.0154204	0.0621149	-3.52425
MAGED1	-0.436941	6.90257	-2.92839	0.0154726	0.0622639	-3.93107
CUEDC1	-0.87339	6.65575	-2.92832	0.0154744	0.0622639	-3.82139
C8orf76	-0.528079	5.40806	-2.92815	0.015479	0.0622639	-3.72639
TTC1	-0.656909	5.95173	-2.92591	0.0155378	0.0623656	-3.82352
DPP3	-0.545758	5.2578	-2.92068	0.0156759	0.0627221	-3.74366
DTD2	-0.69856	4.30232	-2.91816	0.0157428	0.0629058	-3.46571
BAZ1B	-0.48205	6.34336	-2.91799	0.0157473	0.0629058	-3.85437
SHCBP1	-0.745643	4.35973	-2.91487	0.0158308	0.063168	-3.4996
DPH7	-0.607088	5.941	-2.91423	0.0158479	0.0632074	-3.86334
PIP4P1	-0.542937	5.21251	-2.91386	0.0158578	0.0632074	-3.7779
DHRS7B	-0.656095	4.25631	-2.9138	0.0158593	0.0632074	-3.57163
CYB561D2	-1.02922	2.61345	-2.91308	0.0158787	0.0632105	-3.20073
NACC2	-0.577058	4.91361	-2.9125	0.0158942	0.0632475	-3.64222
NMNAT1	-0.837182	3.36925	-2.91082	0.0159395	0.0633717	-3.38005
STUB1	-0.550282	5.99038	-2.91065	0.0159441	0.0633717	-3.83619
TPM3	-0.564441	6.93539	-2.90884	0.0159929	0.0634667	-3.94982
SLC29A1	-0.512442	6.01535	-2.90751	0.016029	0.0635601	-3.8206
KATNB1	-0.694596	4.6753	-2.90657	0.0160544	0.0636116	-3.74067
ERAL1	-0.855137	3.59395	-2.90552	0.0160832	0.0636745	-3.33286
GTSE1	-0.887344	4.06069	-2.90231	0.0161707	0.063898	-3.52152
PLPBP	-0.779903	4.35318	-2.90167	0.0161882	0.0639426	-3.39449
SLC7A2	-1.5378	1.80261	-2.90052	0.0162197	0.0639992	-2.99357
MRPL9	-0.608766	5.52017	-2.89829	0.0162812	0.0641854	-3.84952
MIPEP	-0.730943	4.5154	-2.89738	0.0163061	0.0642486	-3.62103
ZWILCH	-0.607923	6.35908	-2.89609	0.0163418	0.0643244	-3.92656
GSTO1	-0.376882	8.37553	-2.89245	0.0164429	0.0645728	-4.10836
DDX27	-0.451645	6.16457	-2.89167	0.0164647	0.0646084	-3.92137
PCYT1A	-0.496315	5.50938	-2.8886	0.0165504	0.0648945	-3.82398
TBCA	-0.453413	8.38593	-2.88459	0.0166633	0.0652617	-4.06046
CMSS1	-0.47226	6.00756	-2.88381	0.0166853	0.0652899	-3.86948
SLC25A11	-0.561818	6.49913	-2.88222	0.0167302	0.0654044	-3.97
WDR20	-0.80564	3.72588	-2.88216	0.0167318	0.0654044	-3.43272
SKA3	-0.790551	4.78774	-2.87842	0.0168381	0.0656938	-3.66822
NBEAL2	-0.780596	3.89178	-2.87808	0.0168477	0.0657061	-3.70381
COX19	-0.469431	5.61717	-2.87768	0.0168591	0.0657196	-3.90396
MELK	-0.61732	5.57704	-2.87751	0.0168641	0.0657196	-3.81966
PARS2	-1.18209	2.69164	-2.87701	0.0168783	0.06575	-3.27961
RHBDD2	-0.668714	5.29981	-2.87462	0.0169469	0.0659161	-3.81255
SF3B2	-0.452835	7.36934	-2.87417	0.0169598	0.065941	-4.0399
FAM192A	-0.449966	6.09013	-2.87204	0.0170211	0.066154	-3.9519
RBM45	-0.894071	3.44927	-2.87164	0.0170326	0.0661601	-3.47518
PARP2	-0.745621	4.45176	-2.86524	0.0172183	0.0667424	-3.617
LARP1	-0.46937	6.23152	-2.86493	0.0172272	0.0667513	-3.9131
TSEN54	-0.52647	6.1015	-2.86443	0.017242	0.0667833	-3.96711
MBD2	-0.591182	5.24709	-2.86403	0.0172536	0.0668029	-3.71324
TMBIM6	-0.514905	8.37669	-2.86127	0.0173343	0.0670899	-4.09975
SPECC1L	-0.677952	4.78927	-2.85803	0.0174297	0.0673566	-3.78682
GNAI2	-0.789933	6.75265	-2.85554	0.0175037	0.0675667	-4.01892
WDR92	-1.03168	3.72147	-2.85552	0.017504	0.0675667	-3.45339
ALDH16A1	-1.09396	4.31011	-2.85484	0.0175244	0.0676196	-3.56766
PTBP1	-0.363002	8.65053	-2.8544	0.0175374	0.0676444	-4.1839
CPSF4	-0.516742	5.67953	-2.85101	0.0176384	0.0679566	-3.92221
MRPL48	-0.582406	5.54965	-2.85067	0.0176486	0.0679627	-3.86783
PSME2	-0.574508	5.65018	-2.85029	0.01766	0.0679627	-3.86457
CALM3	-0.359433	9.52187	-2.84785	0.017733	0.0681499	-4.20979
DHRSX	-1.11011	2.3402	-2.84777	0.0177355	0.0681499	-3.29849
BMS1	-0.413389	7.59451	-2.84675	0.0177662	0.0681997	-4.12202
TBRG4	-0.471779	6.03995	-2.84667	0.0177685	0.0681997	-4.0146
UBE2M	-0.658985	5.75989	-2.84617	0.0177837	0.0682323	-3.95059
SLC37A4	-0.678299	5.38925	-2.84514	0.0178148	0.0683	-3.84145
COX18	-0.781388	3.69475	-2.84336	0.0178685	0.0684582	-3.52568
MAD2L1	-0.589962	5.86948	-2.84327	0.0178712	0.0684582	-3.85188
POGLUT1	-0.865646	3.15915	-2.84296	0.0178808	0.0684582	-3.4799
SLC30A6	-0.661974	4.31631	-2.84288	0.0178829	0.0684582	-3.64854
YJU2	-1.28176	3.43581	-2.84237	0.0178985	0.0684919	-3.51637
COX11	-0.762824	4.42145	-2.84017	0.0179654	0.0687118	-3.60012
CDC123	-0.526183	7.01073	-2.84004	0.0179694	0.0687118	-4.07528
HACD2	-1.14341	4.75908	-2.83912	0.0179973	0.0687926	-3.58265
MDM1	-1.70692	1.90398	-2.83618	0.0180874	0.0691109	-3.01169
DGKG	-1.18089	2.27915	-2.83592	0.0180954	0.0691156	-3.25525
CNNM3	-0.853577	3.621	-2.83485	0.0181281	0.0692143	-3.59139
NLE1	-0.55894	4.61288	-2.83395	0.0181557	0.0692678	-3.85281
DOLPP1	-0.582638	4.93519	-2.83362	0.018166	0.0692814	-3.85929
UTP18	-0.579341	5.53217	-2.83179	0.0182224	0.0693922	-3.92865
SACM1L	-0.677375	6.02157	-2.83005	0.0182762	0.0695711	-3.97385
NDUFS8	-0.481789	6.08396	-2.8298	0.0182839	0.0695746	-3.98302
ZNF207	-0.466012	6.6757	-2.82921	0.0183021	0.0696178	-4.01741
HSPB1	-0.715148	8.60335	-2.82843	0.0183266	0.0696634	-4.15702
FLVCR1-DT	-1.10641	2.33773	-2.82839	0.0183278	0.0696634	-3.2534
HSPBAP1	-1.24326	2.17594	-2.82416	0.0184596	0.0700337	-3.25848
CUEDC2	-0.611748	4.5694	-2.82156	0.0185412	0.0703172	-3.79714
RBMX	-0.472162	6.30066	-2.81889	0.0186252	0.0705829	-3.97866
RPRD2	-0.550407	4.68721	-2.81703	0.018684	0.0707796	-3.81973
CKS1B	-0.410304	7.55642	-2.81639	0.0187043	0.0708298	-4.16021
EIF3I	-0.464655	6.69065	-2.81553	0.0187315	0.0708586	-4.02059
NUFIP1	-0.885384	3.31263	-2.81541	0.0187354	0.0708586	-3.42561
POR	-0.616354	5.87721	-2.81338	0.0188	0.0710367	-4.02447
ASL	-0.691557	3.74694	-2.81336	0.0188008	0.0710367	-3.71082
GTPBP4	-0.498971	6.82662	-2.81157	0.0188578	0.0711993	-4.07796
FSCN1	-0.509997	8.8134	-2.81129	0.0188667	0.0712064	-4.20921
AKT2	-0.759769	8.68383	-2.80882	0.0189459	0.0713996	-4.26768
VPS18	-0.547157	4.56215	-2.8074	0.0189918	0.0714742	-3.86326
LTV1	-0.829042	4.4317	-2.80733	0.0189938	0.0714742	-3.57701
MRPL16	-0.598857	5.29188	-2.80689	0.019008	0.0714826	-3.85506
TYMS	-0.541683	7.09129	-2.80679	0.0190113	0.0714826	-4.11276
RNF20	-0.458422	5.69035	-2.80661	0.0190171	0.0714826	-3.99609
RBFA	-0.43258	5.89403	-2.80608	0.0190343	0.0715208	-4.06461
VAC14	-0.93499	3.14706	-2.80546	0.0190544	0.0715529	-3.47586
DBF4	-0.956766	3.49285	-2.80438	0.0190893	0.0716484	-3.43403
KAT2A	-0.534241	5.05132	-2.80368	0.019112	0.0717069	-3.95537
PQBP1	-0.616127	4.52485	-2.80304	0.0191326	0.0717577	-3.84091
OTUD6B	-0.694706	4.49027	-2.80258	0.0191475	0.0717871	-3.73246
TCTEX1D2	-1.65502	2.4663	-2.80013	0.0192273	0.0720334	-3.21899
PWP1	-0.530399	6.32883	-2.7999	0.0192348	0.0720351	-4.04273
BORCS8	-1.04404	3.72677	-2.79669	0.0193399	0.0723753	-3.60478
LIG1	-0.465686	5.63225	-2.7961	0.019359	0.0724202	-4.04038
TMEM115	-1.30525	3.6046	-2.7952	0.0193887	0.0725046	-3.55399
DICER1	-0.907107	3.79204	-2.7936	0.0194413	0.0726747	-3.50699
KIF26A	-0.629308	4.23864	-2.79308	0.0194584	0.072712	-3.93309
NFIA	-0.726953	4.6779	-2.79218	0.0194882	0.0727704	-3.87728
SS18L2	-0.592212	5.8518	-2.7917	0.0195043	0.072803	-3.96017
TOR3A	-0.572183	4.95456	-2.78986	0.0195651	0.0730034	-3.98011
DKC1	-0.396139	7.64691	-2.78958	0.0195745	0.0730116	-4.19946
RFXANK	-0.537794	4.4598	-2.78655	0.0196753	0.0732533	-3.92311
AIFM2	-0.472596	5.92878	-2.78525	0.0197189	0.0733888	-4.05886
CACTIN	-0.883589	3.565	-2.78457	0.0197414	0.0734207	-3.4647
MIB2	-0.914939	5.15028	-2.78456	0.0197419	0.0734207	-3.93884
EIF2B5	-0.411434	6.50125	-2.78411	0.0197567	0.0734491	-4.18502
HSBP1	-0.37276	8.92053	-2.78304	0.0197926	0.0735557	-4.29101
SETDB2	-1.19546	2.07429	-2.78252	0.0198101	0.0735937	-3.23971
APOO	-0.894974	3.74785	-2.7815	0.0198445	0.0736677	-3.53044
KIF2C	-0.445944	5.90982	-2.78044	0.0198804	0.0737742	-4.08821
LRRC47	-0.557222	7.65146	-2.77838	0.0199498	0.07388	-4.2215
CDK12	-0.542546	4.81884	-2.77837	0.0199503	0.07388	-3.90583
MINPP1	-0.742852	4.56165	-2.7783	0.0199525	0.07388	-3.61474
POMT2	-0.717384	5.8764	-2.77807	0.0199603	0.0738822	-4.03567
EIF5	-0.457713	7.07706	-2.77763	0.0199751	0.0739102	-4.15092
LAMA2	-1.35005	2.00854	-2.77706	0.0199945	0.0739453	-3.27776
METTL26	-0.580541	4.50663	-2.77693	0.0199991	0.0739453	-3.94328
RRP1	-0.657295	4.82255	-2.77637	0.0200182	0.0739887	-3.98816
PPOX	-0.704583	3.84432	-2.77561	0.0200437	0.0740372	-3.6897
SURF2	-0.586344	4.93887	-2.7752	0.0200576	0.0740372	-3.97889
SPRTN	-0.978706	3.21898	-2.77493	0.0200668	0.0740372	-3.39915
METAP2	-0.45542	8.4825	-2.77469	0.0200751	0.0740372	-4.30132
FAM222A	-1.01857	2.29312	-2.77454	0.0200803	0.0740372	-3.38723
NENF	-0.455383	6.71728	-2.7744	0.0200852	0.0740372	-4.14124
SYNE4	-0.537996	4.72522	-2.77367	0.0201099	0.0740858	-3.95334
TP73	-0.848778	4.04495	-2.77043	0.0202207	0.0743861	-3.74454
NOP10	-0.505381	7.18385	-2.7697	0.0202457	0.0744028	-4.18292
SRSF1	-0.824918	8.16669	-2.76918	0.0202638	0.0744371	-4.30118
REXO2	-0.499398	5.85896	-2.76855	0.0202855	0.0744898	-4.0291
RBBP9	-0.903271	3.27072	-2.76652	0.0203552	0.0746651	-3.47661
NFATC3	-0.675916	3.99407	-2.76603	0.0203724	0.0747013	-3.77014
RAB3IL1	-1.3712	2.42305	-2.76571	0.0203832	0.0747138	-3.44509
TOMM22	-0.554169	8.16027	-2.76297	0.0204783	0.0749235	-4.3085
NRBP1	-0.854025	6.80683	-2.76279	0.0204845	0.0749235	-4.1786
MRPS28	-0.767272	4.73807	-2.76203	0.0205111	0.0749937	-3.80661
AP1G1	-0.454994	5.97579	-2.76162	0.0205254	0.0750191	-4.08395
PEX11B	-0.599994	4.34567	-2.76057	0.020562	0.0750989	-3.87716
HNRNPD	-0.482489	8.01672	-2.75956	0.0205972	0.0752005	-4.25192
GTSF1	-0.41571	7.18754	-2.75769	0.0206627	0.0753922	-4.20342
MUTYH	-0.641774	3.91628	-2.75752	0.0206687	0.0753922	-3.79607
NUDT8	-0.8394	2.15964	-2.75725	0.0206781	0.0753922	-3.5677
WDR7	-0.978133	2.64374	-2.75484	0.020763	0.0755887	-3.42074
TTC12	-1.0378	2.8567	-2.75341	0.0208131	0.0756901	-3.46509
NECTIN1	-0.601525	4.60781	-2.75092	0.0209014	0.0758215	-3.85979
RUNX2	-1.35932	2.26326	-2.75053	0.0209152	0.0758446	-3.30645
MOB4	-0.498796	6.58462	-2.74755	0.0210213	0.0761515	-4.1634
NR1H3	-1.02906	3.30945	-2.74752	0.0210223	0.0761515	-3.72809
COTL1	-0.349275	8.70171	-2.74692	0.0210439	0.0761756	-4.3822
RFWD3	-0.512808	5.90172	-2.74499	0.0211128	0.0763706	-4.03301
CANT1	-0.480613	6.22013	-2.74402	0.0211476	0.0764424	-4.1926
MSH6	-0.522742	5.51555	-2.74352	0.0211654	0.0764793	-4.00681
F12	-0.550863	5.60675	-2.74006	0.0212903	0.0768215	-4.13656
AGPAT3	-0.487523	5.08607	-2.73962	0.0213062	0.0768303	-4.05831
REEP1	-1.14279	2.46666	-2.73957	0.0213078	0.0768303	-3.3468
PBK	-0.562283	5.33034	-2.73854	0.021345	0.07691	-4.00991
MRPL58	-0.599843	6.1852	-2.7373	0.02139	0.0769903	-4.14947
C12orf57	-0.389506	7.58887	-2.737	0.0214009	0.0770023	-4.32021
CHTF18	-0.64232	4.71976	-2.73527	0.021464	0.0771853	-4.07092
NDUFAF4	-0.608385	5.09143	-2.73375	0.0215196	0.0773473	-3.9392
CSKMT	-0.737708	4.17532	-2.73202	0.0215826	0.0774892	-3.75439
PAF1	-0.503776	5.16905	-2.73183	0.0215895	0.0774892	-4.09232
NXT2	-0.881085	4.37302	-2.73099	0.0216204	0.0775726	-3.72762
PDAP1	-0.383136	7.37671	-2.73069	0.0216314	0.0775848	-4.33458
MPV17L2	-0.839089	3.35888	-2.73038	0.021643	0.0775991	-3.63085
TXLNG	-0.586669	4.67684	-2.72743	0.0217516	0.0778789	-3.91586
IPO11	-0.89622	3.72276	-2.72714	0.021762	0.0778887	-3.57235
CAVIN1	-0.6074	7.13334	-2.72648	0.0217864	0.0779488	-4.30542
LDAH	-0.573746	4.49464	-2.72599	0.0218048	0.0779872	-3.94741
CDC42	-0.403581	7.44611	-2.72545	0.0218247	0.0780307	-4.25068
CYP26B1	-0.887787	3.99849	-2.72485	0.0218469	0.0780828	-3.68901
CWF19L1	-1.19658	3.45441	-2.72437	0.0218648	0.0781193	-3.53919
MED19	-0.58494	4.9875	-2.7231	0.021912	0.0782478	-4.01178
NUP88	-0.73781	4.70668	-2.72219	0.0219459	0.0782682	-3.95613
HIF1AN	-0.426234	6.81517	-2.72061	0.0220047	0.078399	-4.28499
PBDC1	-0.635979	5.67731	-2.71864	0.0220783	0.0786062	-4.03557
NONO	-0.437873	8.12865	-2.7168	0.0221477	0.0788256	-4.28671
PWWP2B	-0.820041	3.68433	-2.71448	0.0222349	0.078998	-3.82562
KPNA1	-0.553571	4.83468	-2.71173	0.0223388	0.0793395	-3.98529
MRPL13	-0.458118	6.89666	-2.711	0.0223666	0.0793826	-4.23906
RRP15	-0.657312	4.79782	-2.70912	0.0224383	0.0795817	-3.89445
GSTM4	-0.840272	4.18427	-2.7089	0.0224466	0.0795834	-3.96732
NOL7	-0.489398	6.61841	-2.7076	0.0224961	0.0796803	-4.21355
MNX1-AS1	-1.11771	2.18087	-2.70736	0.0225052	0.0796803	-3.44424
TSPYL1	-0.528963	5.63604	-2.70452	0.0226141	0.0799824	-4.07132
CNPY3	-0.727361	4.50505	-2.70353	0.0226521	0.0800611	-3.97154
BUB1B	-0.574393	4.92233	-2.70314	0.0226671	0.0800862	-3.93129
CEBPA	-1.04638	3.97376	-2.70189	0.0227154	0.0801458	-3.88071
SRC	-0.553397	4.51404	-2.70138	0.0227348	0.0801584	-4.00018
TYW3	-0.711831	4.99954	-2.6963	0.0229318	0.0807836	-4.04237
UBE2A	-0.590264	5.51125	-2.6956	0.0229591	0.0808374	-4.09565
FECH	-0.685662	4.56932	-2.69531	0.0229703	0.0808489	-3.89012
C1QTNF1	-0.769518	3.07799	-2.69404	0.02302	0.0809287	-3.84153
OSCP1	-0.82357	2.77439	-2.69392	0.0230248	0.0809287	-3.64939
KIF11	-1.02581	3.53391	-2.69105	0.0231373	0.0812267	-3.62108
MIEN1	-0.610172	5.95155	-2.69074	0.0231495	0.0812267	-4.20345
MRRF	-0.468415	5.79346	-2.68905	0.023216	0.081404	-4.21186
UGDH	-0.483082	6.44292	-2.68868	0.0232305	0.0814266	-4.24759
CYB5D2	-0.630033	4.42337	-2.6867	0.0233086	0.081588	-3.98582
PSME1	-0.494005	7.00436	-2.68614	0.0233307	0.0816373	-4.31
ZNF3	-0.535761	4.96186	-2.68447	0.0233973	0.081778	-4.05226
JRK	-0.768852	2.73513	-2.68432	0.023403	0.081778	-3.73505
PPA2	-0.495745	5.79456	-2.68181	0.0235031	0.0820151	-4.11505
ODC1	-0.580912	8.61055	-2.67794	0.0236581	0.0823968	-4.46368
UQCRC1	-0.393293	6.50402	-2.67786	0.0236611	0.0823968	-4.31351
SHQ1	-0.739116	4.86158	-2.6771	0.0236915	0.0824747	-4.01134
MTRF1L	-0.827238	3.33807	-2.67525	0.0237664	0.0826787	-3.74326
HSPA9	-0.404097	7.06531	-2.67438	0.0238014	0.0827406	-4.35192
NDUFB6	-0.646606	5.59412	-2.67401	0.0238164	0.0827406	-4.08386
SLC18B1	-0.527128	5.09335	-2.67388	0.0238216	0.0827406	-4.10069
FADS1	-0.615989	4.5318	-2.67381	0.0238244	0.0827406	-3.90073
ENOPH1	-0.615776	5.62214	-2.67328	0.0238458	0.0827406	-4.10166
ACTL6A	-0.639509	4.50056	-2.6732	0.0238492	0.0827406	-3.86662
GSK3A	-0.841325	4.85331	-2.67211	0.0238932	0.0828085	-4.04814
PHF23	-0.617891	5.52331	-2.67088	0.0239434	0.0828961	-4.19851
CCT4	-0.386633	8.79898	-2.67034	0.0239654	0.0828961	-4.47533
RAB8A	-0.485465	5.38361	-2.66965	0.0239932	0.0829299	-4.15121
MREG	-1.31496	2.53639	-2.66965	0.0239934	0.0829299	-3.42041
MOCS3	-0.985527	2.67711	-2.66835	0.0240464	0.0830775	-3.53698
RPL35AP21	-0.790317	3.52866	-2.6682	0.0240524	0.0830775	-3.94342
MVB12A	-0.850418	6.20798	-2.66756	0.0240786	0.0831399	-4.33097
GPN2	-0.753886	4.04151	-2.667	0.0241014	0.0831901	-3.9548
ERG28	-0.513225	5.4679	-2.66665	0.024116	0.0831968	-4.19276
TMEM14A	-0.53715	6.77502	-2.66656	0.0241196	0.0831968	-4.21807
ZNF407	-1.18871	2.44418	-2.66567	0.0241561	0.0832184	-3.46942
DAZAP2	-0.411058	7.96797	-2.66561	0.0241586	0.0832184	-4.40811
PTP4A1	-0.323003	9.45758	-2.66299	0.024266	0.0835037	-4.54155
GATA2-AS1	-1.21724	2.0624	-2.66057	0.024366	0.0837627	-3.52976
DAP3	-0.393647	7.01524	-2.65964	0.0244047	0.0838604	-4.34048
CCNY	-0.40199	6.425	-2.65689	0.0245189	0.0842031	-4.34094
CDCA2	-0.833529	4.34952	-2.65405	0.0246372	0.0845807	-3.98822
UBN1	-0.439656	6.81156	-2.65367	0.0246534	0.0846078	-4.37311
ZNF480	-0.472714	5.0602	-2.65173	0.0247347	0.0848108	-4.20402
ABHD14A	-0.842825	2.72462	-2.65166	0.0247375	0.0848108	-3.74924
PLEKHJ1	-0.626498	5.51712	-2.64989	0.024812	0.0849803	-4.25697
THOC7	-0.69869	5.41906	-2.64966	0.0248215	0.0849841	-4.06801
ATP6V1F	-0.578571	7.29046	-2.64916	0.0248426	0.0850278	-4.42228
MVB12B	-0.806755	3.28497	-2.64827	0.0248801	0.0850991	-3.8068
ANAPC5	-0.462371	6.59539	-2.64735	0.024919	0.0851284	-4.34419
VPS35L	-0.722719	3.97636	-2.64698	0.0249347	0.0851284	-3.95445
ATP6V0E1	-0.381118	7.29731	-2.64689	0.0249389	0.0851284	-4.42332
LBR	-0.453624	6.49446	-2.64456	0.0250374	0.0853964	-4.35894
DGCR8	-0.736283	4.03791	-2.64444	0.0250426	0.0853964	-4.03954
G3BP2	-0.447783	6.53519	-2.64424	0.025051	0.0853964	-4.33067
SRSF11	-0.378577	7.88484	-2.64352	0.0250818	0.0854444	-4.44326
DBN1	-0.366979	6.77891	-2.63882	0.0252828	0.0860681	-4.43809
PXMP4	-0.710396	3.42056	-2.6387	0.0252877	0.0860681	-3.89716
ETHE1	-0.652843	6.04185	-2.63834	0.0253035	0.0860681	-4.34598
SUOX	-1.08384	4.07617	-2.6382	0.0253096	0.0860681	-3.86802
MCMBP	-0.617719	5.25034	-2.63746	0.025341	0.0860681	-4.09688
ALDH4A1	-0.761457	4.68868	-2.63633	0.0253898	0.0861476	-4.16613
ATP5ME	-0.477922	9.39365	-2.63508	0.0254437	0.0862444	-4.62536
HEATR1	-0.566125	5.71379	-2.633	0.0255337	0.0864543	-4.30865
STXBP4	-0.738774	3.74721	-2.6329	0.0255384	0.0864543	-3.86066
H1FX	-0.711573	7.4283	-2.62806	0.0257489	0.0871047	-4.45766
MIS18A	-0.497372	5.66105	-2.62758	0.02577	0.087147	-4.24833
EIPR1	-0.47532	5.33295	-2.6264	0.0258215	0.0872634	-4.21213
NCAPG	-0.464074	6.35825	-2.62604	0.0258372	0.0872737	-4.31846
TTI1	-0.619596	4.09757	-2.62594	0.0258417	0.0872737	-4.04236
GLRX3	-0.526519	5.20139	-2.62529	0.0258705	0.0873359	-4.17055
VKORC1L1	-0.615624	4.50816	-2.62513	0.0258775	0.0873359	-4.05114
EDC3	-0.820298	3.82717	-2.62494	0.0258859	0.0873359	-3.98424
LRIF1	-0.479854	5.49045	-2.62461	0.0259	0.0873547	-4.23196
GMDS	-0.511893	6.01051	-2.62409	0.025923	0.0874033	-4.34721
DNAAF5	-0.673144	4.85607	-2.62384	0.0259341	0.087408	-4.10542
TSSK6	-1.36534	1.97244	-2.62367	0.0259416	0.087408	-3.56075
SHARPIN	-0.727212	3.95627	-2.62281	0.0259793	0.0875012	-4.04814
SMC1A	-0.443095	6.14444	-2.62265	0.0259864	0.0875012	-4.34151
TTI2	-0.828111	3.70386	-2.62173	0.0260274	0.0875546	-3.90064
CD151	-0.547541	6.41754	-2.62167	0.0260298	0.0875546	-4.3827
POLE	-0.656186	4.59288	-2.62057	0.0260786	0.0876666	-4.10834
IQCK	-1.09709	2.83114	-2.62029	0.0260907	0.0876782	-3.56245
OXCT1	-0.749197	4.07301	-2.6199	0.0261082	0.0877081	-3.9839
RITA1	-0.552777	5.03039	-2.61895	0.0261502	0.0878201	-4.27284
SDF4	-0.485091	7.47127	-2.61856	0.0261676	0.0878496	-4.50793
PHKG2	-0.97564	2.80272	-2.61503	0.0263251	0.0882328	-3.76552
JTB	-0.392487	7.91068	-2.61204	0.026459	0.0885942	-4.51408
KNSTRN	-0.55541	5.72701	-2.61173	0.0264731	0.088612	-4.26043
NT5DC2	-0.67249	5.53861	-2.61069	0.0265196	0.0887001	-4.3365
GNPTAB	-0.646856	4.67169	-2.61056	0.0265255	0.0887001	-3.99498
HAT1	-0.799646	5.0347	-2.6069	0.0266907	0.0891645	-4.11332
CCDC88B	-0.705356	3.73031	-2.60615	0.026725	0.0892499	-4.04391
SRRD	-0.625192	4.33995	-2.60559	0.0267501	0.089301	-4.05802
MICALL1	-0.783686	3.24679	-2.60389	0.0268274	0.0894451	-3.90943
SUV39H1	-1.21872	2.38121	-2.60271	0.0268812	0.089571	-3.55815
ESPL1	-0.683565	3.95504	-2.60237	0.0268967	0.089571	-3.99396
XPO7	-0.596201	5.9058	-2.60178	0.0269238	0.0896197	-4.30587
TXNL4B	-0.891547	3.1913	-2.59865	0.0270672	0.0899838	-3.85054
FAM53B	-0.504582	4.80414	-2.59862	0.0270685	0.0899838	-4.29106
SHPK	-1.31368	2.75427	-2.59776	0.0271084	0.0899922	-3.69843
UTP3	-0.435484	6.05142	-2.59652	0.0271656	0.0901221	-4.33349
MTMR14	-0.626288	4.43129	-2.59616	0.0271821	0.090126	-4.09005
KLRA1P	-1.37096	2.22626	-2.59421	0.027272	0.0902631	-3.54295
ZNF524	-0.776659	3.02918	-2.59402	0.027281	0.0902631	-3.96025
CKB	-0.458686	8.86816	-2.59331	0.0273139	0.0903275	-4.64898
LIN9	-1.2179	2.29036	-2.59296	0.02733	0.0903287	-3.57173
DMAC2	-0.483286	4.8735	-2.59159	0.0273939	0.0905039	-4.25203
BCCIP	-0.482273	6.4706	-2.59049	0.0274447	0.0906424	-4.36765
DMAP1	-0.872812	3.39528	-2.59007	0.0274643	0.0906776	-4.0171
SNHG1	-0.579772	8.53088	-2.58898	0.0275155	0.0908171	-4.57402
CLCN7	-0.912156	4.33058	-2.58693	0.0276113	0.0910744	-4.18442
SPOUT1	-0.596016	5.43753	-2.5867	0.0276222	0.0910754	-4.36377
SNRNP48	-0.51931	5.55737	-2.58654	0.0276295	0.0910754	-4.27785
SDC1	-0.497986	5.80184	-2.58389	0.0277543	0.0913684	-4.4335
NOL8	-0.784223	4.04208	-2.58154	0.0278653	0.0916746	-4.00507
RBM22	-0.490006	6.28037	-2.58065	0.0279072	0.0917826	-4.37648
CXXC1	-0.583941	6.17167	-2.5783	0.0280188	0.0920715	-4.45871
CDC45	-0.603809	4.2646	-2.57823	0.0280221	0.0920715	-4.18658
THNSL1	-0.730438	3.34295	-2.57752	0.0280557	0.0921521	-3.93011
MVP	-0.851671	4.56255	-2.57676	0.0280922	0.0922123	-4.22723
MBNL1	-0.427932	6.55995	-2.57503	0.0281748	0.0923345	-4.41062
MCTS1	-0.427272	6.67775	-2.57266	0.0282882	0.0926466	-4.46349
BAIAP2	-0.80859	5.07975	-2.56866	0.0284812	0.0931613	-4.32065
SLC16A10	-1.03618	2.70918	-2.56864	0.028482	0.0931613	-3.67123
USP19	-0.468254	5.36348	-2.56789	0.0285182	0.0931726	-4.37219
GLO1	-0.39933	7.60783	-2.56781	0.028522	0.0931726	-4.53634
PCNT	-0.593926	4.00781	-2.56648	0.0285865	0.0932933	-4.1244
NTMT1	-0.420384	6.24931	-2.56529	0.0286444	0.0933921	-4.52737
TMEM179B	-0.434593	6.64919	-2.56521	0.0286484	0.0933921	-4.49586
MPDU1	-0.546589	5.79239	-2.56508	0.0286546	0.0933921	-4.40662
RACGAP1	-0.740736	4.33506	-2.56498	0.0286596	0.0933921	-3.99591
IFT22	-1.05586	3.70784	-2.56242	0.0287845	0.0936692	-3.94212
ZNF263	-0.688105	4.4017	-2.56137	0.0288357	0.0937187	-4.11042
BRD9	-0.500379	5.68706	-2.56135	0.0288365	0.0937187	-4.43675
CDCA3	-0.664527	5.48994	-2.55859	0.0289721	0.0940394	-4.31519
TMX4	-0.865199	3.32785	-2.55765	0.0290182	0.0941289	-3.86304
NAT14	-0.427989	6.21182	-2.55503	0.0291477	0.0944886	-4.54177
PDSS2	-0.611126	4.10151	-2.55389	0.0292042	0.0946241	-4.11427
PSMC2	-0.58962	6.04621	-2.55359	0.0292189	0.0946291	-4.40126
HYI	-0.931409	3.44608	-2.55196	0.0293001	0.0947641	-4.08213
SLC52A2	-0.542975	6.06778	-2.55194	0.0293007	0.0947641	-4.50056
NADK2	-0.511841	4.54168	-2.55155	0.0293201	0.0947641	-4.2369
MAT2A	-0.504752	6.80008	-2.55111	0.0293424	0.0947641	-4.60055
SSBP3	-0.42549	6.09772	-2.55105	0.0293452	0.0947641	-4.40211
INSIG1	-1.19373	3.30592	-2.55095	0.0293502	0.0947641	-3.87053
SIRT1	-0.837473	3.69761	-2.55088	0.0293537	0.0947641	-3.9939
BRIP1	-0.734879	4.27997	-2.55007	0.0293941	0.0948201	-4.0274
COMMD10	-0.654884	4.11085	-2.54923	0.0294362	0.0948977	-4.07254
GIT2	-0.650519	3.95308	-2.5491	0.0294426	0.0948977	-4.02814
MEN1	-0.625808	6.99702	-2.54893	0.029451	0.0948977	-4.52059
MPST	-1.02509	6.46067	-2.54797	0.0294988	0.0950041	-4.547
FOCAD	-0.464202	5.44294	-2.54664	0.0295657	0.0951469	-4.37461
H2AFV	-0.360199	8.59714	-2.5463	0.0295827	0.0951699	-4.63285
BNIP2	-0.492021	6.17346	-2.54594	0.0296009	0.0951699	-4.4482
TFAM	-0.47702	5.88158	-2.54522	0.0296367	0.0952549	-4.36881
BANP	-0.662009	4.69216	-2.54369	0.0297139	0.0954124	-4.2352
RANGRF	-0.558037	6.34536	-2.54048	0.0298765	0.0958439	-4.51106
GMPS	-0.486387	4.97416	-2.53574	0.0301174	0.0964943	-4.32397
TRIM11	-0.48747	7.65351	-2.53556	0.0301266	0.0964943	-4.6455
NDUFAF3	-0.455171	6.32469	-2.53518	0.0301461	0.0965262	-4.53976
RNF139	-0.495085	5.69031	-2.53342	0.0302366	0.0967857	-4.39879
RETREG2	-0.423669	5.78306	-2.52994	0.0304154	0.0972358	-4.49406
AGL	-0.522877	5.19062	-2.52733	0.0305507	0.0976069	-4.33895
MSMO1	-0.587112	5.31073	-2.52592	0.0306234	0.0977472	-4.34554
ERI2	-0.591517	4.27323	-2.52462	0.0306913	0.0978673	-4.13996
CDC23	-0.522249	5.09506	-2.52446	0.0306995	0.0978673	-4.30687
DGCR2	-0.500489	6.34688	-2.52265	0.0307939	0.0981374	-4.52559
TRMT44	-0.961578	2.53748	-2.52132	0.0308635	0.0983284	-3.85398
EXO1	-1.00962	3.67041	-2.52104	0.0308783	0.098345	-3.96438
QRICH1	-0.582829	5.03392	-2.51699	0.0310911	0.0989298	-4.33657
TOP3A	-0.979929	3.02106	-2.51627	0.0311292	0.0990199	-3.85788
UBLCP1	-0.690005	4.60847	-2.51472	0.0312112	0.0992497	-4.12044
PPAN	-1.54641	3.08428	-2.51439	0.0312287	0.0992524	-3.90158
SMC4	-0.397792	6.99443	-2.51427	0.0312347	0.0992524	-4.59499
RIDA	-0.577288	5.34072	-2.51415	0.0312412	0.0992524	-4.25305
ASF1A	-0.895997	3.47567	-2.51146	0.0313841	0.0995818	-3.87328
CETN2	-0.594318	4.78957	-2.51082	0.0314183	0.0996593	-4.22192
PRKAR2A	-0.489957	5.54166	-2.51011	0.0314559	0.0997476	-4.41519
MLX	-0.647344	4.08323	-2.50684	0.0316313	0.100179	-4.15725
SLC4A11	-0.576713	4.84115	-2.50494	0.031733	0.10047	-4.47063
FAIM	-1.06814	3.01739	-2.50448	0.0317577	0.100517	-3.87059
SSSCA1	-0.629658	3.80136	-2.50412	0.0317771	0.100547	-4.1918
SLC38A6	-1.05286	2.06671	-2.50356	0.0318074	0.10058	-3.70982
COX5B	-0.397306	8.20988	-2.50333	0.0318199	0.100588	-4.74456
SMPD2	-0.768028	2.24904	-2.50303	0.031836	0.100608	-3.96722
BRAT1	-0.534544	4.55591	-2.50235	0.031873	0.100665	-4.38673
BCR	-0.909014	2.91769	-2.50085	0.0319543	0.100857	-4.1084
UBE2G1	-0.586711	5.28106	-2.50053	0.0319714	0.100879	-4.41335
RPP25	-0.80167	3.23419	-2.49645	0.0321933	0.10136	-4.19392
LRRC61	-0.745817	3.24872	-2.49595	0.0322208	0.101383	-4.08854
DRG2	-0.970024	3.67998	-2.49502	0.0322718	0.101477	-4.06452
KIF1C	-0.395281	8.2351	-2.49473	0.0322875	0.101477	-4.77749
PYCR1	-0.433957	9.09784	-2.49415	0.032319	0.101536	-4.82612
DNPH1	-0.373531	7.41501	-2.49111	0.0324864	0.101906	-4.71817
MRPS33	-0.427751	6.98357	-2.4911	0.0324869	0.101906	-4.6179
MRPL47	-0.485672	5.65727	-2.49012	0.032541	0.102013	-4.46839
R3HCC1	-0.56426	3.93187	-2.48763	0.0326783	0.102411	-4.23897
APEX1	-0.512214	6.62512	-2.48718	0.0327036	0.102424	-4.51537
TMX2	-0.76263	4.19674	-2.48708	0.0327091	0.102424	-4.01632
CCNO	-0.703243	3.55822	-2.48617	0.0327598	0.10254	-4.11786
TXNDC9	-0.764149	3.78263	-2.48461	0.0328465	0.102749	-4.0706
RHOBTB3	-0.584762	6.45766	-2.48286	0.0329441	0.102991	-4.47215
CPNE8	-1.67889	1.5135	-2.48217	0.0329823	0.103079	-3.5478
SF3B3	-0.605805	6.43488	-2.48119	0.0330372	0.103187	-4.61506
UBA52	-0.390812	10.1549	-2.47993	0.0331081	0.103275	-4.91609
EXOSC1	-0.51934	5.05317	-2.4798	0.0331153	0.103275	-4.44159
TMEM121	-1.13395	4.00102	-2.47951	0.0331314	0.103275	-4.24634
USP39	-0.432275	6.01762	-2.47949	0.0331329	0.103275	-4.57289
ZYG11B	-0.7193	3.8324	-2.47797	0.0332183	0.103455	-4.08011
PCBD1	-0.540619	6.66163	-2.47769	0.0332339	0.103455	-4.65083
PRKACA	-0.387906	7.65816	-2.47601	0.033329	0.10367	-4.77007
FUCA2	-0.482845	5.70541	-2.47535	0.0333659	0.103736	-4.51189
CMC2	-0.522757	5.46966	-2.47491	0.0333907	0.103781	-4.48956
SLC7A6	-1.16822	2.35814	-2.47365	0.0334625	0.103973	-3.75147
AKIP1	-0.648065	5.12006	-2.4719	0.0335619	0.104186	-4.33831
SLC25A1	-0.721441	5.82756	-2.47086	0.0336212	0.104339	-4.54739
RCBTB1	-1.168	2.66705	-2.46901	0.0337266	0.104602	-3.73883
ADK	-0.536569	4.83245	-2.46778	0.0337968	0.10476	-4.37634
POLRMT	-0.504533	4.47624	-2.46398	0.0340151	0.105368	-4.38496
CTNNB1	-0.321962	8.49206	-2.46323	0.0340587	0.105471	-4.79845
ATPAF2	-0.651493	3.83513	-2.46284	0.0340812	0.105489	-4.22021
GOLM1	-0.42255	6.0349	-2.46247	0.0341023	0.10551	-4.57189
TIMM21	-0.711508	4.41369	-2.45954	0.0342722	0.105999	-4.30348
RABL6	-0.534763	5.62115	-2.45851	0.0343321	0.106124	-4.58656
NPRL2	-0.575296	5.14286	-2.45597	0.0344803	0.10655	-4.49128
ANKS6	-0.570103	4.81745	-2.45428	0.0345792	0.106755	-4.41023
SLC35A4	-0.660933	4.01188	-2.45394	0.0345993	0.106755	-4.38788
ALG8	-0.466488	5.2575	-2.45331	0.0346359	0.106836	-4.54357
ABCB8	-0.791434	3.10437	-2.45294	0.0346576	0.106838	-4.12845
SETD1A	-0.716	4.03672	-2.45294	0.0346576	0.106838	-4.372
SNORD104	-0.529636	4.66477	-2.45006	0.0348274	0.107264	-4.57953
TAZ	-0.633728	3.68062	-2.44861	0.0349129	0.107428	-4.26969
CDK5RAP2	-0.466438	5.36613	-2.44845	0.0349227	0.107428	-4.5692
MTFR2	-0.947417	3.10554	-2.44791	0.0349542	0.107455	-3.93756
MXD4	-0.692207	5.2402	-2.44701	0.0350079	0.107527	-4.50817
MRPL34	-0.52455	6.4915	-2.44559	0.0350917	0.107708	-4.70794
TMEM62	-0.764242	2.95516	-2.44482	0.0351377	0.107796	-4.14583
REEP6	-0.640524	4.85553	-2.44403	0.0351852	0.107909	-4.51133
OSR2	-0.566705	4.60937	-2.44348	0.0352177	0.107943	-4.35441
TSPO	-0.400979	7.40895	-2.44332	0.0352272	0.107943	-4.78401
CSTF3	-0.553218	5.80373	-2.44327	0.0352304	0.107943	-4.52151
MRI1	-1.09482	2.13477	-2.44313	0.0352387	0.107943	-3.89642
MPC2	-0.575992	5.3474	-2.44231	0.0352877	0.108056	-4.52371
CDK1	-0.383086	7.36567	-2.44216	0.0352968	0.108056	-4.69527
C11orf24	-0.406503	5.49245	-2.4414	0.035342	0.108123	-4.63035
PAK1IP1	-0.842886	3.93059	-2.44069	0.0353848	0.108123	-4.08643
DDX20	-0.873251	3.54964	-2.44063	0.0353881	0.108123	-4.11137
TRAPPC9	-0.535004	4.79369	-2.44026	0.0354105	0.108123	-4.5418
ZIC2	-0.52367	5.409	-2.44019	0.0354144	0.108123	-4.43509
ABCD3	-0.754527	4.60966	-2.43861	0.0355093	0.108381	-4.30186
UBAP1	-0.614741	4.07428	-2.43819	0.0355347	0.108426	-4.3696
DPM3	-0.367389	6.42738	-2.43759	0.0355707	0.108464	-4.72218
IFRD2	-0.560775	6.0988	-2.43745	0.0355793	0.108464	-4.67825
ILF3	-0.367269	7.79875	-2.43688	0.0356136	0.108527	-4.80132
RAD1	-0.55665	4.43817	-2.43612	0.0356596	0.108611	-4.39338
NOP9	-0.45176	5.5138	-2.43531	0.0357085	0.108728	-4.59736
VPS26A	-0.47678	5.23924	-2.43389	0.0357945	0.108892	-4.48462
GLOD4	-0.464292	5.5319	-2.43116	0.0359606	0.109201	-4.5333
PYGO2	-0.506121	5.70256	-2.42874	0.0361083	0.109519	-4.63304
ZNF398	-0.879734	2.87422	-2.42762	0.0361766	0.109692	-4.14081
CLTB	-0.921973	5.03928	-2.42745	0.036187	0.109692	-4.54733
USP1	-0.462764	5.75552	-2.42635	0.0362543	0.109864	-4.59645
SENP3	-0.830177	3.01252	-2.42547	0.0363083	0.109929	-4.07246
KLHL25	-0.880825	2.55909	-2.42454	0.0363661	0.110071	-4.05058
AP1M1	-0.853377	5.3213	-2.42436	0.0363769	0.110072	-4.60785
VPS45	-0.711537	3.36413	-2.42323	0.0364467	0.110225	-4.1619
PANK1	-0.809585	3.45072	-2.42301	0.0364601	0.110225	-4.19853
VRK3	-0.594464	5.04785	-2.42116	0.0365745	0.110472	-4.55259
CHTF8	-0.488585	7.8191	-2.42062	0.0366079	0.110523	-4.83754
SHISA5	-0.320601	7.4989	-2.42054	0.0366131	0.110523	-4.87831
SPC24	-0.451108	4.78626	-2.41989	0.0366535	0.11058	-4.5546
MCUR1	-0.621918	4.67808	-2.4186	0.0367332	0.110754	-4.36593
LINC00346	-0.692133	3.28576	-2.41745	0.0368047	0.110904	-4.2522
EFCAB11	-0.704757	3.73067	-2.41602	0.0368941	0.111108	-4.25205
DPH5	-0.465803	5.85178	-2.41458	0.0369844	0.111314	-4.6744
CC2D2A	-0.719761	3.17349	-2.41312	0.0370755	0.111489	-4.27411
EMILIN2	-0.527643	3.79158	-2.41231	0.0371266	0.11161	-4.46732
SUGT1	-0.374855	7.39415	-2.40868	0.0373552	0.112102	-4.8072
FAM173A	-0.79711	4.57251	-2.40865	0.0373575	0.112102	-4.47342
ESCO2	-1.15103	2.76781	-2.40658	0.0374886	0.1124	-3.89983
STAG1	-0.526068	4.60865	-2.40608	0.0375204	0.112462	-4.42983
ZNHIT1	-0.450067	5.10549	-2.40476	0.037604	0.112646	-4.61068
RAD21	-0.363166	7.86936	-2.40344	0.0376881	0.112865	-4.78247
DTX4	-0.536288	4.5023	-2.40308	0.0377114	0.112901	-4.52458
NOL6	-1.15556	3.21511	-2.40288	0.037724	0.112906	-4.13377
MTG2	-0.730813	3.76828	-2.39968	0.0379288	0.113404	-4.35283
ZDHHC6	-0.460132	5.76935	-2.39768	0.0380572	0.113644	-4.65268
DDX21	-0.345109	8.33174	-2.39753	0.0380671	0.113644	-4.8927
MLF2	-0.399525	7.66328	-2.39747	0.0380712	0.113644	-4.88914
ANGEL2	-0.866208	4.02603	-2.39673	0.0381186	0.113719	-4.18743
SRP72	-0.386377	6.97179	-2.39473	0.0382476	0.11397	-4.76133
RTF2	-0.362273	6.65231	-2.39273	0.0383777	0.114324	-4.76365
PRDX6	-0.336833	7.81651	-2.39023	0.0385404	0.114708	-4.87942
DNAAF2	-0.755275	3.92927	-2.39005	0.0385518	0.114709	-4.12214
ADGRG1	-0.495468	5.12352	-2.38985	0.0385646	0.114713	-4.64691
METTL6	-0.711414	2.93489	-2.38793	0.0386903	0.11502	-4.1537
PSMD4	-0.343556	7.92555	-2.38759	0.0387128	0.11502	-4.87466
GUCD1	-0.458919	6.01133	-2.387	0.0387516	0.115101	-4.70654
RETSAT	-0.395099	6.76922	-2.38605	0.0388135	0.115184	-4.8177
AK1	-0.970552	3.35544	-2.38292	0.0390198	0.115628	-4.14924
TMEM33	-0.400759	6.39791	-2.38185	0.0390905	0.115804	-4.731
ADAR	-0.391175	7.16692	-2.37871	0.0392988	0.116218	-4.81217
DDX17	-0.304136	8.54259	-2.37838	0.0393202	0.116233	-4.95798
USE1	-0.578568	3.82673	-2.37828	0.0393268	0.116233	-4.41824
MMS22L	-0.818573	3.21377	-2.37765	0.0393692	0.116325	-4.14118
DBNL	-0.658758	5.43606	-2.37626	0.0394616	0.116496	-4.71331
B4GALT2	-0.38395	7.8696	-2.37437	0.0395877	0.11672	-4.95676
FBXL15	-0.602373	4.67797	-2.37399	0.0396134	0.116741	-4.58167
WDHD1	-0.630516	4.40549	-2.37323	0.0396641	0.116857	-4.43229
WASHC5	-0.719071	4.04311	-2.37196	0.0397495	0.116981	-4.29381
COIL	-0.602414	5.87627	-2.37181	0.0397595	0.116981	-4.7059
SAP30BP	-0.46011	6.1505	-2.37175	0.0397638	0.116981	-4.80919
SYNGR2	-0.326596	8.32913	-2.36986	0.0398912	0.117288	-4.98928
GTF3C1	-0.486016	5.6873	-2.36863	0.0399741	0.117459	-4.65186
NUDCD3	-0.583606	5.89303	-2.36845	0.0399861	0.117459	-4.7532
TMEM64	-0.451332	5.5526	-2.36831	0.0399953	0.117459	-4.59925
PHETA1	-0.577264	4.37932	-2.36766	0.0400395	0.117555	-4.6213
NPAT	-0.551117	4.2365	-2.36715	0.0400743	0.117605	-4.43059
RPS26	-0.730743	5.71706	-2.36661	0.0401108	0.117605	-4.21417
WDR73	-0.821859	3.7872	-2.36643	0.0401228	0.117605	-4.37979
ACOX2	-1.06889	2.44298	-2.36638	0.040126	0.117605	-4.08717
GFER	-0.660377	4.63952	-2.36392	0.0402938	0.118063	-4.56303
CCNE2	-0.959315	2.90431	-2.36226	0.0404066	0.118261	-4.0409
TRMT5	-0.619718	4.28288	-2.36224	0.0404078	0.118261	-4.48408
KPNA6	-0.524583	4.38823	-2.36161	0.0404512	0.118354	-4.52683
TMEM98	-0.402047	6.61925	-2.36143	0.0404634	0.118355	-4.82973
RDH14	-0.452709	5.21629	-2.36018	0.0405489	0.118571	-4.63327
POLDIP3	-0.449547	6.70923	-2.35903	0.0406277	0.118768	-4.93067
MYLIP	-0.876995	3.03473	-2.3583	0.0406777	0.118825	-4.1077
PRMT6	-1.20302	2.51365	-2.35825	0.0406814	0.118825	-3.9227
SLC16A9	-0.922934	3.62382	-2.3582	0.0406848	0.118825	-4.2156
CENPS	-0.803396	4.40469	-2.35789	0.040706	0.118825	-4.51316
YTHDF1	-0.381988	6.25255	-2.35777	0.0407147	0.118825	-4.81864
CENPW	-0.52792	5.68228	-2.35773	0.0407173	0.118825	-4.72836
TANGO2	-0.743012	2.69136	-2.35742	0.0407388	0.118854	-4.22683
EREG	-0.360867	7.48393	-2.35675	0.040785	0.118954	-4.88011
CHCHD6	-0.554689	4.08148	-2.35592	0.0408418	0.119086	-4.48851
CEP78	-0.553578	4.28664	-2.35409	0.0409685	0.119284	-4.4285
G6PD	-0.416513	5.50192	-2.35387	0.0409834	0.119294	-4.71781
AKAP8	-0.474427	4.78846	-2.35348	0.0410109	0.11934	-4.61226
DNAJC7	-0.422447	6.61179	-2.35272	0.0410635	0.119458	-4.78185
LZTS1	-0.737659	3.94054	-2.35118	0.0411708	0.119713	-4.35926
MORN2	-0.752421	3.55369	-2.35101	0.041182	0.119713	-4.34147
SDAD1	-0.424778	5.57338	-2.34927	0.0413038	0.119952	-4.72503
TRPC4AP	-0.430305	5.35585	-2.3467	0.0414835	0.120377	-4.69137
SLC25A12	-0.790377	3.24505	-2.34667	0.0414856	0.120377	-4.12057
ELP1	-0.649662	4.3826	-2.34379	0.0416875	0.120859	-4.49706
TP53I13	-0.517536	4.74713	-2.34349	0.0417088	0.120887	-4.51706
ATP6V1C1	-0.467024	5.30862	-2.34313	0.0417338	0.120925	-4.651
ACSF3	-0.733732	3.28552	-2.34187	0.0418232	0.121115	-4.3486
PARP1	-0.404932	6.87868	-2.34099	0.0418855	0.121242	-4.87787
MRPL2	-0.441592	4.93502	-2.34091	0.041891	0.121242	-4.73268
LANCL2	-0.707759	3.18096	-2.34053	0.0419181	0.121286	-4.24027
FIS1	-0.39151	5.89119	-2.3401	0.0419486	0.12134	-4.82123
MED27	-0.435464	6.01412	-2.33941	0.0419973	0.121435	-4.73803
IBA57	-0.615394	3.39402	-2.33929	0.0420053	0.121435	-4.40811
UBE2I	-0.41309	7.90802	-2.33849	0.0420628	0.121473	-4.953
TPD52L1	-0.422514	5.70911	-2.33795	0.0421007	0.121473	-4.76767
SHLD2	-0.526247	5.03252	-2.33785	0.0421077	0.121473	-4.65587
ACYP1	-0.617714	4.98789	-2.33764	0.0421228	0.121473	-4.6115
FANCD2	-0.561055	4.63354	-2.3376	0.0421258	0.121473	-4.4591
ICAM3	-0.797696	2.66363	-2.33661	0.0421964	0.121607	-4.23592
PPP1R14B	-0.384898	7.28777	-2.33619	0.0422258	0.121658	-4.77379
RWDD2B	-0.459616	4.81299	-2.33426	0.0423643	0.121988	-4.6469
FBXW5	-0.734588	5.78569	-2.33325	0.0424364	0.122161	-4.79076
SRR	-0.893963	2.4026	-2.33256	0.0424857	0.122268	-4.08952
PES1	-0.431012	5.93957	-2.3306	0.0426265	0.122639	-4.841
BEX3	-0.336499	8.42173	-2.33019	0.0426559	0.122679	-4.99803
IFT52	-0.500363	4.36151	-2.33007	0.0426647	0.122679	-4.61904
GTF2F2	-0.478839	6.2099	-2.32929	0.0427208	0.122771	-4.8019
CDK2	-0.381428	7.4419	-2.32874	0.0427605	0.12285	-4.9529
C8orf82	-0.350168	5.60508	-2.32831	0.0427915	0.122905	-4.89556
WDR83OS	-0.50061	7.08555	-2.32741	0.042857	0.123024	-4.89729
MRPS35	-0.453395	5.79387	-2.32073	0.0433428	0.124278	-4.79062
ELOVL6	-0.548458	5.30585	-2.31972	0.0434167	0.12442	-4.57557
ANAPC4	-0.493832	4.69323	-2.31926	0.04345	0.12448	-4.63692
ORC6	-0.529967	5.02489	-2.31785	0.0435538	0.124707	-4.5992
FXN	-0.629403	4.54583	-2.31664	0.0436431	0.124893	-4.53929
PTPN1	-0.400527	7.74618	-2.31646	0.0436564	0.124896	-4.9937
KIF9	-0.443219	5.75134	-2.31463	0.043791	0.12514	-4.83044
FRG1BP	-0.628227	2.55573	-2.31402	0.0438361	0.125209	-4.43026
CTR9	-0.35382	6.70054	-2.31204	0.0439833	0.125443	-4.8818
C20orf27	-0.624111	5.52883	-2.31097	0.0440624	0.12558	-4.67776
LAMTOR4	-0.321693	7.00012	-2.31091	0.0440667	0.12558	-4.97627
FAM129A	-0.779726	2.64333	-2.31089	0.0440685	0.12558	-4.23518
XRCC3	-0.995173	2.1562	-2.31026	0.0441149	0.125678	-4.16498
[truncated: 3,559 more rows]

## Sheet: KO_lo_vs_WT_q05genes
HSPE1
H2AFX
KPNA2
SRSF3														Genes with significant change
ATP5MC1
NDUFAF8
ACP2
KLK6
PCNA
HOXA7
UQCRQ
MCM5
PHB
ATP5MC3
GINS2
DCTPP1
GPATCH4
PCLAF
GRWD1
NUDC
EIF4G1
COPS9
POLR2L
NME1
MCM2
PGP
PSMB6
NDUFB10
SAC3D1
TRAPPC2L
SRM
CENPM
STARD7
PPIF
MT-ND3
PSMC3
NUBP2
H2AFZ
EIF4G2
AMDHD2
HMGB1
MRPS34
LRR1
PSMA4
CCT2
MRPL20
PSME3
MRPL11
GEMIN4
MRPL41
MRPL52
MRPL27
MRPS12
SNHG9
COMMD5
RPA2
NOP56
NDUFB9
LINC01963
NHP2
CLUH
POLR3H
TFRC
VDAC3
NUP62
XRCC6
ALG1
ZWINT
QDPR
LAMTOR1
PPIH
MED31
MRFAP1
DDX23
IMP3
TFDP1
JMJD8
PRELID1
ATP5MF
GMNN
TIMM17A
FOXRED2
PINX1
SRRM1
MCM4
PPIA
POLE3
GAL
CENPX
ILKAP
BIRC5
IMP4
DNAJA1
AURKA
LETM1
DEF8
RFC5
PRPS1
SRSF2
MCM7
CYB561A3
ZMPSTE24
RPUSD1
DBI
HOXA9
SIVA1
TST
SAE1
DDX56
KLK5
RAN
LSM4
TACC3
HDGF
FDFT1
TUFM
G3BP1
DHX37
TMEM199
EMC8
STMN1
TPRG1L
SLC46A1
CAD
ATP6V0D1
MVK
CFL1
CCNB1
RUVBL1
DDX28
GTF3A
COMMD4
TSN
MRPL49
DPH2
HSD17B10
PSMA7
FPGS
CNOT9
TACO1
PA2G4
PPM1G
LSG1
HSPD1
TMEM250
AURKAIP1
PCYT2
FAM111A
TALDO1
HNRNPAB
SLC9A3R1
SNRNP25
DLD
RRS1
TELO2
FOXRED1
ZNF544
CNDP2
MTHFD1
CLU
CNP
MRPL46
HNRNPM
PSMD1
MINOS1
POP4
ASF1B
LDHB
TAF9B
FLAD1
CTNS
MRPL4
SFXN2
ASNA1
DTYMK
SNU13
TLCD1
LMNB2
WDR5
TCP1
HSPA8
KBTBD6
FKBP4
ARMC6
CYC1
MRPL40
SCO2
FUS
ATP5F1E
MRPL3
VWA1
TMEM218
CCT5
CDK4
ITPA
SRSF6
EEF1AKNMT
FGFBP1
PSMB4
PSMB5
CBX2
CIAO2A
RBM14
RPS6KA4
UNG
EMG1
SNRPD2
POMP
CCT7
GOT2
RPUSD2
SLC25A19
COA7
KARS
ZBTB45
WWP2
CD3EAP
AHSA1
LYRM7
LAMP1
RNASEH2A
MKI67
ELAC2
WDR4
DOHH
NAA50
POP5
SLC2A4RG
EPN3
GMPPB
TIMM10
TRIAP1
COX7B
UBB
TMEM147
UBE2N
RRM2
GNA12
TIMM23
NAXE
GLMP
PRDX1
GFM1
IPO4
CASP2
EIF3B
NFS1
RAB5IF
MRPS7
NOP58
FAM98A
TFIP11
COX6B1
THAP7
CSTA
PSMD2
CCNE1
NUDT5
MTMR2
SDSL
DAG1
GINS1
PYM1
MRPL57
FAM111B
PFN1
TMEM109
EXOSC4
SYPL1
LINC00839
EIF2B2
SPR
FAH
MYBL2
TUBB4B
PSMD13
DHCR24
FAM155B
TUSC2
URM1
RUSC1
STOML2
SRSF7
PRPF4
KIF22
SIGMAR1
RPA1
SLC25A10
ICMT
BYSL
ILF2
SLC5A6
ZNF668
COMMD9
HSPBP1
RRP1B
METTL1
MRPL18
UROD
MT-ND2
AP2S1
PSMF1
TMEM208
APEX2
POLR2G
TMEM126B
ACTR1A
NUDT1
NOC2L
AURKB
CCDC167
NOL9
GPATCH3
MT-CO3
EIF1AX
SF1
MRPL12
ELP5
COX8A
SSBP1
PPP2CA
CISD1
MCM6
RCC1L
MRPL24
MCM10
PARK7
RFC3
UQCC1
CDC20
TEDC1
CDC25A
CTU2
PUSL1
C1orf122
CIAPIN1
SUMO3
ADORA1
VPS33A
POLR2E
MANEAL
ATP5PB
MIR200CHG
GNPDA1
CPSF6
EEF2KMT
UMPS
SNRPB
TXNL4A
POLDIP2
PUS1
SRSF8
CENPB
PARPBP
UTP15
MRPL37
RUVBL2
NAA38
LSM3
TIPIN
GINS3
NCLN
NOL11
FAAP100
SPHK2
SLC27A5
DHX30
YWHAB
PSMD14
TSR3
DNAJC9
MRPS18C
EDF1
POLR1A
CBX3
PNO1
CTPS1
PSMA2
UTP11
SFPQ
ANAPC7
MRPL15
ASRGL1
TOMM40
MRPS23
MAX
VMA21
ANAPC13
C17orf97
ABCC2
TRA2A
NCL
DNAJB6
SNRPE
TRAPPC3
MOK
CYSRT1
HNRNPH2
ALDH9A1
HEYL
ALG5
RNF26
TIMM8B
UQCC3
CCDC51
OAS3
NDUFAB1
GPS1
POC1A
SAPCD2
ATOX1
CCDC57
TTF2
LAD1
TIMM13
MRTO4
RBM38
NTHL1
RRP36
CASTOR3
SKP2
YDJC
DHCR7
HIF1A
DCXR
GEMIN6
STK11
CDCA5
ORC5
FIZ1
TXN2
PSKH1
NLRC5
NSMCE2
CLSPN
COX4I1
PRMT5
CARS2
ORMDL2
NDUFA2
GLA
ERVK3-1
SLC19A1
TTK
EIF4E2
TRUB2
TCTN3
DYNLL2
BRMS1
MRPL14
CYB5R2
RPS19BP1
NDUFB8
GAMT
SSTR5-AS1
PRR34-AS1
CYCS
LAS1L
BCS1L
VPS29
KLK10
ERCC2
ATAD3A
EIF3K
COPS6
NDC1
MCRIP2
AIFM1
DEGS1
HSPH1
TPCN2
EIF6
ATAD3B
HPS6
NDUFA9
KLK7
PGAM5
ERCC6L
EIF5A
NSDHL
TK1
DHRS1
UPF1
TATDN2
CCT3
SDF2L1
PNP
DANCR
TRMT61A
GLRX5
SRA1
SRP14
IPO9
FDXR
CALM1
FH
HUS1
SLC25A3
UQCRFS1
C19orf47
NDUFS1
ZNF587B
HSPA4
BUB3
FARSA
TRIM14
EIF3G
TPX2
PEX26
HSP90AB1
MCAT
FUBP1
PSMA5
ANP32B
SEC61A1
DNAAF3
PSMG3
ACOT7
C19orf70
ABCF2
MCM3
HMBS
WDR77
TRAP1
TRPM2
RANBP1
ARFGAP2
SUPT4H1
CHKB-DT
KLHDC4
ITGAE
GPAM
CHMP1A
FDXACB1
PTCD1
KAT14
UPF3B
RBM8A
C8orf33
RNF34
NDUFC2
ELFN1-AS1
TSR2
MRPL55
HINT2
HSP90AA1
BAG1
TMEM97
LRRC59
ECHS1
UBAP2L
MAEA
WDR34
C12orf43
ISG15
ATP5MG
DDX54
SNAPC5
NIPA2
RPS6KA1
PSMB1
NAA10
MBD3
SNF8
PTDSS1
LSM7
ZNF593
CREB3
HELLS
MRPS26
FAM136A
RRM1
PGD
UBL4A
MFSD13A
CCDC137
MRPL35
MRPL28
TMPO
OGFOD1
WRAP53
UFD1
BZW2
GINS4
NDUFS7
FAM83D
AMD1
OAZ1
SSNA1
PHB2
MIEF1
NRIP1
FUBP3
ANAPC11
HYLS1
DDIAS
EIF5B
GTF3C4
TRAPPC4
NDUFS6
SNRPC
NFKBIB
HDDC3
SNHG16
NUP93
ATP5PF
RNF185
KEAP1
RIOX1
COA3
MON1A
PSMG1
DHX8
TARBP2
FEN1
UNC93B1
LFNG
TRMT112
FARSB
WDCP
HMGB3
JPT1
BCAP31
U2AF2
DCAF13
B4GALT7
C7orf50
TMEM104
SHMT2
PUDP
ETF1
MFSD5
TMEM70
RBM3
DRG1
IKBKE
NDUFA10
POLD2
IDH3A
FBXW9
DYNLL1
MSANTD4
IVD
TMEM141
UROS
SEPHS1
NME3
RAMP1
RCCD1
HGH1
ANXA1
NEDD8
YME1L1
BLM
RANGAP1
MRPL43
C5orf22
SRRT
CENPV
NOP2
BCLAF1
PLK1
CCDC86
MRFAP1L1
EIF2S1
NOP16
ARF3
SMARCA2
LCLAT1
MUL1
COMTD1
FANCG
CCNQ
COPS3
OR7E38P
CRELD2
ZNF326
HNRNPDL
TSR1
CTNNBL1
AP2M1
HMGN3
ANKEF1
NDUFS3
TOE1
ERH
PEF1
UBE2L3
NDUFA8
WDR18
MRM3
C9orf116
PHF5A
MIS12
TSSC4
ARHGDIA
SF3B4
STEAP1
ROMO1
TEDC2
MFN2
AAGAB
EIF2B4
GEMIN5
PDCD6
VTI1A
YWHAH
G6PC3
TRMU
MPC1
HCFC1
ADCK1
ATMIN
TPRN
STIP1
AMMECR1
MRPL22
ZDHHC12
THEM6
MEPCE
MAGEB2
PSMD12
UTP14A
C1orf131
MRPS21
ZNHIT2
BABAM1
ADRM1
LGALS3BP
VPS9D1-AS1
CYB561
HNRNPR
NELFB
NOLC1
LSM1
SOD2
MITF
PTPMT1
NOP14
RABEPK
TAOK2
ATPAF1
CFL2
TRMT10C
LAMTOR2
SNX17
TBC1D7
EI24
LAP3
SETD1B
PRCC
POP7
TGFBRAP1
AGPS
POLR3K
RBM12
CHD4
NPM3
DDX49
BAP1
RBM19
CCNA2
NDUFA11
SLC25A28
LRRC20
CHAF1A
ZC3HAV1
SURF1
LMNB1
MRPL20-AS1
NUDT16L1
MRPS18A
MRPL21
DDX39A
GSTK1
THRAP3
APRT
CDC25C
CRY1
GTF3C6
PSMB2
WDR3
ASH2L
SPCS1
CLN3
PAFAH1B3
DSTN
RNASEH2B
MRPL44
PRPF19
STRAP
TMEM177
FIBP
EBP
DLAT
VPS25
PAK2
ZNF101
GHITM
GNA11
LRRC14
PTRH1
THOP1
USB1
RBM12B
TAF11
FLII
ANAPC15
PPT1
MRM2
TTC26
DHX15
ZW10
HOXA10
C19orf48
CDK5RAP1
BAD
HYOU1
SNX12
SPATA33
EVA1C
MPHOSPH6
RRP9
AP1B1
VCP
CENPO
ZNF576
MSRB1
PSMD3
RBP7
NCOA4
PIN1
SOD1
RTCB
EIF2B3
NIP7
AIMP2
RER1
ELOF1
MCRS1
NCDN
HNRNPF
CLN6
MAPRE2
CHAF1B
NPM1
SNRPD1
NUP210
TAB1
RNF40
UQCR11
CYB5B
CDK2AP2
NPLOC4
PSMD7
CD320
DCAF7
MRPS2
DNAJB1
PTTG1
GSTP1
BANF1
SHMT1
ANKRD39
AVEN
POLR3B
LINC01234
MRTFB
PCCB
FANCA
SDR42E1
EMC10
POLA2
ATRAID
AP1AR
C19orf24
DMKN
HAUS2
GATC
PTER
DPM2
KIF23
PSPC1
AP5S1
SNAPC2
DNM1L
EXOSC3
MLYCD
ZC3HC1
PSMD8
SERBP1
RNF187
PPIE
CDCA4
PSMC4
SCO1
TNRC6A
SCLY
PDSS1
ECI2
C15orf39
UHRF1
MANBAL
DUT
COX5A
BCL2L12
ABCE1
E2F1
ENHO
RNASEH1
NDUFAF1
USP31
RPA3
POGK
PARL
NDUFA4
CD83
DDX19A
COQ4
COG8
RAB26
COASY
PADI3
MTDH
HACD3
GRK6
APEH
PARP12
SECTM1
KHDRBS1
PPIL1
MDH2
CDK5
ARMC1
MSH2
STMP1
TOMM7
ANXA9
DHX29
SSRP1
CCNF
SH3RF2
SDR39U1
PEX10
ATP5F1B
ZNF346
CALB2
PRIM1
POLR3G
URB2
CACYBP
THAP7-AS1
MYL6
COMMD8
PUM3
C12orf10
UCK1
POP1
RUFY1
POLQ
GAK
SLC25A46
CHCHD2
HAUS1
PRDX4
ADSL
MRPS11
CCDC34
FDPS
SRSF10
TOMM70
MTA2
HIBCH
RTRAF
CALR
DGKQ
CSE1L
CDC37
EIF4EBP2
NASP
C4orf48
TPRA1
RRP7A
SRPRB
MRPS10
EXOSC6
RAE1
CHERP
ZDHHC14
NSL1
PDE12
MRPL30
EXOSC5
LARS2
CCND3
NINJ1
TPGS2
RAB5C
DLEU2
COMMD7
NUP214
PMPCA
SUCLG1
FES
SUPT16H
BOP1
SNRNP200
API5
AKT1S1
SAP18
ATP5F1EP2
SF3B5
CCDC127
IRF1
SCARA3
EEF1AKMT1
ZNF142
REX1BD
PPAT
HNRNPC
DCTN1
GMFB
CPSF2
GPN1
NOC4L
OTUB1
EBNA1BP2
SAMM50
SMUG1
GPX1
PPP1CA
IDE
SLC16A14
DNTTIP2
RCN2
PRKAB1
KIF4A
ORC3
EME1
NR6A1
C19orf53
ADAM15
CTDNEP1
UBE2F
RHBDD3
MAPKAP1
UQCR10
POLE4
SARS2
RBM47
THAP11
NDUFV1
PSMD5
ISY1
TRIM41
MRS2
HSDL2
NFKB1
XPO1
PDCD2
TMEM201
CSRP1
SET
HSPA4L
ATP6V0E2
NUP98
SKP1
CEP55
MRPS16
NDUFB7
ANKRD52
NAGLU
PIP4K2C
NSFL1C
SNX5
ATIC
TTLL5
MFSD3
MGAT4B
CKS2
ISCU
ABCC5
DDX6
NSMCE4A
HNRNPU
ATP5MPL
GPAA1
RANBP3
ATP6V1D
NCOA5
GTF3C5
GGCT
EXOSC2
IDH3B
MPP2
PPCDC
SLC9A6
EMP2
VAMP3
TCERG1
LIN7C
HNRNPA0
PSMC5
PRDX3
OPA3
TMEM138
ARPC4
AGTRAP
ATAD2
FAF2
ELP6
CDCA8
SNRNP40
COMMD1
DGCR6L
TMEM63A
HDGFL2
THYN1
OIP5
ORC1
MAIP1
UBE2D4
E2F2
SQLE
ZFP41
COX6A1
NSUN5
CNPY2
KHSRP
SUB1
RPS3P6
RNF141
TRMT2A
NDC80
NDUFS5
MARCKS
INCENP
UBTF
RAB7A
NSMCE1
HNF4A
TRIM28
ERVMER34-1
CTDSPL
EPPK1
COPZ1
RNASEH2C
NT5C
RFK
CINP
CYB5A
WDR6
PPP1R7
ARMC7
ESS2
TPRKB
BLOC1S1
CCT8
SH2B2
VPS35
HEATR3
RARS
POLR1B
DLGAP5
ISOC2
TRIM68
LMNA
HCCS
TARDBP
TGS1
EEF1E1
PMVK
PKMYT1
TCHP
KIF20B
RMND5B
ARHGEF39
RPS6KB2
SAP130
METTL7A
HMGN2
ZNF771
EMC3
PRPF38A
HNRNPH1
MFSD12
VAMP8
ATP2A1-AS1
MYCBP
BRCA1
KIF14
ZFP36L2
NDUFB2
YKT6
TIGAR
ADIPOR2
PRPF3
USP14
ADCK2
NUDT16
CIAO1
C19orf25
NCAPH2
LRRC45
KLHL21
EIF4E
PRPF40A
FAM173B
CCDC124
C2CD2L
MAF1
CTCF
CHPF
RSU1
C1orf109
SPRYD4
IFT46
EHMT1
FTSJ3
MMACHC
SFT2D2
PSRC1
POLR2J
EID2
CLPTM1
TIMM8A
SDHA
TNFAIP8L1
EMC6
RTN3
ALG3
POLE2
E4F1
NUP85
TMEM203
SNRPA
LAGE3
EIF2B1
ITPRIPL1
BORCS6
SSB
ATP5F1D
BAG2
HNRNPL
MOSPD3
ZNF488
TNPO2
TBC1D10B

## Sheet: GSEA_positive
NAME	GS<br> follow link to MSigDB	GS DETAILS	SIZE	ES	NES	NOM p-val	FDR q-val	FWER p-val	RANK AT MAX	LEADING EDGE
HALLMARK_HYPOXIA	HALLMARK_HYPOXIA	Details ...	140	0.819319	3.45032	0	0	0	778	tags=57%, list=8%, signal=61%
HALLMARK_TNFA_SIGNALING_VIA_NFKB	HALLMARK_TNFA_SIGNALING_VIA_NFKB	Details ...	137	0.771531	3.20878	0	0	0	1418	tags=63%, list=14%, signal=72%
HALLMARK_EPITHELIAL_MESENCHYMAL_TRANSITION	HALLMARK_EPITHELIAL_MESENCHYMAL_TRANSITION	Details ...	94	0.728132	2.90652	0	0	0	1418	tags=55%, list=14%, signal=64%
HALLMARK_KRAS_SIGNALING_UP	HALLMARK_KRAS_SIGNALING_UP	Details ...	89	0.654625	2.60085	0	0	0	1679	tags=42%, list=16%, signal=49%
HALLMARK_UV_RESPONSE_DN	HALLMARK_UV_RESPONSE_DN	Details ...	101	0.613356	2.45188	0	0	0	2010	tags=50%, list=20%, signal=61%
HALLMARK_P53_PATHWAY	HALLMARK_P53_PATHWAY	Details ...	163	0.544144	2.32729	0	0	0	708	tags=22%, list=7%, signal=23%
HALLMARK_TGF_BETA_SIGNALING	HALLMARK_TGF_BETA_SIGNALING	Details ...	44	0.668681	2.31228	0	0	0	706	tags=36%, list=7%, signal=39%
HALLMARK_IL2_STAT5_SIGNALING	HALLMARK_IL2_STAT5_SIGNALING	Details ...	122	0.555243	2.26256	0	0	0	853	tags=25%, list=8%, signal=27%
HALLMARK_GLYCOLYSIS	HALLMARK_GLYCOLYSIS	Details ...	161	0.524283	2.2276	0	0	0	618	tags=22%, list=6%, signal=23%
HALLMARK_IL6_JAK_STAT3_SIGNALING	HALLMARK_IL6_JAK_STAT3_SIGNALING	Details ...	42	0.630806	2.16585	0	0	0	1980	tags=45%, list=19%, signal=56%
HALLMARK_MYOGENESIS	HALLMARK_MYOGENESIS	Details ...	95	0.547784	2.16475	0	0	0	1695	tags=40%, list=17%, signal=48%
HALLMARK_ESTROGEN_RESPONSE_EARLY	HALLMARK_ESTROGEN_RESPONSE_EARLY	Details ...	153	0.492916	2.1026	0	0	0	1026	tags=30%, list=10%, signal=33%
HALLMARK_ANGIOGENESIS	HALLMARK_ANGIOGENESIS	Details ...	17	0.74294	2.04561	0	9.89011e-05	0.001	2085	tags=76%, list=20%, signal=96%
HALLMARK_INFLAMMATORY_RESPONSE	HALLMARK_INFLAMMATORY_RESPONSE	Details ...	79	0.515965	1.98955	0	0.000393673	0.004	1724	tags=34%, list=17%, signal=41%
HALLMARK_HEDGEHOG_SIGNALING	HALLMARK_HEDGEHOG_SIGNALING	Details ...	17	0.698718	1.93343	0	0.000731954	0.008	2466	tags=71%, list=24%, signal=93%
HALLMARK_APOPTOSIS	HALLMARK_APOPTOSIS	Details ...	117	0.47161	1.9323	0	0.000686207	0.008	541	tags=21%, list=5%, signal=21%
HALLMARK_ANDROGEN_RESPONSE	HALLMARK_ANDROGEN_RESPONSE	Details ...	80	0.491991	1.90381	0	0.000835729	0.01	1619	tags=33%, list=16%, signal=38%
HALLMARK_COMPLEMENT	HALLMARK_COMPLEMENT	Details ...	107	0.433451	1.7528	0	0.00350286	0.044	863	tags=21%, list=8%, signal=22%
HALLMARK_COAGULATION	HALLMARK_COAGULATION	Details ...	57	0.477777	1.70153	0.0036036	0.00507155	0.064	1315	tags=39%, list=13%, signal=44%
HALLMARK_CHOLESTEROL_HOMEOSTASIS	HALLMARK_CHOLESTEROL_HOMEOSTASIS	Details ...	60	0.446096	1.63601	0.00187266	0.00922861	0.125	436	tags=18%, list=4%, signal=19%
HALLMARK_MTORC1_SIGNALING	HALLMARK_MTORC1_SIGNALING		180	0.352592	1.53253	0.00182815	0.0232957	0.296	665	tags=17%, list=7%, signal=18%
HALLMARK_ESTROGEN_RESPONSE_LATE	HALLMARK_ESTROGEN_RESPONSE_LATE		149	0.352838	1.52513	0.00177305	0.0235549	0.311	1093	tags=24%, list=11%, signal=27%
HALLMARK_HEME_METABOLISM	HALLMARK_HEME_METABOLISM		140	0.348684	1.47483	0.00554529	0.0346528	0.439	1075	tags=19%, list=11%, signal=20%
HALLMARK_APICAL_JUNCTION	HALLMARK_APICAL_JUNCTION		117	0.362759	1.47425	0.0125673	0.0333827	0.442	1964	tags=35%, list=19%, signal=43%
HALLMARK_APICAL_SURFACE	HALLMARK_APICAL_SURFACE		21	0.463706	1.35123	0.1	0.0822983	0.785	2320	tags=43%, list=23%, signal=55%
HALLMARK_KRAS_SIGNALING_DN	HALLMARK_KRAS_SIGNALING_DN		42	0.388819	1.31629	0.115385	0.102947	0.867	890	tags=21%, list=9%, signal=23%
HALLMARK_PI3K_AKT_MTOR_SIGNALING	HALLMARK_PI3K_AKT_MTOR_SIGNALING		82	0.327797	1.25862	0.110476	0.145959	0.935	423	tags=11%, list=4%, signal=11%
HALLMARK_UNFOLDED_PROTEIN_RESPONSE	HALLMARK_UNFOLDED_PROTEIN_RESPONSE		103	0.305501	1.22437	0.12724	0.174759	0.971	809	tags=15%, list=8%, signal=16%
HALLMARK_WNT_BETA_CATENIN_SIGNALING	HALLMARK_WNT_BETA_CATENIN_SIGNALING		31	0.381991	1.21211	0.236686	0.183809	0.98	548	tags=16%, list=5%, signal=17%
HALLMARK_UV_RESPONSE_UP	HALLMARK_UV_RESPONSE_UP		120	0.291601	1.19855	0.159696	0.193228	0.987	679	tags=13%, list=7%, signal=14%
HALLMARK_PROTEIN_SECRETION	HALLMARK_PROTEIN_SECRETION		86	0.286508	1.10981	0.26465	0.308538	0.999	2660	tags=37%, list=26%, signal=50%
HALLMARK_REACTIVE_OXIGEN_SPECIES_PATHWAY	HALLMARK_REACTIVE_OXIGEN_SPECIES_PATHWAY		37	0.316479	1.07739	0.35503	0.349179	1	778	tags=16%, list=8%, signal=17%
HALLMARK_ALLOGRAFT_REJECTION	HALLMARK_ALLOGRAFT_REJECTION		69	0.282944	1.06548	0.353057	0.359121	1	2263	tags=36%, list=22%, signal=46%
HALLMARK_INTERFERON_GAMMA_RESPONSE	HALLMARK_INTERFERON_GAMMA_RESPONSE		98	0.249088	0.995871	0.46337	0.481006	1	757	tags=12%, list=7%, signal=13%
HALLMARK_XENOBIOTIC_METABOLISM	HALLMARK_XENOBIOTIC_METABOLISM		117	0.236726	0.96871	0.520295	0.525381	1	1208	tags=16%, list=12%, signal=18%
HALLMARK_NOTCH_SIGNALING	HALLMARK_NOTCH_SIGNALING		27	0.290394	0.887116	0.620278	0.686884	1	1690	tags=30%, list=17%, signal=35%

## Sheet: GSEA_negative
NAME	GS<br> follow link to MSigDB	GS DETAILS	SIZE	ES	NES	NOM p-val	FDR q-val	FWER p-val	RANK AT MAX	LEADING EDGE
HALLMARK_MYC_TARGETS_V1	HALLMARK_MYC_TARGETS_V1	Details ...	188	-0.670429	-3.04825	0	0	0	1292	tags=53%, list=13%, signal=59%
HALLMARK_E2F_TARGETS	HALLMARK_E2F_TARGETS	Details ...	190	-0.6491	-3.00585	0	0	0	2217	tags=62%, list=22%, signal=77%
HALLMARK_G2M_CHECKPOINT	HALLMARK_G2M_CHECKPOINT	Details ...	184	-0.583056	-2.64014	0	0	0	2206	tags=57%, list=22%, signal=72%
HALLMARK_MYC_TARGETS_V2	HALLMARK_MYC_TARGETS_V2	Details ...	58	-0.671692	-2.53377	0	0	0	1026	tags=57%, list=10%, signal=63%
HALLMARK_OXIDATIVE_PHOSPHORYLATION	HALLMARK_OXIDATIVE_PHOSPHORYLATION	Details ...	175	-0.543067	-2.4549	0	0	0	2329	tags=51%, list=23%, signal=66%
HALLMARK_DNA_REPAIR	HALLMARK_DNA_REPAIR	Details ...	131	-0.477172	-2.05987	0	0	0	3666	tags=68%, list=36%, signal=105%
HALLMARK_FATTY_ACID_METABOLISM	HALLMARK_FATTY_ACID_METABOLISM	Details ...	113	-0.36361	-1.55842	0.00226757	0.0153242	0.166	2308	tags=42%, list=23%, signal=54%
HALLMARK_SPERMATOGENESIS	HALLMARK_SPERMATOGENESIS	Details ...	53	-0.41904	-1.53218	0.0159363	0.0172433	0.21	1925	tags=34%, list=19%, signal=42%
HALLMARK_PEROXISOME	HALLMARK_PEROXISOME	Details ...	77	-0.374854	-1.49551	0.0214592	0.0216525	0.284	2705	tags=44%, list=27%, signal=60%
HALLMARK_INTERFERON_ALPHA_RESPONSE	HALLMARK_INTERFERON_ALPHA_RESPONSE	Details ...	46	-0.350953	-1.24317	0.160156	0.138917	0.913	1624	tags=26%, list=16%, signal=31%
HALLMARK_ADIPOGENESIS	HALLMARK_ADIPOGENESIS	Details ...	150	-0.274403	-1.21297	0.0970655	0.15413	0.95	1852	tags=31%, list=18%, signal=38%
HALLMARK_BILE_ACID_METABOLISM	HALLMARK_BILE_ACID_METABOLISM	Details ...	58	-0.270613	-1.02956	0.40795	0.421166	0.999	2323	tags=33%, list=23%, signal=42%
HALLMARK_MITOTIC_SPINDLE	HALLMARK_MITOTIC_SPINDLE	Details ...	183	-0.189961	-0.859602	0.846698	0.769763	1	2235	tags=23%, list=22%, signal=30%
